# Supplementary material for: Enhancing energy transfer through visible-light-driven polymerization in a metal–organic framework
Source: Royal Society of Chemistry journal article supplement (doi:10.1039/d3ta03446a), 2023-01-01
Supplement: d3ta03446a1.pdf [file d3ta03446a1.pdf]

## **Enhancing Energy Transfer through Visible Light-Driven Polymerization in Metal-Organic Framework**

Yuan Chen<sup>a</sup>, Ao-Gang Liu<sup>a</sup>, Peng-Da Liu<sup>a</sup>, Zi-Tong Chen<sup>a</sup>, Shi-Yu Liu<sup>b</sup>, Bao Li<sup>a\*</sup>

<sup>a</sup> Key laboratory of Material Chemistry for Energy Conversion and Storage, Semiconductor chemistry center, School of Chemistry and Chemical Engineering, Hubei Key Laboratory of Bioinorganic Chemistry&Materia Medica, Huazhong University of Science and Technology, Wuhan, Hubei 430074, People's Republic of China. Email:libao@hust.edu.cn

<sup>b</sup> Wuhan National High Magnetic Field Center, Huazhong University of Science and Technology, Wuhan, Hubei 430074, People's Republic of China.

## Content

|                                                                                                                                                                                        |    |
|----------------------------------------------------------------------------------------------------------------------------------------------------------------------------------------|----|
| Experimental Section .....                                                                                                                                                             | 1  |
| N <sub>2</sub> Sorption Measurement. ....                                                                                                                                              | 3  |
| Electrochemical measurements. ....                                                                                                                                                     | 3  |
| X-Ray Structural Determination. ....                                                                                                                                                   | 4  |
| Theoretical calculation .....                                                                                                                                                          | 4  |
| <b>Figure S1.</b> (a)-(c) The partial view of porous structure of Zr-MOF from three directions; (d) pore diagram of Zr-MOF. ....                                                       | 6  |
| <b>Table S1.</b> The dynamic structural transformation of crystal parameters along with the increasing light time and crystal data and structure refinement for Zr-MOF (HUST-28) ..... | 7  |
| <b>Table S2.</b> Bond Lengths for Zr-MOF .....                                                                                                                                         | 9  |
| <b>Figure S2.</b> XRD patterns of Zr-MOF after immersing in aqueous solution with different pH .....                                                                                   | 10 |
| <b>Figure S3.</b> N <sub>2</sub> adsorption/desorption curves at 77K for Zr-MOF .....                                                                                                  | 10 |
| <b>Figure S4.</b> TGA curve of as-synthesized Zr-MOF. ....                                                                                                                             | 11 |
| <b>Figure S5.</b> Color change of Zr-MOF in DCM before and after illumination ( above); color change of Zr-MOF in DCM solution of TEMPO before and after illumination ( below). ....   | 11 |
| <b>Figure S6.</b> High-resolution XPS spectra of Zr-MOF before and after irradiation. ....                                                                                             | 12 |
| <b>Table S3.</b> Crystal data and structure refinement for Zr-MOF-hv 5min. ....                                                                                                        | 12 |
| <b>Table S4.</b> Bond Lengths for Zr-MOF-hv 5min. ....                                                                                                                                 | 14 |
| <b>Figure S7.</b> (a)-(c) The partial view of Zr-MOF-hv 10min porous structure from three directions; (d) Zr-MOF-hv 10 min pore diagram. ....                                          | 15 |
| <b>Table S5.</b> Crystal data and structure refinement for Zr-MOF-hv 10min. ....                                                                                                       | 15 |
| <b>Table S6.</b> Bond Lengths for Zr-MOF-hv 10min. ....                                                                                                                                | 17 |
| <b>Figure S8.</b> (a)-(c) The partial view of Zr-MOF-hv 20min porous structure from three directions; (d) Zr-MOF-hv 20 min pore diagram. ....                                          | 18 |
| <b>Table S7.</b> Crystal data and structure refinement for Zr-MOF-hv 20min. ....                                                                                                       | 18 |
| <b>Table S8.</b> Bond Lengths for Zr-MOF-hv 20min. ....                                                                                                                                | 20 |
| <b>Figure S9.</b> (a)-(c) The partial view of Zr-MOF-hv 30min porous structure from three directions; (d) Zr-MOF-hv 30 min pore diagram. ....                                          | 21 |
| <b>Table S9.</b> Crystal data and structure refinement for Zr-MOF-hv 30min. ....                                                                                                       | 21 |
| <b>Table S10.</b> Bond Lengths for Zr-MOF-hv 30min. ....                                                                                                                               | 23 |
| <b>Table S11.</b> Crystal data and structure refinement for Zr-MOF-hv 40min. ....                                                                                                      | 24 |

|                                                                                                                                                                           |    |
|---------------------------------------------------------------------------------------------------------------------------------------------------------------------------|----|
| <b>Table S12.</b> Bond Lengths for Zr-MOF-hv40min. ....                                                                                                                   | 25 |
| <b>Table S13.</b> Crystal data and structure refinement for Zr-MOF-hv 50min.....                                                                                          | 26 |
| <b>Table S14.</b> Bond Lengths for Zr-MOF-hv 50min. ....                                                                                                                  | 27 |
| <b>Figure S10.</b> (a)-(c) The partial view of Zr-MOF-hv 120min porous structure from three directions; (d) Zr-MOF-hv 120 min pore diagram.....                           | 28 |
| <b>Table S15.</b> Crystal data and structure refinement for Zr-MOF-hv120min.....                                                                                          | 28 |
| <b>Table S16.</b> Bond Lengths for Zr-MOF-hv120min. ....                                                                                                                  | 30 |
| <b>Figure S11.</b> Solid <sup>13</sup> C NMR spectra along with increasing light time .....                                                                               | 31 |
| <b>Figure S12.</b> N <sub>2</sub> adsorption/desorption curves at 77K for Zr-MOF-hv .....                                                                                 | 32 |
| <b>Figure S13.</b> The distribution of HOMO orbital (a) and LUMO orbital (b) in Zr <sub>6</sub> -L.....                                                                   | 32 |
| <b>Figure S14.</b> The distribution of HOMO orbital (a) and LUMO orbital (b) in Zr <sub>6</sub> -L-radical .....                                                          | 32 |
| <b>Figure S15.</b> The distribution of HOMO orbital (a) and LUMO orbital (b) in Zr <sub>6</sub> -L-O <sub>2</sub> 33                                                      |    |
| <b>Figure S16.</b> The distribution of HOMO orbital (a) and LUMO orbital (b) in Zr <sub>6</sub> -L-O <sub>2</sub> -radical .....                                          | 33 |
| <b>Figure S17.</b> The distribution of HOMO orbital (a) and LUMO orbital (b) in Zr <sub>6</sub> -L-hv33                                                                   |    |
| <b>Figure S18.</b> (a) the view of bond order for Zr <sub>6</sub> -L-hv unit;(b) the enlarged view of bond order for the central part of Zr <sub>6</sub> -L-hv unit. .... | 34 |
| <b>Figure S19.</b> The distribution of HOMO orbital (a) and LUMO orbital (b) in Zr <sub>6</sub> -L-hv-biradical .....                                                     | 35 |
| <b>Table S17.</b> The optimized Coordinates (Angstroms) for final two original units .....                                                                                | 35 |
| <b>Table S18.</b> The optimized Coordinates (Angstroms) for final TS1.....                                                                                                | 38 |
| <b>Table S19.</b> The optimized Coordinates (Angstroms) for final TS2.....                                                                                                | 41 |
| <b>Table S20.</b> The optimized Coordinates (Angstroms) for final TS3.....                                                                                                | 45 |
| <b>Table S21.</b> The optimized Coordinates (Angstroms) for final state.....                                                                                              | 49 |
| <b>Figure S20.</b> Schematic diagram of the free energy change in each step of the selected bimolecular unit polymerization process .....                                 | 52 |
| <b>Figure S21.</b> Fluorescence quenching of Zr-MOF-hv with increasing the concentration of THF (a) and 1a (b) .....                                                      | 53 |
| <b>Figure S22.</b> High-resolution mass spectrometry (HRMS) data for free radical trapping experiments .....                                                              | 53 |
| Characterization Data of the Products.....                                                                                                                                | 53 |

## Experimental Section

### Materials and Methods

All reagents and solvents used in the experimental procedure were purchased commercially and used without further purification. FTIR spectra ( $4000\text{--}400\text{ cm}^{-1}$ ) were obtained by using an INVENIO-R Fourier transform mid-IR spectrometer (KBr pressed slices).  $^1\text{H}$  Nuclear magnetic resonance (NMR) data were measured on a Bruker AV-400. Thermogravimetric analysis (TGA) was performed on a Perkin-Elmer TGA4000 analyzer from room temperature to  $800^\circ\text{C}$  at a rate of  $10^\circ\text{C}/\text{min}$  under  $\text{N}_2$  atmosphere. X-ray powder diffraction (XRD) was obtained using a SmartLab-SE type X-ray diffractometer with a  $\text{Cu-K}_\alpha$  target in the range of  $5\text{--}50^\circ$  and a scan rate of  $10^\circ/\text{min}$ . All fluorescence spectra were measured with an RF-5301PC fluorescence spectrophotometer. The ultraviolet-visible (UV-vis) absorption spectra were measured at room temperature using a UV-3600 UV, visible, and near-infrared spectrophotometer. Gas adsorption experiments were performed using a Micromeritics ASAP 2460 instrument for gas adsorption testing.

### Syntheses of $\text{H}_4\text{L}$

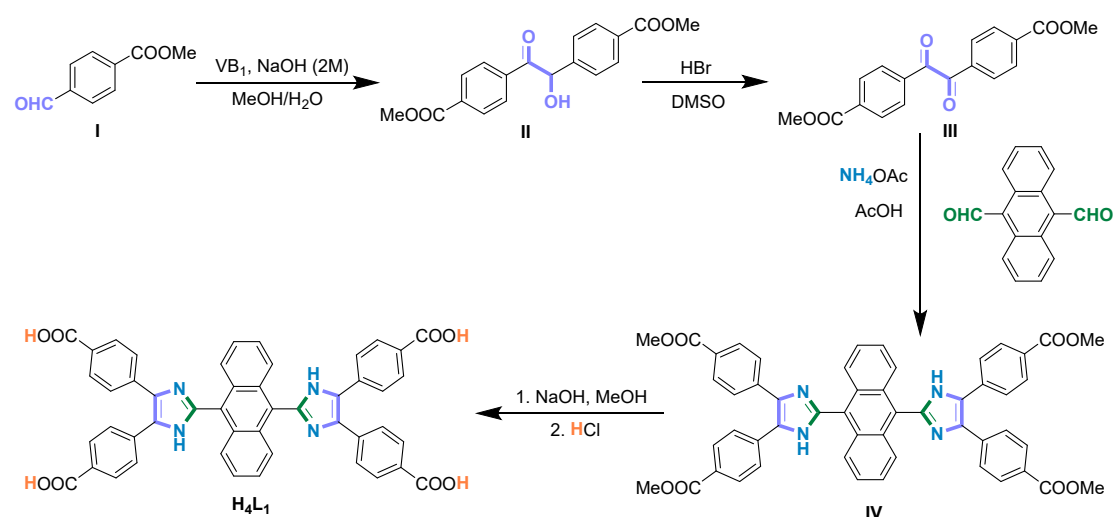

### Synthesis of **II**

Vitamin  $\text{B}_1$  (1.1 g, 0.81 mmol),  $\text{MeOH}$  (18 mL) and  $\text{H}_2\text{O}$  (6 mL) was added to a 150 mL round-bottomed flask, and the mixture was cooled down in ice water. Subsequently, 2 M  $\text{NaOH}$  solution was introduced to adjust the pH to 9 over a period of time followed

by **I** (9.0 g, 54.87 mmol). Then, the contents were gradually heated to 85 °C and kept for 4 h. After cooling down to room temperature, the resultant precipitate was filtered, washed with cold MeOH and water, and dried at an 80 °C oven to obtain **II** as an off-white solid in 85 % yield.

#### *Synthesis of **III***

A mixture of **II** (7.4 g, 18.24 mmol), DMSO (50 mL) and 48% aqueous HBr (10.5 mL) was placed in a 150 mL round-bottomed flask. And the mixture was stirred at 60 °C for 24 h. After completion of the reaction, the mixture was poured into ice-cold water. The yellow precipitate was collected by filtration, washed with water and dried. The crude product was recrystallized from MeOH to afford **III** as a yellow solid in 90% yield.

#### *Synthesis of **IV***

The obtained product **III** (3.3 g, 10.05 mmol), anthracene-9,10-dicarbaldehyde (0.79 g, 3.36 mmol), ammonium acetate (5.19 g, 67.2 mmol) was dissolved in acetic acid (45 mL). The solution was heated and refluxed for 24 h. After completion of the reaction, the mixture was poured into ice-cold water. The precipitate was collected by filtration and washed with water. The crude product was washed with CHCl<sub>3</sub>/MeOH (50:50) mixture to afford **IV** as a yellow solid in 75% yield.

#### *Synthesis of **H<sub>4</sub>L***

The obtained tetraester **IV** (2.00 g, 2.68 mmol) and NaOH (3.20 g, 79.60 mmol) was placed in the mixture of MeOH (50 mL) and H<sub>2</sub>O (20 mL). The mixture was heated and refluxed for 24 h. After cooling to room temperature, MeOH was removed in vacuum. The remaining aqueous solution was acidized with 2 M HCl to give yellow precipitate. The precipitate was filtered, washed with water and dried to obtain product H<sub>4</sub>L<sub>1</sub> as a yellow solid in 96% yield.

#### **Synthesis of Zr-MOF**

A 5 mL glass vial was added with H<sub>4</sub>L<sub>1</sub> (10 mg), ZrCl<sub>4</sub> (17 mg), DMF (2 mL) and glacial acetic acid (1.4 mL) with sonication to mix well. Then, the solution was heated at 120 °C for 3 days. Yellow spindle-shaped crystals were obtained, filtered and then washed thoroughly with DMF, finally activated with MeOH. (yield: 60% based on

H<sub>4</sub>L<sub>1</sub>).

### **Synthesis of Zr-BBI.**

A 10 mL glass vial was added with H<sub>4</sub>L<sub>2</sub> (24 mg), ZrCl<sub>4</sub> (14 mg), DMF (5 mL) and HCOOH (2.8 mL) with sonication to mix well. Then, the solution was heated at 120 °C for 3 days. Yellow rectangular flaky crystals were obtained, filtered and then washed thoroughly with DMF, finally activated with MeOH.

### **Synthesis of Zr-DPA.**

A 5 mL glass vial was added with H<sub>4</sub>L<sub>3</sub> (4 mg), ZrCl<sub>4</sub> (7 mg), DMF (1 mL) and glacial acetic acid (0.25 mL) with sonication to mix well. Then, the solution was heated at 120 °C for 3 days. Yellow rectangular flaky crystals were obtained, filtered and then washed thoroughly with DMF, finally activated with MeOH.

### **N<sub>2</sub> Sorption Measurement.**

Before gas sorption experiments, the as-synthesized sample of Zr-MOF and Zr-MOF-hv was washed with DMF and immersed in MeOH for 3 days, during which the solvent was decanted and freshly replenished three times. The solvent was removed under vacuum at 60 °C, yielding porous material. The N<sub>2</sub> sorption measurement was then conducted using a Micromeritics ASAP 2020 system.

### **Electrochemical measurements.**

Electrochemical measurements were performed on a CHI 660C electrochemical workstation (Shanghai, China) with a standard three-electrode system. To prepare the catalyst-modified electrodes, the photocatalyst (10 mg) was sonicated and dispersed in a mixed solution of methanol (1.5 mL) and nafion (10 μL) to form a slurry, which was then spread on ITO glass with an exposed area of 0.36 cm<sup>2</sup> and then heated at 60 °C for 6 h. The working electrode was irradiated under a 10 W white LED lamp using 0.5 M Na<sub>2</sub>SO<sub>4</sub> aqueous solution as the electrolyte. Measurement of transient photocurrent response of samples at 0.2 V operating voltage and EIS Nyquist at 1.5 V operating voltage. Pt wire and Ag/AgCl electrodes with saturated KCl solution were used as the counter and reference electrodes respectively.

### **X-Ray Structural Determination.**

Diffraction data for Zr-MOF, Zr-MOF-hv-5 min, Zr-MOF-hv-10 min, Zr-MOF-hv-20 min, Zr-MOF-hv-30 min, Zr-MOF-hv-40 min, Zr-MOF-hv-50 min, Zr-MOF-hv-120 min ( $0.1 \times 0.05 \times 0.05$  mm) was collected via Bruker Venture using Cu- $K_{\alpha}$  ( $\lambda = 1.54178$  Å) radiation at 100 K in Shanghai Synchrotron Radiation Facility. The structures of complexes were solved by direct methods, and the non-hydrogen atoms were located from the trial structure and then refined anisotropically with SHELXTL using a full-matrix leastsquares procedure based on  $F^2$  values. The hydrogen atom positions were fixed geometrically at calculated distances and allowed to ride on the parent atoms. Attempts to define the highly disordered solvent molecules were unsuccessful, so the structure was refined with the PLATON “SQUEEZE” procedure. The diffraction intensity of crystal sample was very weak due to the very small size and low density, which must be responsible for the corresponding alert A. CCDC-2235394-2235400 for Zr-MOF, Zr-MOF-hv 5min, Zr-MOF-hv 10min, Zr-MOF-hv 20min, Zr-MOF-hv 30min, Zr-MOF-hv 40min, Zr-MOF-hv 50min, and Zr-MOF-hv 120min contain the supplementary crystallographic data for this paper. These data can be obtained free of charge from The Cambridge Crystallographic Data Centre via <http://www.ccdc.cam.ac.uk/datarequest/cif>.

### **Theoretical calculation**

The structures of intermediates were optimized by Dmol<sup>3</sup> module, following by the frequency calculation to obtain zero point vibration energy and Gibbs free energy. The generalized gradient approximation (GGA) with the Perdew-Burke-Ernzerhof (PBE) function and TS for DFT-D correction were employed. The convergence tolerance of energy, force and displacement convergence were set as  $1 \times 10^{-5}$  Ha,  $2 \times 10^{-3}$  Ha, and  $5 \times 10^{-3}$  Å, respectively. The core treatment was chosen as the effective core potential (ECP), and the electron treatment was performed by double numerical plus d-functions (DNP) basis set. For Figure 7 and 9, the model had been selected as four Zr<sub>6</sub>O<sub>8</sub> clusters linked with one ligand. The peripheral of Zr<sub>6</sub> cluster was modified by formic acid. For Figure 8, the model had been selected as two units containing only one anthracene ring and two imidazole rings. In order to simulate the spatial confinement effect of Zr-MOF,

the distance between the carbon atoms in the center of the anthracene rings and the imidazole rings were restricted according to the single-crystal X-ray results. For Figure 11, the change of free energies for every step were calculated by the following reaction equation:  $\Delta G = \Delta E + \Delta G(298.15 \text{ K})$ , in which  $\Delta G(298.15 \text{ K})$  contains the change of the zero point vibration energy. Additionally, TD-DFT calculations had been carried out with ALDA model and the same parameters, excepted for DNP of 4.4.

### **Photoactivity experiments**

The photoactivity experiments of Zr-MOF was tested with an 32 W compact fluorescent lamp (380-800 nm ) as the visible light source for photochromic behavior, and with 10 W 365 nm LED for 12h at room temperature for photocatalysis. To evaluate the stability and reusability of the photocatalysts, experiments were performed in five consecutive cycles using the recovered catalysts. After each reaction, the solid photocatalyst was collected by centrifugation and washed thoroughly with ultrapure water and ethanol for the next test.



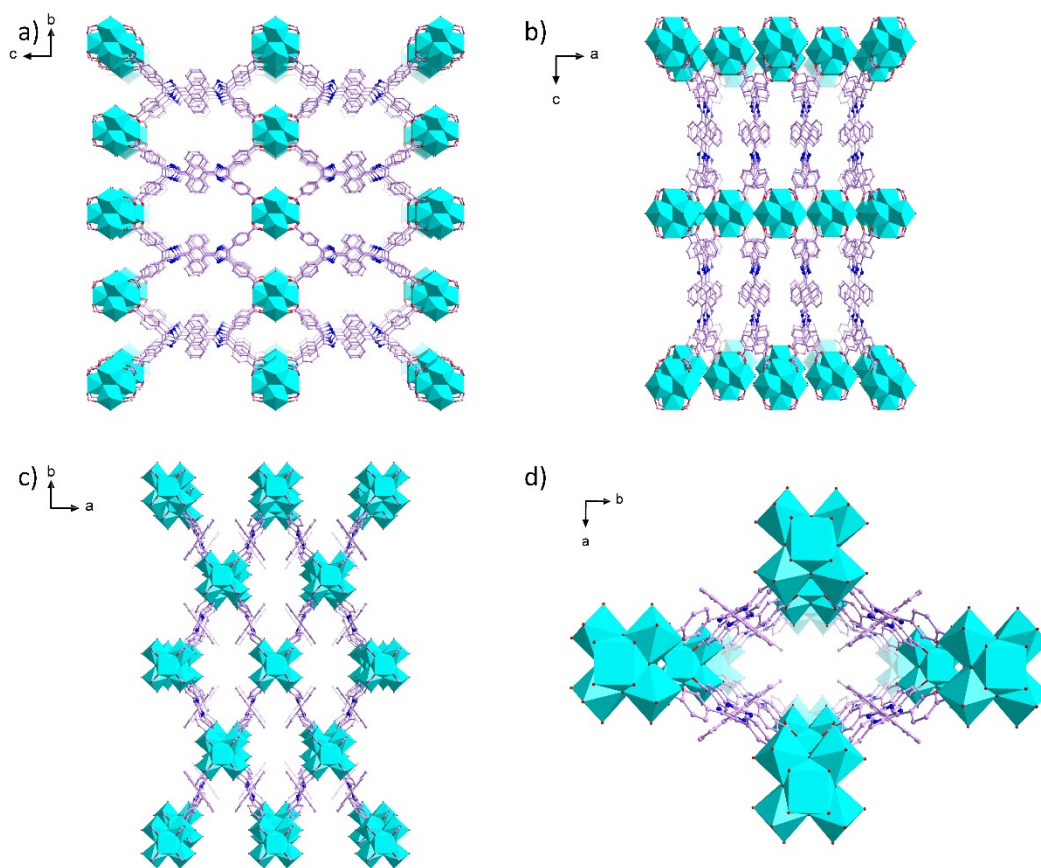

**Figure S1.** (a)-(c) The partial view of porous structure of Zr-MOF from three directions; (d) pore diagram of Zr-MOF.

**Table S1.** The dynamic structural transformation of crystal parameters along with the increasing light time and crystal data and structure refinement for Zr-MOF (HUST-28)

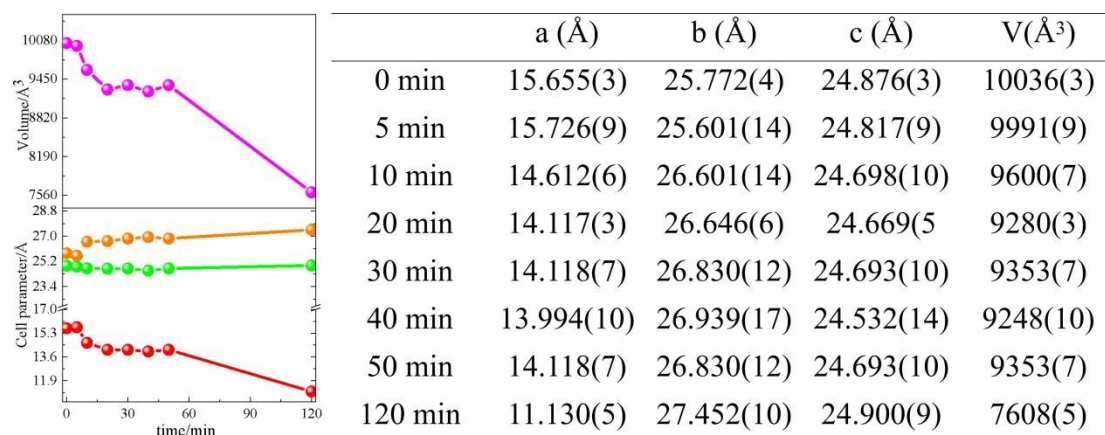

| Zr-MOF-0min                          |                                                                                |
|--------------------------------------|--------------------------------------------------------------------------------|
| Empirical formula                    | C <sub>48</sub> H <sub>24</sub> N <sub>4</sub> O <sub>16</sub> Zr <sub>3</sub> |
| Formula weight                       | 1186.37                                                                        |
| Temperature/K                        | 100                                                                            |
| Crystal system                       | orthorhombic                                                                   |
| Space group                          | Cmmm                                                                           |
| a/Å                                  | 15.655(3)                                                                      |
| b/Å                                  | 25.772(4)                                                                      |
| c/Å                                  | 24.876(3)                                                                      |
| α/°                                  | 90                                                                             |
| β/°                                  | 90                                                                             |
| γ/°                                  | 90                                                                             |
| Volume/Å <sup>3</sup>                | 10037(2)                                                                       |
| Z                                    | 4                                                                              |
| ρ <sub>calc</sub> /g/cm <sup>3</sup> | 0.785                                                                          |
| μ/mm <sup>-1</sup>                   | 0.342                                                                          |
| F(000)                               | 2352.0                                                                         |
| Radiation                            | CuK <sub>α</sub> (λ = 1.54178)                                                 |

|                                                  |                                                               |
|--------------------------------------------------|---------------------------------------------------------------|
| 2 $\Theta$ range for data collection/ $^{\circ}$ | 3.044 to 49.416                                               |
| Index ranges                                     | $-18 \leq h \leq 18, -30 \leq k \leq 30, -28 \leq l \leq 28$  |
| Reflections collected                            | 27787                                                         |
| Independent reflections                          | 4606 [ $R_{\text{int}} = 0.1496, R_{\text{sigma}} = 0.0960$ ] |
| Data/restraints/parameters                       | 4606/42/171                                                   |
| Goodness-of-fit on $F^2$                         | 1.059                                                         |
| Final R indexes [ $I \geq 2\sigma(I)$ ]          | $R_1 = 0.0879, wR_2 = 0.2368$                                 |
| Final R indexes [all data]                       | $R_1 = 0.1143, wR_2 = 0.2608$                                 |
| Largest diff. peak/hole / $e \text{ \AA}^{-3}$   | 2.63/-1.84                                                    |

---

**Table S2. Bond Lengths for Zr-MOF**

| Atom Atom Length/Å |                  |            | Atom Atom Length/Å |                  |           |
|--------------------|------------------|------------|--------------------|------------------|-----------|
| Zr1                | Zr2              | 3.5010(10) | Zr2                | O4 <sup>7</sup>  | 2.138(6)  |
| Zr1                | Zr2 <sup>1</sup> | 3.5010(10) | O1                 | C1               | 1.271(8)  |
| Zr1                | Zr2 <sup>2</sup> | 3.5010(10) | O2                 | C1               | 1.254(8)  |
| Zr1                | Zr2 <sup>3</sup> | 3.5010(10) | N1                 | C8               | 1.418(9)  |
| Zr1                | O1               | 2.172(5)   | N1                 | C9               | 1.341(8)  |
| Zr1                | O1 <sup>4</sup>  | 2.172(5)   | C2                 | C1               | 1.500(9)  |
| Zr1                | O1 <sup>5</sup>  | 2.172(5)   | C2                 | C7               | 1.399(11) |
| Zr1                | O1 <sup>3</sup>  | 2.172(5)   | C2                 | C3               | 1.351(11) |
| Zr1                | O3               | 2.211(9)   | C6                 | C7               | 1.392(10) |
| Zr1                | O3 <sup>5</sup>  | 2.211(9)   | C6                 | C5               | 1.378(11) |
| Zr1                | O4 <sup>5</sup>  | 2.173(9)   | C10                | C9               | 1.511(14) |
| Zr1                | O4               | 2.173(9)   | C10                | C11              | 1.396(12) |
| Zr2                | Zr2 <sup>2</sup> | 3.541(2)   | C10                | C11 <sup>8</sup> | 1.396(12) |
| Zr2                | Zr2 <sup>3</sup> | 3.5481(18) | C5                 | C8               | 1.496(10) |
| Zr2                | O2 <sup>6</sup>  | 2.287(5)   | C5                 | C4               | 1.402(11) |
| Zr2                | O2 <sup>3</sup>  | 2.287(5)   | C8                 | C8 <sup>8</sup>  | 1.324(15) |
| Zr2                | O5               | 2.178(10)  | C3                 | C4               | 1.378(10) |
| Zr2                | O6               | 2.160(9)   | C11                | C11 <sup>9</sup> | 1.392(18) |
| Zr2                | O3 <sup>7</sup>  | 2.148(5)   | C11                | C12              | 1.432(15) |
| Zr2                | O3               | 2.148(5)   | C12                | C13              | 1.361(17) |
| Zr2                | O4               | 2.138(6)   | C13                | C13 <sup>9</sup> | 1.47(3)   |

**Asymmetric code:** <sup>1</sup>1-X,1-Y,1-Z; <sup>2</sup>1-X,+Y,1-Z; <sup>3</sup>+X,1-Y,+Z; <sup>4</sup>1-X,+Y,+Z; <sup>5</sup>1-X,1-Y,+Z; <sup>6</sup>+X,1-Y,1-Z; <sup>7</sup>+X,+Y,1-Z; <sup>8</sup>3/2-X,3/2-Y,+Z; <sup>9</sup>+X,+Y,2-Z

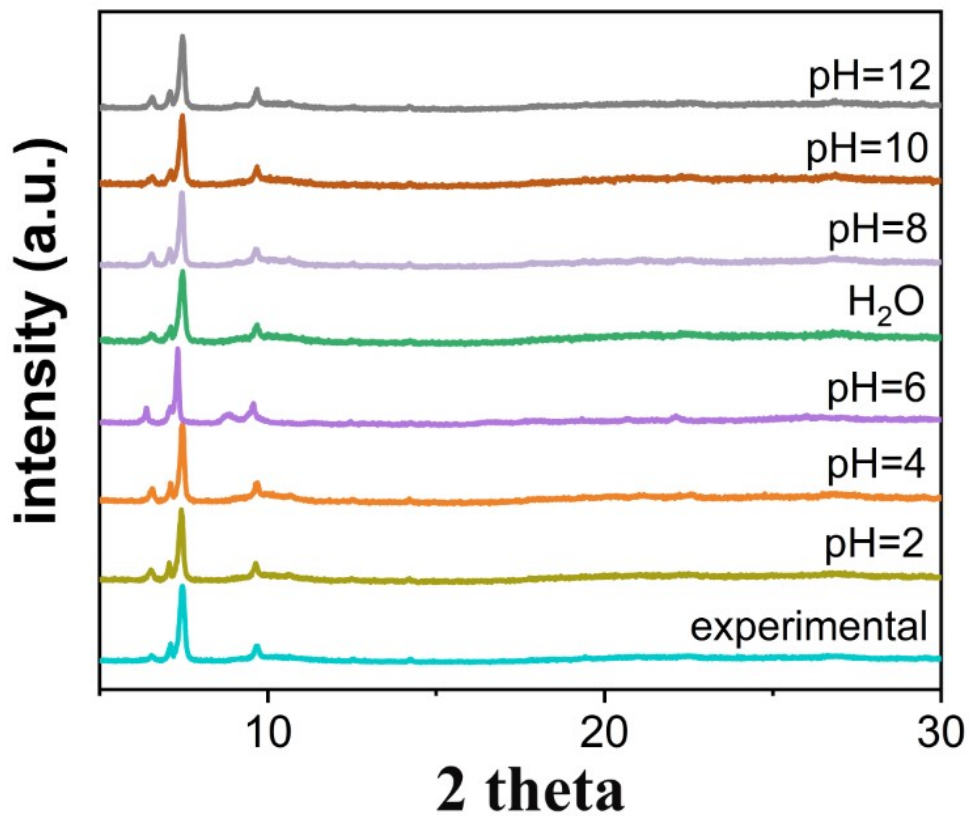

Figure S2. XRD patterns of Zr-MOF after immersing in aqueous solution with different pH

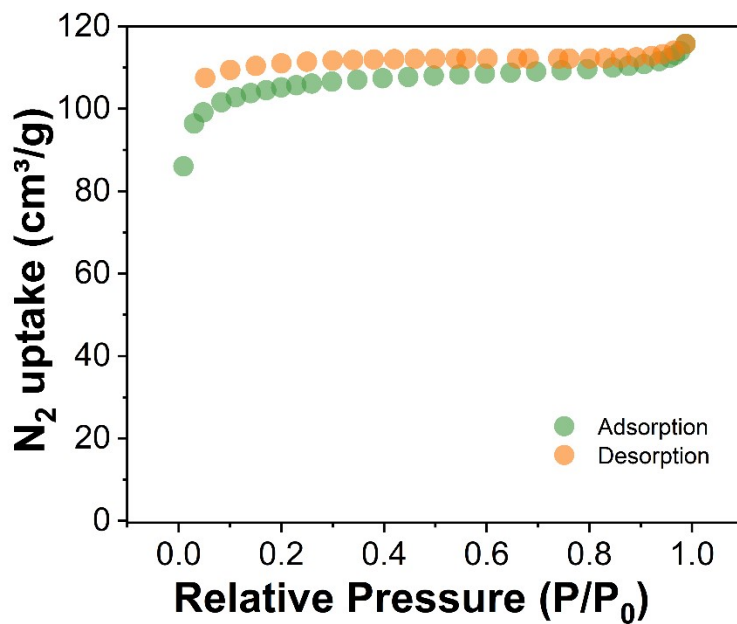

Figure S3. N<sub>2</sub> adsorption/desorption curves at 77K for Zr-MOF

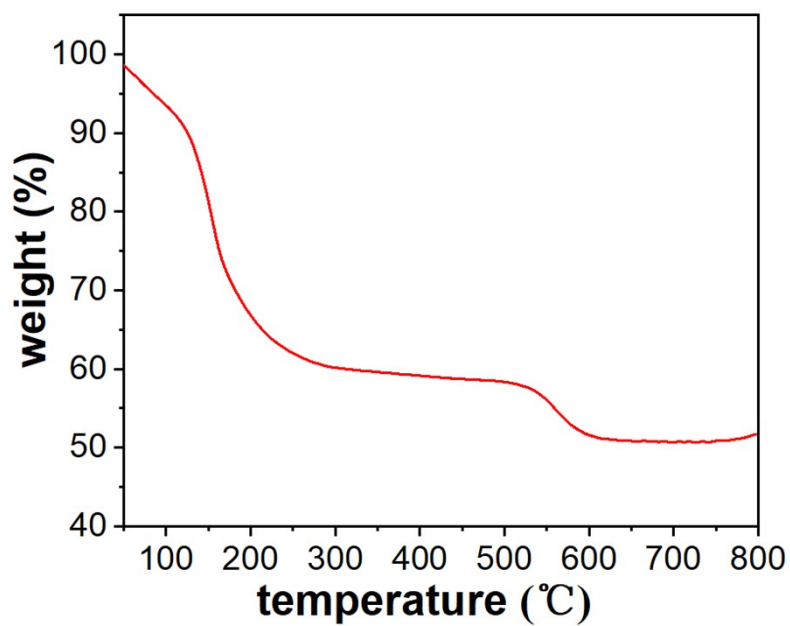

**Figure S4.** TGA curve of as-synthesized Zr-MOF.

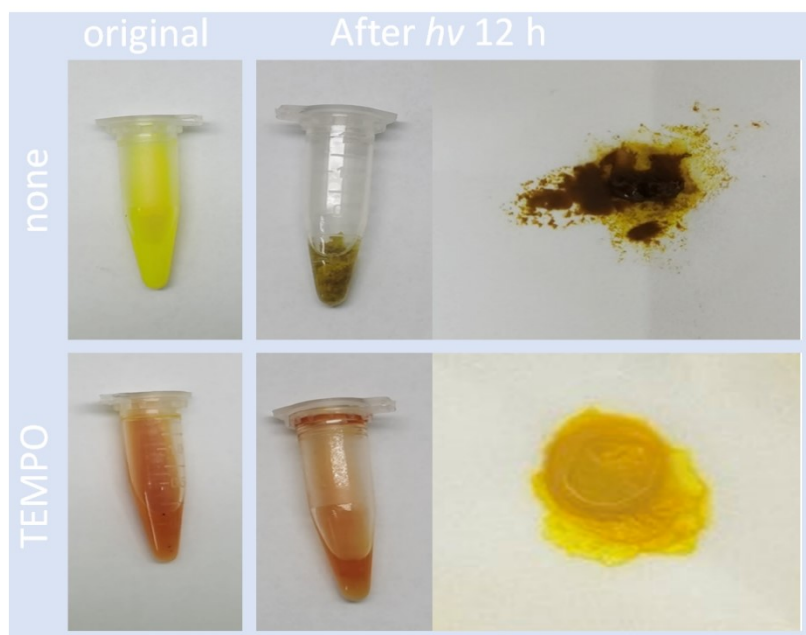

**Figure S5.** Color change of Zr-MOF in DCM before and after illumination ( above); color change of Zr-MOF in DCM solution of TEMPO before and after illumination ( below).

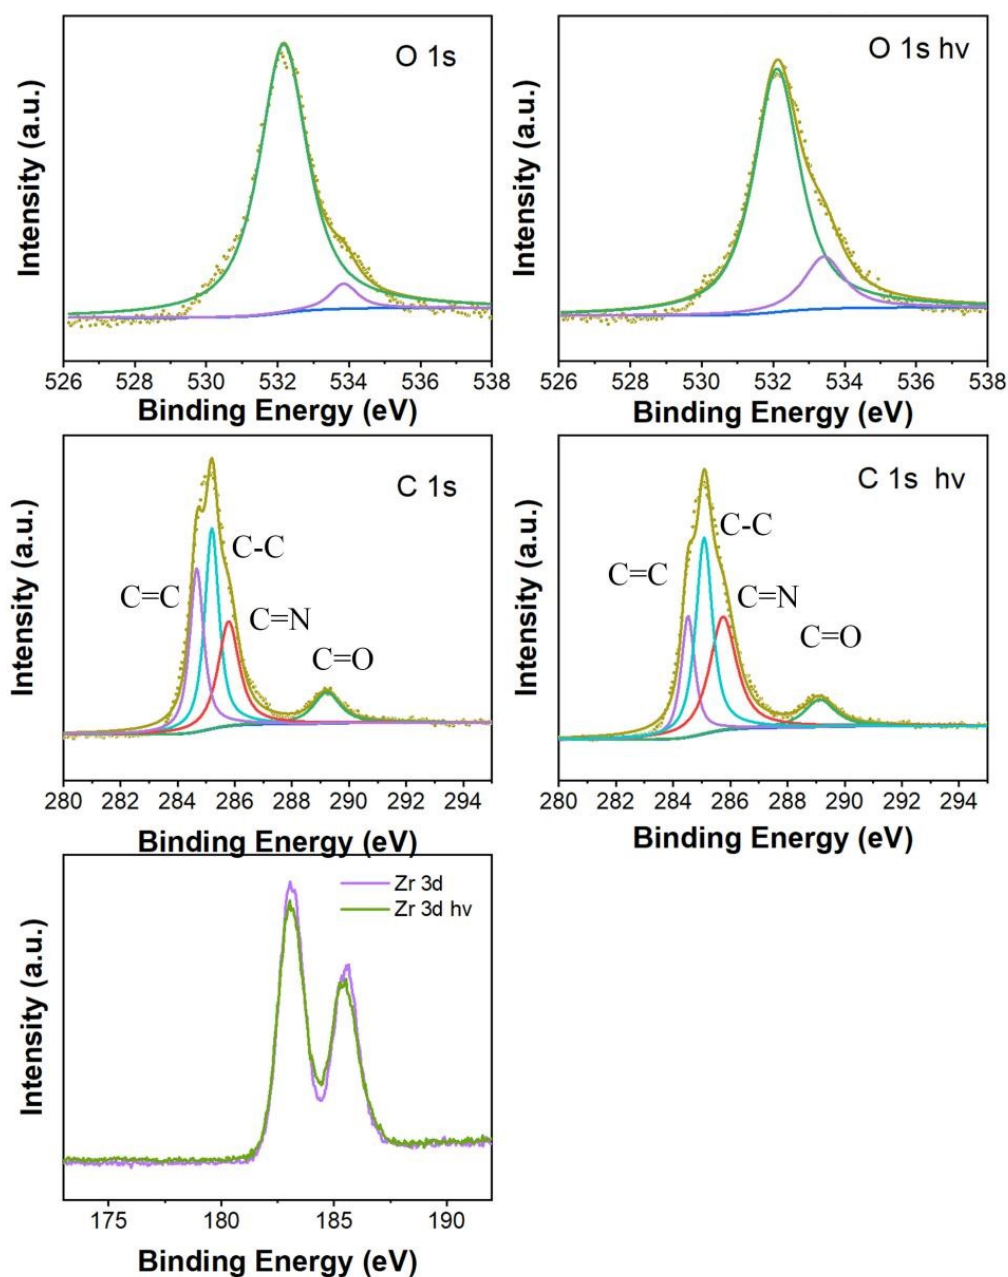

Figure S6. High-resolution XPS spectra of Zr-MOF before and after irradiation.

Table S3. Crystal data and structure refinement for Zr-MOF-hv 5min.

|                     |                             |
|---------------------|-----------------------------|
| Identification code | Zr-MOF-hv 5min              |
| Empirical formula   | $C_{48}H_{24}N_4O_{16}Zr_3$ |
| Formula weight      | 1186.37                     |
| Temperature/K       | 100                         |
| Crystal system      | orthorhombic                |

|                                             |                                                                        |
|---------------------------------------------|------------------------------------------------------------------------|
| Space group                                 | Cmmm                                                                   |
| a/Å                                         | 15.726(9)                                                              |
| b/Å                                         | 25.601(14)                                                             |
| c/Å                                         | 24.817(9)                                                              |
| $\alpha$ /°                                 | 90                                                                     |
| $\beta$ /°                                  | 90                                                                     |
| $\gamma$ /°                                 | 90                                                                     |
| Volume/Å <sup>3</sup>                       | 9991(8)                                                                |
| Z                                           | 4                                                                      |
| $\rho_{\text{calc}}$ /cm <sup>3</sup>       | 0.789                                                                  |
| $\mu$ /mm <sup>-1</sup>                     | 0.343                                                                  |
| F(000)                                      | 2352.0                                                                 |
| Radiation                                   | CuK $\alpha$ ( $\lambda$ = 1.54178)                                    |
| 2 $\Theta$ range for data collection/°      | 3.04 to 35.994                                                         |
| Index ranges                                | -13 $\leq$ h $\leq$ 13, -22 $\leq$ k $\leq$ 22, -21 $\leq$ l $\leq$ 21 |
| Reflections collected                       | 25605                                                                  |
| Independent reflections                     | 1905 [ $R_{\text{int}}$ = 0.1850, $R_{\text{sigma}}$ = 0.0843]         |
| Data/restraints/parameters                  | 1905/212/172                                                           |
| Goodness-of-fit on F <sup>2</sup>           | 1.264                                                                  |
| Final R indexes [ $I \geq 2\sigma(I)$ ]     | $R_1$ = 0.1143, $wR_2$ = 0.3148                                        |
| Final R indexes [all data]                  | $R_1$ = 0.1495, $wR_2$ = 0.3506                                        |
| Largest diff. peak/hole / e Å <sup>-3</sup> | 0.96/-1.34                                                             |

---



**Table S4.** Bond Lengths for Zr-MOF-hv 5min.

| Atom Atom Length/Å |                   |           | Atom Atom Length/Å |                  |           |
|--------------------|-------------------|-----------|--------------------|------------------|-----------|
| Zr01               | Zr02 <sup>1</sup> | 3.489(3)  | Zr02               | O5               | 2.28(2)   |
| Zr01               | Zr02 <sup>2</sup> | 3.489(3)  | O1                 | C1               | 1.212(16) |
| Zr01               | Zr02 <sup>3</sup> | 3.489(3)  | O2                 | C1               | 1.278(17) |
| Zr01               | Zr02              | 3.489(3)  | C2                 | C1               | 1.42(2)   |
| Zr01               | O1 <sup>4</sup>   | 2.195(10) | C2                 | C3               | 1.353(17) |
| Zr01               | O1 <sup>2</sup>   | 2.195(10) | C2                 | C7               | 1.482(14) |
| Zr01               | O1 <sup>5</sup>   | 2.195(10) | C6                 | C5               | 1.408(19) |
| Zr01               | O1                | 2.195(10) | C6                 | C7               | 1.322(18) |
| Zr01               | O3 <sup>4</sup>   | 2.182(12) | C3                 | C4               | 1.430(19) |
| Zr01               | O3                | 2.182(13) | N1                 | C8               | 1.360(17) |
| Zr01               | O4                | 2.147(11) | N1                 | C9               | 1.356(16) |
| Zr01               | O4 <sup>4</sup>   | 2.147(11) | C5                 | C4               | 1.385(19) |
| Zr02               | Zr02 <sup>1</sup> | 3.531(7)  | C5                 | C8               | 1.483(19) |
| Zr02               | Zr02 <sup>2</sup> | 3.536(5)  | C8                 | C8 <sup>7</sup>  | 1.36(3)   |
| Zr02               | O2 <sup>3</sup>   | 2.262(10) | C10                | C9               | 1.449(18) |
| Zr02               | O2 <sup>4</sup>   | 2.262(10) | C10                | C11 <sup>7</sup> | 1.424(15) |
| Zr02               | O3 <sup>6</sup>   | 2.125(6)  | C10                | C11              | 1.424(15) |
| Zr02               | O3                | 2.125(6)  | C11                | C11 <sup>8</sup> | 1.410(18) |
| Zr02               | O4                | 2.133(8)  | C11                | C12              | 1.439(17) |
| Zr02               | O4 <sup>6</sup>   | 2.133(8)  | C13                | C13 <sup>8</sup> | 1.47(2)   |
| Zr02               | O6                | 2.186(13) | C13                | C12              | 1.448(18) |

**Asymmetric code:** <sup>1</sup>1-X,+Y,1-Z; <sup>2</sup>+X,1-Y,+Z; <sup>3</sup>1-X,1-Y,1-Z; <sup>4</sup>1-X,1-Y,+Z; <sup>5</sup>1-X,+Y,+Z; <sup>6</sup>+X,+Y,1-Z; <sup>7</sup>1/2-X,1/2-Y,+Z; <sup>8</sup>+X,+Y,-

Z

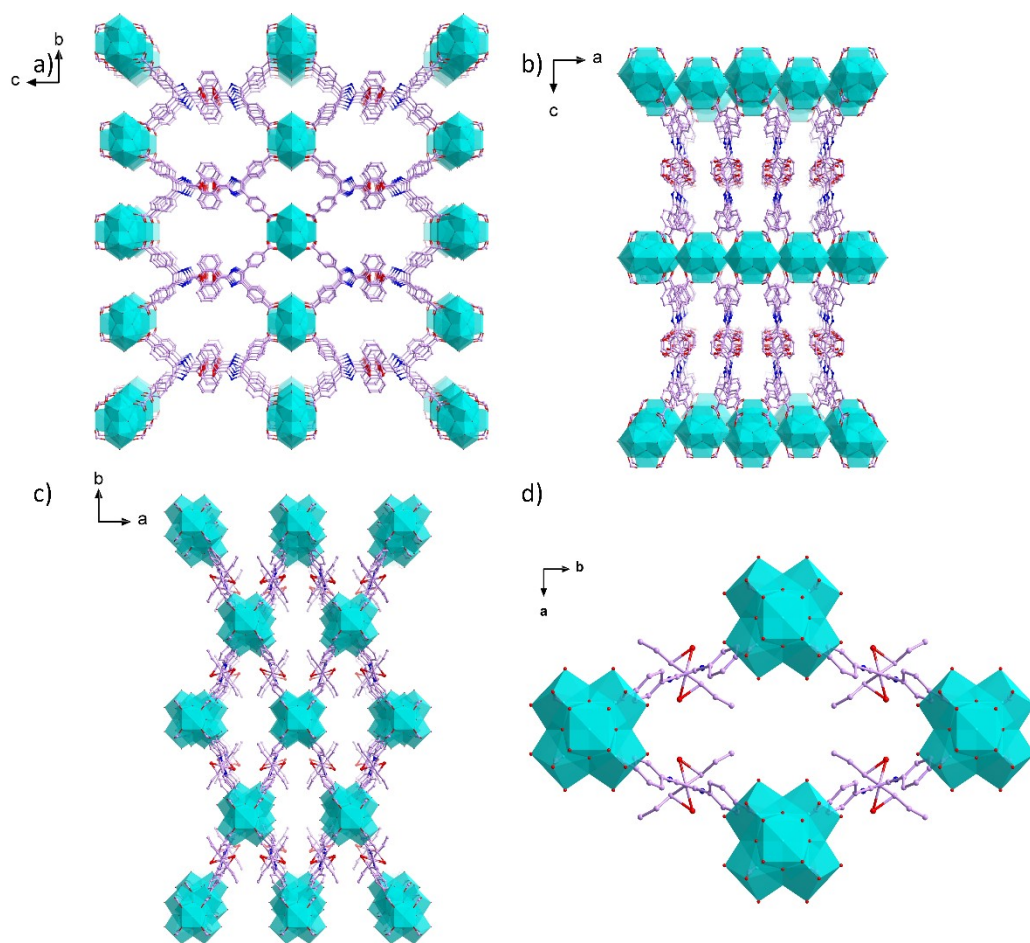

**Figure S7.** (a)-(c) The partial view of Zr-MOF-hv 10min porous structure from three directions; (d) Zr-MOF-hv 10 min pore diagram.

**Table S5. Crystal data and structure refinement for Zr-MOF-hv 10min.**

| Identification code | Zr-MOF-hv10min              |
|---------------------|-----------------------------|
| Empirical formula   | $C_{48}H_{24}N_4O_{20}Zr_3$ |
| Formula weight      | 1250.37                     |
| Temperature/K       | 100                         |
| Crystal system      | orthorhombic                |
| Space group         | Cmmm                        |
| a/Å                 | 14.612(6)                   |
| b/Å                 | 26.601(14)                  |

|                                                |                                                               |
|------------------------------------------------|---------------------------------------------------------------|
| $c/\text{\AA}$                                 | 24.698(10)                                                    |
| $\alpha/^\circ$                                | 90                                                            |
| $\beta/^\circ$                                 | 90                                                            |
| $\gamma/^\circ$                                | 90                                                            |
| Volume/ $\text{\AA}^3$                         | 9600(7)                                                       |
| Z                                              | 4                                                             |
| $\rho_{\text{calc}}/\text{g/cm}^3$             | 0.865                                                         |
| $\mu/\text{mm}^{-1}$                           | 0.363                                                         |
| F(000)                                         | 2480.0                                                        |
| Radiation                                      | CuK $_{\alpha}$ ( $\lambda = 1.54178$ )                       |
| 2 $\Theta$ range for data collection/ $^\circ$ | 3.18 to 31.666                                                |
| Index ranges                                   | $-11 \leq h \leq 11, -20 \leq k \leq 20, -18 \leq l \leq 18$  |
| Reflections collected                          | 16900                                                         |
| Independent reflections                        | 1304 [ $R_{\text{int}} = 0.1445, R_{\text{sigma}} = 0.0628$ ] |
| Data/restraints/parameters                     | 1304/259/181                                                  |
| Goodness-of-fit on $F^2$                       | 1.075                                                         |
| Final R indexes [ $I \geq 2\sigma(I)$ ]        | $R_1 = 0.0982, wR_2 = 0.2734$                                 |
| Final R indexes [all data]                     | $R_1 = 0.1161, wR_2 = 0.2962$                                 |
| Largest diff. peak/hole / $e \text{\AA}^{-3}$  | 0.86/-0.74                                                    |

---

**Table S6.** Bond Lengths for Zr-MOF-hv 10min.

| Atom Atom Length/Å |                   |           | Atom Atom Length/Å |                  |           |
|--------------------|-------------------|-----------|--------------------|------------------|-----------|
| Zr01               | Zr02              | 3.499(3)  | O2                 | C1               | 1.300(19) |
| Zr01               | Zr02 <sup>1</sup> | 3.499(3)  | N1                 | C9               | 1.394(15) |
| Zr01               | Zr02 <sup>2</sup> | 3.499(3)  | N1                 | C8               | 1.486(19) |
| Zr01               | Zr02 <sup>3</sup> | 3.499(3)  | C4                 | C5               | 1.31(2)   |
| Zr01               | O1                | 2.203(11) | C4                 | C3               | 1.384(19) |
| Zr01               | O1 <sup>3</sup>   | 2.203(11) | C2                 | C7               | 1.322(19) |
| Zr01               | O1 <sup>4</sup>   | 2.203(11) | C2                 | C1               | 1.488(15) |
| Zr01               | O1 <sup>5</sup>   | 2.203(11) | C2                 | C3               | 1.41(2)   |
| Zr01               | O4 <sup>5</sup>   | 2.197(17) | C7                 | C6               | 1.315(19) |
| Zr01               | O4                | 2.196(17) | C5                 | C6               | 1.46(2)   |
| Zr01               | O3 <sup>5</sup>   | 2.192(16) | C5                 | C8               | 1.49(2)   |
| Zr01               | O3                | 2.192(16) | C10                | C9               | 1.30(3)   |
| Zr02               | Zr02 <sup>1</sup> | 3.532(7)  | C10                | O7               | 1.30(3)   |
| Zr02               | Zr02 <sup>3</sup> | 3.544(6)  | C10                | O7 <sup>7</sup>  | 1.30(3)   |
| Zr02               | O5                | 2.235(17) | C10                | C11 <sup>7</sup> | 1.480(17) |
| Zr02               | O6                | 2.223(18) | C10                | C11              | 1.480(17) |
| Zr02               | O2 <sup>5</sup>   | 2.304(12) | O7                 | C11 <sup>7</sup> | 1.87(4)   |
| Zr02               | O2 <sup>2</sup>   | 2.304(12) | O7                 | C11              | 1.47(3)   |
| Zr02               | O4 <sup>6</sup>   | 2.141(9)  | C12                | C13              | 1.414(19) |
| Zr02               | O4                | 2.141(9)  | C12                | C11              | 1.449(19) |
| Zr02               | O3                | 2.134(10) | C13                | C13 <sup>8</sup> | 1.51(2)   |
| Zr02               | O3 <sup>6</sup>   | 2.134(10) | C11                | C11 <sup>8</sup> | 1.48(2)   |
| O1                 | C1                | 1.214(18) | C8                 | C8 <sup>7</sup>  | 1.28(3)   |

**Asymmetric code:** <sup>1</sup>1-X,+Y,1-Z; <sup>2</sup>1-X,1-Y,1-Z; <sup>3</sup>+X,1-Y,+Z; <sup>4</sup>1-X,+Y,+Z; <sup>5</sup>1-X,1-Y,+Z; <sup>6</sup>+X,+Y,1-Z; <sup>7</sup>3/2-X,3/2-Y,+Z;

<sup>8</sup>+X,+Y,2-Z

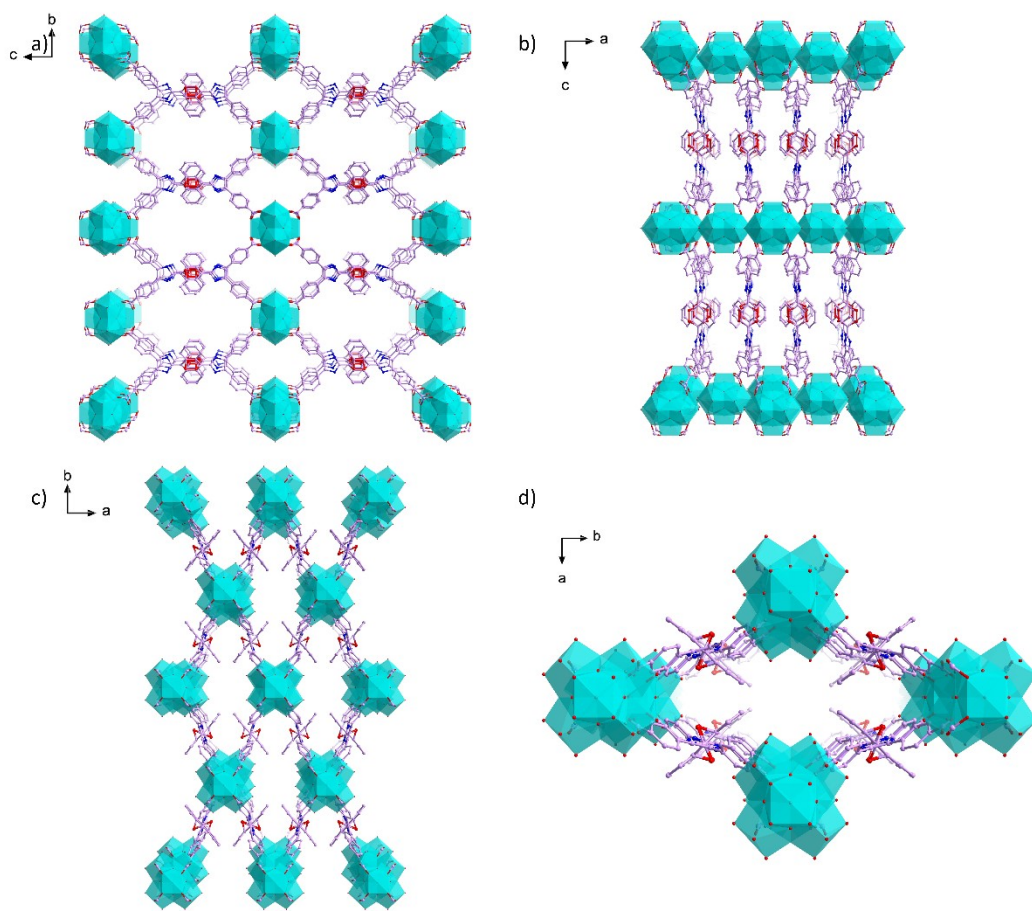

**Figure S8.** (a)-(c) The partial view of Zr-MOF-hv 20min porous structure from three directions; (d) Zr-MOF-hv 20 min pore diagram.

**Table S7.** Crystal data and structure refinement for Zr-MOF-hv 20min.

| Identification code | Zr-MOF-hv20min              |
|---------------------|-----------------------------|
| Empirical formula   | $C_{48}H_{24}N_4O_{20}Zr_3$ |
| Formula weight      | 1250.37                     |
| Temperature/K       | 100                         |
| Crystal system      | orthorhombic                |
| Space group         | Cmmm                        |
| a/Å                 | 14.117(3)                   |
| b/Å                 | 26.646(6)                   |
| c/Å                 | 24.669(5)                   |

|                                                |                                                               |
|------------------------------------------------|---------------------------------------------------------------|
| $\alpha/^\circ$                                | 90                                                            |
| $\beta/^\circ$                                 | 90                                                            |
| $\gamma/^\circ$                                | 90                                                            |
| Volume/ $\text{\AA}^3$                         | 9280(4)                                                       |
| Z                                              | 4                                                             |
| $\rho_{\text{calc}}/\text{g}/\text{cm}^3$      | 0.895                                                         |
| $\mu/\text{mm}^{-1}$                           | 0.375                                                         |
| F(000)                                         | 2480.0                                                        |
| Radiation                                      | CuK $_{\alpha}$ ( $\lambda = 1.54178$ )                       |
| 2 $\Theta$ range for data collection/ $^\circ$ | 3.056 to 41.654                                               |
| Index ranges                                   | $-14 \leq h \leq 14, -26 \leq k \leq 26, -24 \leq l \leq 24$  |
| Reflections collected                          | 35617                                                         |
| Independent reflections                        | 2682 [ $R_{\text{int}} = 0.1731, R_{\text{sigma}} = 0.0706$ ] |
| Data/restraints/parameters                     | 2682/100/181                                                  |
| Goodness-of-fit on $F^2$                       | 1.244                                                         |
| Final R indexes [ $I \geq 2\sigma(I)$ ]        | $R_1 = 0.1097, wR_2 = 0.3202$                                 |
| Final R indexes [all data]                     | $R_1 = 0.1456, wR_2 = 0.3575$                                 |
| Largest diff. peak/hole / $e \text{\AA}^{-3}$  | 0.96/-0.83                                                    |

---

**Table S8.** Bond Lengths for Zr-MOF-hv 20min.

| Atom Atom Length/Å |                   |           | Atom Atom Length/Å |                  |           |
|--------------------|-------------------|-----------|--------------------|------------------|-----------|
| Zr01               | Zr02 <sup>1</sup> | 3.496(2)  | N1                 | C9               | 1.342(12) |
| Zr01               | Zr02 <sup>2</sup> | 3.496(2)  | N1                 | C8               | 1.463(14) |
| Zr01               | Zr02              | 3.496(2)  | C1                 | C2               | 1.470(16) |
| Zr01               | Zr02 <sup>3</sup> | 3.496(2)  | C10                | C9               | 1.35(2)   |
| Zr01               | O1 <sup>1</sup>   | 2.188(8)  | C10                | C11 <sup>7</sup> | 1.440(12) |
| Zr01               | O1 <sup>4</sup>   | 2.188(8)  | C10                | C11              | 1.440(12) |
| Zr01               | O1 <sup>5</sup>   | 2.188(8)  | C10                | O7               | 1.382(16) |
| Zr01               | O1                | 2.188(8)  | C10                | O7 <sup>7</sup>  | 1.382(16) |
| Zr01               | O3 <sup>4</sup>   | 2.182(15) | C5                 | C4               | 1.356(16) |
| Zr01               | O3                | 2.182(15) | C5                 | C6               | 1.419(17) |
| Zr01               | O4 <sup>4</sup>   | 2.195(11) | C5                 | C8               | 1.436(15) |
| Zr01               | O4                | 2.195(11) | C3                 | C2               | 1.350(19) |
| Zr02               | Zr02 <sup>1</sup> | 3.535(3)  | C3                 | C4               | 1.343(16) |
| Zr02               | Zr02 <sup>3</sup> | 3.526(6)  | C2                 | C7               | 1.459(18) |
| Zr02               | O6                | 2.196(10) | C7                 | C6               | 1.322(15) |
| Zr02               | O2 <sup>2</sup>   | 2.279(8)  | C8                 | C8 <sup>7</sup>  | 1.42(2)   |
| Zr02               | O2 <sup>4</sup>   | 2.279(8)  | C11                | C11 <sup>8</sup> | 1.447(18) |
| Zr02               | O5                | 2.205(16) | C11                | C12              | 1.442(16) |
| Zr02               | O3                | 2.138(6)  | C11                | O7               | 1.52(3)   |
| Zr02               | O3 <sup>6</sup>   | 2.138(6)  | C11                | O7 <sup>7</sup>  | 1.91(3)   |
| Zr02               | O4                | 2.145(7)  | C13                | C13 <sup>8</sup> | 1.462(18) |
| Zr02               | O4 <sup>6</sup>   | 2.145(7)  | C13                | C12              | 1.427(16) |
| O1                 | C1                | 1.256(14) | O7                 | O7 <sup>8</sup>  | 1.67(4)   |
| O2                 | C1                | 1.266(13) |                    |                  |           |

**Asymmetric code:** <sup>1</sup>+X,1-Y,+Z; <sup>2</sup>1-X,1-Y,1-Z; <sup>3</sup>1-X,+Y,1-Z; <sup>4</sup>1-X,1-Y,+Z; <sup>5</sup>1-X,+Y,+Z; <sup>6</sup>+X,+Y,1-Z; <sup>7</sup>1/2-X,1/2-Y,+Z; <sup>8</sup>+X,+Y,-

Z

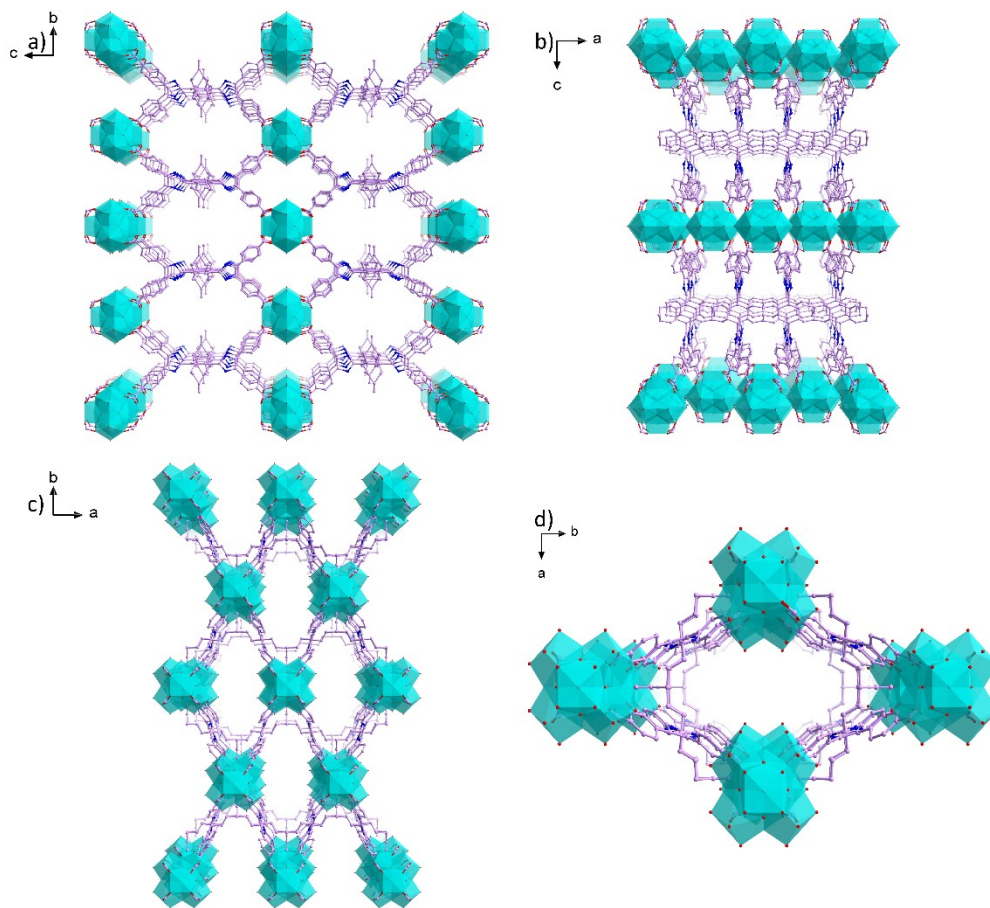

**Figure S9.** (a)-(c) The partial view of Zr-MOF-hv 30min porous structure from three directions; (d) Zr-MOF-hv 30 min pore diagram.

**Table S9.** Crystal data and structure refinement for Zr-MOF-hv 30min.

| Identification code | Zr-MOF-hv 30min             |
|---------------------|-----------------------------|
| Empirical formula   | $C_{48}H_{24}N_4O_{20}Zr_3$ |
| Formula weight      | 1250.37                     |
| Temperature/K       | 100                         |
| Crystal system      | orthorhombic                |
| Space group         | Cmmm                        |
| $a/\text{\AA}$      | 14.118(7)                   |
| $b/\text{\AA}$      | 26.830(12)                  |
| $c/\text{\AA}$      | 24.693(10)                  |
| $\alpha/^\circ$     | 90                          |



|                                               |                                                               |
|-----------------------------------------------|---------------------------------------------------------------|
| $\beta/^\circ$                                | 90                                                            |
| $\gamma/^\circ$                               | 90                                                            |
| Volume/ $\text{\AA}^3$                        | 9354(7)                                                       |
| Z                                             | 4                                                             |
| $\rho_{\text{calc}}/\text{g/cm}^3$            | 0.888                                                         |
| $\mu/\text{mm}^{-1}$                          | 0.372                                                         |
| F(000)                                        | 2480.0                                                        |
| Radiation                                     | CuK $_{\alpha}$ ( $\lambda = 1.54178$ )                       |
| $2\Theta$ range for data collection/ $^\circ$ | 3.26 to 33.036                                                |
| Index ranges                                  | $-11 \leq h \leq 11, -21 \leq k \leq 21, -19 \leq l \leq 19$  |
| Reflections collected                         | 17822                                                         |
| Independent reflections                       | 1365 [ $R_{\text{int}} = 0.1764, R_{\text{sigma}} = 0.0839$ ] |
| Data/restraints/parameters                    | 1365/184/184                                                  |
| Goodness-of-fit on $F^2$                      | 1.372                                                         |
| Final R indexes [ $I \geq 2\sigma(I)$ ]       | $R_1 = 0.1348, wR_2 = 0.3249$                                 |
| Final R indexes [all data]                    | $R_1 = 0.1571, wR_2 = 0.3450$                                 |
| Largest diff. peak/hole / $e \text{\AA}^{-3}$ | 1.40/-1.20                                                    |

---

**Table S10.** Bond Lengths for Zr-MOF-hv 30min.

| Atom Atom Length/Å |                   |           | Atom Atom Length/Å |                   |           |
|--------------------|-------------------|-----------|--------------------|-------------------|-----------|
| Zr01               | Zr01 <sup>1</sup> | 3.557(6)  | C10                | O7                | 1.29(6)   |
| Zr01               | Zr01 <sup>2</sup> | 3.528(8)  | C10                | O7 <sup>7</sup>   | 1.29(6)   |
| Zr01               | Zr02              | 3.498(3)  | O2                 | C1                | 1.275(15) |
| Zr01               | Zr02 <sup>3</sup> | 3.499(3)  | C8                 | C8 <sup>7</sup>   | 1.439(18) |
| Zr01               | O5                | 2.10(2)   | C8                 | C5                | 1.403(14) |
| Zr01               | O6                | 2.157(18) | C8                 | N1                | 1.454(14) |
| Zr01               | O2 <sup>3</sup>   | 2.287(14) | C3                 | C2                | 1.34(2)   |
| Zr01               | O2 <sup>4</sup>   | 2.287(14) | C3                 | C4                | 1.37(2)   |
| Zr01               | O3                | 2.139(10) | C2                 | C1                | 1.466(18) |
| Zr01               | O3 <sup>5</sup>   | 2.139(10) | C2                 | C7                | 1.440(17) |
| Zr01               | O4 <sup>5</sup>   | 2.116(13) | C9                 | N1 <sup>7</sup>   | 1.447(18) |
| Zr01               | O4                | 2.116(13) | C9                 | N1                | 1.447(18) |
| Zr02               | O1 <sup>4</sup>   | 2.231(14) | C7                 | C6                | 1.415(19) |
| Zr02               | O1 <sup>1</sup>   | 2.231(14) | C6                 | C5                | 1.429(16) |
| Zr02               | O1 <sup>6</sup>   | 2.231(14) | C4                 | C5                | 1.41(2)   |
| Zr02               | O1                | 2.231(14) | C11                | C11 <sup>8</sup>  | 1.49(2)   |
| Zr02               | O3 <sup>4</sup>   | 2.23(2)   | C11                | O7 <sup>7</sup>   | 1.49(5)   |
| Zr02               | O3                | 2.23(2)   | C11                | C12               | 1.40(2)   |
| Zr02               | O4                | 2.172(18) | C13                | C13 <sup>9</sup>  | 1.484(19) |
| Zr02               | O4 <sup>4</sup>   | 2.172(18) | C13                | C14               | 1.503(17) |
| O1                 | C1                | 1.17(2)   | C13                | C12 <sup>10</sup> | 1.445(13) |
| C10                | C9                | 1.438(19) | C13                | C12               | 1.445(13) |
| C10                | C11 <sup>7</sup>  | 1.465(16) | C14                | C14 <sup>9</sup>  | 1.45(2)   |
| C10                | C11               | 1.465(16) | O7                 | O7 <sup>8</sup>   | 1.64(9)   |

**Asymmetric code:** <sup>1</sup>+X,1-Y,+Z; <sup>2</sup>1-X,+Y,1-Z; <sup>3</sup>1-X,1-Y,1-Z; <sup>4</sup>1-X,1-Y,+Z; <sup>5</sup>+X,+Y,1-Z; <sup>6</sup>1-X,+Y,+Z; <sup>7</sup>1/2-X,1/2-Y,+Z; <sup>8</sup>+X,+Y,-

Z; <sup>9</sup>-X,+Y,-Z; <sup>10</sup>-X,+Y,+Z

**Table S11.** Crystal data and structure refinement for Zr-MOF-hv40min.

| Identification code                         | Zr-MOF-hv40min                                                                 |
|---------------------------------------------|--------------------------------------------------------------------------------|
| Empirical formula                           | C <sub>48</sub> H <sub>24</sub> N <sub>4</sub> O <sub>20</sub> Zr <sub>3</sub> |
| Formula weight                              | 1250.37                                                                        |
| Temperature/K                               | 100                                                                            |
| Crystal system                              | orthorhombic                                                                   |
| Space group                                 | Cmmm                                                                           |
| a/Å                                         | 13.994(10)                                                                     |
| b/Å                                         | 26.939(17)                                                                     |
| c/Å                                         | 24.532(14)                                                                     |
| $\alpha$ /°                                 | 90                                                                             |
| $\beta$ /°                                  | 90                                                                             |
| $\gamma$ /°                                 | 90                                                                             |
| Volume/Å <sup>3</sup>                       | 9248(10)                                                                       |
| Z                                           | 4                                                                              |
| $\rho_{\text{calc}}/\text{cm}^3$            | 0.898                                                                          |
| $\mu/\text{mm}^{-1}$                        | 0.377                                                                          |
| F(000)                                      | 2480.0                                                                         |
| Radiation                                   | CuK $\alpha$ ( $\lambda = 1.54178$ )                                           |
| 2 $\Theta$ range for data collection/°      | 3.024 to 35.982                                                                |
| Index ranges                                | -12 $\leq$ h $\leq$ 12, -23 $\leq$ k $\leq$ 23, -21 $\leq$ l $\leq$ 21         |
| Reflections collected                       | 22018                                                                          |
| Independent reflections                     | 1651 [ $R_{\text{int}} = 0.2546$ , $R_{\text{sigma}} = 0.1799$ ]               |
| Data/restraints/parameters                  | 1651/303/184                                                                   |
| Goodness-of-fit on F <sup>2</sup>           | 1.264                                                                          |
| Final R indexes [ $I \geq 2\sigma(I)$ ]     | $R_1 = 0.1577$ , $wR_2 = 0.3470$                                               |
| Final R indexes [all data]                  | $R_1 = 0.2060$ , $wR_2 = 0.4023$                                               |
| Largest diff. peak/hole / e Å <sup>-3</sup> | 1.87/-0.91                                                                     |

**Table S12.** Bond Lengths for Zr-MOF-hv40min.

| Atom Atom Length/Å |                   |           | Atom Atom Length/Å |                  |           |
|--------------------|-------------------|-----------|--------------------|------------------|-----------|
| Zr01               | Zr02              | 3.496(4)  | C7                 | C6               | 1.407(17) |
| Zr01               | Zr02 <sup>1</sup> | 3.496(4)  | C10                | C9               | 1.283(17) |
| Zr01               | Zr02 <sup>2</sup> | 3.496(4)  | C10                | C11              | 1.581(10) |
| Zr01               | Zr02 <sup>3</sup> | 3.496(4)  | C10                | C11 <sup>7</sup> | 1.581(10) |
| Zr01               | O1 <sup>4</sup>   | 2.179(12) | C10                | O7 <sup>7</sup>  | 1.653(11) |
| Zr01               | O1                | 2.179(12) | C10                | O7               | 1.653(11) |
| Zr01               | O1 <sup>5</sup>   | 2.179(12) | N1                 | C8               | 1.44(3)   |
| Zr01               | O1 <sup>1</sup>   | 2.179(12) | N1                 | C9               | 1.378(19) |
| Zr01               | O3                | 2.18(2)   | C4                 | C5               | 1.32(3)   |
| Zr01               | O3 <sup>5</sup>   | 2.18(2)   | C4                 | C3               | 1.39(3)   |
| Zr01               | O4 <sup>5</sup>   | 2.138(18) | C2                 | C3               | 1.43(2)   |
| Zr01               | O4                | 2.137(18) | C2                 | C1               | 1.53(2)   |
| Zr02               | Zr02 <sup>3</sup> | 3.518(10) | C5                 | C6               | 1.47(3)   |
| Zr02               | Zr02 <sup>1</sup> | 3.540(6)  | C5                 | C8               | 1.53(3)   |
| Zr02               | O5                | 2.09(3)   | C8                 | C8 <sup>7</sup>  | 1.32(4)   |
| Zr02               | O6                | 2.158(15) | C11                | C11 <sup>8</sup> | 1.58(2)   |
| Zr02               | O2 <sup>2</sup>   | 2.271(14) | C11                | O7               | 1.518(19) |
| Zr02               | O2 <sup>5</sup>   | 2.271(14) | C11                | C12              | 1.426(18) |
| Zr02               | O3 <sup>6</sup>   | 2.119(7)  | O7                 | O7 <sup>8</sup>  | 1.294(19) |
| Zr02               | O3                | 2.119(7)  | C13                | C13 <sup>9</sup> | 1.51(2)   |
| Zr02               | O4 <sup>6</sup>   | 2.171(12) | C13                | C12 <sup>4</sup> | 1.462(19) |
| Zr02               | O4                | 2.171(12) | C13                | C12              | 1.462(19) |
| O1                 | C1                | 1.24(2)   | C13                | C14              | 1.57(3)   |
| O2                 | C1                | 1.31(3)   | C14                | C14 <sup>9</sup> | 1.49(2)   |
| C7                 | C2                | 1.33(2)   |                    |                  |           |

**Asymmetric code:** <sup>1</sup>+X,1-Y,+Z; <sup>2</sup>1-X,1-Y,-Z; <sup>3</sup>1-X,+Y,-Z; <sup>4</sup>1-X,+Y,+Z; <sup>5</sup>1-X,1-Y,+Z; <sup>6</sup>+X,+Y,-Z; <sup>7</sup>3/2-X,3/2-Y,+Z; <sup>8</sup>+X,+Y,1-Z;

<sup>9</sup>1-X,+Y,1-Z

**Table S13.** Crystal data and structure refinement for Zr-MOF-hv 50min.

| Identification code                         | Zr-MOF-hv50min                                                                 |
|---------------------------------------------|--------------------------------------------------------------------------------|
| Empirical formula                           | C <sub>48</sub> H <sub>24</sub> N <sub>4</sub> O <sub>20</sub> Zr <sub>3</sub> |
| Formula weight                              | 1250.37                                                                        |
| Temperature/K                               | 100                                                                            |
| Crystal system                              | orthorhombic                                                                   |
| Space group                                 | Cmmm                                                                           |
| a/Å                                         | 14.118(7)                                                                      |
| b/Å                                         | 26.830(12)                                                                     |
| c/Å                                         | 24.693(10)                                                                     |
| α/°                                         | 90                                                                             |
| β/°                                         | 90                                                                             |
| γ/°                                         | 90                                                                             |
| Volume/Å <sup>3</sup>                       | 9354(7)                                                                        |
| Z                                           | 4                                                                              |
| ρ <sub>calc</sub> /cm <sup>3</sup>          | 0.888                                                                          |
| μ/mm <sup>-1</sup>                          | 0.372                                                                          |
| F(000)                                      | 2480.0                                                                         |
| Radiation                                   | CuK <sub>α</sub> (λ = 1.54178)                                                 |
| 2θ range for data collection/°              | 3.26 to 33.036                                                                 |
| Index ranges                                | -11 ≤ h ≤ 11, -21 ≤ k ≤ 21, -19 ≤ l ≤ 19                                       |
| Reflections collected                       | 17822                                                                          |
| Independent reflections                     | 1365 [R <sub>int</sub> = 0.1764, R <sub>sigma</sub> = 0.0839]                  |
| Data/restraints/parameters                  | 1365/184/184                                                                   |
| Goodness-of-fit on F <sup>2</sup>           | 1.372                                                                          |
| Final R indexes [I ≥ 2σ (I)]                | R <sub>1</sub> = 0.1348, wR <sub>2</sub> = 0.3249                              |
| Final R indexes [all data]                  | R <sub>1</sub> = 0.1571, wR <sub>2</sub> = 0.3450                              |
| Largest diff. peak/hole / e Å <sup>-3</sup> | 1.40/-1.20                                                                     |

**Table S14.** Bond Lengths for Zr-MOF-hv 50min.

| Atom Atom Length/Å |                   |           | Atom Atom Length/Å |                   |           |
|--------------------|-------------------|-----------|--------------------|-------------------|-----------|
| Zr01               | Zr01 <sup>1</sup> | 3.557(6)  | C10                | O7                | 1.29(6)   |
| Zr01               | Zr01 <sup>2</sup> | 3.528(8)  | C10                | O7 <sup>7</sup>   | 1.29(6)   |
| Zr01               | Zr02              | 3.498(3)  | O2                 | C1                | 1.275(15) |
| Zr01               | Zr02 <sup>3</sup> | 3.499(3)  | C8                 | C8 <sup>7</sup>   | 1.439(18) |
| Zr01               | O5                | 2.10(2)   | C8                 | C5                | 1.403(14) |
| Zr01               | O6                | 2.157(18) | C8                 | N1                | 1.454(14) |
| Zr01               | O2 <sup>3</sup>   | 2.287(14) | C3                 | C2                | 1.34(2)   |
| Zr01               | O2 <sup>4</sup>   | 2.287(14) | C3                 | C4                | 1.37(2)   |
| Zr01               | O3                | 2.139(10) | C2                 | C1                | 1.466(18) |
| Zr01               | O3 <sup>5</sup>   | 2.139(10) | C2                 | C7                | 1.440(17) |
| Zr01               | O4 <sup>5</sup>   | 2.116(13) | C9                 | N1 <sup>7</sup>   | 1.447(18) |
| Zr01               | O4                | 2.116(13) | C9                 | N1                | 1.447(18) |
| Zr02               | O1 <sup>4</sup>   | 2.231(14) | C7                 | C6                | 1.415(19) |
| Zr02               | O1 <sup>1</sup>   | 2.231(14) | C6                 | C5                | 1.429(16) |
| Zr02               | O1 <sup>6</sup>   | 2.231(14) | C4                 | C5                | 1.41(2)   |
| Zr02               | O1                | 2.231(14) | C11                | C11 <sup>8</sup>  | 1.49(2)   |
| Zr02               | O3 <sup>4</sup>   | 2.23(2)   | C11                | O7 <sup>7</sup>   | 1.49(5)   |
| Zr02               | O3                | 2.23(2)   | C11                | C12               | 1.40(2)   |
| Zr02               | O4                | 2.172(18) | C13                | C13 <sup>9</sup>  | 1.484(19) |
| Zr02               | O4 <sup>4</sup>   | 2.172(18) | C13                | C14               | 1.503(17) |
| O1                 | C1                | 1.17(2)   | C13                | C12 <sup>10</sup> | 1.445(13) |
| C10                | C9                | 1.438(19) | C13                | C12               | 1.445(13) |
| C10                | C11 <sup>7</sup>  | 1.465(16) | C14                | C14 <sup>9</sup>  | 1.45(2)   |
| C10                | C11               | 1.465(16) | O7                 | O7 <sup>8</sup>   | 1.64(9)   |

**Asymmetric code:** <sup>1</sup>+X,1-Y,+Z; <sup>2</sup>1-X,+Y,1-Z; <sup>3</sup>1-X,1-Y,1-Z; <sup>4</sup>1-X,1-Y,+Z; <sup>5</sup>+X,+Y,1-Z; <sup>6</sup>1-X,+Y,+Z; <sup>7</sup>1/2-X,1/2-Y,+Z; <sup>8</sup>+X,+Y,-

Z; <sup>9</sup>-X,+Y,-Z; <sup>10</sup>-X,+Y,+Z

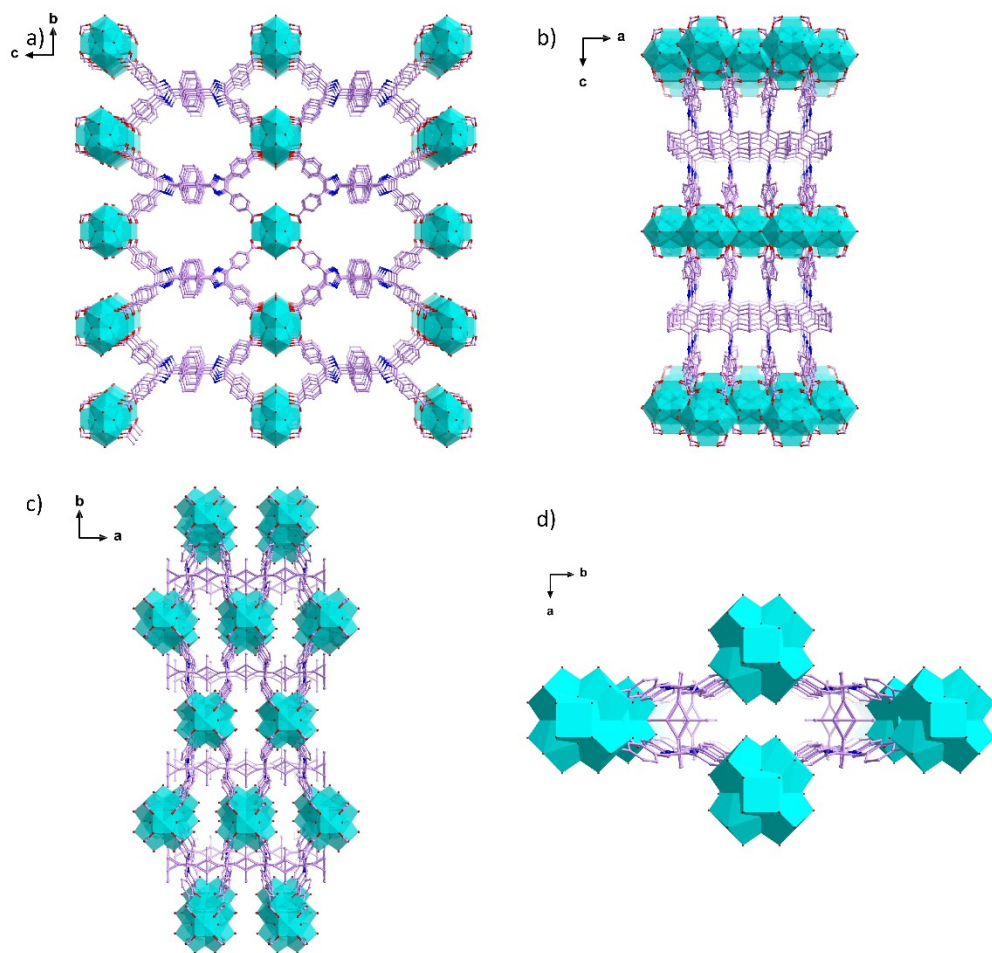

**Figure S10.** (a)-(c) The partial view of Zr-MOF-hv 120min porous structure from three directions; (d) Zr-MOF-hv 120 min pore diagram.

**Table S15.** Crystal data and structure refinement for Zr-MOF-hv120min.

| Identification code | Zr-MOF-hv120min             |
|---------------------|-----------------------------|
| Empirical formula   | $C_{48}H_{24}N_4O_{16}Zr_3$ |
| Formula weight      | 1186.37                     |
| Temperature/K       | 100                         |
| Crystal system      | orthorhombic                |
| Space group         | <i>Cmmm</i>                 |
| a/Å                 | 11.130(5)                   |
| b/Å                 | 27.452(10)                  |
| c/Å                 | 24.900(9)                   |

|                                                |                                                               |
|------------------------------------------------|---------------------------------------------------------------|
| $\alpha/^\circ$                                | 90                                                            |
| $\beta/^\circ$                                 | 90                                                            |
| $\gamma/^\circ$                                | 90                                                            |
| Volume/ $\text{\AA}^3$                         | 7608(5)                                                       |
| Z                                              | 4                                                             |
| $\rho_{\text{calc}}/\text{g}/\text{cm}^3$      | 1.029                                                         |
| $\mu/\text{mm}^{-1}$                           | 0.451                                                         |
| F(000)                                         | 2320.0                                                        |
| Radiation                                      | CuK $_{\alpha}$ ( $\lambda = 1.54178$ )                       |
| 2 $\Theta$ range for data collection/ $^\circ$ | 3.272 to 34.602                                               |
| Index ranges                                   | $-9 \leq h \leq 9, -22 \leq k \leq 22, -20 \leq l \leq 20$    |
| Reflections collected                          | 15165                                                         |
| Independent reflections                        | 1269 [ $R_{\text{int}} = 0.1815, R_{\text{sigma}} = 0.0816$ ] |
| Data/restraints/parameters                     | 1269/175/166                                                  |
| Goodness-of-fit on $F^2$                       | 1.771                                                         |
| Final R indexes [ $I \geq 2\sigma(I)$ ]        | $R_1 = 0.1797, wR_2 = 0.4565$                                 |
| Final R indexes [all data]                     | $R_1 = 0.2266, wR_2 = 0.5038$                                 |
| Largest diff. peak/hole / $e \text{\AA}^{-3}$  | 0.94/-0.70                                                    |

---



**Table S16.** Bond Lengths for Zr-MOF-hv120min.

| Atom Atom Length/Å |                  |           | Atom Atom Length/Å |                  |          |
|--------------------|------------------|-----------|--------------------|------------------|----------|
| Zr1                | Zr2 <sup>1</sup> | 3.600(11) | C10                | C9               | 1.42(2)  |
| Zr1                | Zr2              | 3.600(11) | C10                | C11              | 1.34(5)  |
| Zr1                | Zr2 <sup>2</sup> | 3.600(11) | C10                | C11 <sup>7</sup> | 1.34(5)  |
| Zr1                | Zr2 <sup>3</sup> | 3.600(11) | C9                 | N1 <sup>7</sup>  | 1.45(4)  |
| Zr1                | O4 <sup>4</sup>  | 2.37(5)   | C9                 | N1               | 1.45(4)  |
| Zr1                | O4 <sup>2</sup>  | 2.37(5)   | C1                 | C2               | 1.40(5)  |
| Zr1                | O5 <sup>5</sup>  | 2.15(3)   | C6                 | C5               | 1.3900   |
| Zr1                | O5               | 2.15(3)   | C6                 | C7               | 1.3900   |
| Zr1                | O5 <sup>3</sup>  | 2.15(3)   | C5                 | C4               | 1.3900   |
| Zr1                | O5 <sup>6</sup>  | 2.15(3)   | C5                 | C8               | 1.38(4)  |
| Zr1                | O3 <sup>5</sup>  | 2.09(9)   | C4                 | C3               | 1.3900   |
| Zr1                | O3               | 2.09(9)   | C3                 | C2               | 1.3900   |
| Zr2                | Zr2 <sup>1</sup> | 3.664(14) | C2                 | C7               | 1.3900   |
| Zr2                | O4 <sup>4</sup>  | 2.00(3)   | C8                 | C8 <sup>7</sup>  | 1.51(8)  |
| Zr2                | O4               | 2.00(3)   | C8                 | N1               | 1.49(4)  |
| Zr2                | O1 <sup>4</sup>  | 2.28(3)   | C11                | C11 <sup>8</sup> | 1.87(13) |
| Zr2                | O1               | 2.28(3)   | C11                | C13              | 1.83(2)  |
| Zr2                | O3 <sup>4</sup>  | 2.27(3)   | C11                | C14              | 1.88(2)  |
| Zr2                | O3               | 2.27(3)   | C12                | C12 <sup>8</sup> | 1.60(2)  |
| Zr2                | O6               | 2.21(2)   | C12                | C13              | 1.61(2)  |
| Zr2                | O2               | 2.251(18) | C15                | C15 <sup>8</sup> | 1.49(2)  |
| O4                 | O4 <sup>4</sup>  | 1.42(18)  | C15                | C14              | 1.58(2)  |
| O5                 | C1 <sup>1</sup>  | 1.40(5)   | C13                | C14              | 1.80(2)  |
| O1                 | C1               | 1.33(4)   |                    |                  |          |

**Asymmetric code:** <sup>1</sup>+X,1-Y,1-Z; <sup>2</sup>-X,1-Y,1-Z; <sup>3</sup>-X,+Y,+Z; <sup>4</sup>+X,+Y,1-Z; <sup>5</sup>-X,1-Y,+Z; <sup>6</sup>+X,1-Y,+Z; <sup>7</sup>1/2-X,3/2-Y,+Z; <sup>8</sup>+X,+Y,-Z

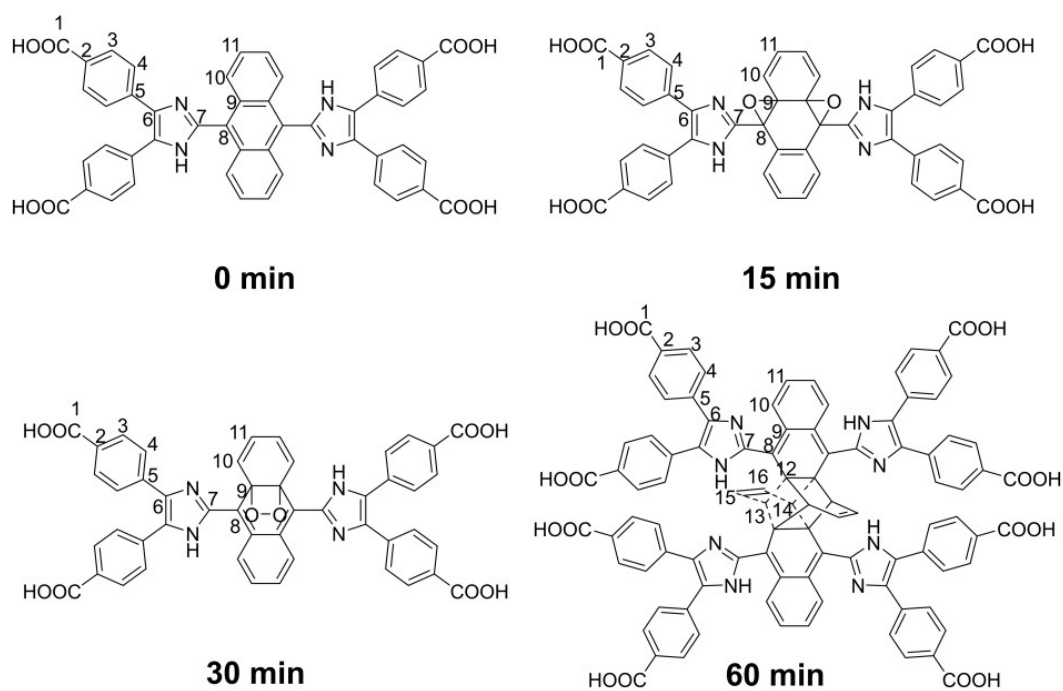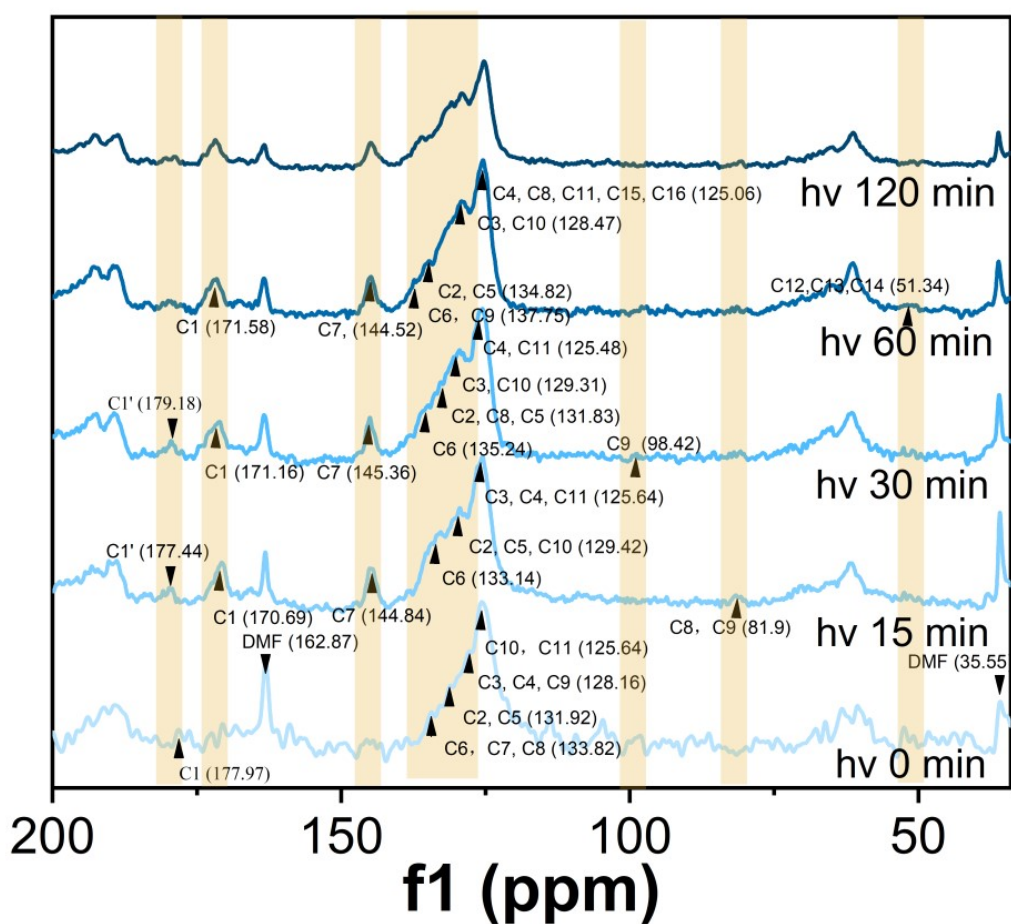

Figure S11. Solid  $^{13}\text{C}$  NMR spectra along with increasing light time

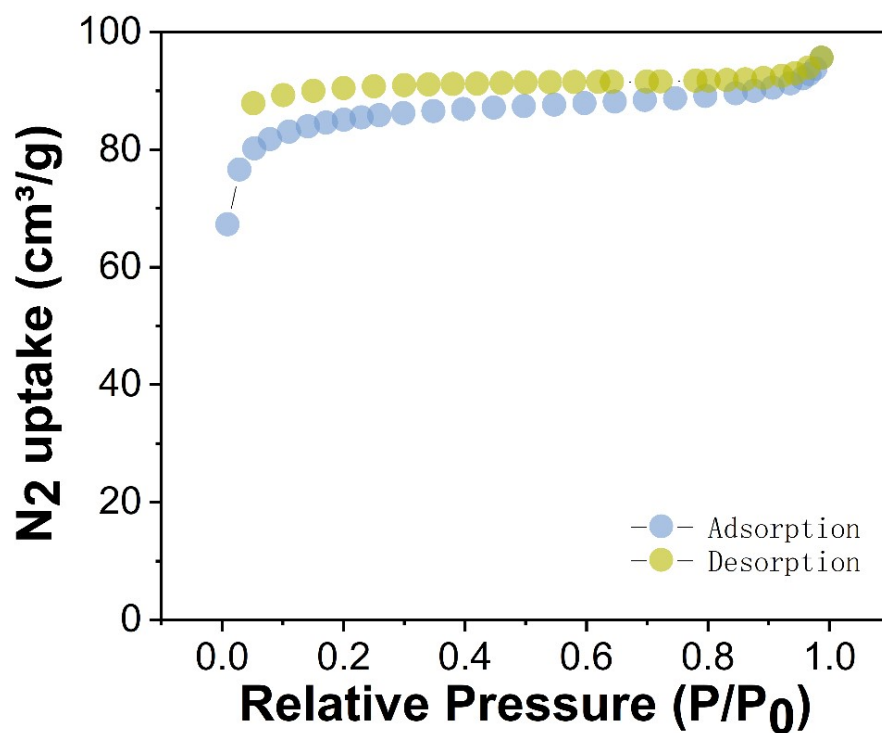

**Figure S12.** N<sub>2</sub> adsorption/desorption curves at 77K for Zr-MOF-*hν*

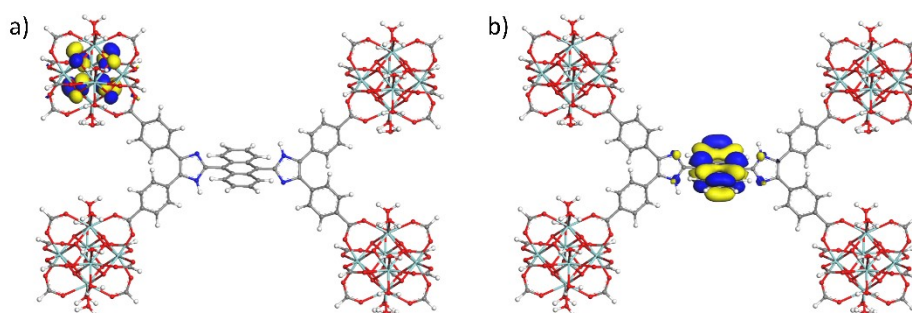

**Figure S13.** The distribution of HOMO orbital (a) and LUMO orbital (b) in Zr<sub>6</sub>-L

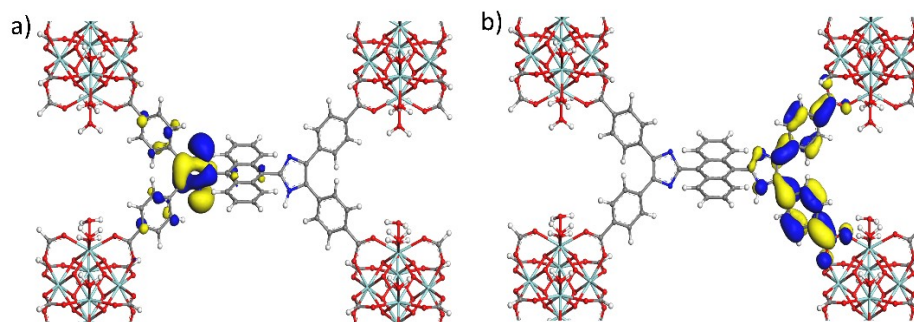

**Figure S14.** The distribution of HOMO orbital (a) and LUMO orbital (b) in Zr<sub>6</sub>-L-radical

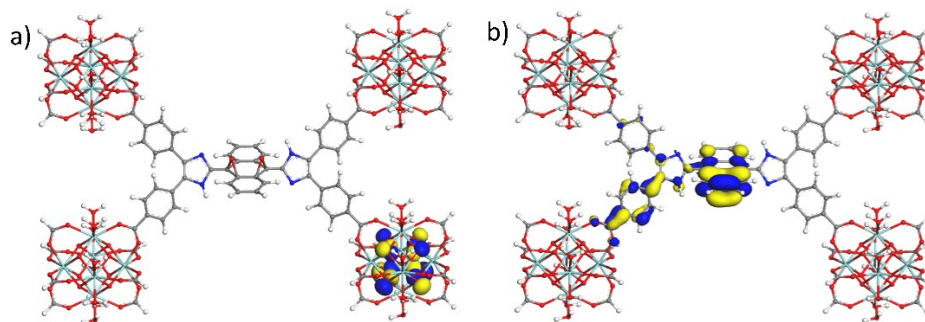

**Figure S15.** The distribution of HOMO orbital (a) and LUMO orbital (b) in  $Zr_6-L-O_2$

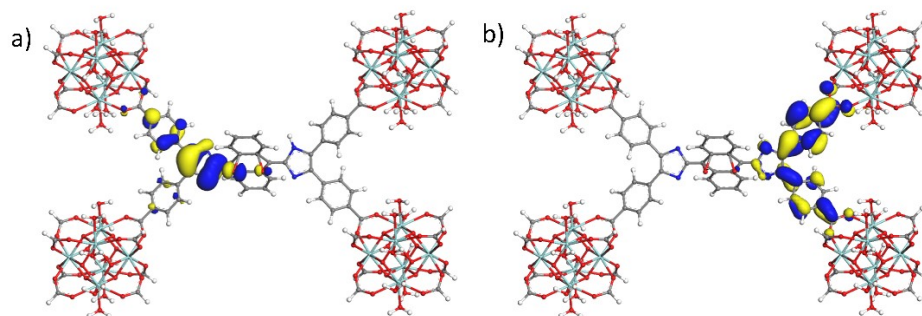

**Figure S16.** The distribution of HOMO orbital (a) and LUMO orbital (b) in  $Zr_6-L-O_2$ -radical

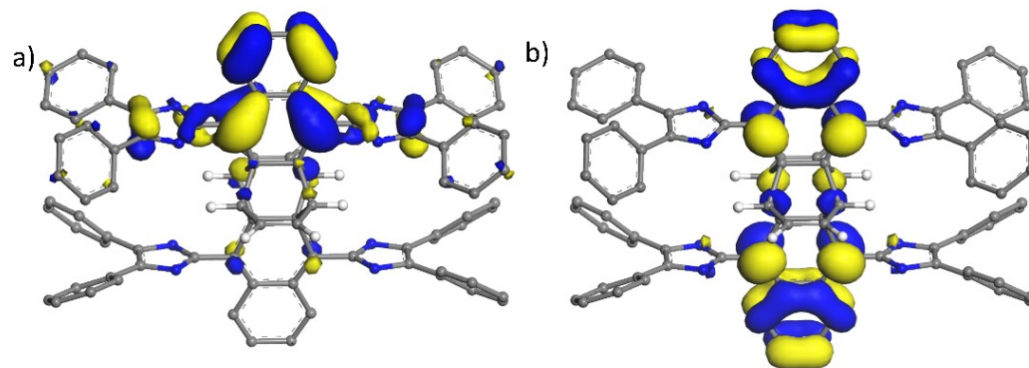

**Figure S17.** The distribution of HOMO orbital (a) and LUMO orbital (b) in  $Zr_6-L-hv$

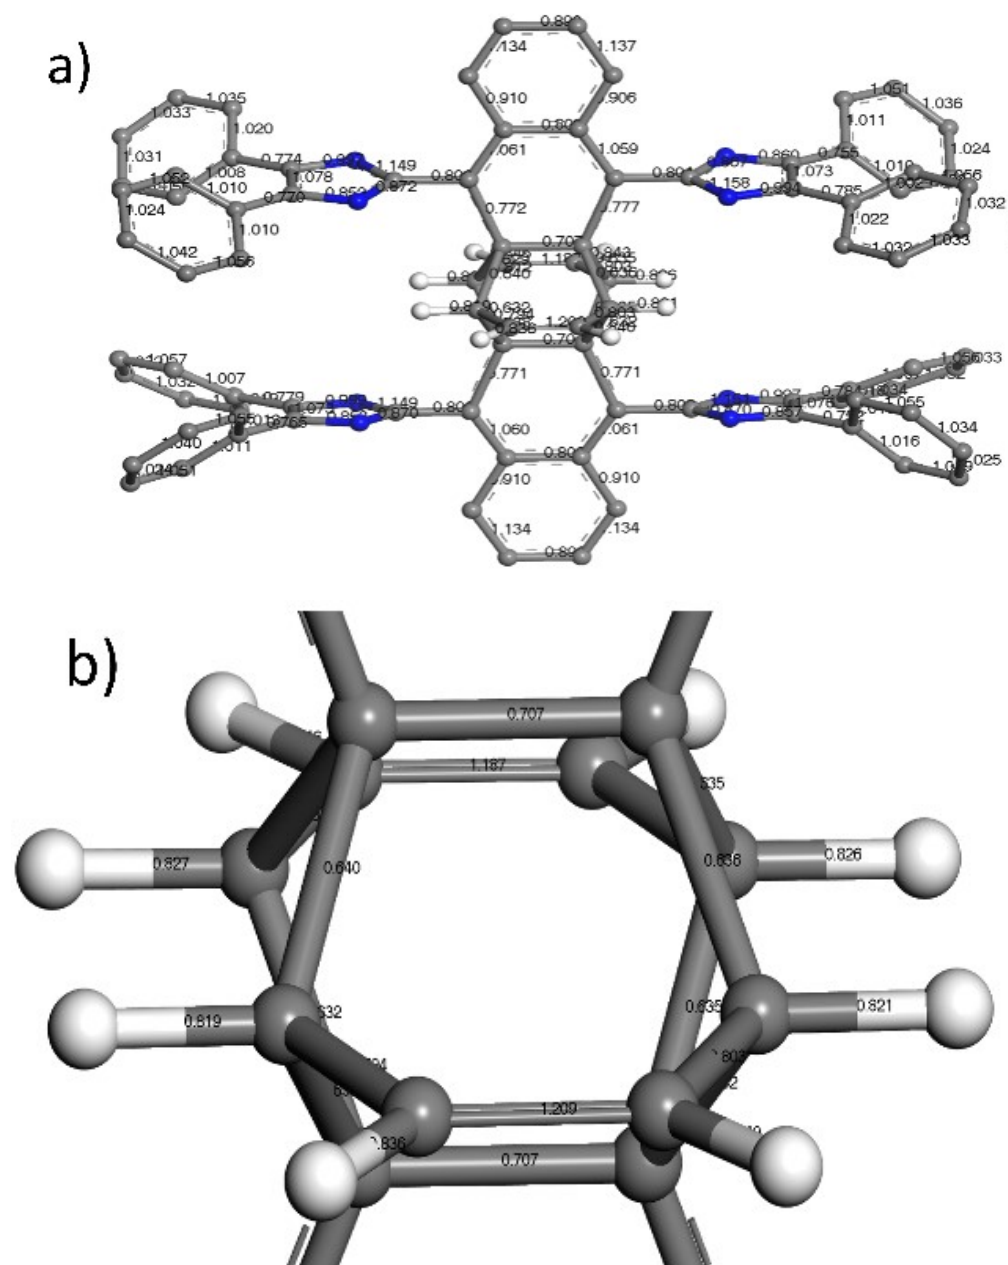

**Figure S18.** (a) the view of bond order for  $Zr_6$ -L-hv unit; b) the enlarged view of bond order for the central part of  $Zr_6$ -L-hv unit.

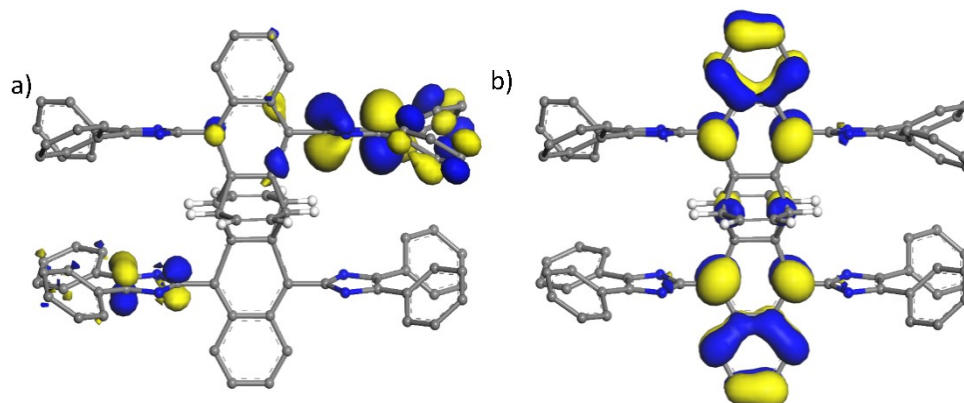

**Figure S19.** The distribution of HOMO orbital (a) and LUMO orbital (b) in Zr<sub>6</sub>-L-hv-biradical

**Table S17. The optimized Coordinates (Angstroms) for final two original units**

| ATOM |   | X         | Y         | Z         |
|------|---|-----------|-----------|-----------|
| 1    | N | 3.390478  | -1.119777 | -3.687068 |
| 2    | N | -3.420304 | -1.136094 | 3.674585  |
| 3    | N | 3.508908  | -0.940592 | 3.642603  |
| 4    | N | -3.549913 | -0.951334 | -3.626792 |
| 5    | N | 4.165668  | 0.958602  | -3.667428 |
| 6    | N | -4.204267 | 0.939297  | 3.680428  |
| 7    | N | 4.278627  | 1.138985  | 3.704001  |
| 8    | N | -4.347795 | 1.116470  | -3.714873 |
| 9    | C | 3.781469  | -0.066155 | -1.428660 |
| 10   | C | -3.834831 | -0.068925 | 1.429615  |
| 11   | C | 3.935281  | 0.110194  | 1.425715  |
| 12   | C | -4.012579 | 0.109394  | -1.424053 |
| 13   | C | 3.218599  | -1.544071 | -6.151992 |
| 14   | C | 3.561236  | -0.681376 | -4.983802 |
| 15   | C | -3.237820 | -1.601907 | 6.124749  |
| 16   | C | -3.587390 | -0.712972 | 4.978252  |
| 17   | C | 3.179336  | -1.548004 | 6.063747  |
| 18   | C | 3.589318  | -0.610025 | 4.981945  |
| 19   | C | -3.182924 | -1.574536 | -6.038082 |
| 20   | C | -3.612891 | -0.630914 | -4.969195 |
| 21   | C | 4.419713  | 1.537798  | -6.112570 |
| 22   | C | 4.050232  | 0.614247  | -4.999641 |
| 23   | C | -4.439196 | 1.498115  | 6.125805  |
| 24   | C | -4.081347 | 0.580740  | 5.009346  |
| 25   | C | 4.379722  | 1.553908  | 6.168644  |
| 26   | C | 4.077318  | 0.686224  | 4.992547  |
| 27   | C | -4.404865 | 1.517470  | -6.182566 |

|    |   |           |           |           |
|----|---|-----------|-----------|-----------|
| 28 | C | -4.115727 | 0.659646  | -4.996431 |
| 29 | C | 3.755320  | -0.110674 | -2.899537 |
| 30 | C | -3.792815 | -0.121320 | 2.899804  |
| 31 | C | 3.934706  | 0.138655  | 2.897723  |
| 32 | C | -4.000711 | 0.127537  | -2.895795 |
| 33 | C | 3.160407  | 1.014449  | -0.747748 |
| 34 | C | 2.375028  | 1.988865  | -1.438516 |
| 35 | H | 2.202381  | 1.864627  | -2.508849 |
| 36 | C | 1.788756  | 3.042604  | -0.780039 |
| 37 | H | 1.174492  | 3.757958  | -1.333928 |
| 38 | C | -3.248784 | 1.030044  | 0.746383  |
| 39 | C | -2.482604 | 2.024231  | 1.431930  |
| 40 | H | -2.284744 | 1.894912  | 2.497395  |
| 41 | C | -1.953381 | 3.107870  | 0.774577  |
| 42 | H | -1.359835 | 3.843088  | 1.324875  |
| 43 | C | 3.262942  | 1.121970  | 0.691892  |
| 44 | C | 2.633371  | 2.228822  | 1.337956  |
| 45 | H | 2.741844  | 2.322318  | 2.418457  |
| 46 | C | 1.939002  | 3.174702  | 0.623330  |
| 47 | H | 1.472614  | 4.015748  | 1.142278  |
| 48 | C | -3.369018 | 1.140949  | -0.691828 |
| 49 | C | -2.794069 | 2.277192  | -1.337832 |
| 50 | H | -2.918423 | 2.371578  | -2.416472 |
| 51 | C | -2.134248 | 3.247672  | -0.624024 |
| 52 | H | -1.715396 | 4.114591  | -1.141742 |
| 53 | C | 4.468457  | -1.068132 | -0.695934 |
| 54 | C | 5.122301  | -2.158554 | -1.344949 |
| 55 | H | 5.016942  | -2.250554 | -2.426007 |
| 56 | C | 5.853404  | -3.082775 | -0.637931 |
| 57 | H | 6.344610  | -3.906164 | -1.162261 |

|    |   |           |           |           |
|----|---|-----------|-----------|-----------|
| 58 | C | -4.507073 | -1.083992 | 0.699941  |
| 59 | C | -5.136445 | -2.188654 | 1.349876  |
| 60 | H | -5.030791 | -2.277614 | 2.430942  |
| 61 | C | -5.841528 | -3.132134 | 0.641934  |
| 62 | H | -6.314631 | -3.965630 | 1.166951  |
| 63 | C | 4.567088  | -0.963695 | 0.743787  |
| 64 | C | 5.365669  | -1.928774 | 1.432500  |
| 65 | H | 5.518501  | -1.814348 | 2.506957  |
| 66 | C | 5.990535  | -2.958473 | 0.768168  |
| 67 | H | 6.612513  | -3.667034 | 1.322591  |
| 68 | C | -4.612579 | -0.981289 | -0.739559 |
| 69 | C | -5.388358 | -1.965719 | -1.427537 |
| 70 | H | -5.549609 | -1.851625 | -2.500828 |
| 71 | C | -5.983907 | -3.011612 | -0.763433 |
| 72 | H | -6.590702 | -3.734403 | -1.316229 |
| 73 | H | 3.159388  | -1.817544 | 3.257646  |
| 74 | H | -3.197093 | -1.821861 | -3.230248 |
| 75 | H | 4.509259  | 1.846113  | -3.301776 |
| 76 | H | -4.559764 | 1.826626  | 3.325804  |
| 77 | H | -2.147448 | -1.767314 | 6.182178  |
| 78 | H | -3.709852 | -2.591253 | 6.004241  |
| 79 | H | -3.567219 | -1.175185 | 7.085240  |
| 80 | H | 3.667031  | -2.533778 | 5.960191  |
| 81 | H | 2.086432  | -1.716540 | 6.077580  |
| 82 | H | 3.465398  | -1.137696 | 7.043207  |
| 83 | H | -4.308116 | 0.982280  | 7.088136  |
| 84 | H | -5.489696 | 1.834692  | 6.068485  |
| 85 | H | -3.800788 | 2.400869  | 6.144829  |
| 86 | H | 5.435947  | 1.873248  | 6.161948  |
| 87 | H | 4.185787  | 1.032054  | 7.118175  |



|     |   |           |           |           |
|-----|---|-----------|-----------|-----------|
| 88  | H | 3.765405  | 2.470792  | 6.149826  |
| 89  | H | 3.709334  | -2.528361 | -6.070885 |
| 90  | H | 3.534248  | -1.077432 | -7.099268 |
| 91  | H | 2.130829  | -1.727373 | -6.207770 |
| 92  | H | -3.469079 | -1.179318 | -7.023618 |
| 93  | H | -3.658318 | -2.565438 | -5.924982 |
| 94  | H | -2.088065 | -1.729651 | -6.045766 |
| 95  | H | 3.579134  | 1.684916  | -6.812206 |
| 96  | H | 5.271566  | 1.152195  | -6.700626 |
| 97  | H | 4.706855  | 2.529906  | -5.730041 |
| 98  | H | -4.249438 | 0.970588  | -7.124900 |
| 99  | H | -3.757327 | 2.411946  | -6.194602 |
| 100 | H | -5.448001 | 1.873080  | -6.158761 |

**Table S18. The optimized Coordinates (Angstroms) for final TS1**

| ATOM |   | X         | Y        | Z         |
|------|---|-----------|----------|-----------|
| 1    | N | 18.724027 | 7.621021 | 21.176096 |
| 2    | C | 19.114969 | 7.951297 | 18.711717 |
| 3    | N | 10.392747 | 7.600793 | 28.376422 |
| 4    | C | 10.294961 | 8.089881 | 30.831505 |
| 5    | N | 18.451950 | 7.676283 | 28.293964 |
| 6    | C | 18.666233 | 8.257924 | 30.740433 |
| 7    | N | 10.665908 | 7.727596 | 21.039629 |
| 8    | C | 10.789507 | 8.412355 | 18.617980 |
| 9    | N | 17.668834 | 5.635274 | 21.172862 |
| 10   | C | 17.565931 | 5.024331 | 18.719047 |
| 11   | N | 11.452307 | 5.645191 | 28.366735 |
| 12   | C | 11.974535 | 5.221847 | 30.791494 |
| 13   | N | 18.002462 | 5.515918 | 28.278780 |
| 14   | C | 17.979219 | 4.990516 | 30.730986 |
| 15   | N | 11.120077 | 5.530601 | 20.994562 |

|    |   |           |           |           |
|----|---|-----------|-----------|-----------|
| 16 | C | 11.307357 | 5.134477  | 18.533892 |
| 17 | C | 18.127921 | 6.661112  | 23.286649 |
| 18 | C | 10.861936 | 6.570834  | 26.128724 |
| 19 | C | 18.167667 | 6.623413  | 26.162803 |
| 20 | C | 10.822538 | 6.578231  | 23.240344 |
| 21 | C | 18.145253 | 6.685399  | 21.876432 |
| 22 | C | 10.865992 | 6.631068  | 27.610234 |
| 23 | C | 18.171701 | 6.589767  | 27.559825 |
| 24 | C | 10.854650 | 6.577718  | 21.782224 |
| 25 | O | 16.369794 | 6.337889  | 23.645650 |
| 26 | C | 16.907592 | 8.959766  | 23.307499 |
| 27 | H | 17.109093 | 9.101239  | 22.246366 |
| 28 | C | 16.232962 | 9.893967  | 24.050236 |
| 29 | H | 15.896284 | 10.817443 | 23.570596 |
| 30 | C | 17.409964 | 7.770870  | 23.939401 |
| 31 | C | 18.579006 | 7.162270  | 19.859089 |
| 32 | O | 12.620405 | 6.172198  | 25.858092 |
| 33 | C | 12.208341 | 8.828294  | 26.070042 |
| 34 | H | 12.029457 | 8.982591  | 27.134614 |
| 35 | C | 12.857880 | 9.750078  | 25.310809 |
| 36 | H | 13.208030 | 10.671908 | 25.782740 |
| 37 | C | 11.666183 | 7.636763  | 25.450428 |
| 38 | C | 10.694152 | 7.233962  | 29.677215 |
| 39 | O | 16.558609 | 6.013250  | 25.560308 |
| 40 | C | 16.468590 | 8.595752  | 26.101233 |
| 41 | H | 16.232023 | 8.422467  | 27.151962 |
| 42 | C | 15.981552 | 9.693296  | 25.442630 |
| 43 | H | 15.394897 | 10.428263 | 25.995913 |
| 44 | C | 17.314444 | 7.635111  | 25.419030 |
| 45 | C | 18.429694 | 7.297362  | 29.629451 |

|    |   |           |           |           |
|----|---|-----------|-----------|-----------|
| 46 | O | 12.458327 | 6.136952  | 23.914013 |
| 47 | C | 12.670758 | 8.459344  | 23.247628 |
| 48 | H | 12.952817 | 8.244418  | 22.215598 |
| 49 | C | 13.128684 | 9.548516  | 23.901742 |
| 50 | H | 13.747414 | 10.276840 | 23.376055 |
| 51 | C | 11.873354 | 7.401819  | 23.954797 |
| 52 | C | 10.880799 | 7.403279  | 19.708763 |
| 53 | C | 19.684314 | 4.699776  | 23.239388 |
| 54 | H | 19.684597 | 4.719985  | 22.148450 |
| 55 | C | 20.440890 | 3.745054  | 23.911158 |
| 56 | H | 21.019728 | 3.012852  | 23.342727 |
| 57 | C | 18.935119 | 5.646284  | 23.949906 |
| 58 | C | 17.972937 | 5.919397  | 19.836629 |
| 59 | C | 9.409427  | 4.576288  | 26.091517 |
| 60 | H | 9.425222  | 4.589906  | 27.183667 |
| 61 | C | 8.722598  | 3.564897  | 25.422100 |
| 62 | H | 8.217171  | 2.780722  | 25.991751 |
| 63 | C | 10.070996 | 5.590914  | 25.385372 |
| 64 | C | 11.375968 | 6.028751  | 29.692555 |
| 65 | C | 19.753881 | 4.693402  | 26.030736 |
| 66 | H | 19.771408 | 4.667044  | 27.119844 |
| 67 | C | 20.463790 | 3.737459  | 25.306734 |
| 68 | H | 21.044856 | 2.980151  | 25.840479 |
| 69 | C | 18.996287 | 5.674469  | 25.378600 |
| 70 | C | 18.144400 | 5.937936  | 29.590220 |
| 71 | C | 9.340274  | 4.548543  | 23.295326 |
| 72 | H | 9.346608  | 4.523138  | 22.205290 |
| 73 | C | 8.688441  | 3.556655  | 24.025540 |
| 74 | H | 8.158762  | 2.760066  | 23.496975 |
| 75 | C | 10.047033 | 5.563136  | 23.952085 |

|     |   |           |          |           |
|-----|---|-----------|----------|-----------|
| 76  | C | 11.066484 | 6.028615 | 19.705910 |
| 77  | H | 18.894904 | 7.466149 | 17.748094 |
| 78  | H | 20.208659 | 8.077131 | 18.791781 |
| 79  | H | 18.673600 | 8.962192 | 18.695261 |
| 80  | H | 10.662126 | 7.677712 | 31.784369 |
| 81  | H | 9.197268  | 8.180229 | 30.902442 |
| 82  | H | 10.695377 | 9.111889 | 30.719134 |
| 83  | H | 18.557473 | 8.624832 | 27.933980 |
| 84  | H | 19.644096 | 8.764757 | 30.650082 |
| 85  | H | 18.654939 | 7.728108 | 31.704825 |
| 86  | H | 17.888238 | 9.041553 | 30.784133 |
| 87  | H | 10.596828 | 8.667565 | 21.428777 |
| 88  | H | 9.792782  | 8.887654 | 18.573934 |
| 89  | H | 10.972330 | 7.933173 | 17.644943 |
| 90  | H | 11.537013 | 9.217719 | 18.737080 |
| 91  | H | 17.041477 | 4.927631 | 21.554664 |
| 92  | H | 18.046601 | 4.031709 | 18.789076 |
| 93  | H | 17.859245 | 5.466969 | 17.755409 |
| 94  | H | 16.472802 | 4.863032 | 18.695543 |
| 95  | H | 12.084985 | 4.950436 | 27.966684 |
| 96  | H | 13.069646 | 5.123560 | 30.680078 |
| 97  | H | 11.552081 | 4.202732 | 30.831739 |
| 98  | H | 11.780461 | 5.702445 | 31.761704 |
| 99  | H | 18.615693 | 4.101098 | 30.592092 |
| 100 | H | 16.936840 | 4.635166 | 30.799405 |
| 101 | H | 18.245298 | 5.460646 | 31.690626 |
| 102 | H | 11.387904 | 5.705258 | 17.596307 |
| 103 | H | 10.489672 | 4.401441 | 18.417440 |
| 104 | H | 12.238687 | 4.562077 | 18.674203 |

**Table S19. The optimized Coordinates (Angstroms) for final TS2**

| ATOM |   | X         | Y        | Z         |
|------|---|-----------|----------|-----------|
| 1    | N | 3.900768  | 7.987044 | 28.401856 |
| 2    | N | 10.242850 | 8.005829 | 21.081711 |
| 3    | N | 3.811619  | 8.060767 | 21.026164 |
| 4    | N | 10.332306 | 8.009287 | 28.361078 |
| 5    | N | 3.236654  | 5.850578 | 28.524469 |
| 6    | N | 11.049026 | 5.917523 | 20.914027 |
| 7    | N | 3.364066  | 5.864088 | 20.961848 |
| 8    | N | 10.921940 | 5.853443 | 28.535884 |
| 9    | C | 3.567206  | 6.833849 | 26.201098 |
| 10   | C | 10.624683 | 6.768123 | 23.247698 |
| 11   | C | 3.567065  | 6.879300 | 23.257242 |
| 12   | C | 10.625578 | 6.792790 | 26.189650 |
| 13   | C | 3.995078  | 8.717997 | 30.834754 |
| 14   | C | 10.135647 | 8.788320 | 18.664188 |
| 15   | C | 3.922290  | 8.704836 | 18.562589 |
| 16   | C | 10.289021 | 8.810733 | 30.775001 |
| 17   | C | 3.109010  | 5.545878 | 31.034802 |
| 18   | C | 11.311915 | 5.709153 | 18.403428 |
| 19   | C | 3.220667  | 5.500073 | 18.452232 |
| 20   | C | 11.097156 | 5.617144 | 31.047060 |
| 21   | C | 3.564069  | 6.841918 | 27.675668 |
| 22   | C | 10.626298 | 6.854625 | 21.772601 |
| 23   | C | 3.568051  | 6.913936 | 21.779453 |
| 24   | C | 10.622555 | 6.833795 | 27.664105 |
| 25   | C | 3.750577  | 7.706914 | 29.764688 |
| 26   | C | 4.399992  | 5.824831 | 25.453134 |
| 27   | C | 5.915023  | 3.831695 | 25.401669 |
| 28   | H | 6.134188  | 2.903946 | 25.918679 |
| 29   | C | 5.156785  | 4.750955 | 26.104668 |

|    |   |           |           |           |
|----|---|-----------|-----------|-----------|
| 30 | H | 5.016901  | 4.651397  | 27.179079 |
| 31 | O | 4.821867  | 7.226579  | 25.379755 |
| 32 | C | 10.450685 | 7.774388  | 19.716541 |
| 33 | C | 9.769801  | 5.727617  | 23.901925 |
| 34 | C | 8.201977  | 3.831695  | 23.936331 |
| 35 | H | 7.965123  | 2.896989  | 23.439915 |
| 36 | C | 9.078060  | 4.645270  | 23.240424 |
| 37 | H | 9.298063  | 4.481147  | 22.188682 |
| 38 | O | 9.232624  | 7.090293  | 23.848858 |
| 39 | C | 3.720050  | 7.721949  | 19.672209 |
| 40 | C | 4.397986  | 5.782147  | 23.880007 |
| 41 | C | 5.915023  | 3.831695  | 23.936331 |
| 42 | H | 6.148128  | 2.900465  | 23.431178 |
| 43 | C | 5.079574  | 4.680939  | 23.229745 |
| 44 | H | 4.876914  | 4.535372  | 22.172216 |
| 45 | O | 4.972676  | 7.130339  | 23.860776 |
| 46 | C | 10.481263 | 7.760528  | 29.730529 |
| 47 | C | 9.755963  | 5.796145  | 25.464959 |
| 48 | C | 8.201977  | 3.831695  | 25.401669 |
| 49 | H | 7.986471  | 2.901436  | 25.914513 |
| 50 | C | 8.962024  | 4.746226  | 26.113391 |
| 51 | H | 9.094821  | 4.644044  | 27.188972 |
| 52 | O | 9.379752  | 7.209315  | 25.366583 |
| 53 | C | 3.401664  | 6.366151  | 29.820529 |
| 54 | C | 2.594502  | 7.668527  | 25.462502 |
| 55 | C | 1.273481  | 9.720606  | 25.470664 |
| 56 | H | 0.768825  | 10.509211 | 26.028160 |
| 57 | C | 1.950678  | 8.707804  | 26.151204 |
| 58 | H | 1.944719  | 8.697228  | 27.239817 |
| 59 | C | 10.939234 | 6.477219  | 19.631023 |

|    |   |           |           |           |
|----|---|-----------|-----------|-----------|
| 60 | C | 11.604127 | 7.589227  | 24.005133 |
| 61 | C | 13.024911 | 9.568304  | 24.001796 |
| 62 | H | 13.551741 | 10.345256 | 23.451028 |
| 63 | C | 12.306242 | 8.587571  | 23.316450 |
| 64 | H | 12.291960 | 8.594415  | 22.227605 |
| 65 | C | 3.438932  | 6.363366  | 19.653476 |
| 66 | C | 2.617658  | 7.704336  | 24.038212 |
| 67 | C | 1.260277  | 9.732540  | 24.069585 |
| 68 | H | 0.741788  | 10.524426 | 23.530204 |
| 69 | C | 1.945628  | 8.740869  | 23.368415 |
| 70 | H | 1.932139  | 8.750140  | 22.279663 |
| 71 | C | 10.787550 | 6.409626  | 29.819154 |
| 72 | C | 11.629757 | 7.574748  | 25.432045 |
| 73 | C | 13.021518 | 9.576301  | 25.402591 |
| 74 | H | 13.542003 | 10.364870 | 25.944963 |
| 75 | C | 12.311870 | 8.598864  | 26.102774 |
| 76 | H | 12.312424 | 8.611814  | 27.191326 |
| 77 | H | 9.808038  | 8.824749  | 21.496941 |
| 78 | H | 10.027380 | 8.879829  | 27.935806 |
| 79 | H | 4.957316  | 9.241669  | 30.710370 |
| 80 | H | 4.015770  | 8.228496  | 31.816354 |
| 81 | H | 3.204070  | 9.488104  | 30.868707 |
| 82 | H | 9.350278  | 8.440427  | 17.971889 |
| 83 | H | 11.026364 | 9.023630  | 18.059556 |
| 84 | H | 9.785783  | 9.727927  | 19.112421 |
| 85 | H | 2.992106  | 8.868434  | 17.993464 |
| 86 | H | 4.684771  | 8.355803  | 17.847879 |
| 87 | H | 4.252725  | 9.680901  | 18.944906 |
| 88 | H | 10.334089 | 8.350631  | 31.770843 |
| 89 | H | 9.314812  | 9.322054  | 30.689002 |

|     |   |           |          |           |
|-----|---|-----------|----------|-----------|
| 90  | H | 11.077235 | 9.583204 | 30.736529 |
| 91  | H | 3.713106  | 4.626086 | 31.050799 |
| 92  | H | 2.050145  | 5.243117 | 31.054216 |
| 93  | H | 3.321768  | 6.112685 | 31.952829 |
| 94  | H | 11.093631 | 6.287098 | 17.493300 |
| 95  | H | 10.764387 | 4.753480 | 18.342054 |
| 96  | H | 12.386570 | 5.462972 | 18.399949 |
| 97  | H | 3.755504  | 4.544388 | 18.554638 |
| 98  | H | 3.581591  | 6.004131 | 17.545750 |
| 99  | H | 2.153598  | 5.260645 | 18.309787 |
| 100 | H | 12.168135 | 5.353340 | 31.080543 |
| 101 | H | 10.528826 | 4.673981 | 31.067519 |
| 102 | H | 10.857365 | 6.187310 | 31.955825 |
| 103 | H | 4.240779  | 8.854780 | 27.997868 |
| 104 | H | 4.044743  | 8.972930 | 21.406407 |

**Table S20. The optimized Coordinates (Angstroms) for final TS3**

| ATOM |   | X         | Y        | Z         |
|------|---|-----------|----------|-----------|
| 1    | C | 17.234321 | 6.480980 | 26.146473 |
| 2    | C | 10.909662 | 6.513091 | 23.226764 |
| 3    | C | 17.203285 | 6.585578 | 23.239796 |
| 4    | C | 10.949052 | 6.688173 | 26.137093 |
| 5    | C | 17.984332 | 7.422632 | 29.532437 |
| 6    | C | 10.194707 | 7.362444 | 19.807218 |
| 7    | C | 17.919296 | 7.555749 | 19.853329 |
| 8    | C | 10.296680 | 7.525099 | 29.580468 |
| 9    | C | 17.560204 | 6.129923 | 29.778229 |
| 10   | C | 10.727563 | 6.109369 | 19.587079 |
| 11   | C | 17.637578 | 6.220729 | 19.632579 |
| 12   | C | 10.623041 | 6.192755 | 29.739198 |
| 13   | C | 17.385681 | 6.642946 | 27.605475 |



|    |   |           |          |           |
|----|---|-----------|----------|-----------|
| 14 | C | 10.770669 | 6.633806 | 21.765124 |
| 15 | C | 17.323468 | 6.770917 | 21.779912 |
| 16 | C | 10.849661 | 6.831473 | 27.604208 |
| 17 | C | 18.467274 | 8.439293 | 30.513142 |
| 18 | C | 15.891242 | 6.754951 | 25.490993 |
| 19 | N | 17.883107 | 7.722996 | 28.191974 |
| 20 | C | 9.651222  | 8.327711 | 18.806166 |
| 21 | C | 12.261670 | 6.768990 | 23.878891 |
| 22 | N | 10.211137 | 7.668049 | 21.151147 |
| 23 | C | 18.359907 | 8.591051 | 18.870757 |
| 24 | C | 15.861588 | 6.778949 | 23.930517 |
| 25 | N | 17.723249 | 7.880214 | 21.179476 |
| 26 | C | 9.851260  | 8.503284 | 30.615914 |
| 27 | C | 12.292757 | 6.829225 | 25.440503 |
| 28 | N | 10.431298 | 7.903294 | 28.257542 |
| 29 | C | 17.445887 | 5.353573 | 31.039728 |
| 30 | C | 18.361623 | 6.237645 | 25.408522 |
| 31 | N | 17.166532 | 5.648563 | 28.541062 |
| 32 | C | 10.922820 | 5.318849 | 18.343035 |
| 33 | C | 9.767538  | 6.363963 | 23.974228 |
| 34 | N | 11.113662 | 5.662730 | 20.841101 |
| 35 | C | 17.649889 | 5.387067 | 18.403351 |
| 36 | C | 18.346364 | 6.299428 | 23.937582 |
| 37 | N | 17.241956 | 5.736913 | 20.866316 |
| 38 | C | 10.695632 | 5.306075 | 30.929079 |
| 39 | C | 9.787515  | 6.455536 | 25.444573 |
| 40 | N | 10.988413 | 5.766082 | 28.474540 |
| 41 | C | 14.049494 | 4.876327 | 25.462807 |
| 42 | C | 14.065918 | 4.858779 | 23.953347 |
| 43 | C | 14.831555 | 5.927365 | 26.200973 |

|    |   |           |          |           |
|----|---|-----------|----------|-----------|
| 44 | O | 15.643740 | 8.202435 | 25.490310 |
| 45 | C | 13.308261 | 5.909337 | 23.191019 |
| 46 | O | 12.530004 | 8.211371 | 23.843219 |
| 47 | C | 14.841930 | 5.910361 | 23.212020 |
| 48 | O | 15.517970 | 8.204083 | 23.981597 |
| 49 | C | 13.298710 | 5.962122 | 26.180701 |
| 50 | O | 12.662195 | 8.247527 | 25.351207 |
| 51 | C | 19.616101 | 5.921952 | 26.056700 |
| 52 | C | 20.737952 | 5.662414 | 25.339912 |
| 53 | C | 20.727459 | 5.736660 | 23.902626 |
| 54 | C | 19.590703 | 6.060441 | 23.237884 |
| 55 | C | 8.493068  | 6.102647 | 23.340733 |
| 56 | C | 7.355966  | 5.936861 | 24.063831 |
| 57 | C | 7.373357  | 6.039668 | 25.497978 |
| 58 | C | 8.532751  | 6.304467 | 26.152036 |
| 59 | C | 14.016996 | 3.339195 | 25.512498 |
| 60 | C | 14.056637 | 3.320468 | 23.950502 |
| 61 | H | 19.173603 | 9.117325 | 30.015573 |
| 62 | H | 18.972797 | 7.978305 | 31.377168 |
| 63 | H | 17.637423 | 9.058461 | 30.896955 |
| 64 | H | 9.250405  | 7.813058 | 17.920313 |
| 65 | H | 10.411680 | 9.049831 | 18.460325 |
| 66 | H | 8.840871  | 8.908639 | 19.272418 |
| 67 | H | 17.505686 | 9.146451 | 18.443077 |
| 68 | H | 18.927779 | 8.149894 | 18.034658 |
| 69 | H | 19.004077 | 9.321365 | 19.379199 |
| 70 | H | 9.340130  | 8.007197 | 31.457908 |
| 71 | H | 9.153653  | 9.221442 | 30.161058 |
| 72 | H | 10.695558 | 9.085216 | 31.025616 |
| 73 | H | 17.955586 | 4.376832 | 30.986797 |

|     |   |           |          |           |
|-----|---|-----------|----------|-----------|
| 74  | H | 16.397306 | 5.166845 | 31.324679 |
| 75  | H | 17.912070 | 5.923609 | 31.856421 |
| 76  | H | 16.915130 | 4.683976 | 28.334847 |
| 77  | H | 10.339483 | 5.770581 | 17.528082 |
| 78  | H | 10.592346 | 4.271712 | 18.450062 |
| 79  | H | 11.975808 | 5.301274 | 18.015985 |
| 80  | H | 11.395379 | 4.708820 | 21.058924 |
| 81  | H | 18.200822 | 4.440173 | 18.542219 |
| 82  | H | 18.139455 | 5.940549 | 17.589745 |
| 83  | H | 16.633510 | 5.128287 | 18.062710 |
| 84  | H | 17.087672 | 4.756433 | 21.093922 |
| 85  | H | 11.736394 | 5.060485 | 31.195000 |
| 86  | H | 10.162001 | 4.352699 | 30.771978 |
| 87  | H | 10.240073 | 5.798976 | 31.799280 |
| 88  | H | 11.172016 | 4.802228 | 28.205861 |
| 89  | H | 15.145047 | 5.643804 | 27.208508 |
| 90  | H | 12.999760 | 5.611045 | 22.188504 |
| 91  | H | 15.187236 | 5.607294 | 22.220533 |
| 92  | H | 12.953680 | 5.694637 | 27.180931 |
| 93  | H | 19.630711 | 5.880177 | 27.146523 |
| 94  | H | 21.666032 | 5.403989 | 25.853462 |
| 95  | H | 21.650745 | 5.544644 | 23.350344 |
| 96  | H | 19.584137 | 6.154716 | 22.151901 |
| 97  | H | 8.462089  | 6.038370 | 22.252657 |
| 98  | H | 6.413122  | 5.730637 | 23.552354 |
| 99  | H | 6.439890  | 5.923675 | 26.055444 |
| 100 | H | 8.555994  | 6.418714 | 27.235093 |
| 101 | H | 14.891198 | 2.871998 | 25.990650 |
| 102 | H | 13.100420 | 2.912097 | 25.943972 |
| 103 | H | 13.170659 | 2.865181 | 23.483213 |

104 H 14.960202 2.856367 23.529709

**Table S21. The optimized Coordinates (Angstroms) for final state**

| ATOM | X         | Y         | Z         |
|------|-----------|-----------|-----------|
| 1 C  | 13.773193 | 20.748942 | 1.347679  |
| 2 C  | 8.391692  | 20.563152 | -1.482060 |
| 3 C  | 13.875065 | 20.423405 | -1.489986 |
| 4 C  | 8.486569  | 20.286426 | 1.364907  |
| 5 C  | 14.169737 | 19.653318 | 6.207082  |
| 6 C  | 7.284211  | 19.501496 | -6.224388 |
| 7 C  | 12.501036 | 19.824128 | -6.193943 |
| 8 C  | 9.094744  | 18.724838 | 6.045796  |
| 9 C  | 13.510632 | 22.858336 | 5.845278  |
| 10 C | 9.426885  | 22.035907 | -6.085440 |
| 11 C | 15.290052 | 21.616809 | -6.106166 |
| 12 C | 7.663983  | 21.711619 | 6.075645  |
| 13 C | 13.880348 | 20.995642 | 2.804310  |
| 14 C | 8.352189  | 20.695509 | -2.928897 |
| 15 C | 13.910189 | 20.416485 | -2.930992 |
| 16 C | 8.378608  | 20.159430 | 2.832899  |
| 17 C | 14.016534 | 20.481855 | 4.978191  |
| 18 N | 14.120063 | 19.973462 | 3.695833  |
| 19 C | 15.006035 | 20.677220 | 0.673256  |
| 20 C | 7.892465  | 20.210991 | -5.064081 |
| 21 N | 7.582958  | 19.901195 | -3.754703 |
| 22 C | 7.138491  | 20.503992 | -0.771598 |
| 23 C | 13.316143 | 20.251607 | -5.016798 |
| 24 N | 12.953622 | 19.939558 | -3.739273 |
| 25 C | 15.133588 | 20.432037 | -0.766272 |
| 26 C | 8.667170  | 19.588128 | 4.902587  |
| 27 N | 8.873073  | 19.193214 | 3.596866  |

|    |   |           |           |           |
|----|---|-----------|-----------|-----------|
| 28 | C | 7.260539  | 20.295110 | 0.678128  |
| 29 | C | 13.697449 | 21.812865 | 4.798771  |
| 30 | N | 13.608330 | 22.119548 | 3.454590  |
| 31 | C | 12.469974 | 20.617573 | 0.706597  |
| 32 | C | 8.818565  | 21.237178 | -4.978288 |
| 33 | N | 9.106701  | 21.513850 | -3.666618 |
| 34 | C | 9.919179  | 20.480479 | -0.826303 |
| 35 | C | 14.517436 | 20.955534 | -5.017955 |
| 36 | N | 14.889690 | 21.021710 | -3.691952 |
| 37 | C | 12.343322 | 20.511893 | -0.833601 |
| 38 | C | 8.077262  | 20.838008 | 4.944206  |
| 39 | N | 7.895176  | 21.182882 | 3.618026  |
| 40 | C | 9.800224  | 20.395365 | 0.717966  |
| 41 | C | 11.070523 | 22.891697 | 0.643518  |
| 42 | C | 11.184290 | 18.107275 | 0.659407  |
| 43 | C | 11.150442 | 21.580861 | 1.263088  |
| 44 | C | 11.094859 | 19.414330 | 1.275794  |
| 45 | C | 11.084378 | 22.895571 | -0.703013 |
| 46 | C | 11.170288 | 18.096828 | -0.688727 |
| 47 | C | 11.128610 | 21.574884 | -1.325744 |
| 48 | C | 11.130473 | 19.411352 | -1.318704 |
| 49 | H | 14.324557 | 19.008560 | 3.443238  |
| 50 | H | 6.945438  | 19.173931 | -3.433894 |
| 51 | H | 15.682492 | 21.526492 | -3.298456 |
| 52 | C | 16.204795 | 20.893153 | 1.455878  |
| 53 | C | 17.470430 | 20.729909 | 0.984037  |
| 54 | C | 17.688028 | 20.334319 | -0.368756 |
| 55 | C | 16.659683 | 20.216909 | -1.236943 |
| 56 | C | 5.613751  | 20.665644 | -1.265389 |
| 57 | C | 4.584466  | 20.521871 | -0.406734 |

|    |   |           |           |           |
|----|---|-----------|-----------|-----------|
| 58 | C | 4.797674  | 20.167389 | 0.960856  |
| 59 | C | 6.059777  | 20.056176 | 1.452830  |
| 60 | H | 16.071560 | 21.200165 | 2.493356  |
| 61 | H | 18.323093 | 20.869361 | 1.648695  |
| 62 | H | 18.700357 | 20.107473 | -0.712099 |
| 63 | H | 16.808253 | 19.856895 | -2.254467 |
| 64 | H | 5.467490  | 20.954554 | -2.305786 |
| 65 | H | 3.568556  | 20.686344 | -0.768602 |
| 66 | H | 3.939566  | 19.998071 | 1.611553  |
| 67 | H | 6.188465  | 19.760418 | 2.493301  |
| 68 | H | 11.023697 | 23.795398 | 1.255869  |
| 69 | H | 11.235555 | 17.204251 | 1.272796  |
| 70 | H | 11.137114 | 21.575288 | 2.357484  |
| 71 | H | 11.116884 | 19.433952 | 2.369176  |
| 72 | H | 11.036226 | 23.802839 | -1.307867 |
| 73 | H | 11.213942 | 17.183104 | -1.285340 |
| 74 | H | 11.066884 | 21.585615 | -2.419238 |
| 75 | H | 11.188710 | 19.404882 | -2.412823 |
| 76 | H | 7.459306  | 22.029948 | 3.259267  |
| 77 | H | 7.120498  | 18.434971 | -6.002490 |
| 78 | H | 7.950131  | 19.556928 | -7.095283 |
| 79 | H | 6.310395  | 19.922478 | -6.527421 |
| 80 | H | 12.540979 | 20.564636 | -7.006858 |
| 81 | H | 11.455667 | 19.684292 | -5.887339 |
| 82 | H | 12.853143 | 18.864221 | -6.606320 |
| 83 | H | 9.572213  | 23.071503 | -5.750729 |
| 84 | H | 8.782363  | 22.048505 | -6.973952 |
| 85 | H | 10.414398 | 21.651458 | -6.384583 |
| 86 | H | 15.206200 | 21.055197 | -7.048956 |
| 87 | H | 16.360973 | 21.691645 | -5.854127 |

|     |   |           |           |           |
|-----|---|-----------|-----------|-----------|
| 88  | H | 14.929294 | 22.641994 | -6.300286 |
| 89  | H | 14.525693 | 20.276583 | 7.040879  |
| 90  | H | 14.898528 | 18.842550 | 6.065809  |
| 91  | H | 13.218362 | 19.190728 | 6.525535  |
| 92  | H | 8.868078  | 17.670380 | 5.827341  |
| 93  | H | 8.577185  | 19.001093 | 6.976381  |
| 94  | H | 10.183333 | 18.796378 | 6.224173  |
| 95  | H | 13.154850 | 22.433131 | 6.794842  |
| 96  | H | 12.777970 | 23.603776 | 5.504644  |
| 97  | H | 14.449667 | 23.401109 | 6.048691  |
| 98  | H | 7.986260  | 22.755183 | 5.927653  |
| 99  | H | 8.125296  | 21.355844 | 7.005621  |
| 100 | H | 6.571588  | 21.720281 | 6.229671  |

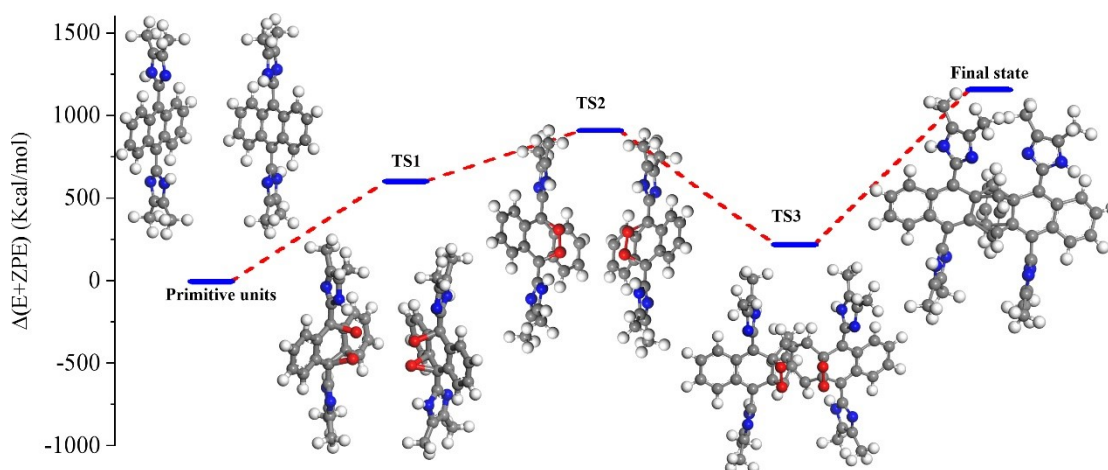

**Figure S20.** Schematic diagram of the free energy change in each step of the selected bimolecular unit polymerization process

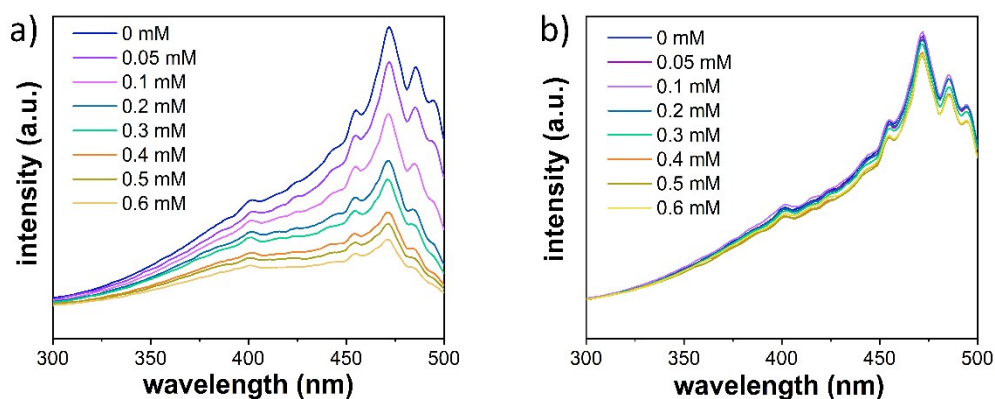

**Figure S21.** Fluorescence quenching of Zr-MOF-hv with increasing the concentration of THF (a) and **1a** (b)

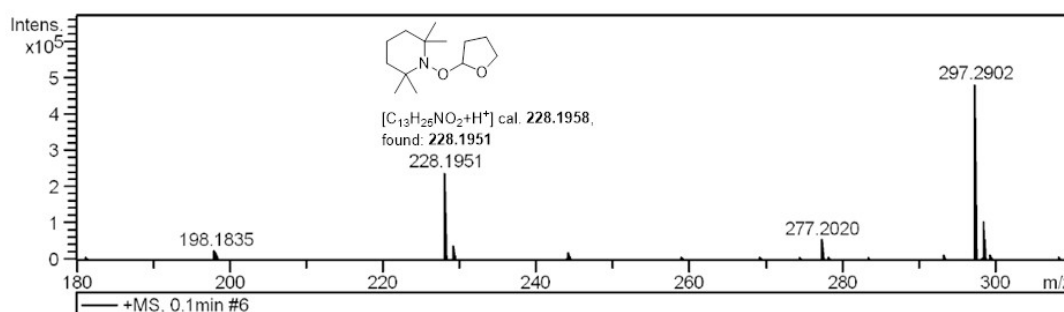

**Figure S22.** High-resolution mass spectrometry (HRMS) data for free radical trapping experiments

## Characterization Data of the Products

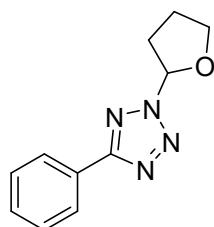

### 5-phenyl-2-(tetrahydrofuran-2-yl)-2H-tetrazole (**2a**)

<sup>1</sup>H NMR (400 MHz, CDCl<sub>3</sub>) δ 8.02 (s, 1H), 7.72 (d, *J* = 8.1 Hz, 1H), 7.61 (d, *J* = 8.5 Hz, 1H), 7.42 - 7.38 (m, 1H), 7.17 (t, *J* = 7.5 Hz, 1H), 4.07 - 3.97 (m, 2H), 2.95 - 2.91 (m, 1H), 2.47 - 2.36 (m, 2H), 2.16 - 2.07 (m, 1H); <sup>13</sup>C NMR (100 MHz, CDCl<sub>3</sub>) δ 139.88, 133.94, 126.56, 124.70, 121.14, 121.01, 109.68, 86.89, 68.77, 30.26, 25.08.



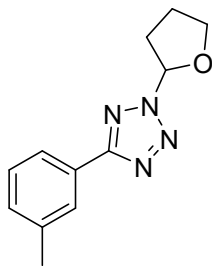

**2-(tetrahydrofuran-2-yl)-5-(m-tolyl)-2H-tetrazole (2b)**

$^1\text{H}$  NMR (400 MHz,  $\text{CDCl}_3$ )  $\delta$  7.99 - 7.95 (m, 2H), 7.37 (t,  $J = 7.6$  Hz, 1H), 7.29 (s, 1H), 6.57 (dd,  $J = 6.5, 2.1$  Hz, 1H), 4.31 - 4.25 (m, 1H), 4.17 - 4.11 (m, 1H), 2.74 - 2.66 (m, 1H), 2.57 - 2.47 (m, 2H), 2.43 (s, 3H), 2.24 - 2.10 (m, 1H);  $^{13}\text{C}$  NMR (100 MHz,  $\text{CDCl}_3$ )  $\delta$  165.30, 138.62, 131.14, 128.78, 127.53, 127.22, 124.08, 91.66, 70.22, 31.85, 24.06, 21.38.

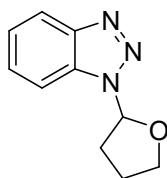

**1-(tetrahydrofuran-2-yl)-1H-benzo[d][1,2,3]triazole (2c)**

$^1\text{H}$  NMR (400 MHz,  $\text{CDCl}_3$ )  $\delta$  8.07 (d,  $J = 8.3$  Hz, 1H), 7.72 (d,  $J = 8.3$  Hz, 1H), 7.50 (t,  $J = 7.6$  Hz, 1H), 7.38 (t,  $J = 7.5$  Hz, 1H), 6.52 (dd,  $J = 6.7, 2.4$  Hz, 1H), 4.13 - 4.01 (m, 2H), 3.21 - 3.14 (m, 1H), 2.57 - 2.35 (m, 2H), 2.23 - 2.14 (m, 1H);  $^{13}\text{C}$  NMR (100 MHz,  $\text{CDCl}_3$ )  $\delta$  132.88, 127.50, 124.13, 119.88, 110.43, 87.92, 69.29, 30.81, 24.39.

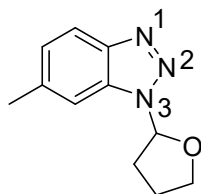

**5-methyl-1-(tetrahydrofuran-2-yl)-1H-benzo[d][1,2,3]triazole and 6-methyl-1-(tetrahydrofuran-2-yl)-1H-benzo[d][1,2,3]triazole (2d)**

$^1\text{H}$  NMR (400 MHz,  $\text{CDCl}_3$ )  $\delta$  7.92 (d,  $J = 8.5$  Hz, 1.00H), 7.81 (s, 0.60H), 7.58 (d,  $J = 8.5$  Hz, 0.62H), 7.47 (s, 1.00H), 7.32 (d,  $J = 7.5$  Hz, 0.62H), 7.20 (d,  $J = 8.5$  Hz, 1.00H), 6.47 (t,  $J = 7.0$  Hz, 1.67H), 4.14 - 3.93 (m, 4.25H), 3.20 - 3.11 (m, 1.74H), 2.53 (s, 3.24H), 2.51 (s, 2.24H), 2.49 - 2.35 (m, 2.90H), 2.22 - 2.11 (m, 1.84H).  $^{13}\text{C}$  NMR (100 MHz,  $\text{CDCl}_3$ )  $\delta$  146.98, 145.04, 138.12, 134.12, 133.30, 131.30, 129.63, 126.38, 119.28, 118.76, 109.90, 109.56, 87.90, 87.64, 69.19, 30.77, 30.61, 24.42, 24.39, 22.00, 21.47.

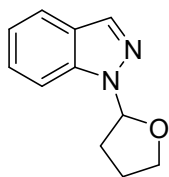

**1-(tetrahydrofuran-2-yl)-1H-indazole (2e)**

$^1\text{H}$  NMR (400 MHz,  $\text{CDCl}_3$ )  $\delta$  8.02 (s, 1H), 7.72 (d,  $J = 8.1$  Hz, 1H), 7.61 (d,  $J = 8.5$  Hz, 1H), 7.42 - 7.38 (m, 1H), 7.17 (t,  $J = 7.5$  Hz, 1H), 6.40 (dd,  $J = 6.7, 3.3$  Hz, 1H), 4.07 - 3.97 (m, 2H), 2.98.00 - 2.91 (m, 1H), 2.47 - 2.36 (m, 2H), 2.16 - 2.07 (m, 1H);  $^{13}\text{C}$  NMR (100 MHz,  $\text{CDCl}_3$ )  $\delta$  139.88, 133.94, 126.56, 124.70, 121.14, 121.01, 109.68, 86.89, 68.77, 30.26, 25.08.

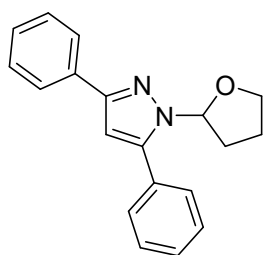

**3,5-diphenyl-1-(tetrahydrofuran-2-yl)-1H-pyrazole (2f)**

$^1\text{H}$  NMR (400 MHz,  $\text{CDCl}_3$ )  $\delta$  7.86 (d,  $J = 7.2$  Hz, 2H), 7.60 (d,  $J = 7.0$  Hz, 2H), 7.44 (dq,  $J = 22.8, 7.3$  Hz, 6H), 7.32 (d,  $J = 7.3$  Hz, 1H), 6.62 (s, 1H), 5.99 (dd,  $J = 7.2, 3.0$  Hz, 1H), 4.28 (q,  $J = 7.4$  Hz, 1H), 4.02 - 3.97 (m, 1H), 2.89 - 2.79 (m, 1H), 2.66 - 2.56 (m, 1H), 2.26 - 2.19 (m, 1H), 2.08 - 2.04 (m, 1H);  $^{13}\text{C}$  NMR (101 MHz,  $\text{CDCl}_3$ )  $\delta$  150.82, 145.70, 133.61, 130.50, 129.30, 129.03, 128.68, 128.60, 128.52, 125.76, 103.64, 86.60, 69.15, 31.01, 25.56.

**2a-<sup>1</sup>H NMR (400 MHz, CDCl<sub>3</sub>)**

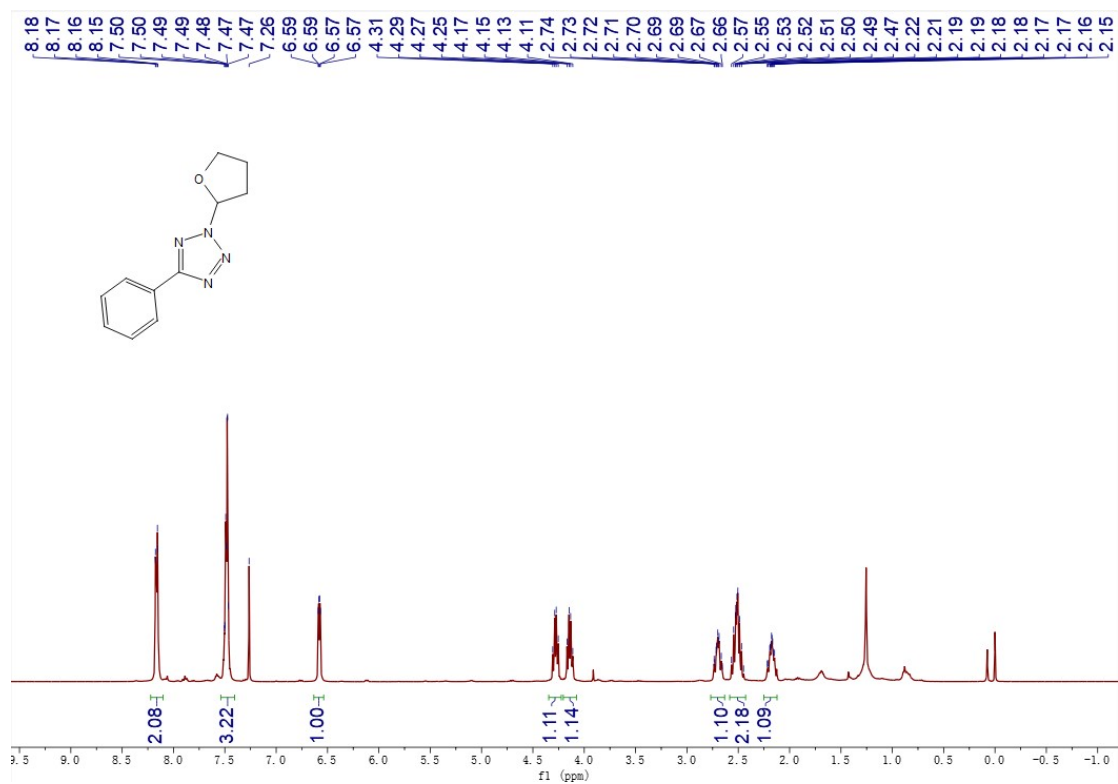

**2a-<sup>13</sup>C NMR (100 MHz, CDCl<sub>3</sub>)**

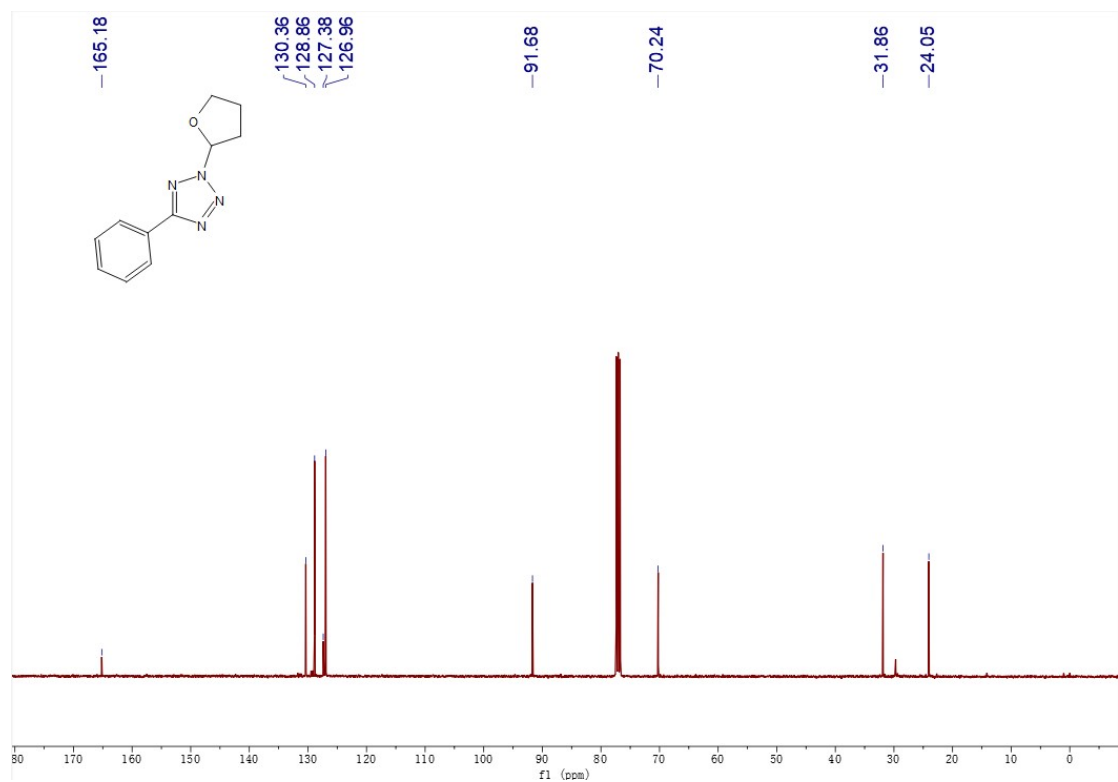

**2b-<sup>1</sup>H NMR (400 MHz, CDCl<sub>3</sub>)**

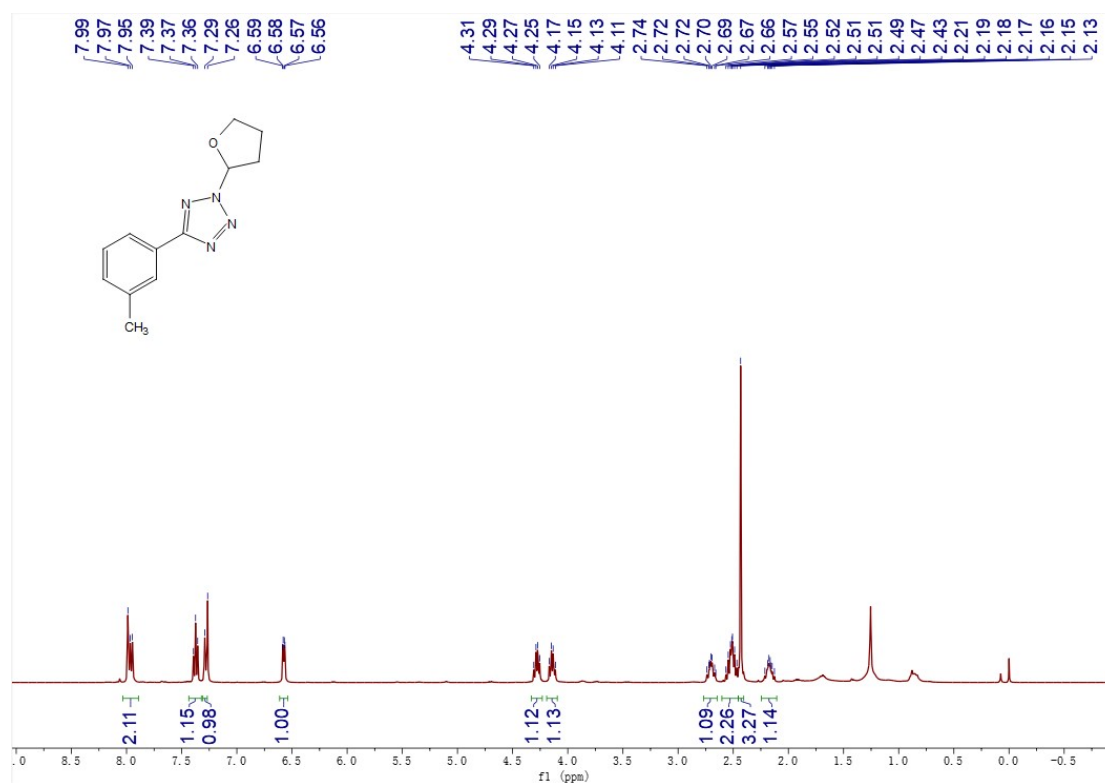

**2b-<sup>13</sup>C NMR (100 MHz, CDCl<sub>3</sub>)**

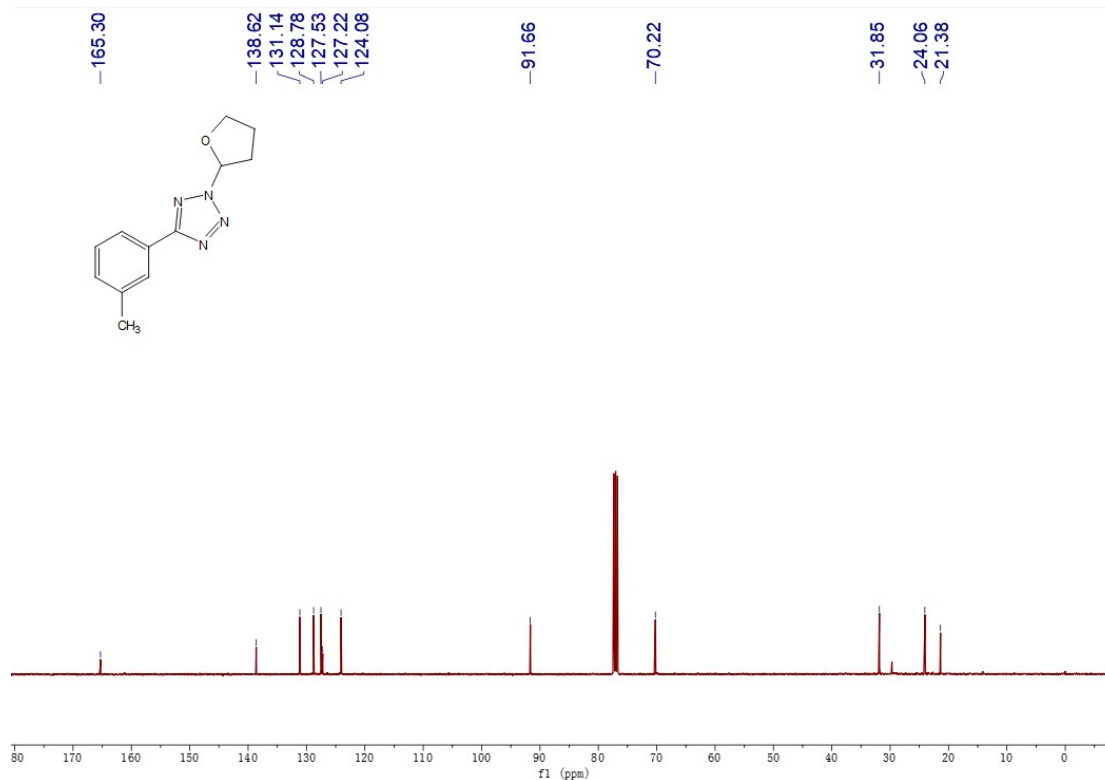

**2c-<sup>1</sup>H NMR (400 MHz, CDCl<sub>3</sub>)**

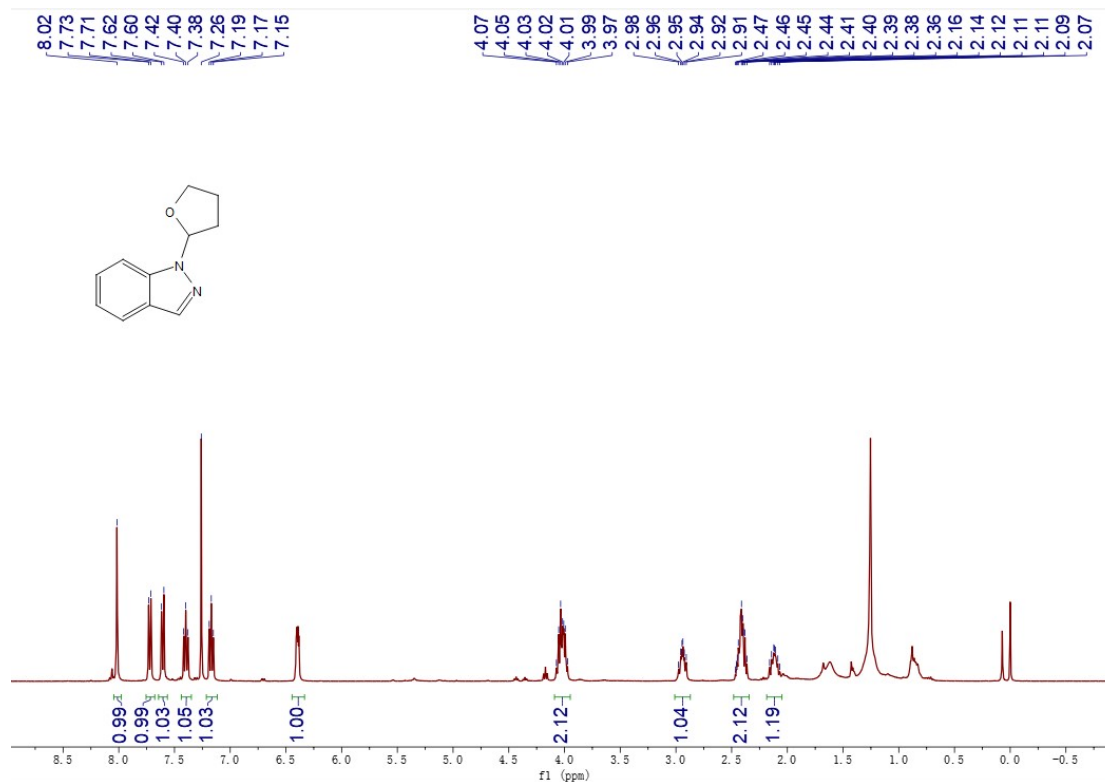

**2c-<sup>13</sup>C NMR (100 MHz, CDCl<sub>3</sub>)**

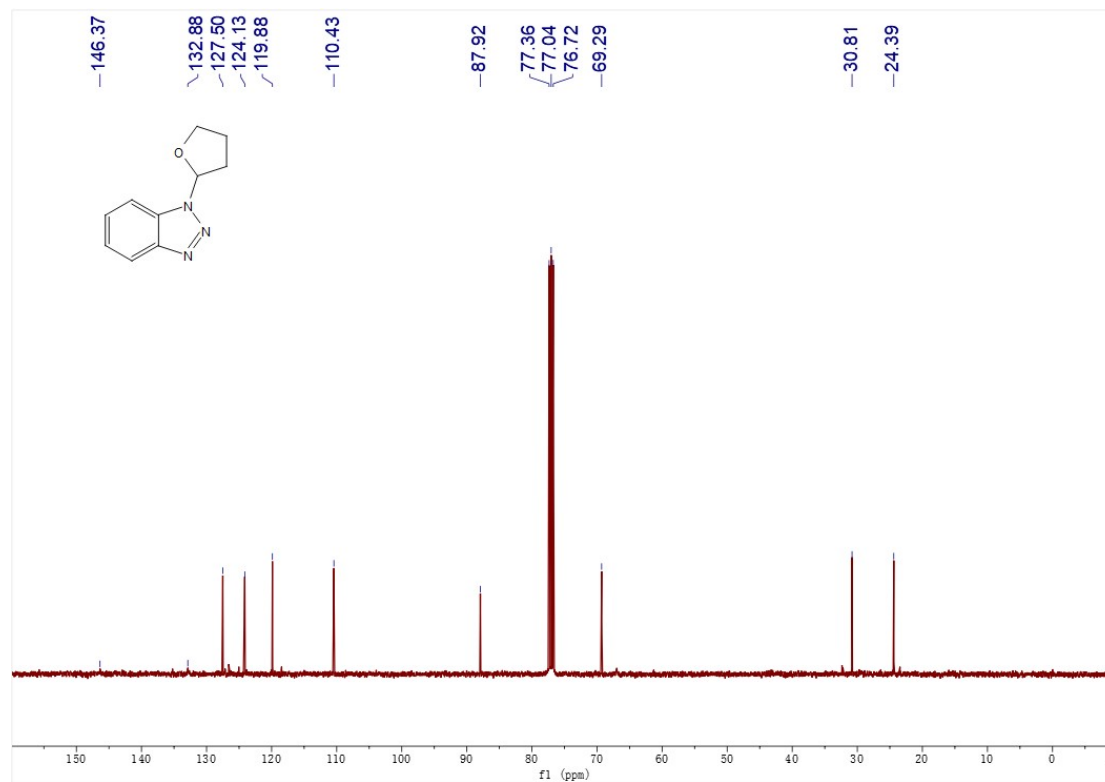

### 2d-<sup>1</sup>H NMR (400 MHz, CDCl<sub>3</sub>)

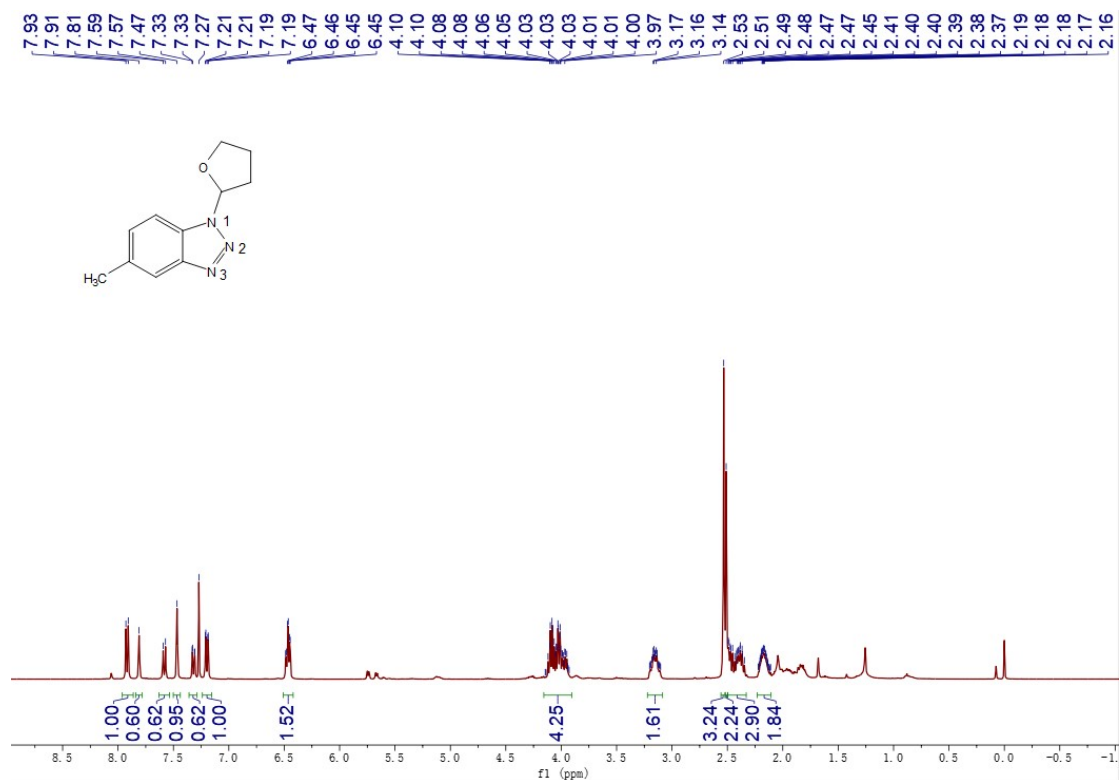

### 2d-<sup>13</sup>C NMR (100 MHz, CDCl<sub>3</sub>)

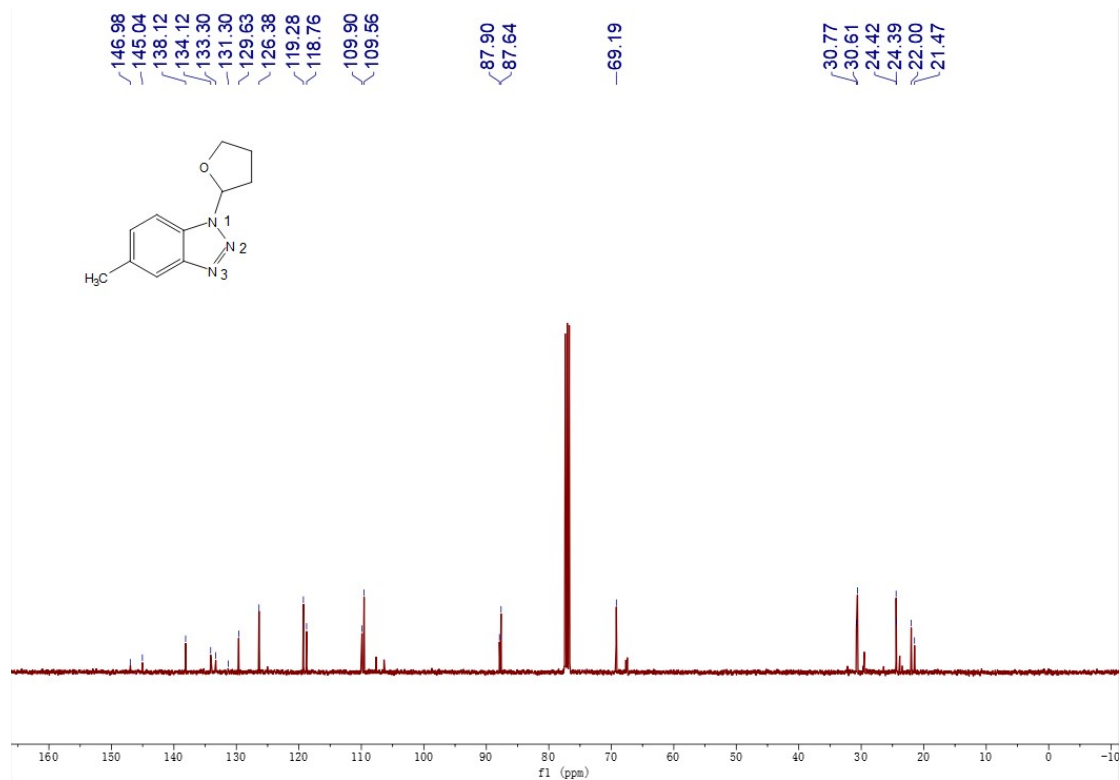

**2e-<sup>1</sup>H NMR (400 MHz, CDCl<sub>3</sub>)**

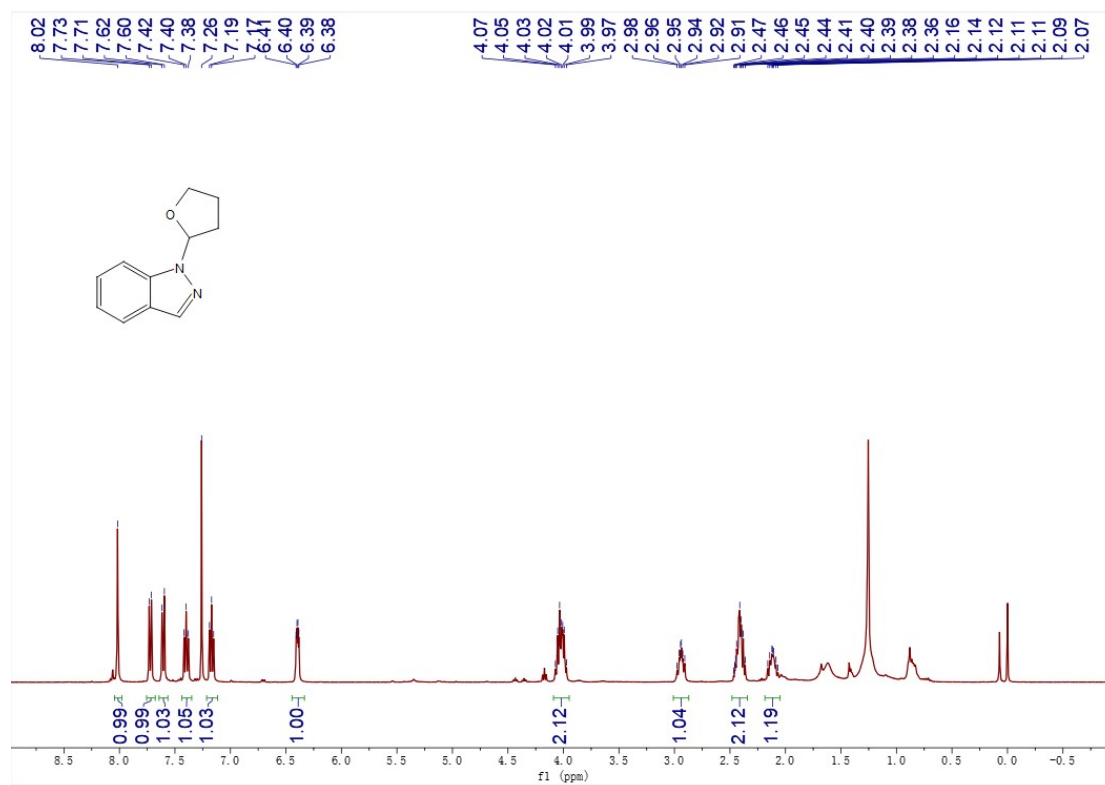

**2e-<sup>13</sup>C NMR (100 MHz, CDCl<sub>3</sub>)**

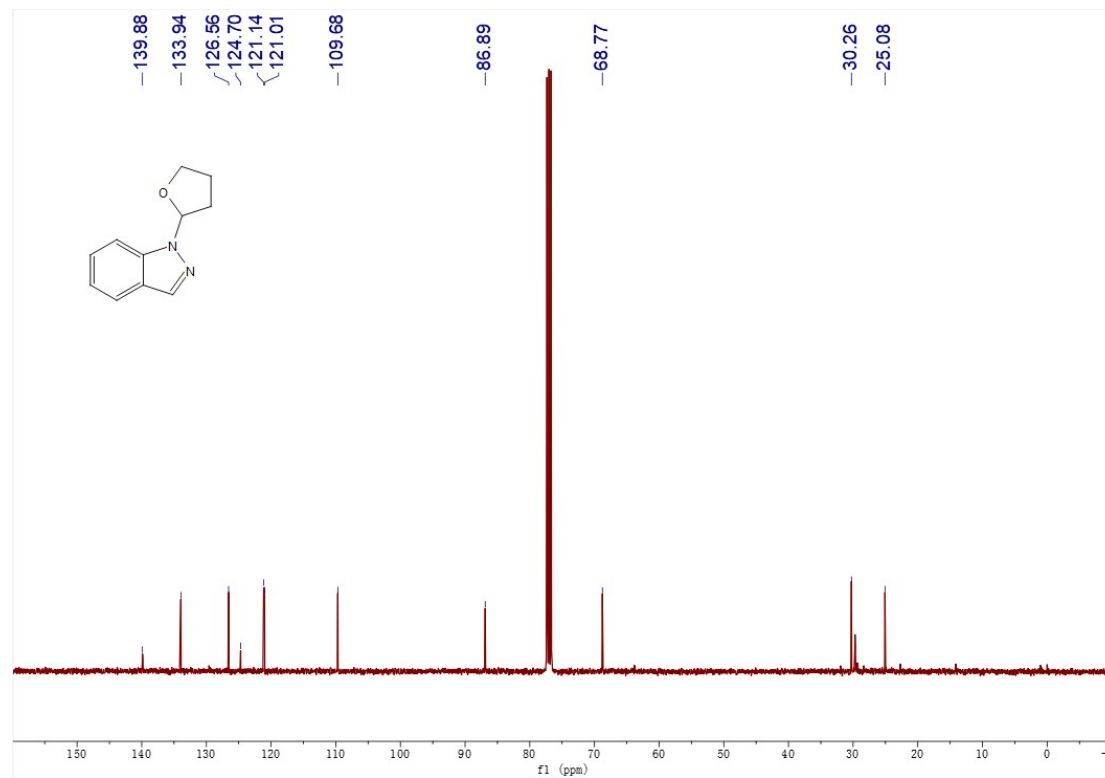

**2f-<sup>1</sup>H NMR (400 MHz, CDCl<sub>3</sub>)**

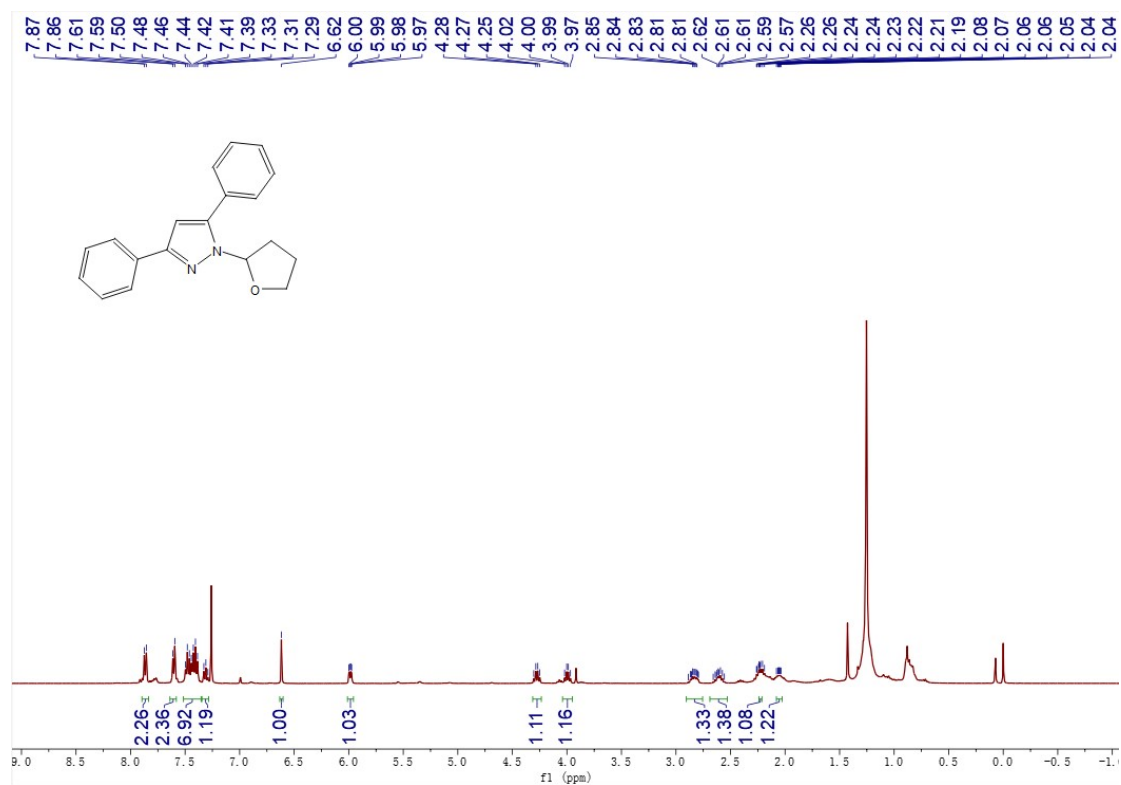

**2f-<sup>13</sup>C NMR (100 MHz, CDCl<sub>3</sub>)**

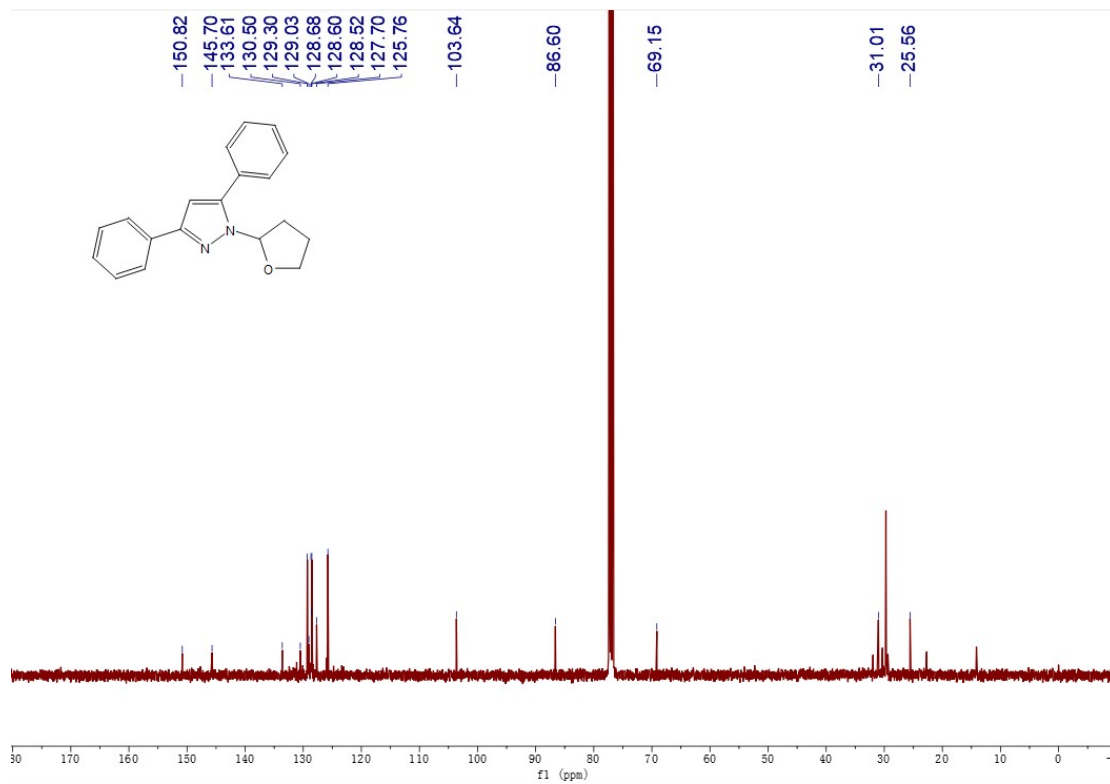



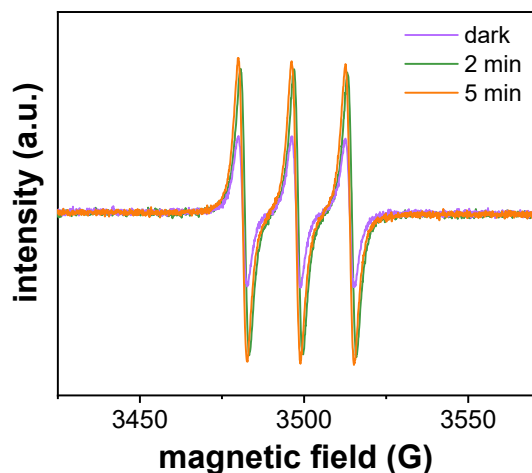

**Figure S23.** EPR spectra for TEMPO in acetonitrile (3 mL) with Zr-MOF (10 mg) under air atmosphere in the dark or upon white CFL light irradiation for 2 and 5 min. The signals were significantly strengthened after 2 min of light, and still not weakened at 5 min of light, which verified the presence of single-linear oxygen.

**Table S22.** Simulated UV-vis spectra for different units

| Zr <sub>6</sub> -L |           | Zr <sub>6</sub> -L-radical |           | Zr <sub>6</sub> -L-O <sub>2</sub> |           | Zr <sub>6</sub> -L-O <sub>2</sub> -radical |           | Zr <sub>6</sub> -L-hv |           | Zr <sub>6</sub> -L-hv-biradical |           |
|--------------------|-----------|----------------------------|-----------|-----------------------------------|-----------|--------------------------------------------|-----------|-----------------------|-----------|---------------------------------|-----------|
| wavelength         | intensity | wavelength                 | intensity | wavelength                        | intensity | wavelength                                 | intensity | wavelength            | intensity | wavelength                      | intensity |
| 496                | 3.75E-04  | 494                        | 0.00434   | 519                               | 5.00E-04  | 473                                        | 0.00123   | 383                   | 2.13E-04  | 479                             | 1.02E-04  |
| 496.1275           | 3.85E-04  | 494.15                     | 0.0045    | 519.13                            | 5.14E-04  | 473.164                                    | 0.00127   | 383.256               | 2.26E-04  | 479.3635                        | 1.14E-04  |
| 496.255            | 3.95E-04  | 494.3                      | 0.00466   | 519.26                            | 5.27E-04  | 473.328                                    | 0.00131   | 383.512               | 2.40E-04  | 479.727                         | 1.27E-04  |
| 496.3825           | 4.05E-04  | 494.45                     | 0.00483   | 519.39                            | 5.41E-04  | 473.492                                    | 0.00136   | 383.768               | 2.55E-04  | 480.0905                        | 1.41E-04  |
| 496.51             | 4.15E-04  | 494.6                      | 0.005     | 519.52                            | 5.55E-04  | 473.656                                    | 0.0014    | 384.024               | 2.71E-04  | 480.454                         | 1.57E-04  |
| 496.6375           | 4.26E-04  | 494.75                     | 0.00518   | 519.65                            | 5.70E-04  | 473.82                                     | 0.00145   | 384.28                | 2.88E-04  | 480.8175                        | 1.75E-04  |
| 496.765            | 4.36E-04  | 494.9                      | 0.00536   | 519.78                            | 5.85E-04  | 473.984                                    | 0.00149   | 384.536               | 3.05E-04  | 481.181                         | 1.95E-04  |
| 496.8925           | 4.47E-04  | 495.05                     | 0.00555   | 519.91                            | 6.00E-04  | 474.148                                    | 0.00154   | 384.792               | 3.23E-04  | 481.5445                        | 2.17E-04  |
| 497.02             | 4.58E-04  | 495.2                      | 0.00574   | 520.04                            | 6.15E-04  | 474.312                                    | 0.00159   | 385.048               | 3.43E-04  | 481.908                         | 2.41E-04  |
| 497.1475           | 4.70E-04  | 495.35                     | 0.00594   | 520.17                            | 6.31E-04  | 474.476                                    | 0.00164   | 385.304               | 3.63E-04  | 482.2715                        | 2.67E-04  |
| 497.275            | 4.81E-04  | 495.5                      | 0.00615   | 520.3                             | 6.47E-04  | 474.64                                     | 0.00169   | 385.56                | 3.84E-04  | 482.635                         | 2.97E-04  |
| 497.4025           | 4.93E-04  | 495.65                     | 0.00636   | 520.43                            | 6.63E-04  | 474.804                                    | 0.00174   | 385.816               | 4.06E-04  | 482.9985                        | 3.30E-04  |
| 497.53             | 5.05E-04  | 495.8                      | 0.00657   | 520.56                            | 6.79E-04  | 474.968                                    | 0.0018    | 386.072               | 4.30E-04  | 483.362                         | 3.66E-04  |
| 497.6575           | 5.17E-04  | 495.95                     | 0.0068    | 520.69                            | 6.96E-04  | 475.132                                    | 0.00185   | 386.328               | 4.54E-04  | 483.7255                        | 4.06E-04  |
| 497.785            | 5.29E-04  | 496.1                      | 0.00702   | 520.82                            | 7.13E-04  | 475.296                                    | 0.00191   | 386.584               | 4.80E-04  | 484.089                         | 4.50E-04  |
| 497.9125           | 5.42E-04  | 496.25                     | 0.00726   | 520.95                            | 7.31E-04  | 475.46                                     | 0.00196   | 386.84                | 5.07E-04  | 484.4525                        | 4.98E-04  |
| 498.04             | 5.55E-04  | 496.4                      | 0.0075    | 521.08                            | 7.49E-04  | 475.624                                    | 0.00202   | 387.096               | 5.35E-04  | 484.816                         | 5.52E-04  |
| 498.1675           | 5.68E-04  | 496.55                     | 0.00775   | 521.21                            | 7.67E-04  | 475.788                                    | 0.00208   | 387.352               | 5.65E-04  | 485.1795                        | 6.11E-04  |
| 498.295            | 5.81E-04  | 496.7                      | 0.008     | 521.34                            | 7.85E-04  | 475.952                                    | 0.00214   | 387.608               | 5.95E-04  | 485.543                         | 6.76E-04  |
| 498.4225           | 5.94E-04  | 496.85                     | 0.00826   | 521.47                            | 8.04E-04  | 476.116                                    | 0.0022    | 387.864               | 6.28E-04  | 485.9065                        | 7.47E-04  |
| 498.55             | 6.08E-04  | 497                        | 0.00852   | 521.6                             | 8.23E-04  | 476.28                                     | 0.00227   | 388.12                | 6.61E-04  | 486.27                          | 8.26E-04  |
| 498.6775           | 6.22E-04  | 497.15                     | 0.0088    | 521.73                            | 8.42E-04  | 476.444                                    | 0.00233   | 388.376               | 6.96E-04  | 486.6335                        | 9.12E-04  |
| 498.805            | 6.36E-04  | 497.3                      | 0.00907   | 521.86                            | 8.61E-04  | 476.608                                    | 0.0024    | 388.632               | 7.33E-04  | 486.997                         | 0.00101   |
| 498.9325           | 6.50E-04  | 497.45                     | 0.00936   | 521.99                            | 8.81E-04  | 476.772                                    | 0.00246   | 388.888               | 7.72E-04  | 487.3605                        | 0.00111   |
| 499.06             | 6.65E-04  | 497.6                      | 0.00965   | 522.12                            | 9.02E-04  | 476.936                                    | 0.00253   | 389.144               | 8.11E-04  | 487.724                         | 0.00122   |
| 499.1875           | 6.79E-04  | 497.75                     | 0.00995   | 522.25                            | 9.22E-04  | 477.1                                      | 0.0026    | 389.4                 | 8.53E-04  | 488.0875                        | 0.00135   |
| 499.315            | 6.94E-04  | 497.9                      | 0.01026   | 522.38                            | 9.43E-04  | 477.264                                    | 0.00267   | 389.656               | 8.97E-04  | 488.451                         | 0.00148   |

|          |          |        |         |        |          |         |         |         |          |          |         |
|----------|----------|--------|---------|--------|----------|---------|---------|---------|----------|----------|---------|
| 499.4425 | 7.09E-04 | 498.05 | 0.01057 | 522.51 | 9.64E-04 | 477.428 | 0.00274 | 389.912 | 9.42E-04 | 488.8145 | 0.00163 |
| 499.57   | 7.25E-04 | 498.2  | 0.01089 | 522.64 | 9.86E-04 | 477.592 | 0.00281 | 390.168 | 9.89E-04 | 489.178  | 0.00179 |
| 499.6975 | 7.40E-04 | 498.35 | 0.01122 | 522.77 | 0.00101  | 477.756 | 0.00288 | 390.424 | 0.00104  | 489.5415 | 0.00197 |
| 499.825  | 7.56E-04 | 498.5  | 0.01156 | 522.9  | 0.00103  | 477.92  | 0.00296 | 390.68  | 0.00109  | 489.905  | 0.00216 |
| 499.9525 | 7.72E-04 | 498.65 | 0.0119  | 523.03 | 0.00105  | 478.084 | 0.00304 | 390.936 | 0.00114  | 490.2685 | 0.00237 |
| 500.08   | 7.88E-04 | 498.8  | 0.01225 | 523.16 | 0.00107  | 478.248 | 0.00311 | 391.192 | 0.0012   | 490.632  | 0.0026  |
| 500.2075 | 8.05E-04 | 498.95 | 0.01261 | 523.29 | 0.0011   | 478.412 | 0.00319 | 391.448 | 0.00125  | 490.9955 | 0.00285 |
| 500.335  | 8.21E-04 | 499.1  | 0.01298 | 523.42 | 0.00112  | 478.576 | 0.00327 | 391.704 | 0.00131  | 491.359  | 0.00311 |
| 500.4625 | 8.38E-04 | 499.25 | 0.01335 | 523.55 | 0.00115  | 478.74  | 0.00335 | 391.96  | 0.00138  | 491.7225 | 0.0034  |
| 500.59   | 8.55E-04 | 499.4  | 0.01373 | 523.68 | 0.00117  | 478.904 | 0.00343 | 392.216 | 0.00144  | 492.086  | 0.00372 |
| 500.7175 | 8.73E-04 | 499.55 | 0.01412 | 523.81 | 0.00119  | 479.068 | 0.00351 | 392.472 | 0.00151  | 492.4495 | 0.00406 |
| 500.845  | 8.90E-04 | 499.7  | 0.01452 | 523.94 | 0.00122  | 479.232 | 0.0036  | 392.728 | 0.00158  | 492.813  | 0.00442 |
| 500.9725 | 9.08E-04 | 499.85 | 0.01492 | 524.07 | 0.00124  | 479.396 | 0.00368 | 392.984 | 0.00165  | 493.1765 | 0.00482 |
| 501.1    | 9.26E-04 | 500    | 0.01533 | 524.2  | 0.00127  | 479.56  | 0.00376 | 393.24  | 0.00172  | 493.54   | 0.00524 |
| 501.2275 | 9.44E-04 | 500.15 | 0.01575 | 524.33 | 0.00129  | 479.724 | 0.00385 | 393.496 | 0.0018   | 493.9035 | 0.0057  |
| 501.355  | 9.62E-04 | 500.3  | 0.01618 | 524.46 | 0.00132  | 479.888 | 0.00394 | 393.752 | 0.00188  | 494.267  | 0.00619 |
| 501.4825 | 9.80E-04 | 500.45 | 0.01662 | 524.59 | 0.00135  | 480.052 | 0.00403 | 394.008 | 0.00196  | 494.6305 | 0.00671 |
| 501.61   | 9.99E-04 | 500.6  | 0.01706 | 524.72 | 0.00137  | 480.216 | 0.00412 | 394.264 | 0.00205  | 494.994  | 0.00728 |
| 501.7375 | 0.00102  | 500.75 | 0.01752 | 524.85 | 0.0014   | 480.38  | 0.00421 | 394.52  | 0.00213  | 495.3575 | 0.00788 |
| 501.865  | 0.00104  | 500.9  | 0.01798 | 524.98 | 0.00143  | 480.544 | 0.0043  | 394.776 | 0.00223  | 495.721  | 0.00853 |
| 501.9925 | 0.00106  | 501.05 | 0.01844 | 525.11 | 0.00145  | 480.708 | 0.00439 | 395.032 | 0.00232  | 496.0845 | 0.00922 |
| 502.12   | 0.00108  | 501.2  | 0.01892 | 525.24 | 0.00148  | 480.872 | 0.00448 | 395.288 | 0.00242  | 496.448  | 0.00995 |
| 502.2475 | 0.0011   | 501.35 | 0.01941 | 525.37 | 0.00151  | 481.036 | 0.00457 | 395.544 | 0.00252  | 496.8115 | 0.01073 |
| 502.375  | 0.00112  | 501.5  | 0.0199  | 525.5  | 0.00154  | 481.2   | 0.00467 | 395.8   | 0.00263  | 497.175  | 0.01156 |
| 502.5025 | 0.00114  | 501.65 | 0.0204  | 525.63 | 0.00157  | 481.364 | 0.00476 | 396.056 | 0.00273  | 497.5385 | 0.01245 |
| 502.63   | 0.00116  | 501.8  | 0.02091 | 525.76 | 0.0016   | 481.528 | 0.00486 | 396.312 | 0.00285  | 497.902  | 0.01338 |
| 502.7575 | 0.00118  | 501.95 | 0.02143 | 525.89 | 0.00162  | 481.692 | 0.00495 | 396.568 | 0.00296  | 498.2655 | 0.01438 |
| 502.885  | 0.0012   | 502.1  | 0.02195 | 526.02 | 0.00165  | 481.856 | 0.00505 | 396.824 | 0.00308  | 498.629  | 0.01543 |
| 503.0125 | 0.00122  | 502.25 | 0.02248 | 526.15 | 0.00168  | 482.02  | 0.00515 | 397.08  | 0.0032   | 498.9925 | 0.01653 |
| 503.14   | 0.00124  | 502.4  | 0.02302 | 526.28 | 0.00171  | 482.184 | 0.00524 | 397.336 | 0.00333  | 499.356  | 0.0177  |
| 503.2675 | 0.00126  | 502.55 | 0.02357 | 526.41 | 0.00174  | 482.348 | 0.00534 | 397.592 | 0.00346  | 499.7195 | 0.01893 |
| 503.395  | 0.00128  | 502.7  | 0.02413 | 526.54 | 0.00177  | 482.512 | 0.00544 | 397.848 | 0.0036   | 500.083  | 0.02023 |
| 503.5225 | 0.0013   | 502.85 | 0.02469 | 526.67 | 0.0018   | 482.676 | 0.00554 | 398.104 | 0.00374  | 500.4465 | 0.02159 |
| 503.65   | 0.00132  | 503    | 0.02526 | 526.8  | 0.00184  | 482.84  | 0.00564 | 398.36  | 0.00388  | 500.81   | 0.02302 |
| 503.7775 | 0.00134  | 503.15 | 0.02584 | 526.93 | 0.00187  | 483.004 | 0.00574 | 398.616 | 0.00403  | 501.1735 | 0.02451 |
| 503.905  | 0.00137  | 503.3  | 0.02643 | 527.06 | 0.0019   | 483.168 | 0.00584 | 398.872 | 0.00418  | 501.537  | 0.02607 |
| 504.0325 | 0.00139  | 503.45 | 0.02702 | 527.19 | 0.00193  | 483.332 | 0.00594 | 399.128 | 0.00434  | 501.9005 | 0.0277  |
| 504.16   | 0.00141  | 503.6  | 0.02763 | 527.32 | 0.00196  | 483.496 | 0.00604 | 399.384 | 0.00451  | 502.264  | 0.02941 |
| 504.2875 | 0.00143  | 503.75 | 0.02823 | 527.45 | 0.00199  | 483.66  | 0.00614 | 399.64  | 0.00468  | 502.6275 | 0.03118 |
| 504.415  | 0.00145  | 503.9  | 0.02885 | 527.58 | 0.00203  | 483.824 | 0.00624 | 399.896 | 0.00485  | 502.991  | 0.03302 |
| 504.5425 | 0.00148  | 504.05 | 0.02947 | 527.71 | 0.00206  | 483.988 | 0.00634 | 400.152 | 0.00503  | 503.3545 | 0.03493 |
| 504.67   | 0.0015   | 504.2  | 0.0301  | 527.84 | 0.00209  | 484.152 | 0.00644 | 400.408 | 0.00521  | 503.718  | 0.03691 |
| 504.7975 | 0.00152  | 504.35 | 0.03074 | 527.97 | 0.00212  | 484.316 | 0.00654 | 400.664 | 0.0054   | 504.0815 | 0.03896 |
| 504.925  | 0.00155  | 504.5  | 0.03138 | 528.1  | 0.00216  | 484.48  | 0.00664 | 400.92  | 0.0056   | 504.445  | 0.04108 |
| 505.0525 | 0.00157  | 504.65 | 0.03203 | 528.23 | 0.00219  | 484.644 | 0.00674 | 401.176 | 0.0058   | 504.8085 | 0.04327 |
| 505.18   | 0.00159  | 504.8  | 0.03269 | 528.36 | 0.00222  | 484.808 | 0.00684 | 401.432 | 0.00601  | 505.172  | 0.04552 |
| 505.3075 | 0.00161  | 504.95 | 0.03335 | 528.49 | 0.00226  | 484.972 | 0.00694 | 401.688 | 0.00622  | 505.5355 | 0.04784 |
| 505.435  | 0.00164  | 505.1  | 0.03402 | 528.62 | 0.00229  | 485.136 | 0.00704 | 401.944 | 0.00644  | 505.899  | 0.05022 |
| 505.5625 | 0.00166  | 505.25 | 0.0347  | 528.75 | 0.00233  | 485.3   | 0.00714 | 402.2   | 0.00667  | 506.2625 | 0.05265 |
| 505.69   | 0.00168  | 505.4  | 0.03538 | 528.88 | 0.00236  | 485.464 | 0.00723 | 402.456 | 0.00691  | 506.626  | 0.05515 |
| 505.8175 | 0.00171  | 505.55 | 0.03606 | 529.01 | 0.00239  | 485.628 | 0.00733 | 402.712 | 0.00715  | 506.9895 | 0.0577  |

|          |         |        |         |        |         |         |         |         |         |          |         |
|----------|---------|--------|---------|--------|---------|---------|---------|---------|---------|----------|---------|
| 505.945  | 0.00173 | 505.7  | 0.03675 | 529.14 | 0.00243 | 485.792 | 0.00743 | 402.968 | 0.0074  | 507.353  | 0.0603  |
| 506.0725 | 0.00175 | 505.85 | 0.03745 | 529.27 | 0.00246 | 485.956 | 0.00753 | 403.224 | 0.00765 | 507.7165 | 0.06295 |
| 506.2    | 0.00178 | 506    | 0.03815 | 529.4  | 0.0025  | 486.12  | 0.00762 | 403.48  | 0.00792 | 508.08   | 0.06564 |
| 506.3275 | 0.0018  | 506.15 | 0.03886 | 529.53 | 0.00253 | 486.284 | 0.00772 | 403.736 | 0.00819 | 508.4435 | 0.06837 |
| 506.455  | 0.00182 | 506.3  | 0.03957 | 529.66 | 0.00257 | 486.448 | 0.00781 | 403.992 | 0.00847 | 508.807  | 0.07114 |
| 506.5825 | 0.00185 | 506.45 | 0.04028 | 529.79 | 0.0026  | 486.612 | 0.00791 | 404.248 | 0.00875 | 509.1705 | 0.07393 |
| 506.71   | 0.00187 | 506.6  | 0.041   | 529.92 | 0.00264 | 486.776 | 0.008   | 404.504 | 0.00905 | 509.534  | 0.07676 |
| 506.8375 | 0.00189 | 506.75 | 0.04172 | 530.05 | 0.00267 | 486.94  | 0.00809 | 404.76  | 0.00936 | 509.8975 | 0.0796  |
| 506.965  | 0.00192 | 506.9  | 0.04245 | 530.18 | 0.00271 | 487.104 | 0.00818 | 405.016 | 0.00967 | 510.261  | 0.08247 |
| 507.0925 | 0.00194 | 507.05 | 0.04318 | 530.31 | 0.00274 | 487.268 | 0.00827 | 405.272 | 0.00999 | 510.6245 | 0.08534 |
| 507.22   | 0.00197 | 507.2  | 0.04391 | 530.44 | 0.00278 | 487.432 | 0.00836 | 405.528 | 0.01032 | 510.988  | 0.08822 |
| 507.3475 | 0.00199 | 507.35 | 0.04465 | 530.57 | 0.00281 | 487.596 | 0.00845 | 405.784 | 0.01067 | 511.3515 | 0.09109 |
| 507.475  | 0.00201 | 507.5  | 0.04538 | 530.7  | 0.00285 | 487.76  | 0.00854 | 406.04  | 0.01102 | 511.715  | 0.09396 |
| 507.6025 | 0.00204 | 507.65 | 0.04613 | 530.83 | 0.00288 | 487.924 | 0.00862 | 406.296 | 0.01138 | 512.0785 | 0.09682 |
| 507.73   | 0.00206 | 507.8  | 0.04687 | 530.96 | 0.00292 | 488.088 | 0.00871 | 406.552 | 0.01175 | 512.442  | 0.09966 |
| 507.8575 | 0.00208 | 507.95 | 0.04761 | 531.09 | 0.00295 | 488.252 | 0.00879 | 406.808 | 0.01213 | 512.8055 | 0.10248 |
| 507.985  | 0.00211 | 508.1  | 0.04836 | 531.22 | 0.00299 | 488.416 | 0.00887 | 407.064 | 0.01253 | 513.169  | 0.10527 |
| 508.1125 | 0.00213 | 508.25 | 0.04911 | 531.35 | 0.00302 | 488.58  | 0.00895 | 407.32  | 0.01293 | 513.5325 | 0.10802 |
| 508.24   | 0.00215 | 508.4  | 0.04985 | 531.48 | 0.00306 | 488.744 | 0.00903 | 407.576 | 0.01335 | 513.896  | 0.11073 |
| 508.3675 | 0.00218 | 508.55 | 0.0506  | 531.61 | 0.00309 | 488.908 | 0.00911 | 407.832 | 0.01378 | 514.2595 | 0.11339 |
| 508.495  | 0.0022  | 508.7  | 0.05135 | 531.74 | 0.00313 | 489.072 | 0.00918 | 408.088 | 0.01421 | 514.623  | 0.11601 |
| 508.6225 | 0.00222 | 508.85 | 0.0521  | 531.87 | 0.00316 | 489.236 | 0.00925 | 408.344 | 0.01467 | 514.9865 | 0.11856 |
| 508.75   | 0.00225 | 509    | 0.05285 | 532    | 0.0032  | 489.4   | 0.00933 | 408.6   | 0.01513 | 515.35   | 0.12105 |
| 508.8775 | 0.00227 | 509.15 | 0.0536  | 532.13 | 0.00323 | 489.564 | 0.0094  | 408.856 | 0.0156  | 515.7135 | 0.12347 |
| 509.005  | 0.00229 | 509.3  | 0.05434 | 532.26 | 0.00327 | 489.728 | 0.00947 | 409.112 | 0.01609 | 516.077  | 0.12582 |
| 509.1325 | 0.00231 | 509.45 | 0.05509 | 532.39 | 0.0033  | 489.892 | 0.00953 | 409.368 | 0.01659 | 516.4405 | 0.1281  |
| 509.26   | 0.00234 | 509.6  | 0.05584 | 532.52 | 0.00334 | 490.056 | 0.0096  | 409.624 | 0.01711 | 516.804  | 0.13029 |
| 509.3875 | 0.00236 | 509.75 | 0.05658 | 532.65 | 0.00337 | 490.22  | 0.00966 | 409.88  | 0.01764 | 517.1675 | 0.1324  |
| 509.515  | 0.00238 | 509.9  | 0.05732 | 532.78 | 0.0034  | 490.384 | 0.00972 | 410.136 | 0.01818 | 517.531  | 0.13442 |
| 509.6425 | 0.0024  | 510.05 | 0.05806 | 532.91 | 0.00344 | 490.548 | 0.00978 | 410.392 | 0.01873 | 517.8945 | 0.13635 |
| 509.77   | 0.00242 | 510.2  | 0.05879 | 533.04 | 0.00347 | 490.712 | 0.00984 | 410.648 | 0.0193  | 518.258  | 0.13819 |
| 509.8975 | 0.00245 | 510.35 | 0.05952 | 533.17 | 0.00351 | 490.876 | 0.0099  | 410.904 | 0.01988 | 518.6215 | 0.13993 |
| 510.025  | 0.00247 | 510.5  | 0.06025 | 533.3  | 0.00354 | 491.04  | 0.00995 | 411.16  | 0.02048 | 518.985  | 0.14158 |
| 510.1525 | 0.00249 | 510.65 | 0.06097 | 533.43 | 0.00357 | 491.204 | 0.01    | 411.416 | 0.02109 | 519.3485 | 0.14313 |
| 510.28   | 0.00251 | 510.8  | 0.06169 | 533.56 | 0.00361 | 491.368 | 0.01005 | 411.672 | 0.02171 | 519.712  | 0.14458 |
| 510.4075 | 0.00253 | 510.95 | 0.06241 | 533.69 | 0.00364 | 491.532 | 0.0101  | 411.928 | 0.02235 | 520.0755 | 0.14593 |
| 510.535  | 0.00255 | 511.1  | 0.06312 | 533.82 | 0.00367 | 491.696 | 0.01014 | 412.184 | 0.023   | 520.439  | 0.14718 |
| 510.6625 | 0.00257 | 511.25 | 0.06383 | 533.95 | 0.0037  | 491.86  | 0.01018 | 412.44  | 0.02367 | 520.8025 | 0.14833 |
| 510.79   | 0.00259 | 511.4  | 0.06453 | 534.08 | 0.00374 | 492.024 | 0.01023 | 412.696 | 0.02435 | 521.166  | 0.14939 |
| 510.9175 | 0.00261 | 511.55 | 0.06522 | 534.21 | 0.00377 | 492.188 | 0.01026 | 412.952 | 0.02504 | 521.5295 | 0.15035 |
| 511.045  | 0.00263 | 511.7  | 0.06591 | 534.34 | 0.0038  | 492.352 | 0.0103  | 413.208 | 0.02575 | 521.893  | 0.15122 |
| 511.1725 | 0.00265 | 511.85 | 0.06659 | 534.47 | 0.00383 | 492.516 | 0.01033 | 413.464 | 0.02648 | 522.2565 | 0.15199 |
| 511.3    | 0.00267 | 512    | 0.06726 | 534.6  | 0.00386 | 492.68  | 0.01037 | 413.72  | 0.02722 | 522.62   | 0.15268 |
| 511.4275 | 0.00269 | 512.15 | 0.06793 | 534.73 | 0.00389 | 492.844 | 0.0104  | 413.976 | 0.02797 | 522.9835 | 0.15328 |
| 511.555  | 0.00271 | 512.3  | 0.06859 | 534.86 | 0.00392 | 493.008 | 0.01042 | 414.232 | 0.02873 | 523.347  | 0.1538  |
| 511.6825 | 0.00273 | 512.45 | 0.06924 | 534.99 | 0.00396 | 493.172 | 0.01045 | 414.488 | 0.02951 | 523.7105 | 0.15424 |
| 511.81   | 0.00275 | 512.6  | 0.06988 | 535.12 | 0.00399 | 493.336 | 0.01047 | 414.744 | 0.03031 | 524.074  | 0.15461 |
| 511.9375 | 0.00277 | 512.75 | 0.07052 | 535.25 | 0.00402 | 493.5   | 0.01049 | 415     | 0.03111 | 524.4375 | 0.15491 |
| 512.065  | 0.00279 | 512.9  | 0.07114 | 535.38 | 0.00404 | 493.664 | 0.01051 | 415.256 | 0.03193 | 524.801  | 0.15514 |
| 512.1925 | 0.0028  | 513.05 | 0.07176 | 535.51 | 0.00407 | 493.828 | 0.01052 | 415.512 | 0.03276 | 525.1645 | 0.15532 |
| 512.32   | 0.00282 | 513.2  | 0.07236 | 535.64 | 0.0041  | 493.992 | 0.01054 | 415.768 | 0.03361 | 525.528  | 0.15543 |

|          |         |        |         |        |         |         |         |         |         |          |         |
|----------|---------|--------|---------|--------|---------|---------|---------|---------|---------|----------|---------|
| 512.4475 | 0.00284 | 513.35 | 0.07296 | 535.77 | 0.00413 | 494.156 | 0.01055 | 416.024 | 0.03446 | 525.8915 | 0.1555  |
| 512.575  | 0.00286 | 513.5  | 0.07355 | 535.9  | 0.00416 | 494.32  | 0.01056 | 416.28  | 0.03533 | 526.255  | 0.15553 |
| 512.7025 | 0.00287 | 513.65 | 0.07413 | 536.03 | 0.00419 | 494.484 | 0.01056 | 416.536 | 0.03621 | 526.6185 | 0.15552 |
| 512.83   | 0.00289 | 513.8  | 0.07469 | 536.16 | 0.00421 | 494.648 | 0.01057 | 416.792 | 0.03709 | 526.982  | 0.15547 |
| 512.9575 | 0.0029  | 513.95 | 0.07525 | 536.29 | 0.00424 | 494.812 | 0.01057 | 417.048 | 0.03799 | 527.3455 | 0.15539 |
| 513.085  | 0.00292 | 514.1  | 0.07579 | 536.42 | 0.00427 | 494.976 | 0.01057 | 417.304 | 0.0389  | 527.709  | 0.1553  |
| 513.2125 | 0.00293 | 514.25 | 0.07632 | 536.55 | 0.0043  | 495.14  | 0.01057 | 417.56  | 0.03982 | 528.0725 | 0.15518 |
| 513.34   | 0.00295 | 514.4  | 0.07684 | 536.68 | 0.00432 | 495.304 | 0.01056 | 417.816 | 0.04074 | 528.436  | 0.15506 |
| 513.4675 | 0.00296 | 514.55 | 0.07735 | 536.81 | 0.00435 | 495.468 | 0.01056 | 418.072 | 0.04167 | 528.7995 | 0.15492 |
| 513.595  | 0.00298 | 514.7  | 0.07784 | 536.94 | 0.00437 | 495.632 | 0.01055 | 418.328 | 0.04261 | 529.163  | 0.15478 |
| 513.7225 | 0.00299 | 514.85 | 0.07833 | 537.07 | 0.0044  | 495.796 | 0.01054 | 418.584 | 0.04355 | 529.5265 | 0.15465 |
| 513.85   | 0.00301 | 515    | 0.0788  | 537.2  | 0.00442 | 495.96  | 0.01052 | 418.84  | 0.0445  | 529.89   | 0.15452 |
| 513.9775 | 0.00302 | 515.15 | 0.07925 | 537.33 | 0.00444 | 496.124 | 0.01051 | 419.096 | 0.04546 | 530.2535 | 0.1544  |
| 514.105  | 0.00303 | 515.3  | 0.0797  | 537.46 | 0.00447 | 496.288 | 0.01049 | 419.352 | 0.04641 | 530.617  | 0.1543  |
| 514.2325 | 0.00305 | 515.45 | 0.08013 | 537.59 | 0.00449 | 496.452 | 0.01047 | 419.608 | 0.04737 | 530.9805 | 0.15421 |
| 514.36   | 0.00306 | 515.6  | 0.08054 | 537.72 | 0.00451 | 496.616 | 0.01045 | 419.864 | 0.04833 | 531.344  | 0.15414 |
| 514.4875 | 0.00307 | 515.75 | 0.08095 | 537.85 | 0.00454 | 496.78  | 0.01043 | 420.12  | 0.04929 | 531.7075 | 0.1541  |
| 514.615  | 0.00308 | 515.9  | 0.08134 | 537.98 | 0.00456 | 496.944 | 0.0104  | 420.376 | 0.05025 | 532.071  | 0.15408 |
| 514.7425 | 0.00309 | 516.05 | 0.08171 | 538.11 | 0.00458 | 497.108 | 0.01037 | 420.632 | 0.05121 | 532.4345 | 0.15409 |
| 514.87   | 0.0031  | 516.2  | 0.08207 | 538.24 | 0.0046  | 497.272 | 0.01034 | 420.888 | 0.05217 | 532.798  | 0.15412 |
| 514.9975 | 0.00311 | 516.35 | 0.08241 | 538.37 | 0.00462 | 497.436 | 0.01031 | 421.144 | 0.05312 | 533.1615 | 0.15419 |
| 515.125  | 0.00312 | 516.5  | 0.08274 | 538.5  | 0.00464 | 497.6   | 0.01028 | 421.4   | 0.05407 | 533.525  | 0.15429 |
| 515.2525 | 0.00313 | 516.65 | 0.08306 | 538.63 | 0.00466 | 497.764 | 0.01024 | 421.656 | 0.05501 | 533.8885 | 0.15441 |
| 515.38   | 0.00314 | 516.8  | 0.08336 | 538.76 | 0.00468 | 497.928 | 0.01021 | 421.912 | 0.05595 | 534.252  | 0.15457 |
| 515.5075 | 0.00315 | 516.95 | 0.08364 | 538.89 | 0.0047  | 498.092 | 0.01017 | 422.168 | 0.05688 | 534.6155 | 0.15475 |
| 515.635  | 0.00316 | 517.1  | 0.08391 | 539.02 | 0.00472 | 498.256 | 0.01013 | 422.424 | 0.0578  | 534.979  | 0.15496 |
| 515.7625 | 0.00317 | 517.25 | 0.08416 | 539.15 | 0.00473 | 498.42  | 0.01009 | 422.68  | 0.05871 | 535.3425 | 0.1552  |
| 515.89   | 0.00318 | 517.4  | 0.0844  | 539.28 | 0.00475 | 498.584 | 0.01004 | 422.936 | 0.0596  | 535.706  | 0.15546 |
| 516.0175 | 0.00318 | 517.55 | 0.08462 | 539.41 | 0.00477 | 498.748 | 0.01    | 423.192 | 0.06049 | 536.0695 | 0.15575 |
| 516.145  | 0.00319 | 517.7  | 0.08483 | 539.54 | 0.00478 | 498.912 | 0.00995 | 423.448 | 0.06136 | 536.433  | 0.15605 |
| 516.2725 | 0.0032  | 517.85 | 0.08502 | 539.67 | 0.0048  | 499.076 | 0.0099  | 423.704 | 0.06221 | 536.7965 | 0.15636 |
| 516.4    | 0.0032  | 518    | 0.08519 | 539.8  | 0.00481 | 499.24  | 0.00985 | 423.96  | 0.06305 | 537.16   | 0.15669 |
| 516.5275 | 0.00321 | 518.15 | 0.08535 | 539.93 | 0.00483 | 499.404 | 0.0098  | 424.216 | 0.06387 | 537.5235 | 0.15703 |
| 516.655  | 0.00321 | 518.3  | 0.08549 | 540.06 | 0.00484 | 499.568 | 0.00975 | 424.472 | 0.06467 | 537.887  | 0.15736 |
| 516.7825 | 0.00322 | 518.45 | 0.08562 | 540.19 | 0.00486 | 499.732 | 0.0097  | 424.728 | 0.06546 | 538.2505 | 0.1577  |
| 516.91   | 0.00322 | 518.6  | 0.08573 | 540.32 | 0.00487 | 499.896 | 0.00964 | 424.984 | 0.06622 | 538.614  | 0.15803 |
| 517.0375 | 0.00323 | 518.75 | 0.08582 | 540.45 | 0.00488 | 500.06  | 0.00959 | 425.24  | 0.06696 | 538.9775 | 0.15835 |
| 517.165  | 0.00323 | 518.9  | 0.0859  | 540.58 | 0.0049  | 500.224 | 0.00953 | 425.496 | 0.06767 | 539.341  | 0.15866 |
| 517.2925 | 0.00324 | 519.05 | 0.08596 | 540.71 | 0.00491 | 500.388 | 0.00947 | 425.752 | 0.06837 | 539.7045 | 0.15894 |
| 517.42   | 0.00324 | 519.2  | 0.086   | 540.84 | 0.00492 | 500.552 | 0.00942 | 426.008 | 0.06903 | 540.068  | 0.1592  |
| 517.5475 | 0.00324 | 519.35 | 0.08603 | 540.97 | 0.00493 | 500.716 | 0.00936 | 426.264 | 0.06968 | 540.4315 | 0.15943 |
| 517.675  | 0.00324 | 519.5  | 0.08604 | 541.1  | 0.00494 | 500.88  | 0.0093  | 426.52  | 0.07029 | 540.795  | 0.15962 |
| 517.8025 | 0.00325 | 519.65 | 0.08604 | 541.23 | 0.00495 | 501.044 | 0.00923 | 426.776 | 0.07087 | 541.1585 | 0.15977 |
| 517.93   | 0.00325 | 519.8  | 0.08602 | 541.36 | 0.00496 | 501.208 | 0.00917 | 427.032 | 0.07143 | 541.522  | 0.15986 |
| 518.0575 | 0.00325 | 519.95 | 0.08598 | 541.49 | 0.00497 | 501.372 | 0.00911 | 427.288 | 0.07196 | 541.8855 | 0.15991 |
| 518.185  | 0.00325 | 520.1  | 0.08593 | 541.62 | 0.00498 | 501.536 | 0.00905 | 427.544 | 0.07245 | 542.249  | 0.1599  |
| 518.3125 | 0.00325 | 520.25 | 0.08586 | 541.75 | 0.00499 | 501.7   | 0.00898 | 427.8   | 0.07292 | 542.6125 | 0.15982 |
| 518.44   | 0.00325 | 520.4  | 0.08578 | 541.88 | 0.005   | 501.864 | 0.00892 | 428.056 | 0.07335 | 542.976  | 0.15968 |
| 518.5675 | 0.00325 | 520.55 | 0.08568 | 542.01 | 0.005   | 502.028 | 0.00885 | 428.312 | 0.07375 | 543.3395 | 0.15947 |
| 518.695  | 0.00325 | 520.7  | 0.08556 | 542.14 | 0.00501 | 502.192 | 0.00879 | 428.568 | 0.07411 | 543.703  | 0.15917 |
| 518.8225 | 0.00325 | 520.85 | 0.08543 | 542.27 | 0.00502 | 502.356 | 0.00872 | 428.824 | 0.07445 | 544.0665 | 0.1588  |

|          |         |        |         |        |         |         |         |         |         |          |         |
|----------|---------|--------|---------|--------|---------|---------|---------|---------|---------|----------|---------|
| 518.95   | 0.00325 | 521    | 0.08528 | 542.4  | 0.00503 | 502.52  | 0.00865 | 429.08  | 0.07474 | 544.43   | 0.15834 |
| 519.0775 | 0.00325 | 521.15 | 0.08512 | 542.53 | 0.00503 | 502.684 | 0.00859 | 429.336 | 0.075   | 544.7935 | 0.1578  |
| 519.205  | 0.00325 | 521.3  | 0.08495 | 542.66 | 0.00504 | 502.848 | 0.00852 | 429.592 | 0.07523 | 545.157  | 0.15716 |
| 519.3325 | 0.00324 | 521.45 | 0.08476 | 542.79 | 0.00504 | 503.012 | 0.00845 | 429.848 | 0.07542 | 545.5205 | 0.15643 |
| 519.46   | 0.00324 | 521.6  | 0.08455 | 542.92 | 0.00505 | 503.176 | 0.00839 | 430.104 | 0.07557 | 545.884  | 0.1556  |
| 519.5875 | 0.00324 | 521.75 | 0.08433 | 543.05 | 0.00505 | 503.34  | 0.00832 | 430.36  | 0.07569 | 546.2475 | 0.15467 |
| 519.715  | 0.00323 | 521.9  | 0.08409 | 543.18 | 0.00505 | 503.504 | 0.00825 | 430.616 | 0.07577 | 546.611  | 0.15365 |
| 519.8425 | 0.00323 | 522.05 | 0.08384 | 543.31 | 0.00506 | 503.668 | 0.00819 | 430.872 | 0.07582 | 546.9745 | 0.15252 |
| 519.97   | 0.00323 | 522.2  | 0.08358 | 543.44 | 0.00506 | 503.832 | 0.00812 | 431.128 | 0.07582 | 547.338  | 0.15129 |
| 520.0975 | 0.00322 | 522.35 | 0.0833  | 543.57 | 0.00506 | 503.996 | 0.00805 | 431.384 | 0.07579 | 547.7015 | 0.14996 |
| 520.225  | 0.00322 | 522.5  | 0.08301 | 543.7  | 0.00507 | 504.16  | 0.00799 | 431.64  | 0.07573 | 548.065  | 0.14853 |
| 520.3525 | 0.00321 | 522.65 | 0.0827  | 543.83 | 0.00507 | 504.324 | 0.00792 | 431.896 | 0.07562 | 548.4285 | 0.147   |
| 520.48   | 0.00321 | 522.8  | 0.08238 | 543.96 | 0.00507 | 504.488 | 0.00785 | 432.152 | 0.07549 | 548.792  | 0.14537 |
| 520.6075 | 0.0032  | 522.95 | 0.08205 | 544.09 | 0.00507 | 504.652 | 0.00779 | 432.408 | 0.07531 | 549.1555 | 0.14364 |
| 520.735  | 0.0032  | 523.1  | 0.08171 | 544.22 | 0.00507 | 504.816 | 0.00772 | 432.664 | 0.0751  | 549.519  | 0.14181 |
| 520.8625 | 0.00319 | 523.25 | 0.08135 | 544.35 | 0.00508 | 504.98  | 0.00766 | 432.92  | 0.07485 | 549.8825 | 0.13989 |
| 520.99   | 0.00319 | 523.4  | 0.08098 | 544.48 | 0.00508 | 505.144 | 0.00759 | 433.176 | 0.07457 | 550.246  | 0.13788 |
| 521.1175 | 0.00318 | 523.55 | 0.0806  | 544.61 | 0.00508 | 505.308 | 0.00753 | 433.432 | 0.07426 | 550.6095 | 0.13578 |
| 521.245  | 0.00317 | 523.7  | 0.0802  | 544.74 | 0.00508 | 505.472 | 0.00747 | 433.688 | 0.07391 | 550.973  | 0.13359 |
| 521.3725 | 0.00317 | 523.85 | 0.0798  | 544.87 | 0.00508 | 505.636 | 0.0074  | 433.944 | 0.07353 | 551.3365 | 0.13133 |
| 521.5    | 0.00316 | 524    | 0.07938 | 545    | 0.00508 | 505.8   | 0.00734 | 434.2   | 0.07311 | 551.7    | 0.12899 |
| 521.6275 | 0.00315 | 524.15 | 0.07895 | 545.13 | 0.00507 | 505.964 | 0.00728 | 434.456 | 0.07267 | 552.0635 | 0.12657 |
| 521.755  | 0.00314 | 524.3  | 0.07851 | 545.26 | 0.00507 | 506.128 | 0.00722 | 434.712 | 0.07219 | 552.427  | 0.12409 |
| 521.8825 | 0.00314 | 524.45 | 0.07806 | 545.39 | 0.00507 | 506.292 | 0.00716 | 434.968 | 0.07168 | 552.7905 | 0.12155 |
| 522.01   | 0.00313 | 524.6  | 0.0776  | 545.52 | 0.00507 | 506.456 | 0.0071  | 435.224 | 0.07114 | 553.154  | 0.11895 |
| 522.1375 | 0.00312 | 524.75 | 0.07713 | 545.65 | 0.00507 | 506.62  | 0.00704 | 435.48  | 0.07058 | 553.5175 | 0.1163  |
| 522.265  | 0.00311 | 524.9  | 0.07665 | 545.78 | 0.00507 | 506.784 | 0.00699 | 435.736 | 0.06998 | 553.881  | 0.1136  |
| 522.3925 | 0.0031  | 525.05 | 0.07616 | 545.91 | 0.00507 | 506.948 | 0.00693 | 435.992 | 0.06936 | 554.2445 | 0.11086 |
| 522.52   | 0.00309 | 525.2  | 0.07566 | 546.04 | 0.00506 | 507.112 | 0.00687 | 436.248 | 0.06871 | 554.608  | 0.10808 |
| 522.6475 | 0.00308 | 525.35 | 0.07515 | 546.17 | 0.00506 | 507.276 | 0.00682 | 436.504 | 0.06804 | 554.9715 | 0.10527 |
| 522.775  | 0.00307 | 525.5  | 0.07463 | 546.3  | 0.00506 | 507.44  | 0.00677 | 436.76  | 0.06735 | 555.335  | 0.10244 |
| 522.9025 | 0.00306 | 525.65 | 0.0741  | 546.43 | 0.00505 | 507.604 | 0.00672 | 437.016 | 0.06663 | 555.6985 | 0.0996  |
| 523.03   | 0.00305 | 525.8  | 0.07357 | 546.56 | 0.00505 | 507.768 | 0.00667 | 437.272 | 0.06589 | 556.062  | 0.09674 |
| 523.1575 | 0.00304 | 525.95 | 0.07303 | 546.69 | 0.00505 | 507.932 | 0.00662 | 437.528 | 0.06513 | 556.4255 | 0.09387 |
| 523.285  | 0.00303 | 526.1  | 0.07247 | 546.82 | 0.00505 | 508.096 | 0.00657 | 437.784 | 0.06434 | 556.789  | 0.091   |
| 523.4125 | 0.00302 | 526.25 | 0.07192 | 546.95 | 0.00504 | 508.26  | 0.00652 | 438.04  | 0.06355 | 557.1525 | 0.08814 |
| 523.54   | 0.00301 | 526.4  | 0.07135 | 547.08 | 0.00504 | 508.424 | 0.00648 | 438.296 | 0.06273 | 557.516  | 0.08528 |
| 523.6675 | 0.003   | 526.55 | 0.07078 | 547.21 | 0.00503 | 508.588 | 0.00643 | 438.552 | 0.06189 | 557.8795 | 0.08244 |
| 523.795  | 0.00299 | 526.7  | 0.0702  | 547.34 | 0.00503 | 508.752 | 0.00639 | 438.808 | 0.06105 | 558.243  | 0.07962 |
| 523.9225 | 0.00298 | 526.85 | 0.06961 | 547.47 | 0.00503 | 508.916 | 0.00635 | 439.064 | 0.06018 | 558.6065 | 0.07682 |
| 524.05   | 0.00297 | 527    | 0.06902 | 547.6  | 0.00502 | 509.08  | 0.00631 | 439.32  | 0.05931 | 558.97   | 0.07405 |
| 524.1775 | 0.00296 | 527.15 | 0.06843 | 547.73 | 0.00502 | 509.244 | 0.00627 | 439.576 | 0.05842 | 559.3335 | 0.07132 |
| 524.305  | 0.00295 | 527.3  | 0.06782 | 547.86 | 0.00501 | 509.408 | 0.00623 | 439.832 | 0.05752 | 559.697  | 0.06862 |
| 524.4325 | 0.00294 | 527.45 | 0.06722 | 547.99 | 0.00501 | 509.572 | 0.0062  | 440.088 | 0.05661 | 560.0605 | 0.06596 |
| 524.56   | 0.00293 | 527.6  | 0.0666  | 548.12 | 0.00501 | 509.736 | 0.00616 | 440.344 | 0.0557  | 560.424  | 0.06335 |
| 524.6875 | 0.00292 | 527.75 | 0.06599 | 548.25 | 0.005   | 509.9   | 0.00613 | 440.6   | 0.05477 | 560.7875 | 0.06078 |
| 524.815  | 0.0029  | 527.9  | 0.06536 | 548.38 | 0.005   | 510.064 | 0.0061  | 440.856 | 0.05384 | 561.151  | 0.05826 |
| 524.9425 | 0.00289 | 528.05 | 0.06474 | 548.51 | 0.00499 | 510.228 | 0.00607 | 441.112 | 0.05291 | 561.5145 | 0.0558  |
| 525.07   | 0.00288 | 528.2  | 0.06411 | 548.64 | 0.00499 | 510.392 | 0.00604 | 441.368 | 0.05197 | 561.878  | 0.05339 |
| 525.1975 | 0.00287 | 528.35 | 0.06348 | 548.77 | 0.00498 | 510.556 | 0.00602 | 441.624 | 0.05102 | 562.2415 | 0.05104 |
| 525.325  | 0.00286 | 528.5  | 0.06284 | 548.9  | 0.00498 | 510.72  | 0.00599 | 441.88  | 0.05008 | 562.605  | 0.04875 |

|          |         |        |         |        |         |         |         |         |         |          |         |
|----------|---------|--------|---------|--------|---------|---------|---------|---------|---------|----------|---------|
| 525.4525 | 0.00285 | 528.65 | 0.0622  | 549.03 | 0.00498 | 510.884 | 0.00597 | 442.136 | 0.04913 | 562.9685 | 0.04653 |
| 525.58   | 0.00283 | 528.8  | 0.06156 | 549.16 | 0.00497 | 511.048 | 0.00595 | 442.392 | 0.04818 | 563.332  | 0.04436 |
| 525.7075 | 0.00282 | 528.95 | 0.06091 | 549.29 | 0.00497 | 511.212 | 0.00593 | 442.648 | 0.04723 | 563.6955 | 0.04226 |
| 525.835  | 0.00281 | 529.1  | 0.06027 | 549.42 | 0.00496 | 511.376 | 0.00591 | 442.904 | 0.04628 | 564.059  | 0.04022 |
| 525.9625 | 0.0028  | 529.25 | 0.05962 | 549.55 | 0.00496 | 511.54  | 0.0059  | 443.16  | 0.04534 | 564.4225 | 0.03825 |
| 526.09   | 0.00279 | 529.4  | 0.05897 | 549.68 | 0.00495 | 511.704 | 0.00588 | 443.416 | 0.0444  | 564.786  | 0.03635 |
| 526.2175 | 0.00277 | 529.55 | 0.05831 | 549.81 | 0.00495 | 511.868 | 0.00587 | 443.672 | 0.04346 | 565.1495 | 0.03451 |
| 526.345  | 0.00276 | 529.7  | 0.05766 | 549.94 | 0.00494 | 512.032 | 0.00586 | 443.928 | 0.04252 | 565.513  | 0.03274 |
| 526.4725 | 0.00275 | 529.85 | 0.057   | 550.07 | 0.00494 | 512.196 | 0.00585 | 444.184 | 0.04159 | 565.8765 | 0.03103 |
| 526.6    | 0.00274 | 530    | 0.05635 | 550.2  | 0.00494 | 512.36  | 0.00585 | 444.44  | 0.04067 | 566.24   | 0.02939 |
| 526.7275 | 0.00273 | 530.15 | 0.05569 | 550.33 | 0.00493 | 512.524 | 0.00584 | 444.696 | 0.03975 | 566.6035 | 0.02781 |
| 526.855  | 0.00272 | 530.3  | 0.05504 | 550.46 | 0.00493 | 512.688 | 0.00584 | 444.952 | 0.03884 | 566.967  | 0.0263  |
| 526.9825 | 0.0027  | 530.45 | 0.05438 | 550.59 | 0.00492 | 512.852 | 0.00584 | 445.208 | 0.03794 | 567.3305 | 0.02485 |
| 527.11   | 0.00269 | 530.6  | 0.05372 | 550.72 | 0.00492 | 513.016 | 0.00584 | 445.464 | 0.03705 | 567.694  | 0.02346 |
| 527.2375 | 0.00268 | 530.75 | 0.05307 | 550.85 | 0.00492 | 513.18  | 0.00585 | 445.72  | 0.03616 | 568.0575 | 0.02214 |
| 527.365  | 0.00267 | 530.9  | 0.05241 | 550.98 | 0.00491 | 513.344 | 0.00585 | 445.976 | 0.03529 | 568.421  | 0.02087 |
| 527.4925 | 0.00266 | 531.05 | 0.05176 | 551.11 | 0.00491 | 513.508 | 0.00586 | 446.232 | 0.03442 | 568.7845 | 0.01966 |
| 527.62   | 0.00265 | 531.2  | 0.0511  | 551.24 | 0.00491 | 513.672 | 0.00587 | 446.488 | 0.03357 | 569.148  | 0.01851 |
| 527.7475 | 0.00263 | 531.35 | 0.05045 | 551.37 | 0.0049  | 513.836 | 0.00588 | 446.744 | 0.03272 | 569.5115 | 0.01742 |
| 527.875  | 0.00262 | 531.5  | 0.0498  | 551.5  | 0.0049  | 514     | 0.0059  | 447     | 0.03189 | 569.875  | 0.01638 |
| 528.0025 | 0.00261 | 531.65 | 0.04915 | 551.63 | 0.0049  | 514.164 | 0.00592 | 447.256 | 0.03106 | 570.2385 | 0.0154  |
| 528.13   | 0.0026  | 531.8  | 0.0485  | 551.76 | 0.00489 | 514.328 | 0.00593 | 447.512 | 0.03025 | 570.602  | 0.01446 |
| 528.2575 | 0.00259 | 531.95 | 0.04786 | 551.89 | 0.00489 | 514.492 | 0.00595 | 447.768 | 0.02945 | 570.9655 | 0.01358 |
| 528.385  | 0.00258 | 532.1  | 0.04721 | 552.02 | 0.00489 | 514.656 | 0.00598 | 448.024 | 0.02867 | 571.329  | 0.01274 |
| 528.5125 | 0.00257 | 532.25 | 0.04657 | 552.15 | 0.00489 | 514.82  | 0.006   | 448.28  | 0.02789 | 571.6925 | 0.01195 |
| 528.64   | 0.00256 | 532.4  | 0.04593 | 552.28 | 0.00488 | 514.984 | 0.00603 | 448.536 | 0.02713 | 572.056  | 0.01121 |
| 528.7675 | 0.00255 | 532.55 | 0.0453  | 552.41 | 0.00488 | 515.148 | 0.00606 | 448.792 | 0.02638 | 572.4195 | 0.01051 |
| 528.895  | 0.00253 | 532.7  | 0.04466 | 552.54 | 0.00488 | 515.312 | 0.00609 | 449.048 | 0.02564 | 572.783  | 0.00985 |
| 529.0225 | 0.00252 | 532.85 | 0.04403 | 552.67 | 0.00488 | 515.476 | 0.00613 | 449.304 | 0.02492 | 573.1465 | 0.00923 |
| 529.15   | 0.00251 | 533    | 0.0434  | 552.8  | 0.00488 | 515.64  | 0.00616 | 449.56  | 0.02421 | 573.51   | 0.00865 |
| 529.2775 | 0.0025  | 533.15 | 0.04278 | 552.93 | 0.00487 | 515.804 | 0.0062  | 449.816 | 0.02351 | 573.8735 | 0.0081  |
| 529.405  | 0.00249 | 533.3  | 0.04216 | 553.06 | 0.00487 | 515.968 | 0.00625 | 450.072 | 0.02283 | 574.237  | 0.0076  |
| 529.5325 | 0.00248 | 533.45 | 0.04154 | 553.19 | 0.00487 | 516.132 | 0.00629 | 450.328 | 0.02216 | 574.6005 | 0.00712 |
| 529.66   | 0.00247 | 533.6  | 0.04093 | 553.32 | 0.00487 | 516.296 | 0.00634 | 450.584 | 0.02151 | 574.964  | 0.00668 |
| 529.7875 | 0.00246 | 533.75 | 0.04032 | 553.45 | 0.00487 | 516.46  | 0.00639 | 450.84  | 0.02086 | 575.3275 | 0.00628 |
| 529.915  | 0.00245 | 533.9  | 0.03971 | 553.58 | 0.00487 | 516.624 | 0.00644 | 451.096 | 0.02023 | 575.691  | 0.0059  |
| 530.0425 | 0.00244 | 534.05 | 0.03911 | 553.71 | 0.00487 | 516.788 | 0.00649 | 451.352 | 0.01962 | 576.0545 | 0.00555 |
| 530.17   | 0.00243 | 534.2  | 0.03851 | 553.84 | 0.00487 | 516.952 | 0.00655 | 451.608 | 0.01902 | 576.418  | 0.00523 |
| 530.2975 | 0.00243 | 534.35 | 0.03791 | 553.97 | 0.00486 | 517.116 | 0.00661 | 451.864 | 0.01843 | 576.7815 | 0.00493 |
| 530.425  | 0.00242 | 534.5  | 0.03733 | 554.1  | 0.00486 | 517.28  | 0.00667 | 452.12  | 0.01785 | 577.145  | 0.00466 |
| 530.5525 | 0.00241 | 534.65 | 0.03674 | 554.23 | 0.00486 | 517.444 | 0.00673 | 452.376 | 0.01729 | 577.5085 | 0.00442 |
| 530.68   | 0.0024  | 534.8  | 0.03616 | 554.36 | 0.00486 | 517.608 | 0.0068  | 452.632 | 0.01674 | 577.872  | 0.00419 |
| 530.8075 | 0.00239 | 534.95 | 0.03558 | 554.49 | 0.00486 | 517.772 | 0.00687 | 452.888 | 0.01621 | 578.2355 | 0.00399 |
| 530.935  | 0.00238 | 535.1  | 0.03501 | 554.62 | 0.00486 | 517.936 | 0.00695 | 453.144 | 0.01568 | 578.599  | 0.00382 |
| 531.0625 | 0.00237 | 535.25 | 0.03445 | 554.75 | 0.00486 | 518.1   | 0.00702 | 453.4   | 0.01517 | 578.9625 | 0.00366 |
| 531.19   | 0.00237 | 535.4  | 0.03389 | 554.88 | 0.00486 | 518.264 | 0.0071  | 453.656 | 0.01468 | 579.326  | 0.00352 |
| 531.3175 | 0.00236 | 535.55 | 0.03333 | 555.01 | 0.00486 | 518.428 | 0.00718 | 453.912 | 0.01419 | 579.6895 | 0.0034  |
| 531.445  | 0.00235 | 535.7  | 0.03278 | 555.14 | 0.00486 | 518.592 | 0.00727 | 454.168 | 0.01372 | 580.053  | 0.00329 |
| 531.5725 | 0.00234 | 535.85 | 0.03224 | 555.27 | 0.00486 | 518.756 | 0.00735 | 454.424 | 0.01326 | 580.4165 | 0.00321 |
| 531.7    | 0.00233 | 536    | 0.0317  | 555.4  | 0.00487 | 518.92  | 0.00744 | 454.68  | 0.01281 | 580.78   | 0.00314 |
| 531.8275 | 0.00233 | 536.15 | 0.03116 | 555.53 | 0.00487 | 519.084 | 0.00754 | 454.936 | 0.01238 | 581.1435 | 0.00308 |

|          |         |        |         |        |         |         |         |         |         |          |         |
|----------|---------|--------|---------|--------|---------|---------|---------|---------|---------|----------|---------|
| 531.955  | 0.00232 | 536.3  | 0.03063 | 555.66 | 0.00487 | 519.248 | 0.00763 | 455.192 | 0.01195 | 581.507  | 0.00304 |
| 532.0825 | 0.00231 | 536.45 | 0.03011 | 555.79 | 0.00487 | 519.412 | 0.00773 | 455.448 | 0.01154 | 581.8705 | 0.00302 |
| 532.21   | 0.00231 | 536.6  | 0.02959 | 555.92 | 0.00487 | 519.576 | 0.00784 | 455.704 | 0.01114 | 582.234  | 0.00301 |
| 532.3375 | 0.0023  | 536.75 | 0.02908 | 556.05 | 0.00487 | 519.74  | 0.00794 | 455.96  | 0.01075 | 582.5975 | 0.00301 |
| 532.465  | 0.00229 | 536.9  | 0.02857 | 556.18 | 0.00487 | 519.904 | 0.00805 | 456.216 | 0.01037 | 582.961  | 0.00302 |
| 532.5925 | 0.00229 | 537.05 | 0.02807 | 556.31 | 0.00487 | 520.068 | 0.00816 | 456.472 | 0.01    | 583.3245 | 0.00304 |
| 532.72   | 0.00228 | 537.2  | 0.02758 | 556.44 | 0.00487 | 520.232 | 0.00828 | 456.728 | 0.00965 | 583.688  | 0.00308 |
| 532.8475 | 0.00228 | 537.35 | 0.02709 | 556.57 | 0.00487 | 520.396 | 0.0084  | 456.984 | 0.0093  | 584.0515 | 0.00312 |
| 532.975  | 0.00227 | 537.5  | 0.0266  | 556.7  | 0.00487 | 520.56  | 0.00852 | 457.24  | 0.00896 | 584.415  | 0.00318 |
| 533.1025 | 0.00227 | 537.65 | 0.02613 | 556.83 | 0.00488 | 520.724 | 0.00865 | 457.496 | 0.00864 | 584.7785 | 0.00324 |
| 533.23   | 0.00226 | 537.8  | 0.02566 | 556.96 | 0.00488 | 520.888 | 0.00878 | 457.752 | 0.00832 | 585.142  | 0.00332 |
| 533.3575 | 0.00226 | 537.95 | 0.02519 | 557.09 | 0.00488 | 521.052 | 0.00891 | 458.008 | 0.00801 | 585.5055 | 0.0034  |
| 533.485  | 0.00225 | 538.1  | 0.02473 | 557.22 | 0.00488 | 521.216 | 0.00905 | 458.264 | 0.00772 | 585.869  | 0.00349 |
| 533.6125 | 0.00225 | 538.25 | 0.02428 | 557.35 | 0.00488 | 521.38  | 0.00919 | 458.52  | 0.00743 | 586.2325 | 0.00358 |
| 533.74   | 0.00224 | 538.4  | 0.02383 | 557.48 | 0.00488 | 521.544 | 0.00933 | 458.776 | 0.00715 | 586.596  | 0.00368 |
| 533.8675 | 0.00224 | 538.55 | 0.02339 | 557.61 | 0.00488 | 521.708 | 0.00948 | 459.032 | 0.00688 | 586.9595 | 0.00379 |
| 533.995  | 0.00224 | 538.7  | 0.02296 | 557.74 | 0.00488 | 521.872 | 0.00963 | 459.288 | 0.00662 | 587.323  | 0.0039  |
| 534.1225 | 0.00223 | 538.85 | 0.02253 | 557.87 | 0.00489 | 522.036 | 0.00979 | 459.544 | 0.00637 | 587.6865 | 0.00402 |
| 534.25   | 0.00223 | 539    | 0.02211 | 558    | 0.00489 | 522.2   | 0.00995 | 459.8   | 0.00612 | 588.05   | 0.00415 |
| 534.3775 | 0.00223 | 539.15 | 0.0217  | 558.13 | 0.00489 | 522.364 | 0.01011 | 460.056 | 0.00588 | 588.4135 | 0.00427 |
| 534.505  | 0.00223 | 539.3  | 0.02129 | 558.26 | 0.00489 | 522.528 | 0.01028 | 460.312 | 0.00565 | 588.777  | 0.0044  |
| 534.6325 | 0.00222 | 539.45 | 0.02089 | 558.39 | 0.00489 | 522.692 | 0.01045 | 460.568 | 0.00543 | 589.1405 | 0.00453 |
| 534.76   | 0.00222 | 539.6  | 0.02049 | 558.52 | 0.00489 | 522.856 | 0.01062 | 460.824 | 0.00522 | 589.504  | 0.00467 |
| 534.8875 | 0.00222 | 539.75 | 0.0201  | 558.65 | 0.00489 | 523.02  | 0.0108  | 461.08  | 0.00501 | 589.8675 | 0.00481 |
| 535.015  | 0.00222 | 539.9  | 0.01972 | 558.78 | 0.00489 | 523.184 | 0.01099 | 461.336 | 0.00481 | 590.231  | 0.00494 |
| 535.1425 | 0.00222 | 540.05 | 0.01934 | 558.91 | 0.00489 | 523.348 | 0.01117 | 461.592 | 0.00462 | 590.5945 | 0.00508 |
| 535.27   | 0.00221 | 540.2  | 0.01897 | 559.04 | 0.00489 | 523.512 | 0.01137 | 461.848 | 0.00443 | 590.958  | 0.00522 |
| 535.3975 | 0.00221 | 540.35 | 0.01861 | 559.17 | 0.00489 | 523.676 | 0.01156 | 462.104 | 0.00425 | 591.3215 | 0.00536 |
| 535.525  | 0.00221 | 540.5  | 0.01825 | 559.3  | 0.00489 | 523.84  | 0.01176 | 462.36  | 0.00408 | 591.685  | 0.00549 |
| 535.6525 | 0.00221 | 540.65 | 0.0179  | 559.43 | 0.00489 | 524.004 | 0.01197 | 462.616 | 0.00391 | 592.0485 | 0.00563 |
| 535.78   | 0.00221 | 540.8  | 0.01756 | 559.56 | 0.00489 | 524.168 | 0.01218 | 462.872 | 0.00375 | 592.412  | 0.00576 |
| 535.9075 | 0.00221 | 540.95 | 0.01722 | 559.69 | 0.00489 | 524.332 | 0.01239 | 463.128 | 0.0036  | 592.7755 | 0.00589 |
| 536.035  | 0.00221 | 541.1  | 0.01689 | 559.82 | 0.00489 | 524.496 | 0.01261 | 463.384 | 0.00345 | 593.139  | 0.00602 |
| 536.1625 | 0.00221 | 541.25 | 0.01656 | 559.95 | 0.00489 | 524.66  | 0.01283 | 463.64  | 0.0033  | 593.5025 | 0.00614 |
| 536.29   | 0.00221 | 541.4  | 0.01625 | 560.08 | 0.00489 | 524.824 | 0.01306 | 463.896 | 0.00317 | 593.866  | 0.00626 |
| 536.4175 | 0.00221 | 541.55 | 0.01594 | 560.21 | 0.00489 | 524.988 | 0.01329 | 464.152 | 0.00303 | 594.2295 | 0.00637 |
| 536.545  | 0.00221 | 541.7  | 0.01563 | 560.34 | 0.00489 | 525.152 | 0.01353 | 464.408 | 0.0029  | 594.593  | 0.00648 |
| 536.6725 | 0.00221 | 541.85 | 0.01533 | 560.47 | 0.00489 | 525.316 | 0.01377 | 464.664 | 0.00278 | 594.9565 | 0.00659 |
| 536.8    | 0.00222 | 542    | 0.01504 | 560.6  | 0.00489 | 525.48  | 0.01402 | 464.92  | 0.00266 | 595.32   | 0.00669 |
| 536.9275 | 0.00222 | 542.15 | 0.01476 | 560.73 | 0.00489 | 525.644 | 0.01427 | 465.176 | 0.00255 | 595.6835 | 0.00678 |
| 537.055  | 0.00222 | 542.3  | 0.01448 | 560.86 | 0.00488 | 525.808 | 0.01452 | 465.432 | 0.00244 | 596.047  | 0.00687 |
| 537.1825 | 0.00222 | 542.45 | 0.01421 | 560.99 | 0.00488 | 525.972 | 0.01478 | 465.688 | 0.00233 | 596.4105 | 0.00695 |
| 537.31   | 0.00222 | 542.6  | 0.01394 | 561.12 | 0.00488 | 526.136 | 0.01505 | 465.944 | 0.00223 | 596.774  | 0.00702 |
| 537.4375 | 0.00223 | 542.75 | 0.01369 | 561.25 | 0.00488 | 526.3   | 0.01532 | 466.2   | 0.00213 | 597.1375 | 0.00709 |
| 537.565  | 0.00223 | 542.9  | 0.01343 | 561.38 | 0.00487 | 526.464 | 0.01559 | 466.456 | 0.00204 | 597.501  | 0.00714 |
| 537.6925 | 0.00223 | 543.05 | 0.01319 | 561.51 | 0.00487 | 526.628 | 0.01587 | 466.712 | 0.00195 | 597.8645 | 0.00719 |
| 537.82   | 0.00224 | 543.2  | 0.01295 | 561.64 | 0.00487 | 526.792 | 0.01616 | 466.968 | 0.00186 | 598.228  | 0.00724 |
| 537.9475 | 0.00224 | 543.35 | 0.01272 | 561.77 | 0.00486 | 526.956 | 0.01644 | 467.224 | 0.00178 | 598.5915 | 0.00727 |
| 538.075  | 0.00224 | 543.5  | 0.0125  | 561.9  | 0.00486 | 527.12  | 0.01674 | 467.48  | 0.0017  | 598.955  | 0.0073  |
| 538.2025 | 0.00225 | 543.65 | 0.01228 | 562.03 | 0.00485 | 527.284 | 0.01704 | 467.736 | 0.00162 | 599.3185 | 0.00731 |
| 538.33   | 0.00225 | 543.8  | 0.01207 | 562.16 | 0.00485 | 527.448 | 0.01734 | 467.992 | 0.00155 | 599.682  | 0.00732 |

|          |         |        |         |        |         |         |         |         |          |          |         |
|----------|---------|--------|---------|--------|---------|---------|---------|---------|----------|----------|---------|
| 538.4575 | 0.00225 | 543.95 | 0.01186 | 562.29 | 0.00485 | 527.612 | 0.01765 | 468.248 | 0.00148  | 600.0455 | 0.00733 |
| 538.585  | 0.00226 | 544.1  | 0.01166 | 562.42 | 0.00484 | 527.776 | 0.01796 | 468.504 | 0.00141  | 600.409  | 0.00732 |
| 538.7125 | 0.00226 | 544.25 | 0.01147 | 562.55 | 0.00483 | 527.94  | 0.01828 | 468.76  | 0.00134  | 600.7725 | 0.0073  |
| 538.84   | 0.00227 | 544.4  | 0.01129 | 562.68 | 0.00483 | 528.104 | 0.0186  | 469.016 | 0.00128  | 601.136  | 0.00728 |
| 538.9675 | 0.00227 | 544.55 | 0.01111 | 562.81 | 0.00482 | 528.268 | 0.01893 | 469.272 | 0.00122  | 601.4995 | 0.00725 |
| 539.095  | 0.00228 | 544.7  | 0.01094 | 562.94 | 0.00482 | 528.432 | 0.01926 | 469.528 | 0.00116  | 601.863  | 0.00721 |
| 539.2225 | 0.00229 | 544.85 | 0.01078 | 563.07 | 0.00481 | 528.596 | 0.0196  | 469.784 | 0.00111  | 602.2265 | 0.00717 |
| 539.35   | 0.00229 | 545    | 0.01062 | 563.2  | 0.0048  | 528.76  | 0.01994 | 470.04  | 0.00106  | 602.59   | 0.00711 |
| 539.4775 | 0.0023  | 545.15 | 0.01047 | 563.33 | 0.00479 | 528.924 | 0.02028 | 470.296 | 0.00101  | 602.9535 | 0.00705 |
| 539.605  | 0.0023  | 545.3  | 0.01033 | 563.46 | 0.00479 | 529.088 | 0.02063 | 470.552 | 9.61E-04 | 603.317  | 0.00698 |
| 539.7325 | 0.00231 | 545.45 | 0.01019 | 563.59 | 0.00478 | 529.252 | 0.02099 | 470.808 | 9.15E-04 | 603.6805 | 0.00691 |
| 539.86   | 0.00232 | 545.6  | 0.01006 | 563.72 | 0.00477 | 529.416 | 0.02134 | 471.064 | 8.71E-04 | 604.044  | 0.00683 |
| 539.9875 | 0.00232 | 545.75 | 0.00994 | 563.85 | 0.00476 | 529.58  | 0.02171 | 471.32  | 8.29E-04 | 604.4075 | 0.00674 |
| 540.115  | 0.00233 | 545.9  | 0.00982 | 563.98 | 0.00475 | 529.744 | 0.02207 | 471.576 | 7.89E-04 | 604.771  | 0.00665 |
| 540.2425 | 0.00234 | 546.05 | 0.00971 | 564.11 | 0.00474 | 529.908 | 0.02245 | 471.832 | 7.51E-04 | 605.1345 | 0.00655 |
| 540.37   | 0.00234 | 546.2  | 0.00961 | 564.24 | 0.00473 | 530.072 | 0.02282 | 472.088 | 7.15E-04 | 605.498  | 0.00644 |
| 540.4975 | 0.00235 | 546.35 | 0.00951 | 564.37 | 0.00472 | 530.236 | 0.0232  | 472.344 | 6.80E-04 | 605.8615 | 0.00633 |
| 540.625  | 0.00236 | 546.5  | 0.00942 | 564.5  | 0.00471 | 530.4   | 0.02358 | 472.6   | 6.47E-04 | 606.225  | 0.00622 |
| 540.7525 | 0.00237 | 546.65 | 0.00934 | 564.63 | 0.0047  | 530.564 | 0.02397 | 472.856 | 6.15E-04 | 606.5885 | 0.0061  |
| 540.88   | 0.00238 | 546.8  | 0.00927 | 564.76 | 0.00469 | 530.728 | 0.02436 | 473.112 | 5.85E-04 | 606.952  | 0.00598 |
| 541.0075 | 0.00238 | 546.95 | 0.0092  | 564.89 | 0.00467 | 530.892 | 0.02475 | 473.368 | 5.56E-04 | 607.3155 | 0.00586 |
| 541.135  | 0.00239 | 547.1  | 0.00914 | 565.02 | 0.00466 | 531.056 | 0.02515 | 473.624 | 5.28E-04 | 607.679  | 0.00573 |
| 541.2625 | 0.0024  | 547.25 | 0.00908 | 565.15 | 0.00465 | 531.22  | 0.02555 | 473.88  | 5.02E-04 | 608.0425 | 0.0056  |
| 541.39   | 0.00241 | 547.4  | 0.00904 | 565.28 | 0.00463 | 531.384 | 0.02596 | 474.136 | 4.77E-04 | 608.406  | 0.00547 |
| 541.5175 | 0.00242 | 547.55 | 0.009   | 565.41 | 0.00462 | 531.548 | 0.02636 | 474.392 | 4.53E-04 | 608.7695 | 0.00533 |
| 541.645  | 0.00243 | 547.7  | 0.00896 | 565.54 | 0.00461 | 531.712 | 0.02677 | 474.648 | 4.30E-04 | 609.133  | 0.0052  |
| 541.7725 | 0.00244 | 547.85 | 0.00894 | 565.67 | 0.00459 | 531.876 | 0.02719 | 474.904 | 4.08E-04 | 609.4965 | 0.00506 |
| 541.9    | 0.00245 | 548    | 0.00892 | 565.8  | 0.00458 | 532.04  | 0.0276  | 475.16  | 3.87E-04 | 609.86   | 0.00492 |
| 542.0275 | 0.00246 | 548.15 | 0.00891 | 565.93 | 0.00456 | 532.204 | 0.02802 | 475.416 | 3.68E-04 | 610.2235 | 0.00479 |
| 542.155  | 0.00247 | 548.3  | 0.0089  | 566.06 | 0.00455 | 532.368 | 0.02844 | 475.672 | 3.49E-04 | 610.587  | 0.00465 |
| 542.2825 | 0.00248 | 548.45 | 0.00891 | 566.19 | 0.00453 | 532.532 | 0.02886 | 475.928 | 3.31E-04 | 610.9505 | 0.00451 |
| 542.41   | 0.00249 | 548.6  | 0.00892 | 566.32 | 0.00451 | 532.696 | 0.02928 | 476.184 | 3.14E-04 | 611.314  | 0.00437 |
| 542.5375 | 0.0025  | 548.75 | 0.00894 | 566.45 | 0.0045  | 532.86  | 0.02971 | 476.44  | 2.98E-04 | 611.6775 | 0.00424 |
| 542.665  | 0.00251 | 548.9  | 0.00896 | 566.58 | 0.00448 | 533.024 | 0.03014 | 476.696 | 2.83E-04 | 612.041  | 0.0041  |
| 542.7925 | 0.00252 | 549.05 | 0.00899 | 566.71 | 0.00446 | 533.188 | 0.03057 | 476.952 | 2.68E-04 | 612.4045 | 0.00396 |
| 542.92   | 0.00253 | 549.2  | 0.00903 | 566.84 | 0.00444 | 533.352 | 0.031   | 477.208 | 2.55E-04 | 612.768  | 0.00383 |
| 543.0475 | 0.00254 | 549.35 | 0.00908 | 566.97 | 0.00443 | 533.516 | 0.03143 | 477.464 | 2.42E-04 | 613.1315 | 0.0037  |
| 543.175  | 0.00255 | 549.5  | 0.00914 | 567.1  | 0.00441 | 533.68  | 0.03186 | 477.72  | 2.29E-04 | 613.495  | 0.00357 |
| 543.3025 | 0.00256 | 549.65 | 0.0092  | 567.23 | 0.00439 | 533.844 | 0.03229 | 477.976 | 2.18E-04 | 613.8585 | 0.00344 |
| 543.43   | 0.00257 | 549.8  | 0.00927 | 567.36 | 0.00437 | 534.008 | 0.03273 | 478.232 | 2.07E-04 | 614.222  | 0.00332 |
| 543.5575 | 0.00258 | 549.95 | 0.00935 | 567.49 | 0.00435 | 534.172 | 0.03316 | 478.488 | 1.96E-04 | 614.5855 | 0.00319 |
| 543.685  | 0.00259 | 550.1  | 0.00943 | 567.62 | 0.00433 | 534.336 | 0.03359 | 478.744 | 1.87E-04 | 614.949  | 0.00307 |
| 543.8125 | 0.0026  | 550.25 | 0.00952 | 567.75 | 0.00431 | 534.5   | 0.03402 | 479     | 1.77E-04 | 615.3125 | 0.00296 |
| 543.94   | 0.00261 | 550.4  | 0.00962 | 567.88 | 0.00429 | 534.664 | 0.03446 | 479.256 | 1.69E-04 | 615.676  | 0.00284 |
| 544.0675 | 0.00262 | 550.55 | 0.00973 | 568.01 | 0.00427 | 534.828 | 0.03489 | 479.512 | 1.61E-04 | 616.0395 | 0.00273 |
| 544.195  | 0.00264 | 550.7  | 0.00985 | 568.14 | 0.00424 | 534.992 | 0.03532 | 479.768 | 1.53E-04 | 616.403  | 0.00262 |
| 544.3225 | 0.00265 | 550.85 | 0.00997 | 568.27 | 0.00422 | 535.156 | 0.03575 | 480.024 | 1.46E-04 | 616.7665 | 0.00251 |
| 544.45   | 0.00266 | 551    | 0.0101  | 568.4  | 0.0042  | 535.32  | 0.03618 | 480.28  | 1.40E-04 | 617.13   | 0.00241 |
| 544.5775 | 0.00267 | 551.15 | 0.01024 | 568.53 | 0.00418 | 535.484 | 0.0366  | 480.536 | 1.34E-04 | 617.4935 | 0.00231 |
| 544.705  | 0.00268 | 551.3  | 0.01039 | 568.66 | 0.00416 | 535.648 | 0.03703 | 480.792 | 1.29E-04 | 617.857  | 0.00221 |
| 544.8325 | 0.00269 | 551.45 | 0.01055 | 568.79 | 0.00413 | 535.812 | 0.03745 | 481.048 | 1.24E-04 | 618.2205 | 0.00211 |



|          |         |        |         |        |         |         |         |         |          |          |          |
|----------|---------|--------|---------|--------|---------|---------|---------|---------|----------|----------|----------|
| 544.96   | 0.0027  | 551.6  | 0.01071 | 568.92 | 0.00411 | 535.976 | 0.03787 | 481.304 | 1.20E-04 | 618.584  | 0.00202  |
| 545.0875 | 0.00272 | 551.75 | 0.01088 | 569.05 | 0.00409 | 536.14  | 0.03829 | 481.56  | 1.16E-04 | 618.9475 | 0.00193  |
| 545.215  | 0.00273 | 551.9  | 0.01106 | 569.18 | 0.00406 | 536.304 | 0.0387  | 481.816 | 1.13E-04 | 619.311  | 0.00185  |
| 545.3425 | 0.00274 | 552.05 | 0.01125 | 569.31 | 0.00404 | 536.468 | 0.03911 | 482.072 | 1.10E-04 | 619.6745 | 0.00177  |
| 545.47   | 0.00275 | 552.2  | 0.01145 | 569.44 | 0.00401 | 536.632 | 0.03952 | 482.328 | 1.08E-04 | 620.038  | 0.00169  |
| 545.5975 | 0.00276 | 552.35 | 0.01166 | 569.57 | 0.00399 | 536.796 | 0.03993 | 482.584 | 1.06E-04 | 620.4015 | 0.00161  |
| 545.725  | 0.00277 | 552.5  | 0.01187 | 569.7  | 0.00396 | 536.96  | 0.04033 | 482.84  | 1.05E-04 | 620.765  | 0.00153  |
| 545.8525 | 0.00278 | 552.65 | 0.01209 | 569.83 | 0.00394 | 537.124 | 0.04072 | 483.096 | 1.04E-04 | 621.1285 | 0.00146  |
| 545.98   | 0.0028  | 552.8  | 0.01232 | 569.96 | 0.00391 | 537.288 | 0.04111 | 483.352 | 1.05E-04 | 621.492  | 0.00139  |
| 546.1075 | 0.00281 | 552.95 | 0.01256 | 570.09 | 0.00389 | 537.452 | 0.0415  | 483.608 | 1.05E-04 | 621.8555 | 0.00133  |
| 546.235  | 0.00282 | 553.1  | 0.01281 | 570.22 | 0.00386 | 537.616 | 0.04188 | 483.864 | 1.07E-04 | 622.219  | 0.00126  |
| 546.3625 | 0.00283 | 553.25 | 0.01307 | 570.35 | 0.00384 | 537.78  | 0.04226 | 484.12  | 1.09E-04 | 622.5825 | 0.0012   |
| 546.49   | 0.00284 | 553.4  | 0.01333 | 570.48 | 0.00381 | 537.944 | 0.04263 | 484.376 | 1.12E-04 | 622.946  | 0.00114  |
| 546.6175 | 0.00285 | 553.55 | 0.0136  | 570.61 | 0.00378 | 538.108 | 0.04299 | 484.632 | 1.16E-04 | 623.3095 | 0.00109  |
| 546.745  | 0.00286 | 553.7  | 0.01389 | 570.74 | 0.00376 | 538.272 | 0.04335 | 484.888 | 1.20E-04 | 623.673  | 0.00103  |
| 546.8725 | 0.00287 | 553.85 | 0.01418 | 570.87 | 0.00373 | 538.436 | 0.04371 | 485.144 | 1.26E-04 | 624.0365 | 9.80E-04 |
| 547      | 0.00289 | 554    | 0.01448 | 571    | 0.0037  | 538.6   | 0.04405 | 485.4   | 1.32E-04 | 624.4    | 9.30E-04 |
| 547.1275 | 0.0029  | 554.15 | 0.01479 | 571.13 | 0.00368 | 538.764 | 0.04439 | 485.656 | 1.40E-04 | 624.7635 | 8.83E-04 |
| 547.255  | 0.00291 | 554.3  | 0.01511 | 571.26 | 0.00365 | 538.928 | 0.04473 | 485.912 | 1.48E-04 | 625.127  | 8.37E-04 |
| 547.3825 | 0.00292 | 554.45 | 0.01544 | 571.39 | 0.00362 | 539.092 | 0.04505 | 486.168 | 1.58E-04 | 625.4905 | 7.94E-04 |
| 547.51   | 0.00293 | 554.6  | 0.01577 | 571.52 | 0.0036  | 539.256 | 0.04537 | 486.424 | 1.69E-04 | 625.854  | 7.52E-04 |
| 547.6375 | 0.00294 | 554.75 | 0.01612 | 571.65 | 0.00357 | 539.42  | 0.04568 | 486.68  | 1.82E-04 | 626.2175 | 7.12E-04 |
| 547.765  | 0.00295 | 554.9  | 0.01648 | 571.78 | 0.00354 | 539.584 | 0.04598 | 486.936 | 1.96E-04 | 626.581  | 6.74E-04 |
| 547.8925 | 0.00296 | 555.05 | 0.01684 | 571.91 | 0.00351 | 539.748 | 0.04628 | 487.192 | 2.11E-04 | 626.9445 | 6.38E-04 |
| 548.02   | 0.00297 | 555.2  | 0.01721 | 572.04 | 0.00349 | 539.912 | 0.04656 | 487.448 | 2.28E-04 | 627.308  | 6.03E-04 |
| 548.1475 | 0.00298 | 555.35 | 0.0176  | 572.17 | 0.00346 | 540.076 | 0.04684 | 487.704 | 2.47E-04 | 627.6715 | 5.70E-04 |
| 548.275  | 0.00299 | 555.5  | 0.01799 | 572.3  | 0.00343 | 540.24  | 0.04711 | 487.96  | 2.68E-04 | 628.035  | 5.38E-04 |
| 548.4025 | 0.003   | 555.65 | 0.01839 | 572.43 | 0.0034  | 540.404 | 0.04737 | 488.216 | 2.91E-04 | 628.3985 | 5.08E-04 |
| 548.53   | 0.00301 | 555.8  | 0.0188  | 572.56 | 0.00338 | 540.568 | 0.04761 | 488.472 | 3.17E-04 | 628.762  | 4.79E-04 |
| 548.6575 | 0.00302 | 555.95 | 0.01923 | 572.69 | 0.00335 | 540.732 | 0.04786 | 488.728 | 3.45E-04 | 629.1255 | 4.51E-04 |
| 548.785  | 0.00303 | 556.1  | 0.01966 | 572.82 | 0.00332 | 540.896 | 0.04809 | 488.984 | 3.75E-04 | 629.489  | 4.25E-04 |
| 548.9125 | 0.00304 | 556.25 | 0.0201  | 572.95 | 0.00329 | 541.06  | 0.04831 | 489.24  | 4.09E-04 | 629.8525 | 4.00E-04 |
| 549.04   | 0.00305 | 556.4  | 0.02055 | 573.08 | 0.00327 | 541.224 | 0.04852 | 489.496 | 4.45E-04 | 630.216  | 3.77E-04 |
| 549.1675 | 0.00305 | 556.55 | 0.02101 | 573.21 | 0.00324 | 541.388 | 0.04872 | 489.752 | 4.85E-04 | 630.5795 | 3.54E-04 |
| 549.295  | 0.00306 | 556.7  | 0.02148 | 573.34 | 0.00321 | 541.552 | 0.04891 | 490.008 | 5.29E-04 | 630.943  | 3.33E-04 |
| 549.4225 | 0.00307 | 556.85 | 0.02196 | 573.47 | 0.00318 | 541.716 | 0.04909 | 490.264 | 5.76E-04 | 631.3065 | 3.13E-04 |
| 549.55   | 0.00308 | 557    | 0.02245 | 573.6  | 0.00316 | 541.88  | 0.04926 | 490.52  | 6.28E-04 | 631.67   | 2.93E-04 |
| 549.6775 | 0.00309 | 557.15 | 0.02295 | 573.73 | 0.00313 | 542.044 | 0.04942 | 490.776 | 6.83E-04 | 632.0335 | 2.75E-04 |
| 549.805  | 0.00309 | 557.3  | 0.02346 | 573.86 | 0.0031  | 542.208 | 0.04956 | 491.032 | 7.44E-04 | 632.397  | 2.58E-04 |
| 549.9325 | 0.0031  | 557.45 | 0.02397 | 573.99 | 0.00308 | 542.372 | 0.0497  | 491.288 | 8.10E-04 | 632.7605 | 2.41E-04 |
| 550.06   | 0.00311 | 557.6  | 0.0245  | 574.12 | 0.00305 | 542.536 | 0.04983 | 491.544 | 8.81E-04 | 633.124  | 2.26E-04 |
| 550.1875 | 0.00312 | 557.75 | 0.02504 | 574.25 | 0.00302 | 542.7   | 0.04994 | 491.8   | 9.58E-04 | 633.4875 | 2.11E-04 |
| 550.315  | 0.00312 | 557.9  | 0.02559 | 574.38 | 0.003   | 542.864 | 0.05004 | 492.056 | 0.00104  | 633.851  | 1.97E-04 |
| 550.4425 | 0.00313 | 558.05 | 0.02615 | 574.51 | 0.00297 | 543.028 | 0.05013 | 492.312 | 0.00113  | 634.2145 | 1.84E-04 |
| 550.57   | 0.00313 | 558.2  | 0.02672 | 574.64 | 0.00294 | 543.192 | 0.05021 | 492.568 | 0.00123  | 634.578  | 1.71E-04 |
| 550.6975 | 0.00314 | 558.35 | 0.0273  | 574.77 | 0.00292 | 543.356 | 0.05028 | 492.824 | 0.00133  | 634.9415 | 1.60E-04 |
| 550.825  | 0.00315 | 558.5  | 0.02788 | 574.9  | 0.00289 | 543.52  | 0.05034 | 493.08  | 0.00145  | 635.305  | 1.49E-04 |
| 550.9525 | 0.00315 | 558.65 | 0.02848 | 575.03 | 0.00287 | 543.684 | 0.05038 | 493.336 | 0.00157  | 635.6685 | 1.38E-04 |
| 551.08   | 0.00316 | 558.8  | 0.02909 | 575.16 | 0.00284 | 543.848 | 0.05042 | 493.592 | 0.0017   | 636.032  | 1.28E-04 |
| 551.2075 | 0.00316 | 558.95 | 0.02971 | 575.29 | 0.00282 | 544.012 | 0.05044 | 493.848 | 0.00184  | 636.3955 | 1.19E-04 |
| 551.335  | 0.00317 | 559.1  | 0.03034 | 575.42 | 0.00279 | 544.176 | 0.05045 | 494.104 | 0.00199  | 636.759  | 1.10E-04 |

|          |         |        |         |        |         |         |         |         |         |          |          |
|----------|---------|--------|---------|--------|---------|---------|---------|---------|---------|----------|----------|
| 551.4625 | 0.00317 | 559.25 | 0.03097 | 575.55 | 0.00277 | 544.34  | 0.05045 | 494.36  | 0.00215 | 637.1225 | 1.02E-04 |
| 551.59   | 0.00317 | 559.4  | 0.03162 | 575.68 | 0.00274 | 544.504 | 0.05043 | 494.616 | 0.00233 | 637.486  | 9.47E-05 |
| 551.7175 | 0.00318 | 559.55 | 0.03228 | 575.81 | 0.00272 | 544.668 | 0.05041 | 494.872 | 0.00251 | 637.8495 | 8.76E-05 |
| 551.845  | 0.00318 | 559.7  | 0.03295 | 575.94 | 0.00269 | 544.832 | 0.05037 | 495.128 | 0.00271 | 638.213  | 8.09E-05 |
| 551.9725 | 0.00318 | 559.85 | 0.03362 | 576.07 | 0.00267 | 544.996 | 0.05032 | 495.384 | 0.00293 | 638.5765 | 7.46E-05 |
| 552.1    | 0.00319 | 560    | 0.03431 | 576.2  | 0.00265 | 545.16  | 0.05026 | 495.64  | 0.00316 | 638.94   | 6.88E-05 |
| 552.2275 | 0.00319 | 560.15 | 0.03501 | 576.33 | 0.00263 | 545.324 | 0.05018 | 495.896 | 0.0034  | 639.3035 | 6.34E-05 |
| 552.355  | 0.00319 | 560.3  | 0.03571 | 576.46 | 0.0026  | 545.488 | 0.0501  | 496.152 | 0.00366 | 639.667  | 5.83E-05 |
| 552.4825 | 0.00319 | 560.45 | 0.03643 | 576.59 | 0.00258 | 545.652 | 0.05    | 496.408 | 0.00394 | 640.0305 | 5.36E-05 |
| 552.61   | 0.00319 | 560.6  | 0.03716 | 576.72 | 0.00256 | 545.816 | 0.0499  | 496.664 | 0.00424 | 640.394  | 4.92E-05 |
| 552.7375 | 0.00319 | 560.75 | 0.03789 | 576.85 | 0.00254 | 545.98  | 0.04978 | 496.92  | 0.00456 | 640.7575 | 4.51E-05 |
| 552.865  | 0.00319 | 560.9  | 0.03863 | 576.98 | 0.00252 | 546.144 | 0.04965 | 497.176 | 0.00489 | 641.121  | 4.13E-05 |
| 552.9925 | 0.00319 | 561.05 | 0.03939 | 577.11 | 0.0025  | 546.308 | 0.0495  | 497.432 | 0.00525 | 641.4845 | 3.78E-05 |
| 553.12   | 0.00319 | 561.2  | 0.04015 | 577.24 | 0.00248 | 546.472 | 0.04935 | 497.688 | 0.00563 | 641.848  | 3.46E-05 |
| 553.2475 | 0.00319 | 561.35 | 0.04092 | 577.37 | 0.00246 | 546.636 | 0.04919 | 497.944 | 0.00604 | 642.2115 | 3.16E-05 |
| 553.375  | 0.00319 | 561.5  | 0.0417  | 577.5  | 0.00244 | 546.8   | 0.04901 | 498.2   | 0.00647 | 642.575  | 2.88E-05 |
| 553.5025 | 0.00319 | 561.65 | 0.04249 | 577.63 | 0.00242 | 546.964 | 0.04883 | 498.456 | 0.00693 | 642.9385 | 2.62E-05 |
| 553.63   | 0.00319 | 561.8  | 0.04329 | 577.76 | 0.0024  | 547.128 | 0.04863 | 498.712 | 0.00741 | 643.302  | 2.39E-05 |
| 553.7575 | 0.00319 | 561.95 | 0.0441  | 577.89 | 0.00238 | 547.292 | 0.04842 | 498.968 | 0.00792 | 643.6655 | 2.17E-05 |
| 553.885  | 0.00318 | 562.1  | 0.04492 | 578.02 | 0.00236 | 547.456 | 0.04821 | 499.224 | 0.00847 | 644.029  | 1.97E-05 |
| 554.0125 | 0.00318 | 562.25 | 0.04574 | 578.15 | 0.00235 | 547.62  | 0.04798 | 499.48  | 0.00904 | 644.3925 | 1.79E-05 |
| 554.14   | 0.00318 | 562.4  | 0.04658 | 578.28 | 0.00233 | 547.784 | 0.04774 | 499.736 | 0.00965 | 644.756  | 1.62E-05 |
| 554.2675 | 0.00318 | 562.55 | 0.04742 | 578.41 | 0.00231 | 547.948 | 0.04749 | 499.992 | 0.01029 | 645.1195 | 1.47E-05 |
| 554.395  | 0.00317 | 562.7  | 0.04827 | 578.54 | 0.0023  | 548.112 | 0.04724 | 500.248 | 0.01097 | 645.483  | 1.32E-05 |
| 554.5225 | 0.00317 | 562.85 | 0.04912 | 578.67 | 0.00228 | 548.276 | 0.04697 | 500.504 | 0.01168 | 645.8465 | 1.20E-05 |
| 554.65   | 0.00316 | 563    | 0.04999 | 578.8  | 0.00226 | 548.44  | 0.04669 | 500.76  | 0.01244 | 646.21   | 1.08E-05 |
| 554.7775 | 0.00316 | 563.15 | 0.05086 | 578.93 | 0.00225 | 548.604 | 0.04641 | 501.016 | 0.01323 | 646.5735 | 9.73E-06 |
| 554.905  | 0.00315 | 563.3  | 0.05175 | 579.06 | 0.00224 | 548.768 | 0.04611 | 501.272 | 0.01406 | 646.937  | 8.75E-06 |
| 555.0325 | 0.00315 | 563.45 | 0.05263 | 579.19 | 0.00222 | 548.932 | 0.04581 | 501.528 | 0.01494 | 647.3005 | 7.87E-06 |
| 555.16   | 0.00314 | 563.6  | 0.05353 | 579.32 | 0.00221 | 549.096 | 0.0455  | 501.784 | 0.01586 | 647.664  | 7.07E-06 |
| 555.2875 | 0.00313 | 563.75 | 0.05443 | 579.45 | 0.0022  | 549.26  | 0.04518 | 502.04  | 0.01683 | 648.0275 | 6.35E-06 |
| 555.415  | 0.00313 | 563.9  | 0.05534 | 579.58 | 0.00218 | 549.424 | 0.04485 | 502.296 | 0.01784 | 648.391  | 5.70E-06 |
| 555.5425 | 0.00312 | 564.05 | 0.05626 | 579.71 | 0.00217 | 549.588 | 0.04452 | 502.552 | 0.0189  | 648.7545 | 5.11E-06 |
| 555.67   | 0.00311 | 564.2  | 0.05718 | 579.84 | 0.00216 | 549.752 | 0.04417 | 502.808 | 0.02002 | 649.118  | 4.58E-06 |
| 555.7975 | 0.0031  | 564.35 | 0.05811 | 579.97 | 0.00215 | 549.916 | 0.04382 | 503.064 | 0.02118 | 649.4815 | 4.10E-06 |
| 555.925  | 0.0031  | 564.5  | 0.05905 | 580.1  | 0.00214 | 550.08  | 0.04347 | 503.32  | 0.0224  | 649.845  | 3.67E-06 |
| 556.0525 | 0.00309 | 564.65 | 0.05999 | 580.23 | 0.00213 | 550.244 | 0.0431  | 503.576 | 0.02368 | 650.2085 | 3.29E-06 |
| 556.18   | 0.00308 | 564.8  | 0.06093 | 580.36 | 0.00212 | 550.408 | 0.04273 | 503.832 | 0.02501 | 650.572  | 2.95E-06 |
| 556.3075 | 0.00307 | 564.95 | 0.06189 | 580.49 | 0.00211 | 550.572 | 0.04235 | 504.088 | 0.02639 | 650.9355 | 2.65E-06 |
| 556.435  | 0.00306 | 565.1  | 0.06284 | 580.62 | 0.0021  | 550.736 | 0.04197 | 504.344 | 0.02784 | 651.299  | 2.38E-06 |
| 556.5625 | 0.00305 | 565.25 | 0.06381 | 580.75 | 0.00209 | 550.9   | 0.04158 | 504.6   | 0.02935 | 651.6625 | 2.14E-06 |
| 556.69   | 0.00304 | 565.4  | 0.06477 | 580.88 | 0.00209 | 551.064 | 0.04119 | 504.856 | 0.03091 | 652.026  | 1.94E-06 |
| 556.8175 | 0.00303 | 565.55 | 0.06575 | 581.01 | 0.00208 | 551.228 | 0.04079 | 505.112 | 0.03254 | 652.3895 | 1.76E-06 |
| 556.945  | 0.00302 | 565.7  | 0.06672 | 581.14 | 0.00207 | 551.392 | 0.04038 | 505.368 | 0.03424 | 652.753  | 1.61E-06 |
| 557.0725 | 0.00301 | 565.85 | 0.0677  | 581.27 | 0.00207 | 551.556 | 0.03997 | 505.624 | 0.036   | 653.1165 | 1.48E-06 |
| 557.2    | 0.00299 | 566    | 0.06869 | 581.4  | 0.00206 | 551.72  | 0.03956 | 505.88  | 0.03782 | 653.48   | 1.37E-06 |
| 557.3275 | 0.00298 | 566.15 | 0.06967 | 581.53 | 0.00206 | 551.884 | 0.03914 | 506.136 | 0.03972 | 653.8435 | 1.28E-06 |
| 557.455  | 0.00297 | 566.3  | 0.07066 | 581.66 | 0.00205 | 552.048 | 0.03872 | 506.392 | 0.04167 | 654.207  | 1.22E-06 |
| 557.5825 | 0.00296 | 566.45 | 0.07166 | 581.79 | 0.00205 | 552.212 | 0.03829 | 506.648 | 0.0437  | 654.5705 | 1.17E-06 |
| 557.71   | 0.00294 | 566.6  | 0.07265 | 581.92 | 0.00205 | 552.376 | 0.03786 | 506.904 | 0.0458  | 654.934  | 1.14E-06 |
| 557.8375 | 0.00293 | 566.75 | 0.07365 | 582.05 | 0.00204 | 552.54  | 0.03743 | 507.16  | 0.04796 | 655.2975 | 1.12E-06 |

|          |         |        |         |        |         |         |         |         |         |          |          |
|----------|---------|--------|---------|--------|---------|---------|---------|---------|---------|----------|----------|
| 557.965  | 0.00292 | 566.9  | 0.07465 | 582.18 | 0.00204 | 552.704 | 0.03699 | 507.416 | 0.0502  | 655.661  | 1.12E-06 |
| 558.0925 | 0.0029  | 567.05 | 0.07565 | 582.31 | 0.00204 | 552.868 | 0.03656 | 507.672 | 0.05251 | 656.0245 | 1.14E-06 |
| 558.22   | 0.00289 | 567.2  | 0.07666 | 582.44 | 0.00204 | 553.032 | 0.03612 | 507.928 | 0.05488 | 656.388  | 1.18E-06 |
| 558.3475 | 0.00287 | 567.35 | 0.07766 | 582.57 | 0.00204 | 553.196 | 0.03567 | 508.184 | 0.05733 | 656.7515 | 1.23E-06 |
| 558.475  | 0.00286 | 567.5  | 0.07867 | 582.7  | 0.00204 | 553.36  | 0.03523 | 508.44  | 0.05985 | 657.115  | 1.29E-06 |
| 558.6025 | 0.00284 | 567.65 | 0.07967 | 582.83 | 0.00204 | 553.524 | 0.03478 | 508.696 | 0.06243 | 657.4785 | 1.37E-06 |
| 558.73   | 0.00283 | 567.8  | 0.08068 | 582.96 | 0.00204 | 553.688 | 0.03433 | 508.952 | 0.06509 | 657.842  | 1.47E-06 |
| 558.8575 | 0.00281 | 567.95 | 0.08168 | 583.09 | 0.00204 | 553.852 | 0.03388 | 509.208 | 0.06782 | 658.2055 | 1.59E-06 |
| 558.985  | 0.00279 | 568.1  | 0.08269 | 583.22 | 0.00204 | 554.016 | 0.03344 | 509.464 | 0.07061 | 658.569  | 1.72E-06 |
| 559.1125 | 0.00278 | 568.25 | 0.08369 | 583.35 | 0.00205 | 554.18  | 0.03298 | 509.72  | 0.07347 | 658.9325 | 1.88E-06 |
| 559.24   | 0.00276 | 568.4  | 0.08469 | 583.48 | 0.00205 | 554.344 | 0.03253 | 509.976 | 0.0764  | 659.296  | 2.05E-06 |
| 559.3675 | 0.00274 | 568.55 | 0.0857  | 583.61 | 0.00205 | 554.508 | 0.03208 | 510.232 | 0.07939 | 659.6595 | 2.25E-06 |
| 559.495  | 0.00273 | 568.7  | 0.08669 | 583.74 | 0.00206 | 554.672 | 0.03163 | 510.488 | 0.08245 | 660.023  | 2.46E-06 |
| 559.6225 | 0.00271 | 568.85 | 0.08769 | 583.87 | 0.00206 | 554.836 | 0.03118 | 510.744 | 0.08557 | 660.3865 | 2.70E-06 |
| 559.75   | 0.00269 | 569    | 0.08869 | 584    | 0.00207 | 555     | 0.03073 | 511     | 0.08875 | 660.75   | 2.96E-06 |
| 559.8775 | 0.00267 | 569.15 | 0.08968 | 584.13 | 0.00207 | 555.164 | 0.03028 | 511.256 | 0.09198 | 661.1135 | 3.25E-06 |
| 560.005  | 0.00265 | 569.3  | 0.09066 | 584.26 | 0.00208 | 555.328 | 0.02983 | 511.512 | 0.09528 | 661.477  | 3.57E-06 |
| 560.1325 | 0.00264 | 569.45 | 0.09165 | 584.39 | 0.00208 | 555.492 | 0.02939 | 511.768 | 0.09862 | 661.8405 | 3.92E-06 |
| 560.26   | 0.00262 | 569.6  | 0.09263 | 584.52 | 0.00209 | 555.656 | 0.02894 | 512.024 | 0.10202 | 662.204  | 4.30E-06 |
| 560.3875 | 0.0026  | 569.75 | 0.0936  | 584.65 | 0.0021  | 555.82  | 0.0285  | 512.28  | 0.10547 | 662.5675 | 4.71E-06 |
| 560.515  | 0.00258 | 569.9  | 0.09458 | 584.78 | 0.0021  | 555.984 | 0.02805 | 512.536 | 0.10897 | 662.931  | 5.15E-06 |
| 560.6425 | 0.00256 | 570.05 | 0.09554 | 584.91 | 0.00211 | 556.148 | 0.02761 | 512.792 | 0.1125  | 663.2945 | 5.64E-06 |
| 560.77   | 0.00254 | 570.2  | 0.0965  | 585.04 | 0.00212 | 556.312 | 0.02718 | 513.048 | 0.11608 | 663.658  | 6.16E-06 |
| 560.8975 | 0.00252 | 570.35 | 0.09746 | 585.17 | 0.00213 | 556.476 | 0.02674 | 513.304 | 0.11969 | 664.0215 | 6.73E-06 |
| 561.025  | 0.0025  | 570.5  | 0.0984  | 585.3  | 0.00214 | 556.64  | 0.02631 | 513.56  | 0.12333 | 664.385  | 7.34E-06 |
| 561.1525 | 0.00248 | 570.65 | 0.09935 | 585.43 | 0.00215 | 556.804 | 0.02588 | 513.816 | 0.127   | 664.7485 | 7.99E-06 |
| 561.28   | 0.00246 | 570.8  | 0.10028 | 585.56 | 0.00216 | 556.968 | 0.02545 | 514.072 | 0.1307  | 665.112  | 8.70E-06 |
| 561.4075 | 0.00244 | 570.95 | 0.10121 | 585.69 | 0.00217 | 557.132 | 0.02502 | 514.328 | 0.13442 | 665.4755 | 9.45E-06 |
| 561.535  | 0.00242 | 571.1  | 0.10213 | 585.82 | 0.00218 | 557.296 | 0.0246  | 514.584 | 0.13815 | 665.839  | 1.03E-05 |
| 561.6625 | 0.0024  | 571.25 | 0.10304 | 585.95 | 0.00219 | 557.46  | 0.02418 | 514.84  | 0.1419  | 666.2025 | 1.11E-05 |
| 561.79   | 0.00238 | 571.4  | 0.10394 | 586.08 | 0.0022  | 557.624 | 0.02377 | 515.096 | 0.14565 | 666.566  | 1.21E-05 |
| 561.9175 | 0.00236 | 571.55 | 0.10483 | 586.21 | 0.00222 | 557.788 | 0.02336 | 515.352 | 0.1494  | 666.9295 | 1.31E-05 |
| 562.045  | 0.00233 | 571.7  | 0.10572 | 586.34 | 0.00223 | 557.952 | 0.02295 | 515.608 | 0.15315 | 667.293  | 1.41E-05 |
| 562.1725 | 0.00231 | 571.85 | 0.10659 | 586.47 | 0.00224 | 558.116 | 0.02254 | 515.864 | 0.1569  | 667.6565 | 1.52E-05 |
| 562.3    | 0.00229 | 572    | 0.10746 | 586.6  | 0.00225 | 558.28  | 0.02214 | 516.12  | 0.16063 | 668.02   | 1.64E-05 |
| 562.4275 | 0.00227 | 572.15 | 0.10831 | 586.73 | 0.00227 | 558.444 | 0.02175 | 516.376 | 0.16434 | 668.3835 | 1.77E-05 |
| 562.555  | 0.00225 | 572.3  | 0.10916 | 586.86 | 0.00228 | 558.608 | 0.02136 | 516.632 | 0.16803 | 668.747  | 1.91E-05 |
| 562.6825 | 0.00223 | 572.45 | 0.10999 | 586.99 | 0.0023  | 558.772 | 0.02097 | 516.888 | 0.17169 | 669.1105 | 2.05E-05 |
| 562.81   | 0.0022  | 572.6  | 0.11081 | 587.12 | 0.00231 | 558.936 | 0.02059 | 517.144 | 0.17532 | 669.474  | 2.20E-05 |
| 562.9375 | 0.00218 | 572.75 | 0.11162 | 587.25 | 0.00233 | 559.1   | 0.02021 | 517.4   | 0.1789  | 669.8375 | 2.36E-05 |
| 563.065  | 0.00216 | 572.9  | 0.11242 | 587.38 | 0.00234 | 559.264 | 0.01983 | 517.656 | 0.18245 | 670.201  | 2.53E-05 |
| 563.1925 | 0.00214 | 573.05 | 0.11321 | 587.51 | 0.00236 | 559.428 | 0.01947 | 517.912 | 0.18594 | 670.5645 | 2.71E-05 |
| 563.32   | 0.00212 | 573.2  | 0.11398 | 587.64 | 0.00237 | 559.592 | 0.0191  | 518.168 | 0.18937 | 670.928  | 2.89E-05 |
| 563.4475 | 0.00209 | 573.35 | 0.11474 | 587.77 | 0.00239 | 559.756 | 0.01874 | 518.424 | 0.19275 | 671.2915 | 3.09E-05 |
| 563.575  | 0.00207 | 573.5  | 0.11549 | 587.9  | 0.0024  | 559.92  | 0.01839 | 518.68  | 0.19605 | 671.655  | 3.30E-05 |
| 563.7025 | 0.00205 | 573.65 | 0.11622 | 588.03 | 0.00242 | 560.084 | 0.01804 | 518.936 | 0.19929 | 672.0185 | 3.51E-05 |
| 563.83   | 0.00203 | 573.8  | 0.11694 | 588.16 | 0.00244 | 560.248 | 0.01769 | 519.192 | 0.20244 | 672.382  | 3.74E-05 |
| 563.9575 | 0.00201 | 573.95 | 0.11764 | 588.29 | 0.00245 | 560.412 | 0.01735 | 519.448 | 0.20552 | 672.7455 | 3.98E-05 |
| 564.085  | 0.00198 | 574.1  | 0.11833 | 588.42 | 0.00247 | 560.576 | 0.01702 | 519.704 | 0.2085  | 673.109  | 4.23E-05 |
| 564.2125 | 0.00196 | 574.25 | 0.11901 | 588.55 | 0.00249 | 560.74  | 0.01669 | 519.96  | 0.21139 | 673.4725 | 4.48E-05 |
| 564.34   | 0.00194 | 574.4  | 0.11967 | 588.68 | 0.00251 | 560.904 | 0.01636 | 520.216 | 0.21418 | 673.836  | 4.75E-05 |

|          |          |        |         |        |         |         |         |         |         |          |          |
|----------|----------|--------|---------|--------|---------|---------|---------|---------|---------|----------|----------|
| 564.4675 | 0.00192  | 574.55 | 0.12032 | 588.81 | 0.00252 | 561.068 | 0.01605 | 520.472 | 0.21687 | 674.1995 | 5.03E-05 |
| 564.595  | 0.00189  | 574.7  | 0.12095 | 588.94 | 0.00254 | 561.232 | 0.01573 | 520.728 | 0.21944 | 674.563  | 5.33E-05 |
| 564.7225 | 0.00187  | 574.85 | 0.12156 | 589.07 | 0.00256 | 561.396 | 0.01542 | 520.984 | 0.22191 | 674.9265 | 5.63E-05 |
| 564.85   | 0.00185  | 575    | 0.12216 | 589.2  | 0.00258 | 561.56  | 0.01512 | 521.24  | 0.22426 | 675.29   | 5.94E-05 |
| 564.9775 | 0.00183  | 575.15 | 0.12274 | 589.33 | 0.0026  | 561.724 | 0.01482 | 521.496 | 0.22648 | 675.6535 | 6.27E-05 |
| 565.105  | 0.00181  | 575.3  | 0.1233  | 589.46 | 0.00261 | 561.888 | 0.01453 | 521.752 | 0.22858 | 676.017  | 6.60E-05 |
| 565.2325 | 0.00178  | 575.45 | 0.12385 | 589.59 | 0.00263 | 562.052 | 0.01424 | 522.008 | 0.23055 | 676.3805 | 6.95E-05 |
| 565.36   | 0.00176  | 575.6  | 0.12438 | 589.72 | 0.00265 | 562.216 | 0.01396 | 522.264 | 0.23238 | 676.744  | 7.31E-05 |
| 565.4875 | 0.00174  | 575.75 | 0.1249  | 589.85 | 0.00267 | 562.38  | 0.01368 | 522.52  | 0.23408 | 677.1075 | 7.68E-05 |
| 565.615  | 0.00172  | 575.9  | 0.12539 | 589.98 | 0.00269 | 562.544 | 0.01341 | 522.776 | 0.23563 | 677.471  | 8.06E-05 |
| 565.7425 | 0.0017   | 576.05 | 0.12587 | 590.11 | 0.00271 | 562.708 | 0.01315 | 523.032 | 0.23704 | 677.8345 | 8.46E-05 |
| 565.87   | 0.00167  | 576.2  | 0.12633 | 590.24 | 0.00273 | 562.872 | 0.01289 | 523.288 | 0.23831 | 678.198  | 8.86E-05 |
| 565.9975 | 0.00165  | 576.35 | 0.12677 | 590.37 | 0.00275 | 563.036 | 0.01263 | 523.544 | 0.23943 | 678.5615 | 9.27E-05 |
| 566.125  | 0.00163  | 576.5  | 0.1272  | 590.5  | 0.00277 | 563.2   | 0.01238 | 523.8   | 0.24039 | 678.925  | 9.70E-05 |
| 566.2525 | 0.00161  | 576.65 | 0.12761 | 590.63 | 0.00279 | 563.364 | 0.01214 | 524.056 | 0.24121 | 679.2885 | 1.01E-04 |
| 566.38   | 0.00159  | 576.8  | 0.12799 | 590.76 | 0.0028  | 563.528 | 0.0119  | 524.312 | 0.24187 | 679.652  | 1.06E-04 |
| 566.5075 | 0.00157  | 576.95 | 0.12836 | 590.89 | 0.00282 | 563.692 | 0.01167 | 524.568 | 0.24237 | 680.0155 | 1.10E-04 |
| 566.635  | 0.00155  | 577.1  | 0.12872 | 591.02 | 0.00284 | 563.856 | 0.01144 | 524.824 | 0.24272 | 680.379  | 1.15E-04 |
| 566.7625 | 0.00153  | 577.25 | 0.12905 | 591.15 | 0.00286 | 564.02  | 0.01121 | 525.08  | 0.24291 | 680.7425 | 1.20E-04 |
| 566.89   | 0.0015   | 577.4  | 0.12936 | 591.28 | 0.00288 | 564.184 | 0.01099 | 525.336 | 0.24294 | 681.106  | 1.24E-04 |
| 567.0175 | 0.00148  | 577.55 | 0.12966 | 591.41 | 0.0029  | 564.348 | 0.01078 | 525.592 | 0.24281 | 681.4695 | 1.29E-04 |
| 567.145  | 0.00146  | 577.7  | 0.12993 | 591.54 | 0.00292 | 564.512 | 0.01057 | 525.848 | 0.24253 | 681.833  | 1.34E-04 |
| 567.2725 | 0.00144  | 577.85 | 0.13019 | 591.67 | 0.00294 | 564.676 | 0.01037 | 526.104 | 0.24209 | 682.1965 | 1.39E-04 |
| 567.4    | 0.00142  | 578    | 0.13043 | 591.8  | 0.00296 | 564.84  | 0.01017 | 526.36  | 0.24149 | 682.56   | 1.44E-04 |
| 567.5275 | 0.0014   | 578.15 | 0.13064 | 591.93 | 0.00298 | 565.004 | 0.00998 | 526.616 | 0.24074 | 682.9235 | 1.50E-04 |
| 567.655  | 0.00138  | 578.3  | 0.13084 | 592.06 | 0.003   | 565.168 | 0.00979 | 526.872 | 0.23984 | 683.287  | 1.55E-04 |
| 567.7825 | 0.00136  | 578.45 | 0.13102 | 592.19 | 0.00302 | 565.332 | 0.00961 | 527.128 | 0.23878 | 683.6505 | 1.60E-04 |
| 567.91   | 0.00134  | 578.6  | 0.13118 | 592.32 | 0.00304 | 565.496 | 0.00943 | 527.384 | 0.23758 | 684.014  | 1.65E-04 |
| 568.0375 | 0.00132  | 578.75 | 0.13133 | 592.45 | 0.00305 | 565.66  | 0.00926 | 527.64  | 0.23623 | 684.3775 | 1.71E-04 |
| 568.165  | 0.0013   | 578.9  | 0.13145 | 592.58 | 0.00307 | 565.824 | 0.00909 | 527.896 | 0.23473 | 684.741  | 1.76E-04 |
| 568.2925 | 0.00129  | 579.05 | 0.13155 | 592.71 | 0.00309 | 565.988 | 0.00893 | 528.152 | 0.23309 | 685.1045 | 1.82E-04 |
| 568.42   | 0.00127  | 579.2  | 0.13164 | 592.84 | 0.00311 | 566.152 | 0.00877 | 528.408 | 0.23131 | 685.468  | 1.87E-04 |
| 568.5475 | 0.00125  | 579.35 | 0.1317  | 592.97 | 0.00313 | 566.316 | 0.00862 | 528.664 | 0.2294  | 685.8315 | 1.93E-04 |
| 568.675  | 0.00123  | 579.5  | 0.13175 | 593.1  | 0.00315 | 566.48  | 0.00847 | 528.92  | 0.22735 | 686.195  | 1.98E-04 |
| 568.8025 | 0.00121  | 579.65 | 0.13178 | 593.23 | 0.00316 | 566.644 | 0.00832 | 529.176 | 0.22518 | 686.5585 | 2.04E-04 |
| 568.93   | 0.00119  | 579.8  | 0.13179 | 593.36 | 0.00318 | 566.808 | 0.00818 | 529.432 | 0.22288 | 686.922  | 2.10E-04 |
| 569.0575 | 0.00117  | 579.95 | 0.13178 | 593.49 | 0.0032  | 566.972 | 0.00805 | 529.688 | 0.22046 | 687.2855 | 2.15E-04 |
| 569.185  | 0.00116  | 580.1  | 0.13175 | 593.62 | 0.00322 | 567.136 | 0.00791 | 529.944 | 0.21793 | 687.649  | 2.21E-04 |
| 569.3125 | 0.00114  | 580.25 | 0.1317  | 593.75 | 0.00323 | 567.3   | 0.00779 | 530.2   | 0.21529 | 688.0125 | 2.26E-04 |
| 569.44   | 0.00112  | 580.4  | 0.13164 | 593.88 | 0.00325 | 567.464 | 0.00767 | 530.456 | 0.21254 | 688.376  | 2.32E-04 |
| 569.5675 | 0.0011   | 580.55 | 0.13155 | 594.01 | 0.00327 | 567.628 | 0.00755 | 530.712 | 0.20969 | 688.7395 | 2.38E-04 |
| 569.695  | 0.00109  | 580.7  | 0.13145 | 594.14 | 0.00328 | 567.792 | 0.00743 | 530.968 | 0.20674 | 689.103  | 2.43E-04 |
| 569.8225 | 0.00107  | 580.85 | 0.13133 | 594.27 | 0.0033  | 567.956 | 0.00733 | 531.224 | 0.2037  | 689.4665 | 2.49E-04 |
| 569.95   | 0.00105  | 581    | 0.1312  | 594.4  | 0.00331 | 568.12  | 0.00722 | 531.48  | 0.20058 | 689.83   | 2.55E-04 |
| 570.0775 | 0.00104  | 581.15 | 0.13104 | 594.53 | 0.00333 | 568.284 | 0.00712 | 531.736 | 0.19738 | 690.1935 | 2.60E-04 |
| 570.205  | 0.00102  | 581.3  | 0.13087 | 594.66 | 0.00335 | 568.448 | 0.00702 | 531.992 | 0.1941  | 690.557  | 2.66E-04 |
| 570.3325 | 0.00101  | 581.45 | 0.13069 | 594.79 | 0.00336 | 568.612 | 0.00693 | 532.248 | 0.19075 | 690.9205 | 2.71E-04 |
| 570.46   | 9.90E-04 | 581.6  | 0.13048 | 594.92 | 0.00338 | 568.776 | 0.00684 | 532.504 | 0.18734 | 691.284  | 2.77E-04 |
| 570.5875 | 9.74E-04 | 581.75 | 0.13026 | 595.05 | 0.00339 | 568.94  | 0.00676 | 532.76  | 0.18387 | 691.6475 | 2.82E-04 |
| 570.715  | 9.59E-04 | 581.9  | 0.13002 | 595.18 | 0.0034  | 569.104 | 0.00668 | 533.016 | 0.18034 | 692.011  | 2.88E-04 |
| 570.8425 | 9.44E-04 | 582.05 | 0.12977 | 595.31 | 0.00342 | 569.268 | 0.0066  | 533.272 | 0.17677 | 692.3745 | 2.93E-04 |

|          |          |        |         |        |         |         |         |         |         |          |          |
|----------|----------|--------|---------|--------|---------|---------|---------|---------|---------|----------|----------|
| 570.97   | 9.29E-04 | 582.2  | 0.1295  | 595.44 | 0.00343 | 569.432 | 0.00653 | 533.528 | 0.17316 | 692.738  | 2.99E-04 |
| 571.0975 | 9.14E-04 | 582.35 | 0.12921 | 595.57 | 0.00344 | 569.596 | 0.00646 | 533.784 | 0.16951 | 693.1015 | 3.04E-04 |
| 571.225  | 9.00E-04 | 582.5  | 0.12891 | 595.7  | 0.00346 | 569.76  | 0.0064  | 534.04  | 0.16583 | 693.465  | 3.10E-04 |
| 571.3525 | 8.86E-04 | 582.65 | 0.1286  | 595.83 | 0.00347 | 569.924 | 0.00633 | 534.296 | 0.16213 | 693.8285 | 3.15E-04 |
| 571.48   | 8.72E-04 | 582.8  | 0.12827 | 595.96 | 0.00348 | 570.088 | 0.00628 | 534.552 | 0.1584  | 694.192  | 3.20E-04 |
| 571.6075 | 8.58E-04 | 582.95 | 0.12792 | 596.09 | 0.00349 | 570.252 | 0.00622 | 534.808 | 0.15466 | 694.5555 | 3.26E-04 |
| 571.735  | 8.45E-04 | 583.1  | 0.12756 | 596.22 | 0.0035  | 570.416 | 0.00617 | 535.064 | 0.15091 | 694.919  | 3.31E-04 |
| 571.8625 | 8.32E-04 | 583.25 | 0.12719 | 596.35 | 0.00352 | 570.58  | 0.00613 | 535.32  | 0.14716 | 695.2825 | 3.37E-04 |
| 571.99   | 8.19E-04 | 583.4  | 0.12681 | 596.48 | 0.00353 | 570.744 | 0.00609 | 535.576 | 0.14341 | 695.646  | 3.42E-04 |
| 572.1175 | 8.06E-04 | 583.55 | 0.12641 | 596.61 | 0.00354 | 570.908 | 0.00605 | 535.832 | 0.13966 | 696.0095 | 3.47E-04 |
| 572.245  | 7.94E-04 | 583.7  | 0.126   | 596.74 | 0.00355 | 571.072 | 0.00601 | 536.088 | 0.13592 | 696.373  | 3.53E-04 |
| 572.3725 | 7.81E-04 | 583.85 | 0.12557 | 596.87 | 0.00356 | 571.236 | 0.00598 | 536.344 | 0.13219 | 696.7365 | 3.58E-04 |
| 572.5    | 7.69E-04 | 584    | 0.12513 | 597    | 0.00357 | 571.4   | 0.00595 | 536.6   | 0.12849 | 697.1    | 3.63E-04 |
| 572.6275 | 7.57E-04 | 584.15 | 0.12469 | 597.13 | 0.00357 | 571.564 | 0.00593 | 536.856 | 0.1248  | 697.4635 | 3.69E-04 |
| 572.755  | 7.46E-04 | 584.3  | 0.12423 | 597.26 | 0.00358 | 571.728 | 0.00591 | 537.112 | 0.12115 | 697.827  | 3.74E-04 |
| 572.8825 | 7.35E-04 | 584.45 | 0.12376 | 597.39 | 0.00359 | 571.892 | 0.00589 | 537.368 | 0.11752 | 698.1905 | 3.79E-04 |
| 573.01   | 7.23E-04 | 584.6  | 0.12327 | 597.52 | 0.0036  | 572.056 | 0.00588 | 537.624 | 0.11393 | 698.554  | 3.85E-04 |
| 573.1375 | 7.13E-04 | 584.75 | 0.12278 | 597.65 | 0.0036  | 572.22  | 0.00587 | 537.88  | 0.11038 | 698.9175 | 3.90E-04 |
| 573.265  | 7.02E-04 | 584.9  | 0.12228 | 597.78 | 0.00361 | 572.384 | 0.00586 | 538.136 | 0.10686 | 699.281  | 3.95E-04 |
| 573.3925 | 6.91E-04 | 585.05 | 0.12177 | 597.91 | 0.00362 | 572.548 | 0.00586 | 538.392 | 0.1034  | 699.6445 | 4.01E-04 |
| 573.52   | 6.81E-04 | 585.2  | 0.12125 | 598.04 | 0.00362 | 572.712 | 0.00586 | 538.648 | 0.09998 | 700.008  | 4.06E-04 |
| 573.6475 | 6.71E-04 | 585.35 | 0.12072 | 598.17 | 0.00363 | 572.876 | 0.00586 | 538.904 | 0.09661 | 700.3715 | 4.12E-04 |
| 573.775  | 6.62E-04 | 585.5  | 0.12018 | 598.3  | 0.00363 | 573.04  | 0.00587 | 539.16  | 0.09329 | 700.735  | 4.17E-04 |
| 573.9025 | 6.52E-04 | 585.65 | 0.11963 | 598.43 | 0.00364 | 573.204 | 0.00588 | 539.416 | 0.09003 | 701.0985 | 4.22E-04 |
| 574.03   | 6.43E-04 | 585.8  | 0.11908 | 598.56 | 0.00364 | 573.368 | 0.0059  | 539.672 | 0.08682 | 701.462  | 4.28E-04 |
| 574.1575 | 6.34E-04 | 585.95 | 0.11852 | 598.69 | 0.00365 | 573.532 | 0.00591 | 539.928 | 0.08368 | 701.8255 | 4.33E-04 |
| 574.285  | 6.25E-04 | 586.1  | 0.11795 | 598.82 | 0.00365 | 573.696 | 0.00594 | 540.184 | 0.0806  | 702.189  | 4.39E-04 |
| 574.4125 | 6.16E-04 | 586.25 | 0.11737 | 598.95 | 0.00365 | 573.86  | 0.00596 | 540.44  | 0.07758 | 702.5525 | 4.44E-04 |
| 574.54   | 6.08E-04 | 586.4  | 0.11679 | 599.08 | 0.00365 | 574.024 | 0.00599 | 540.696 | 0.07462 | 702.916  | 4.49E-04 |
| 574.6675 | 6.00E-04 | 586.55 | 0.11621 | 599.21 | 0.00366 | 574.188 | 0.00602 | 540.952 | 0.07174 | 703.2795 | 4.55E-04 |
| 574.795  | 5.92E-04 | 586.7  | 0.11561 | 599.34 | 0.00366 | 574.352 | 0.00605 | 541.208 | 0.06891 | 703.643  | 4.60E-04 |
| 574.9225 | 5.84E-04 | 586.85 | 0.11502 | 599.47 | 0.00366 | 574.516 | 0.00609 | 541.464 | 0.06616 | 704.0065 | 4.66E-04 |
| 575.05   | 5.76E-04 | 587    | 0.11441 | 599.6  | 0.00366 | 574.68  | 0.00613 | 541.72  | 0.06347 | 704.37   | 4.71E-04 |
| 575.1775 | 5.69E-04 | 587.15 | 0.11381 | 599.73 | 0.00366 | 574.844 | 0.00618 | 541.976 | 0.06086 | 704.7335 | 4.76E-04 |
| 575.305  | 5.62E-04 | 587.3  | 0.1132  | 599.86 | 0.00366 | 575.008 | 0.00623 | 542.232 | 0.05831 | 705.097  | 4.82E-04 |
| 575.4325 | 5.55E-04 | 587.45 | 0.11258 | 599.99 | 0.00366 | 575.172 | 0.00628 | 542.488 | 0.05584 | 705.4605 | 4.87E-04 |
| 575.56   | 5.48E-04 | 587.6  | 0.11197 | 600.12 | 0.00365 | 575.336 | 0.00633 | 542.744 | 0.05343 | 705.824  | 4.92E-04 |
| 575.6875 | 5.42E-04 | 587.75 | 0.11135 | 600.25 | 0.00365 | 575.5   | 0.00639 | 543     | 0.0511  | 706.1875 | 4.98E-04 |
| 575.815  | 5.35E-04 | 587.9  | 0.11072 | 600.38 | 0.00365 | 575.664 | 0.00645 | 543.256 | 0.04883 | 706.551  | 5.03E-04 |
| 575.9425 | 5.29E-04 | 588.05 | 0.1101  | 600.51 | 0.00365 | 575.828 | 0.00652 | 543.512 | 0.04664 | 706.9145 | 5.08E-04 |
| 576.07   | 5.23E-04 | 588.2  | 0.10947 | 600.64 | 0.00364 | 575.992 | 0.00659 | 543.768 | 0.04451 | 707.278  | 5.13E-04 |
| 576.1975 | 5.18E-04 | 588.35 | 0.10884 | 600.77 | 0.00364 | 576.156 | 0.00666 | 544.024 | 0.04246 | 707.6415 | 5.18E-04 |
| 576.325  | 5.12E-04 | 588.5  | 0.10822 | 600.9  | 0.00364 | 576.32  | 0.00674 | 544.28  | 0.04047 | 708.005  | 5.23E-04 |
| 576.4525 | 5.07E-04 | 588.65 | 0.10759 | 601.03 | 0.00363 | 576.484 | 0.00682 | 544.536 | 0.03855 | 708.3685 | 5.28E-04 |
| 576.58   | 5.02E-04 | 588.8  | 0.10696 | 601.16 | 0.00363 | 576.648 | 0.0069  | 544.792 | 0.0367  | 708.732  | 5.33E-04 |
| 576.7075 | 4.97E-04 | 588.95 | 0.10633 | 601.29 | 0.00362 | 576.812 | 0.00699 | 545.048 | 0.03492 | 709.0955 | 5.38E-04 |
| 576.835  | 4.92E-04 | 589.1  | 0.1057  | 601.42 | 0.00362 | 576.976 | 0.00708 | 545.304 | 0.0332  | 709.459  | 5.42E-04 |
| 576.9625 | 4.88E-04 | 589.25 | 0.10507 | 601.55 | 0.00361 | 577.14  | 0.00717 | 545.56  | 0.03154 | 709.8225 | 5.47E-04 |
| 577.09   | 4.83E-04 | 589.4  | 0.10444 | 601.68 | 0.0036  | 577.304 | 0.00727 | 545.816 | 0.02995 | 710.186  | 5.51E-04 |
| 577.2175 | 4.79E-04 | 589.55 | 0.10381 | 601.81 | 0.00359 | 577.468 | 0.00737 | 546.072 | 0.02842 | 710.5495 | 5.56E-04 |
| 577.345  | 4.75E-04 | 589.7  | 0.10319 | 601.94 | 0.00359 | 577.632 | 0.00747 | 546.328 | 0.02695 | 710.913  | 5.60E-04 |

|          |          |        |         |        |         |         |         |         |          |          |          |
|----------|----------|--------|---------|--------|---------|---------|---------|---------|----------|----------|----------|
| 577.4725 | 4.71E-04 | 589.85 | 0.10256 | 602.07 | 0.00358 | 577.796 | 0.00758 | 546.584 | 0.02554  | 711.2765 | 5.64E-04 |
| 577.6    | 4.68E-04 | 590    | 0.10194 | 602.2  | 0.00357 | 577.96  | 0.00769 | 546.84  | 0.02418  | 711.64   | 5.69E-04 |
| 577.7275 | 4.64E-04 | 590.15 | 0.10132 | 602.33 | 0.00356 | 578.124 | 0.0078  | 547.096 | 0.02289  | 712.0035 | 5.73E-04 |
| 577.855  | 4.61E-04 | 590.3  | 0.10071 | 602.46 | 0.00355 | 578.288 | 0.00792 | 547.352 | 0.02165  | 712.367  | 5.77E-04 |
| 577.9825 | 4.58E-04 | 590.45 | 0.1001  | 602.59 | 0.00354 | 578.452 | 0.00804 | 547.608 | 0.02046  | 712.7305 | 5.81E-04 |
| 578.11   | 4.55E-04 | 590.6  | 0.09949 | 602.72 | 0.00353 | 578.616 | 0.00817 | 547.864 | 0.01933  | 713.094  | 5.85E-04 |
| 578.2375 | 4.52E-04 | 590.75 | 0.09888 | 602.85 | 0.00352 | 578.78  | 0.0083  | 548.12  | 0.01824  | 713.4575 | 5.88E-04 |
| 578.365  | 4.50E-04 | 590.9  | 0.09828 | 602.98 | 0.00351 | 578.944 | 0.00843 | 548.376 | 0.01721  | 713.821  | 5.92E-04 |
| 578.4925 | 4.47E-04 | 591.05 | 0.09768 | 603.11 | 0.0035  | 579.108 | 0.00857 | 548.632 | 0.01622  | 714.1845 | 5.96E-04 |
| 578.62   | 4.45E-04 | 591.2  | 0.09708 | 603.24 | 0.00349 | 579.272 | 0.00871 | 548.888 | 0.01529  | 714.548  | 6.00E-04 |
| 578.7475 | 4.43E-04 | 591.35 | 0.09649 | 603.37 | 0.00348 | 579.436 | 0.00885 | 549.144 | 0.01439  | 714.9115 | 6.04E-04 |
| 578.875  | 4.41E-04 | 591.5  | 0.09591 | 603.5  | 0.00346 | 579.6   | 0.009   | 549.4   | 0.01354  | 715.275  | 6.08E-04 |
| 579.0025 | 4.39E-04 | 591.65 | 0.09532 | 603.63 | 0.00345 | 579.764 | 0.00915 | 549.656 | 0.01273  | 715.6385 | 6.12E-04 |
| 579.13   | 4.38E-04 | 591.8  | 0.09475 | 603.76 | 0.00344 | 579.928 | 0.0093  | 549.912 | 0.01196  | 716.002  | 6.17E-04 |
| 579.2575 | 4.37E-04 | 591.95 | 0.09418 | 603.89 | 0.00342 | 580.092 | 0.00946 | 550.168 | 0.01124  | 716.3655 | 6.21E-04 |
| 579.385  | 4.35E-04 | 592.1  | 0.09361 | 604.02 | 0.00341 | 580.256 | 0.00962 | 550.424 | 0.01054  | 716.729  | 6.26E-04 |
| 579.5125 | 4.34E-04 | 592.25 | 0.09305 | 604.15 | 0.00339 | 580.42  | 0.00979 | 550.68  | 0.00989  | 717.0925 | 6.31E-04 |
| 579.64   | 4.33E-04 | 592.4  | 0.0925  | 604.28 | 0.00338 | 580.584 | 0.00996 | 550.936 | 0.00927  | 717.456  | 6.36E-04 |
| 579.7675 | 4.33E-04 | 592.55 | 0.09195 | 604.41 | 0.00337 | 580.748 | 0.01013 | 551.192 | 0.00868  | 717.8195 | 6.42E-04 |
| 579.895  | 4.32E-04 | 592.7  | 0.0914  | 604.54 | 0.00335 | 580.912 | 0.01031 | 551.448 | 0.00813  | 718.183  | 6.48E-04 |
| 580.0225 | 4.32E-04 | 592.85 | 0.09087 | 604.67 | 0.00333 | 581.076 | 0.01049 | 551.704 | 0.0076   | 718.5465 | 6.55E-04 |
| 580.15   | 4.31E-04 | 593    | 0.09034 | 604.8  | 0.00332 | 581.24  | 0.01068 | 551.96  | 0.00711  | 718.91   | 6.63E-04 |
| 580.2775 | 4.31E-04 | 593.15 | 0.08981 | 604.93 | 0.0033  | 581.404 | 0.01086 | 552.216 | 0.00664  | 719.2735 | 6.71E-04 |
| 580.405  | 4.31E-04 | 593.3  | 0.08929 | 605.06 | 0.00329 | 581.568 | 0.01106 | 552.472 | 0.0062   | 719.637  | 6.80E-04 |
| 580.5325 | 4.31E-04 | 593.45 | 0.08878 | 605.19 | 0.00327 | 581.732 | 0.01125 | 552.728 | 0.00578  | 720.0005 | 6.89E-04 |
| 580.66   | 4.32E-04 | 593.6  | 0.08828 | 605.32 | 0.00325 | 581.896 | 0.01145 | 552.984 | 0.00539  | 720.364  | 7.00E-04 |
| 580.7875 | 4.32E-04 | 593.75 | 0.08778 | 605.45 | 0.00324 | 582.06  | 0.01166 | 553.24  | 0.00502  | 720.7275 | 7.12E-04 |
| 580.915  | 4.33E-04 | 593.9  | 0.08729 | 605.58 | 0.00322 | 582.224 | 0.01186 | 553.496 | 0.00468  | 721.091  | 7.25E-04 |
| 581.0425 | 4.34E-04 | 594.05 | 0.0868  | 605.71 | 0.0032  | 582.388 | 0.01207 | 553.752 | 0.00435  | 721.4545 | 7.39E-04 |
| 581.17   | 4.35E-04 | 594.2  | 0.08632 | 605.84 | 0.00318 | 582.552 | 0.01229 | 554.008 | 0.00405  | 721.818  | 7.55E-04 |
| 581.2975 | 4.36E-04 | 594.35 | 0.08585 | 605.97 | 0.00316 | 582.716 | 0.01251 | 554.264 | 0.00376  | 722.1815 | 7.72E-04 |
| 581.425  | 4.37E-04 | 594.5  | 0.08538 | 606.1  | 0.00315 | 582.88  | 0.01273 | 554.52  | 0.00349  | 722.545  | 7.91E-04 |
| 581.5525 | 4.39E-04 | 594.65 | 0.08493 | 606.23 | 0.00313 | 583.044 | 0.01296 | 554.776 | 0.00324  | 722.9085 | 8.12E-04 |
| 581.68   | 4.40E-04 | 594.8  | 0.08447 | 606.36 | 0.00311 | 583.208 | 0.01319 | 555.032 | 0.00301  | 723.272  | 8.34E-04 |
| 581.8075 | 4.42E-04 | 594.95 | 0.08403 | 606.49 | 0.00309 | 583.372 | 0.01342 | 555.288 | 0.00279  | 723.6355 | 8.59E-04 |
| 581.935  | 4.44E-04 | 595.1  | 0.08359 | 606.62 | 0.00307 | 583.536 | 0.01366 | 555.544 | 0.00258  | 723.999  | 8.85E-04 |
| 582.0625 | 4.46E-04 | 595.25 | 0.08316 | 606.75 | 0.00305 | 583.7   | 0.0139  | 555.8   | 0.00239  | 724.3625 | 9.15E-04 |
| 582.19   | 4.48E-04 | 595.4  | 0.08273 | 606.88 | 0.00303 | 583.864 | 0.01414 | 556.056 | 0.00221  | 724.726  | 9.46E-04 |
| 582.3175 | 4.51E-04 | 595.55 | 0.08232 | 607.01 | 0.00301 | 584.028 | 0.01439 | 556.312 | 0.00205  | 725.0895 | 9.81E-04 |
| 582.445  | 4.53E-04 | 595.7  | 0.08191 | 607.14 | 0.00299 | 584.192 | 0.01464 | 556.568 | 0.00189  | 725.453  | 0.00102  |
| 582.5725 | 4.56E-04 | 595.85 | 0.0815  | 607.27 | 0.00297 | 584.356 | 0.0149  | 556.824 | 0.00175  | 725.8165 | 0.00106  |
| 582.7    | 4.59E-04 | 596    | 0.0811  | 607.4  | 0.00295 | 584.52  | 0.01516 | 557.08  | 0.00161  | 726.18   | 0.0011   |
| 582.8275 | 4.62E-04 | 596.15 | 0.08071 | 607.53 | 0.00293 | 584.684 | 0.01542 | 557.336 | 0.00149  | 726.5435 | 0.00115  |
| 582.955  | 4.65E-04 | 596.3  | 0.08033 | 607.66 | 0.00291 | 584.848 | 0.01569 | 557.592 | 0.00137  | 726.907  | 0.0012   |
| 583.0825 | 4.69E-04 | 596.45 | 0.07995 | 607.79 | 0.00289 | 585.012 | 0.01596 | 557.848 | 0.00126  | 727.2705 | 0.00125  |
| 583.21   | 4.72E-04 | 596.6  | 0.07958 | 607.92 | 0.00287 | 585.176 | 0.01623 | 558.104 | 0.00116  | 727.634  | 0.00131  |
| 583.3375 | 4.76E-04 | 596.75 | 0.07921 | 608.05 | 0.00285 | 585.34  | 0.01651 | 558.36  | 0.00107  | 727.9975 | 0.00137  |
| 583.465  | 4.80E-04 | 596.9  | 0.07885 | 608.18 | 0.00283 | 585.504 | 0.01679 | 558.616 | 9.81E-04 | 728.361  | 0.00143  |
| 583.5925 | 4.84E-04 | 597.05 | 0.0785  | 608.31 | 0.0028  | 585.668 | 0.01707 | 558.872 | 9.01E-04 | 728.7245 | 0.0015   |
| 583.72   | 4.88E-04 | 597.2  | 0.07815 | 608.44 | 0.00278 | 585.832 | 0.01736 | 559.128 | 8.27E-04 | 729.088  | 0.00157  |
| 583.8475 | 4.93E-04 | 597.35 | 0.0778  | 608.57 | 0.00276 | 585.996 | 0.01765 | 559.384 | 7.59E-04 | 729.4515 | 0.00165  |

|          |          |        |         |        |         |         |         |         |          |          |         |
|----------|----------|--------|---------|--------|---------|---------|---------|---------|----------|----------|---------|
| 583.975  | 4.97E-04 | 597.5  | 0.07747 | 608.7  | 0.00274 | 586.16  | 0.01794 | 559.64  | 6.96E-04 | 729.815  | 0.00173 |
| 584.1025 | 5.02E-04 | 597.65 | 0.07714 | 608.83 | 0.00272 | 586.324 | 0.01824 | 559.896 | 6.37E-04 | 730.1785 | 0.00182 |
| 584.23   | 5.07E-04 | 597.8  | 0.07681 | 608.96 | 0.0027  | 586.488 | 0.01854 | 560.152 | 5.84E-04 | 730.542  | 0.00191 |
| 584.3575 | 5.12E-04 | 597.95 | 0.07649 | 609.09 | 0.00268 | 586.652 | 0.01884 | 560.408 | 5.34E-04 | 730.9055 | 0.002   |
| 584.485  | 5.18E-04 | 598.1  | 0.07617 | 609.22 | 0.00266 | 586.816 | 0.01915 | 560.664 | 4.88E-04 | 731.269  | 0.0021  |
| 584.6125 | 5.23E-04 | 598.25 | 0.07586 | 609.35 | 0.00263 | 586.98  | 0.01945 | 560.92  | 4.46E-04 | 731.6325 | 0.0022  |
| 584.74   | 5.29E-04 | 598.4  | 0.07556 | 609.48 | 0.00261 | 587.144 | 0.01977 | 561.176 | 4.08E-04 | 731.996  | 0.00231 |
| 584.8675 | 5.35E-04 | 598.55 | 0.07526 | 609.61 | 0.00259 | 587.308 | 0.02008 | 561.432 | 3.72E-04 | 732.3595 | 0.00242 |
| 584.995  | 5.41E-04 | 598.7  | 0.07496 | 609.74 | 0.00257 | 587.472 | 0.0204  | 561.688 | 3.39E-04 | 732.723  | 0.00254 |
| 585.1225 | 5.48E-04 | 598.85 | 0.07467 | 609.87 | 0.00255 | 587.636 | 0.02072 | 561.944 | 3.09E-04 | 733.0865 | 0.00266 |
| 585.25   | 5.54E-04 | 599    | 0.07438 | 610    | 0.00253 | 587.8   | 0.02104 | 562.2   | 2.82E-04 | 733.45   | 0.00278 |
| 585.3775 | 5.61E-04 | 599.15 | 0.0741  | 610.13 | 0.0025  | 587.964 | 0.02136 | 562.456 | 2.56E-04 | 733.8135 | 0.00291 |
| 585.505  | 5.68E-04 | 599.3  | 0.07382 | 610.26 | 0.00248 | 588.128 | 0.02169 | 562.712 | 2.33E-04 | 734.177  | 0.00304 |
| 585.6325 | 5.76E-04 | 599.45 | 0.07354 | 610.39 | 0.00246 | 588.292 | 0.02202 | 562.968 | 2.12E-04 | 734.5405 | 0.00318 |
| 585.76   | 5.83E-04 | 599.6  | 0.07327 | 610.52 | 0.00244 | 588.456 | 0.02235 | 563.224 | 1.93E-04 | 734.904  | 0.00332 |
| 585.8875 | 5.91E-04 | 599.75 | 0.073   | 610.65 | 0.00242 | 588.62  | 0.02269 | 563.48  | 1.75E-04 | 735.2675 | 0.00346 |
| 586.015  | 5.99E-04 | 599.9  | 0.07273 | 610.78 | 0.0024  | 588.784 | 0.02302 | 563.736 | 1.59E-04 | 735.631  | 0.00361 |
| 586.1425 | 6.07E-04 | 600.05 | 0.07247 | 610.91 | 0.00238 | 588.948 | 0.02336 | 563.992 | 1.44E-04 | 735.9945 | 0.00376 |
| 586.27   | 6.16E-04 | 600.2  | 0.07221 | 611.04 | 0.00236 | 589.112 | 0.0237  | 564.248 | 1.30E-04 | 736.358  | 0.00391 |
| 586.3975 | 6.24E-04 | 600.35 | 0.07195 | 611.17 | 0.00234 | 589.276 | 0.02404 | 564.504 | 1.18E-04 | 736.7215 | 0.00406 |
| 586.525  | 6.33E-04 | 600.5  | 0.07169 | 611.3  | 0.00231 | 589.44  | 0.02438 | 564.76  | 1.07E-04 | 737.085  | 0.00421 |
| 586.6525 | 6.43E-04 | 600.65 | 0.07144 | 611.43 | 0.00229 | 589.604 | 0.02473 | 565.016 | 9.67E-05 | 737.4485 | 0.00437 |
| 586.78   | 6.52E-04 | 600.8  | 0.07119 | 611.56 | 0.00227 | 589.768 | 0.02507 | 565.272 | 8.74E-05 | 737.812  | 0.00452 |
| 586.9075 | 6.62E-04 | 600.95 | 0.07094 | 611.69 | 0.00225 | 589.932 | 0.02542 | 565.528 | 7.90E-05 | 738.1755 | 0.00468 |
| 587.035  | 6.72E-04 | 601.1  | 0.07069 | 611.82 | 0.00223 | 590.096 | 0.02577 | 565.784 | 7.13E-05 | 738.539  | 0.00484 |
| 587.1625 | 6.83E-04 | 601.25 | 0.07044 | 611.95 | 0.00221 | 590.26  | 0.02612 | 566.04  | 6.43E-05 | 738.9025 | 0.005   |
| 587.29   | 6.93E-04 | 601.4  | 0.0702  | 612.08 | 0.00219 | 590.424 | 0.02647 | 566.296 | 5.80E-05 | 739.266  | 0.00515 |
| 587.4175 | 7.04E-04 | 601.55 | 0.06995 | 612.21 | 0.00217 | 590.588 | 0.02682 | 566.552 | 5.22E-05 | 739.6295 | 0.00531 |
| 587.545  | 7.15E-04 | 601.7  | 0.06971 | 612.34 | 0.00215 | 590.752 | 0.02717 | 566.808 | 4.70E-05 | 739.993  | 0.00546 |
| 587.6725 | 7.27E-04 | 601.85 | 0.06947 | 612.47 | 0.00213 | 590.916 | 0.02752 | 567.064 | 4.23E-05 | 740.3565 | 0.00561 |
| 587.8    | 7.39E-04 | 602    | 0.06923 | 612.6  | 0.00211 | 591.08  | 0.02788 | 567.32  | 3.81E-05 | 740.72   | 0.00576 |
| 587.9275 | 7.51E-04 | 602.15 | 0.06899 | 612.73 | 0.00209 | 591.244 | 0.02823 | 567.576 | 3.42E-05 | 741.0835 | 0.00591 |
| 588.055  | 7.64E-04 | 602.3  | 0.06875 | 612.86 | 0.00207 | 591.408 | 0.02858 | 567.832 | 3.07E-05 | 741.447  | 0.00605 |
| 588.1825 | 7.77E-04 | 602.45 | 0.06851 | 612.99 | 0.00205 | 591.572 | 0.02893 | 568.088 | 2.76E-05 | 741.8105 | 0.00618 |
| 588.31   | 7.90E-04 | 602.6  | 0.06827 | 613.12 | 0.00204 | 591.736 | 0.02929 | 568.344 | 2.47E-05 | 742.174  | 0.00632 |
| 588.4375 | 8.03E-04 | 602.75 | 0.06803 | 613.25 | 0.00202 | 591.9   | 0.02964 | 568.6   | 2.22E-05 | 742.5375 | 0.00645 |
| 588.565  | 8.17E-04 | 602.9  | 0.06779 | 613.38 | 0.002   | 592.064 | 0.02999 | 568.856 | 1.99E-05 | 742.901  | 0.00657 |
| 588.6925 | 8.31E-04 | 603.05 | 0.06754 | 613.51 | 0.00198 | 592.228 | 0.03034 | 569.112 | 1.78E-05 | 743.2645 | 0.00669 |
| 588.82   | 8.46E-04 | 603.2  | 0.0673  | 613.64 | 0.00196 | 592.392 | 0.03069 | 569.368 | 1.59E-05 | 743.628  | 0.0068  |
| 588.9475 | 8.61E-04 | 603.35 | 0.06706 | 613.77 | 0.00194 | 592.556 | 0.03104 | 569.624 | 1.42E-05 | 743.9915 | 0.0069  |
| 589.075  | 8.76E-04 | 603.5  | 0.06681 | 613.9  | 0.00193 | 592.72  | 0.03139 | 569.88  | 1.27E-05 | 744.355  | 0.007   |
| 589.2025 | 8.92E-04 | 603.65 | 0.06657 | 614.03 | 0.00191 | 592.884 | 0.03173 | 570.136 | 1.14E-05 | 744.7185 | 0.00709 |
| 589.33   | 9.08E-04 | 603.8  | 0.06632 | 614.16 | 0.00189 | 593.048 | 0.03208 | 570.392 | 1.01E-05 | 745.082  | 0.00717 |
| 589.4575 | 9.25E-04 | 603.95 | 0.06607 | 614.29 | 0.00187 | 593.212 | 0.03242 | 570.648 | 9.04E-06 | 745.4455 | 0.00725 |
| 589.585  | 9.42E-04 | 604.1  | 0.06582 | 614.42 | 0.00186 | 593.376 | 0.03276 | 570.904 | 8.06E-06 | 745.809  | 0.00732 |
| 589.7125 | 9.59E-04 | 604.25 | 0.06557 | 614.55 | 0.00184 | 593.54  | 0.0331  | 571.16  | 7.18E-06 | 746.1725 | 0.00737 |
| 589.84   | 9.77E-04 | 604.4  | 0.06532 | 614.68 | 0.00183 | 593.704 | 0.03344 | 571.416 | 6.39E-06 | 746.536  | 0.00743 |
| 589.9675 | 9.95E-04 | 604.55 | 0.06506 | 614.81 | 0.00181 | 593.868 | 0.03377 | 571.672 | 5.69E-06 | 746.8995 | 0.00747 |
| 590.095  | 0.00101  | 604.7  | 0.0648  | 614.94 | 0.00179 | 594.032 | 0.03411 | 571.928 | 5.06E-06 | 747.263  | 0.0075  |
| 590.2225 | 0.00103  | 604.85 | 0.06454 | 615.07 | 0.00178 | 594.196 | 0.03444 | 572.184 | 4.50E-06 | 747.6265 | 0.00753 |
| 590.35   | 0.00105  | 605    | 0.06428 | 615.2  | 0.00176 | 594.36  | 0.03476 | 572.44  | 3.99E-06 | 747.99   | 0.00754 |

|          |         |        |         |        |         |         |         |         |          |          |         |
|----------|---------|--------|---------|--------|---------|---------|---------|---------|----------|----------|---------|
| 590.4775 | 0.00107 | 605.15 | 0.06402 | 615.33 | 0.00175 | 594.524 | 0.03508 | 572.696 | 3.55E-06 | 748.3535 | 0.00755 |
| 590.605  | 0.00109 | 605.3  | 0.06375 | 615.46 | 0.00173 | 594.688 | 0.0354  | 572.952 | 3.15E-06 | 748.717  | 0.00755 |
| 590.7325 | 0.00111 | 605.45 | 0.06348 | 615.59 | 0.00172 | 594.852 | 0.03572 | 573.208 | 2.80E-06 | 749.0805 | 0.00754 |
| 590.86   | 0.00113 | 605.6  | 0.06321 | 615.72 | 0.0017  | 595.016 | 0.03603 | 573.464 | 2.48E-06 | 749.444  | 0.00753 |
| 590.9875 | 0.00116 | 605.75 | 0.06293 | 615.85 | 0.00169 | 595.18  | 0.03634 | 573.72  | 2.20E-06 | 749.8075 | 0.00751 |
| 591.115  | 0.00118 | 605.9  | 0.06265 | 615.98 | 0.00168 | 595.344 | 0.03665 | 573.976 | 1.95E-06 | 750.171  | 0.00747 |
| 591.2425 | 0.0012  | 606.05 | 0.06237 | 616.11 | 0.00166 | 595.508 | 0.03695 | 574.232 | 1.73E-06 | 750.5345 | 0.00744 |
| 591.37   | 0.00122 | 606.2  | 0.06208 | 616.24 | 0.00165 | 595.672 | 0.03724 | 574.488 | 1.54E-06 | 750.898  | 0.00739 |
| 591.4975 | 0.00125 | 606.35 | 0.0618  | 616.37 | 0.00164 | 595.836 | 0.03753 | 574.744 | 1.37E-06 | 751.2615 | 0.00734 |
| 591.625  | 0.00127 | 606.5  | 0.0615  | 616.5  | 0.00162 | 596     | 0.03782 | 575     | 1.22E-06 | 751.625  | 0.00728 |
| 591.7525 | 0.0013  | 606.65 | 0.06121 | 616.63 | 0.00161 | 596.164 | 0.0381  | 575.256 | 1.08E-06 | 751.9885 | 0.00722 |
| 591.88   | 0.00132 | 606.8  | 0.06091 | 616.76 | 0.0016  | 596.328 | 0.03838 | 575.512 | 9.67E-07 | 752.352  | 0.00715 |
| 592.0075 | 0.00135 | 606.95 | 0.06061 | 616.89 | 0.00159 | 596.492 | 0.03865 | 575.768 | 8.65E-07 | 752.7155 | 0.00708 |
| 592.135  | 0.00137 | 607.1  | 0.0603  | 617.02 | 0.00157 | 596.656 | 0.03892 | 576.024 | 7.77E-07 | 753.079  | 0.00701 |
| 592.2625 | 0.0014  | 607.25 | 0.05999 | 617.15 | 0.00156 | 596.82  | 0.03918 | 576.28  | 7.01E-07 | 753.4425 | 0.00693 |
| 592.39   | 0.00143 | 607.4  | 0.05968 | 617.28 | 0.00155 | 596.984 | 0.03943 | 576.536 | 6.36E-07 | 753.806  | 0.00685 |
| 592.5175 | 0.00146 | 607.55 | 0.05936 | 617.41 | 0.00154 | 597.148 | 0.03968 | 576.792 | 5.81E-07 | 754.1695 | 0.00677 |
| 592.645  | 0.00148 | 607.7  | 0.05904 | 617.54 | 0.00153 | 597.312 | 0.03992 | 577.048 | 5.35E-07 | 754.533  | 0.00668 |
| 592.7725 | 0.00151 | 607.85 | 0.05872 | 617.67 | 0.00152 | 597.476 | 0.04016 | 577.304 | 4.98E-07 | 754.8965 | 0.0066  |
| 592.9    | 0.00154 | 608    | 0.05839 | 617.8  | 0.00151 | 597.64  | 0.04039 | 577.56  | 4.68E-07 | 755.26   | 0.00651 |
| 593.0275 | 0.00157 | 608.15 | 0.05806 | 617.93 | 0.0015  | 597.804 | 0.04061 | 577.816 | 4.45E-07 | 755.6235 | 0.00643 |
| 593.155  | 0.0016  | 608.3  | 0.05772 | 618.06 | 0.00149 | 597.968 | 0.04083 | 578.072 | 4.29E-07 | 755.987  | 0.00634 |
| 593.2825 | 0.00164 | 608.45 | 0.05738 | 618.19 | 0.00148 | 598.132 | 0.04104 | 578.328 | 4.19E-07 | 756.3505 | 0.00626 |
| 593.41   | 0.00167 | 608.6  | 0.05704 | 618.32 | 0.00147 | 598.296 | 0.04124 | 578.584 | 4.16E-07 | 756.714  | 0.00618 |
| 593.5375 | 0.0017  | 608.75 | 0.05669 | 618.45 | 0.00146 | 598.46  | 0.04143 | 578.84  | 4.19E-07 | 757.0775 | 0.00611 |
| 593.665  | 0.00173 | 608.9  | 0.05634 | 618.58 | 0.00146 | 598.624 | 0.04162 | 579.096 | 4.27E-07 | 757.441  | 0.00603 |
| 593.7925 | 0.00177 | 609.05 | 0.05599 | 618.71 | 0.00145 | 598.788 | 0.0418  | 579.352 | 4.41E-07 | 757.8045 | 0.00596 |
| 593.92   | 0.0018  | 609.2  | 0.05563 | 618.84 | 0.00144 | 598.952 | 0.04197 | 579.608 | 4.61E-07 | 758.168  | 0.0059  |
| 594.0475 | 0.00184 | 609.35 | 0.05527 | 618.97 | 0.00143 | 599.116 | 0.04214 | 579.864 | 4.87E-07 | 758.5315 | 0.00584 |
| 594.175  | 0.00187 | 609.5  | 0.0549  | 619.1  | 0.00143 | 599.28  | 0.0423  | 580.12  | 5.19E-07 | 758.895  | 0.00579 |
| 594.3025 | 0.00191 | 609.65 | 0.05453 | 619.23 | 0.00142 | 599.444 | 0.04244 | 580.376 | 5.58E-07 | 759.2585 | 0.00574 |
| 594.43   | 0.00194 | 609.8  | 0.05416 | 619.36 | 0.00141 | 599.608 | 0.04258 | 580.632 | 6.03E-07 | 759.622  | 0.0057  |
| 594.5575 | 0.00198 | 609.95 | 0.05378 | 619.49 | 0.00141 | 599.772 | 0.04272 | 580.888 | 6.54E-07 | 759.9855 | 0.00567 |
| 594.685  | 0.00202 | 610.1  | 0.0534  | 619.62 | 0.0014  | 599.936 | 0.04284 | 581.144 | 7.14E-07 | 760.349  | 0.00564 |
| 594.8125 | 0.00206 | 610.25 | 0.05302 | 619.75 | 0.00139 | 600.1   | 0.04296 | 581.4   | 7.81E-07 | 760.7125 | 0.00562 |
| 594.94   | 0.0021  | 610.4  | 0.05263 | 619.88 | 0.00139 | 600.264 | 0.04307 | 581.656 | 8.56E-07 | 761.076  | 0.00561 |
| 595.0675 | 0.00214 | 610.55 | 0.05224 | 620.01 | 0.00138 | 600.428 | 0.04316 | 581.912 | 9.40E-07 | 761.4395 | 0.00561 |
| 595.195  | 0.00218 | 610.7  | 0.05184 | 620.14 | 0.00138 | 600.592 | 0.04325 | 582.168 | 1.03E-06 | 761.803  | 0.00561 |
| 595.3225 | 0.00222 | 610.85 | 0.05144 | 620.27 | 0.00138 | 600.756 | 0.04334 | 582.424 | 1.14E-06 | 762.1665 | 0.00563 |
| 595.45   | 0.00226 | 611    | 0.05104 | 620.4  | 0.00137 | 600.92  | 0.04341 | 582.68  | 1.25E-06 | 762.53   | 0.00565 |
| 595.5775 | 0.0023  | 611.15 | 0.05064 | 620.53 | 0.00137 | 601.084 | 0.04347 | 582.936 | 1.38E-06 | 762.8935 | 0.00568 |
| 595.705  | 0.00235 | 611.3  | 0.05023 | 620.66 | 0.00136 | 601.248 | 0.04353 | 583.192 | 1.52E-06 | 763.257  | 0.00572 |
| 595.8325 | 0.00239 | 611.45 | 0.04982 | 620.79 | 0.00136 | 601.412 | 0.04358 | 583.448 | 1.68E-06 | 763.6205 | 0.00576 |
| 595.96   | 0.00243 | 611.6  | 0.04941 | 620.92 | 0.00136 | 601.576 | 0.04361 | 583.704 | 1.85E-06 | 763.984  | 0.00582 |
| 596.0875 | 0.00248 | 611.75 | 0.04899 | 621.05 | 0.00135 | 601.74  | 0.04364 | 583.96  | 2.04E-06 | 764.3475 | 0.00588 |
| 596.215  | 0.00252 | 611.9  | 0.04857 | 621.18 | 0.00135 | 601.904 | 0.04366 | 584.216 | 2.24E-06 | 764.711  | 0.00595 |
| 596.3425 | 0.00257 | 612.05 | 0.04815 | 621.31 | 0.00135 | 602.068 | 0.04367 | 584.472 | 2.47E-06 | 765.0745 | 0.00602 |
| 596.47   | 0.00262 | 612.2  | 0.04772 | 621.44 | 0.00135 | 602.232 | 0.04367 | 584.728 | 2.71E-06 | 765.438  | 0.00611 |
| 596.5975 | 0.00267 | 612.35 | 0.04729 | 621.57 | 0.00135 | 602.396 | 0.04367 | 584.984 | 2.98E-06 | 765.8015 | 0.0062  |
| 596.725  | 0.00271 | 612.5  | 0.04686 | 621.7  | 0.00135 | 602.56  | 0.04365 | 585.24  | 3.28E-06 | 766.165  | 0.00629 |
| 596.8525 | 0.00276 | 612.65 | 0.04643 | 621.83 | 0.00135 | 602.724 | 0.04362 | 585.496 | 3.60E-06 | 766.5285 | 0.00639 |



|          |         |        |         |        |         |         |         |         |          |          |         |
|----------|---------|--------|---------|--------|---------|---------|---------|---------|----------|----------|---------|
| 596.98   | 0.00281 | 612.8  | 0.04599 | 621.96 | 0.00134 | 602.888 | 0.04359 | 585.752 | 3.95E-06 | 766.892  | 0.0065  |
| 597.1075 | 0.00286 | 612.95 | 0.04556 | 622.09 | 0.00134 | 603.052 | 0.04355 | 586.008 | 4.34E-06 | 767.2555 | 0.00661 |
| 597.235  | 0.00291 | 613.1  | 0.04512 | 622.22 | 0.00134 | 603.216 | 0.04349 | 586.264 | 4.75E-06 | 767.619  | 0.00672 |
| 597.3625 | 0.00296 | 613.25 | 0.04467 | 622.35 | 0.00134 | 603.38  | 0.04343 | 586.52  | 5.21E-06 | 767.9825 | 0.00684 |
| 597.49   | 0.00302 | 613.4  | 0.04423 | 622.48 | 0.00134 | 603.544 | 0.04336 | 586.776 | 5.70E-06 | 768.346  | 0.00696 |
| 597.6175 | 0.00307 | 613.55 | 0.04379 | 622.61 | 0.00135 | 603.708 | 0.04328 | 587.032 | 6.24E-06 | 768.7095 | 0.00708 |
| 597.745  | 0.00312 | 613.7  | 0.04334 | 622.74 | 0.00135 | 603.872 | 0.0432  | 587.288 | 6.83E-06 | 769.073  | 0.0072  |
| 597.8725 | 0.00318 | 613.85 | 0.04289 | 622.87 | 0.00135 | 604.036 | 0.0431  | 587.544 | 7.46E-06 | 769.4365 | 0.00732 |
| 598      | 0.00323 | 614    | 0.04244 | 623    | 0.00135 | 604.2   | 0.043   | 587.8   | 8.15E-06 | 769.8    | 0.00745 |
| 598.1275 | 0.00329 | 614.15 | 0.04199 | 623.13 | 0.00135 | 604.364 | 0.04288 | 588.056 | 8.90E-06 | 770.1635 | 0.00757 |
| 598.255  | 0.00334 | 614.3  | 0.04153 | 623.26 | 0.00135 | 604.528 | 0.04276 | 588.312 | 9.71E-06 | 770.527  | 0.00769 |
| 598.3825 | 0.0034  | 614.45 | 0.04108 | 623.39 | 0.00136 | 604.692 | 0.04263 | 588.568 | 1.06E-05 | 770.8905 | 0.00781 |
| 598.51   | 0.00345 | 614.6  | 0.04062 | 623.52 | 0.00136 | 604.856 | 0.04249 | 588.824 | 1.15E-05 | 771.254  | 0.00792 |
| 598.6375 | 0.00351 | 614.75 | 0.04017 | 623.65 | 0.00136 | 605.02  | 0.04235 | 589.08  | 1.26E-05 | 771.6175 | 0.00803 |
| 598.765  | 0.00357 | 614.9  | 0.03971 | 623.78 | 0.00137 | 605.184 | 0.04219 | 589.336 | 1.37E-05 | 771.981  | 0.00814 |
| 598.8925 | 0.00363 | 615.05 | 0.03925 | 623.91 | 0.00137 | 605.348 | 0.04203 | 589.592 | 1.49E-05 | 772.3445 | 0.00824 |
| 599.02   | 0.00369 | 615.2  | 0.03879 | 624.04 | 0.00137 | 605.512 | 0.04186 | 589.848 | 1.61E-05 | 772.708  | 0.00834 |
| 599.1475 | 0.00375 | 615.35 | 0.03834 | 624.17 | 0.00138 | 605.676 | 0.04169 | 590.104 | 1.75E-05 | 773.0715 | 0.00843 |
| 599.275  | 0.00381 | 615.5  | 0.03788 | 624.3  | 0.00138 | 605.84  | 0.0415  | 590.36  | 1.90E-05 | 773.435  | 0.00851 |
| 599.4025 | 0.00387 | 615.65 | 0.03742 | 624.43 | 0.00139 | 606.004 | 0.04131 | 590.616 | 2.06E-05 | 773.7985 | 0.00859 |
| 599.53   | 0.00393 | 615.8  | 0.03696 | 624.56 | 0.00139 | 606.168 | 0.04111 | 590.872 | 2.24E-05 | 774.162  | 0.00866 |
| 599.6575 | 0.00399 | 615.95 | 0.0365  | 624.69 | 0.0014  | 606.332 | 0.04091 | 591.128 | 2.42E-05 | 774.5255 | 0.00872 |
| 599.785  | 0.00405 | 616.1  | 0.03604 | 624.82 | 0.0014  | 606.496 | 0.04069 | 591.384 | 2.62E-05 | 774.889  | 0.00877 |
| 599.9125 | 0.00412 | 616.25 | 0.03558 | 624.95 | 0.00141 | 606.66  | 0.04047 | 591.64  | 2.84E-05 | 775.2525 | 0.00881 |
| 600.04   | 0.00418 | 616.4  | 0.03512 | 625.08 | 0.00142 | 606.824 | 0.04025 | 591.896 | 3.07E-05 | 775.616  | 0.00884 |
| 600.1675 | 0.00424 | 616.55 | 0.03466 | 625.21 | 0.00142 | 606.988 | 0.04001 | 592.152 | 3.32E-05 | 775.9795 | 0.00886 |
| 600.295  | 0.00431 | 616.7  | 0.03421 | 625.34 | 0.00143 | 607.152 | 0.03978 | 592.408 | 3.58E-05 | 776.343  | 0.00887 |
| 600.4225 | 0.00437 | 616.85 | 0.03375 | 625.47 | 0.00144 | 607.316 | 0.03953 | 592.664 | 3.87E-05 | 776.7065 | 0.00888 |
| 600.55   | 0.00444 | 617    | 0.03329 | 625.6  | 0.00145 | 607.48  | 0.03928 | 592.92  | 4.17E-05 | 777.07   | 0.00887 |
| 600.6775 | 0.0045  | 617.15 | 0.03284 | 625.73 | 0.00145 | 607.644 | 0.03903 | 593.176 | 4.50E-05 | 777.4335 | 0.00885 |
| 600.805  | 0.00457 | 617.3  | 0.03238 | 625.86 | 0.00146 | 607.808 | 0.03876 | 593.432 | 4.84E-05 | 777.797  | 0.00882 |
| 600.9325 | 0.00464 | 617.45 | 0.03193 | 625.99 | 0.00147 | 607.972 | 0.0385  | 593.688 | 5.22E-05 | 778.1605 | 0.00878 |
| 601.06   | 0.0047  | 617.6  | 0.03148 | 626.12 | 0.00148 | 608.136 | 0.03823 | 593.944 | 5.61E-05 | 778.524  | 0.00873 |
| 601.1875 | 0.00477 | 617.75 | 0.03103 | 626.25 | 0.00149 | 608.3   | 0.03795 | 594.2   | 6.03E-05 | 778.8875 | 0.00867 |
| 601.315  | 0.00484 | 617.9  | 0.03058 | 626.38 | 0.0015  | 608.464 | 0.03767 | 594.456 | 6.48E-05 | 779.251  | 0.0086  |
| 601.4425 | 0.00491 | 618.05 | 0.03013 | 626.51 | 0.00151 | 608.628 | 0.03738 | 594.712 | 6.96E-05 | 779.6145 | 0.00852 |
| 601.57   | 0.00498 | 618.2  | 0.02969 | 626.64 | 0.00152 | 608.792 | 0.03709 | 594.968 | 7.47E-05 | 779.978  | 0.00842 |
| 601.6975 | 0.00505 | 618.35 | 0.02924 | 626.77 | 0.00153 | 608.956 | 0.0368  | 595.224 | 8.02E-05 | 780.3415 | 0.00832 |
| 601.825  | 0.00511 | 618.5  | 0.0288  | 626.9  | 0.00154 | 609.12  | 0.0365  | 595.48  | 8.59E-05 | 780.705  | 0.00821 |
| 601.9525 | 0.00518 | 618.65 | 0.02836 | 627.03 | 0.00155 | 609.284 | 0.0362  | 595.736 | 9.21E-05 | 781.0685 | 0.0081  |
| 602.08   | 0.00525 | 618.8  | 0.02792 | 627.16 | 0.00156 | 609.448 | 0.0359  | 595.992 | 9.86E-05 | 781.432  | 0.00797 |
| 602.2075 | 0.00532 | 618.95 | 0.02749 | 627.29 | 0.00157 | 609.612 | 0.03559 | 596.248 | 1.05E-04 | 781.7955 | 0.00783 |
| 602.335  | 0.0054  | 619.1  | 0.02706 | 627.42 | 0.00159 | 609.776 | 0.03528 | 596.504 | 1.13E-04 | 782.159  | 0.00769 |
| 602.4625 | 0.00547 | 619.25 | 0.02663 | 627.55 | 0.0016  | 609.94  | 0.03497 | 596.76  | 1.21E-04 | 782.5225 | 0.00754 |
| 602.59   | 0.00554 | 619.4  | 0.0262  | 627.68 | 0.00161 | 610.104 | 0.03465 | 597.016 | 1.29E-04 | 782.886  | 0.00738 |
| 602.7175 | 0.00561 | 619.55 | 0.02577 | 627.81 | 0.00162 | 610.268 | 0.03433 | 597.272 | 1.37E-04 | 783.2495 | 0.00722 |
| 602.845  | 0.00568 | 619.7  | 0.02535 | 627.94 | 0.00164 | 610.432 | 0.03401 | 597.528 | 1.47E-04 | 783.613  | 0.00705 |
| 602.9725 | 0.00575 | 619.85 | 0.02493 | 628.07 | 0.00165 | 610.596 | 0.03369 | 597.784 | 1.56E-04 | 783.9765 | 0.00688 |
| 603.1    | 0.00583 | 620    | 0.02451 | 628.2  | 0.00166 | 610.76  | 0.03336 | 598.04  | 1.67E-04 | 784.34   | 0.0067  |
| 603.2275 | 0.0059  | 620.15 | 0.0241  | 628.33 | 0.00168 | 610.924 | 0.03304 | 598.296 | 1.77E-04 | 784.7035 | 0.00652 |
| 603.355  | 0.00597 | 620.3  | 0.02369 | 628.46 | 0.00169 | 611.088 | 0.03271 | 598.552 | 1.89E-04 | 785.067  | 0.00633 |

|          |         |        |         |        |         |         |         |         |          |          |          |
|----------|---------|--------|---------|--------|---------|---------|---------|---------|----------|----------|----------|
| 603.4825 | 0.00604 | 620.45 | 0.02328 | 628.59 | 0.00171 | 611.252 | 0.03238 | 598.808 | 2.01E-04 | 785.4305 | 0.00615  |
| 603.61   | 0.00612 | 620.6  | 0.02287 | 628.72 | 0.00172 | 611.416 | 0.03206 | 599.064 | 2.13E-04 | 785.794  | 0.00596  |
| 603.7375 | 0.00619 | 620.75 | 0.02247 | 628.85 | 0.00174 | 611.58  | 0.03173 | 599.32  | 2.27E-04 | 786.1575 | 0.00576  |
| 603.865  | 0.00626 | 620.9  | 0.02207 | 628.98 | 0.00176 | 611.744 | 0.0314  | 599.576 | 2.41E-04 | 786.521  | 0.00557  |
| 603.9925 | 0.00634 | 621.05 | 0.02168 | 629.11 | 0.00177 | 611.908 | 0.03107 | 599.832 | 2.55E-04 | 786.8845 | 0.00538  |
| 604.12   | 0.00641 | 621.2  | 0.02129 | 629.24 | 0.00179 | 612.072 | 0.03074 | 600.088 | 2.71E-04 | 787.248  | 0.00518  |
| 604.2475 | 0.00648 | 621.35 | 0.0209  | 629.37 | 0.00181 | 612.236 | 0.03041 | 600.344 | 2.87E-04 | 787.6115 | 0.00499  |
| 604.375  | 0.00656 | 621.5  | 0.02051 | 629.5  | 0.00182 | 612.4   | 0.03008 | 600.6   | 3.04E-04 | 787.975  | 0.0048   |
| 604.5025 | 0.00663 | 621.65 | 0.02013 | 629.63 | 0.00184 | 612.564 | 0.02975 | 600.856 | 3.22E-04 | 788.3385 | 0.00461  |
| 604.63   | 0.0067  | 621.8  | 0.01976 | 629.76 | 0.00186 | 612.728 | 0.02942 | 601.112 | 3.41E-04 | 788.702  | 0.00442  |
| 604.7575 | 0.00678 | 621.95 | 0.01938 | 629.89 | 0.00188 | 612.892 | 0.02909 | 601.368 | 3.61E-04 | 789.0655 | 0.00423  |
| 604.885  | 0.00685 | 622.1  | 0.01901 | 630.02 | 0.0019  | 613.056 | 0.02877 | 601.624 | 3.81E-04 | 789.429  | 0.00405  |
| 605.0125 | 0.00692 | 622.25 | 0.01865 | 630.15 | 0.00192 | 613.22  | 0.02844 | 601.88  | 4.03E-04 | 789.7925 | 0.00387  |
| 605.14   | 0.007   | 622.4  | 0.01829 | 630.28 | 0.00194 | 613.384 | 0.02812 | 602.136 | 4.25E-04 | 790.156  | 0.00369  |
| 605.2675 | 0.00707 | 622.55 | 0.01793 | 630.41 | 0.00196 | 613.548 | 0.0278  | 602.392 | 4.49E-04 | 790.5195 | 0.00351  |
| 605.395  | 0.00714 | 622.7  | 0.01757 | 630.54 | 0.00198 | 613.712 | 0.02747 | 602.648 | 4.73E-04 | 790.883  | 0.00334  |
| 605.5225 | 0.00722 | 622.85 | 0.01723 | 630.67 | 0.002   | 613.876 | 0.02716 | 602.904 | 4.99E-04 | 791.2465 | 0.00318  |
| 605.65   | 0.00729 | 623    | 0.01688 | 630.8  | 0.00202 | 614.04  | 0.02684 | 603.16  | 5.26E-04 | 791.61   | 0.00301  |
| 605.7775 | 0.00736 | 623.15 | 0.01654 | 630.93 | 0.00204 | 614.204 | 0.02652 | 603.416 | 5.54E-04 | 791.9735 | 0.00286  |
| 605.905  | 0.00744 | 623.3  | 0.0162  | 631.06 | 0.00207 | 614.368 | 0.02621 | 603.672 | 5.83E-04 | 792.337  | 0.0027   |
| 606.0325 | 0.00751 | 623.45 | 0.01587 | 631.19 | 0.00209 | 614.532 | 0.0259  | 603.928 | 6.13E-04 | 792.7005 | 0.00255  |
| 606.16   | 0.00758 | 623.6  | 0.01554 | 631.32 | 0.00211 | 614.696 | 0.02559 | 604.184 | 6.44E-04 | 793.064  | 0.00241  |
| 606.2875 | 0.00766 | 623.75 | 0.01521 | 631.45 | 0.00214 | 614.86  | 0.02529 | 604.44  | 6.77E-04 | 793.4275 | 0.00227  |
| 606.415  | 0.00773 | 623.9  | 0.01489 | 631.58 | 0.00216 | 615.024 | 0.02499 | 604.696 | 7.11E-04 | 793.791  | 0.00214  |
| 606.5425 | 0.0078  | 624.05 | 0.01458 | 631.71 | 0.00218 | 615.188 | 0.02469 | 604.952 | 7.47E-04 | 794.1545 | 0.00201  |
| 606.67   | 0.00788 | 624.2  | 0.01426 | 631.84 | 0.00221 | 615.352 | 0.02439 | 605.208 | 7.84E-04 | 794.518  | 0.00189  |
| 606.7975 | 0.00795 | 624.35 | 0.01396 | 631.97 | 0.00224 | 615.516 | 0.0241  | 605.464 | 8.22E-04 | 794.8815 | 0.00177  |
| 606.925  | 0.00802 | 624.5  | 0.01365 | 632.1  | 0.00226 | 615.68  | 0.02381 | 605.72  | 8.61E-04 | 795.245  | 0.00166  |
| 607.0525 | 0.00809 | 624.65 | 0.01335 | 632.23 | 0.00229 | 615.844 | 0.02352 | 605.976 | 9.03E-04 | 795.6085 | 0.00155  |
| 607.18   | 0.00816 | 624.8  | 0.01306 | 632.36 | 0.00231 | 616.008 | 0.02324 | 606.232 | 9.45E-04 | 795.972  | 0.00145  |
| 607.3075 | 0.00823 | 624.95 | 0.01277 | 632.49 | 0.00234 | 616.172 | 0.02296 | 606.488 | 9.90E-04 | 796.3355 | 0.00135  |
| 607.435  | 0.00831 | 625.1  | 0.01248 | 632.62 | 0.00237 | 616.336 | 0.02268 | 606.744 | 0.00104  | 796.699  | 0.00126  |
| 607.5625 | 0.00838 | 625.25 | 0.0122  | 632.75 | 0.0024  | 616.5   | 0.02241 | 607     | 0.00108  | 797.0625 | 0.00117  |
| 607.69   | 0.00845 | 625.4  | 0.01192 | 632.88 | 0.00242 | 616.664 | 0.02214 | 607.256 | 0.00113  | 797.426  | 0.00109  |
| 607.8175 | 0.00852 | 625.55 | 0.01165 | 633.01 | 0.00245 | 616.828 | 0.02188 | 607.512 | 0.00118  | 797.7895 | 0.00101  |
| 607.945  | 0.00859 | 625.7  | 0.01138 | 633.14 | 0.00248 | 616.992 | 0.02161 | 607.768 | 0.00124  | 798.153  | 9.35E-04 |
| 608.0725 | 0.00866 | 625.85 | 0.01111 | 633.27 | 0.00251 | 617.156 | 0.02136 | 608.024 | 0.00129  | 798.5165 | 8.65E-04 |
| 608.2    | 0.00873 | 626    | 0.01085 | 633.4  | 0.00254 | 617.32  | 0.0211  | 608.28  | 0.00135  | 798.88   | 8.00E-04 |
| 608.3275 | 0.0088  | 626.15 | 0.0106  | 633.53 | 0.00257 | 617.484 | 0.02085 | 608.536 | 0.0014   | 799.2435 | 7.38E-04 |
| 608.455  | 0.00886 | 626.3  | 0.01035 | 633.66 | 0.0026  | 617.648 | 0.02061 | 608.792 | 0.00146  | 799.607  | 6.80E-04 |
| 608.5825 | 0.00893 | 626.45 | 0.0101  | 633.79 | 0.00264 | 617.812 | 0.02037 | 609.048 | 0.00153  | 799.9705 | 6.26E-04 |
| 608.71   | 0.009   | 626.6  | 0.00986 | 633.92 | 0.00267 | 617.976 | 0.02013 | 609.304 | 0.00159  | 800.334  | 5.76E-04 |
| 608.8375 | 0.00907 | 626.75 | 0.00962 | 634.05 | 0.0027  | 618.14  | 0.0199  | 609.56  | 0.00166  | 800.6975 | 5.29E-04 |
| 608.965  | 0.00914 | 626.9  | 0.00938 | 634.18 | 0.00273 | 618.304 | 0.01967 | 609.816 | 0.00172  | 801.061  | 4.85E-04 |
| 609.0925 | 0.0092  | 627.05 | 0.00915 | 634.31 | 0.00277 | 618.468 | 0.01944 | 610.072 | 0.00179  | 801.4245 | 4.44E-04 |
| 609.22   | 0.00927 | 627.2  | 0.00893 | 634.44 | 0.0028  | 618.632 | 0.01922 | 610.328 | 0.00187  | 801.788  | 4.06E-04 |
| 609.3475 | 0.00934 | 627.35 | 0.00871 | 634.57 | 0.00283 | 618.796 | 0.019   | 610.584 | 0.00194  | 802.1515 | 3.71E-04 |
| 609.475  | 0.0094  | 627.5  | 0.00849 | 634.7  | 0.00287 | 618.96  | 0.01879 | 610.84  | 0.00202  | 802.515  | 3.38E-04 |
| 609.6025 | 0.00947 | 627.65 | 0.00827 | 634.83 | 0.0029  | 619.124 | 0.01858 | 611.096 | 0.0021   | 802.8785 | 3.08E-04 |
| 609.73   | 0.00953 | 627.8  | 0.00806 | 634.96 | 0.00294 | 619.288 | 0.01837 | 611.352 | 0.00218  | 803.242  | 2.80E-04 |
| 609.8575 | 0.0096  | 627.95 | 0.00786 | 635.09 | 0.00298 | 619.452 | 0.01817 | 611.608 | 0.00226  | 803.6055 | 2.54E-04 |

|          |         |        |         |        |         |         |         |         |         |          |          |
|----------|---------|--------|---------|--------|---------|---------|---------|---------|---------|----------|----------|
| 609.985  | 0.00966 | 628.1  | 0.00766 | 635.22 | 0.00301 | 619.616 | 0.01798 | 611.864 | 0.00235 | 803.969  | 2.31E-04 |
| 610.1125 | 0.00973 | 628.25 | 0.00746 | 635.35 | 0.00305 | 619.78  | 0.01778 | 612.12  | 0.00244 | 804.3325 | 2.09E-04 |
| 610.24   | 0.00979 | 628.4  | 0.00727 | 635.48 | 0.00309 | 619.944 | 0.01759 | 612.376 | 0.00253 | 804.696  | 1.89E-04 |
| 610.3675 | 0.00985 | 628.55 | 0.00708 | 635.61 | 0.00312 | 620.108 | 0.01741 | 612.632 | 0.00262 | 805.0595 | 1.71E-04 |
| 610.495  | 0.00992 | 628.7  | 0.00689 | 635.74 | 0.00316 | 620.272 | 0.01723 | 612.888 | 0.00272 | 805.423  | 1.54E-04 |
| 610.6225 | 0.00998 | 628.85 | 0.00671 | 635.87 | 0.0032  | 620.436 | 0.01705 | 613.144 | 0.00282 | 805.7865 | 1.39E-04 |
| 610.75   | 0.01004 | 629    | 0.00653 | 636    | 0.00324 | 620.6   | 0.01688 | 613.4   | 0.00292 | 806.15   | 1.25E-04 |
| 610.8775 | 0.0101  | 629.15 | 0.00636 | 636.13 | 0.00328 | 620.764 | 0.01671 | 613.656 | 0.00303 | 806.5135 | 1.12E-04 |
| 611.005  | 0.01016 | 629.3  | 0.00619 | 636.26 | 0.00332 | 620.928 | 0.01654 | 613.912 | 0.00314 | 806.877  | 1.01E-04 |
| 611.1325 | 0.01022 | 629.45 | 0.00602 | 636.39 | 0.00336 | 621.092 | 0.01638 | 614.168 | 0.00325 | 807.2405 | 9.05E-05 |
| 611.26   | 0.01028 | 629.6  | 0.00586 | 636.52 | 0.0034  | 621.256 | 0.01622 | 614.424 | 0.00337 | 807.604  | 8.10E-05 |
| 611.3875 | 0.01034 | 629.75 | 0.0057  | 636.65 | 0.00344 | 621.42  | 0.01607 | 614.68  | 0.00349 | 807.9675 | 7.25E-05 |
| 611.515  | 0.0104  | 629.9  | 0.00554 | 636.78 | 0.00348 | 621.584 | 0.01592 | 614.936 | 0.00361 | 808.331  | 6.47E-05 |
| 611.6425 | 0.01046 | 630.05 | 0.00539 | 636.91 | 0.00353 | 621.748 | 0.01577 | 615.192 | 0.00373 | 808.6945 | 5.77E-05 |
| 611.77   | 0.01052 | 630.2  | 0.00524 | 637.04 | 0.00357 | 621.912 | 0.01562 | 615.448 | 0.00386 | 809.058  | 5.14E-05 |
| 611.8975 | 0.01058 | 630.35 | 0.00509 | 637.17 | 0.00361 | 622.076 | 0.01548 | 615.704 | 0.00399 | 809.4215 | 4.57E-05 |
| 612.025  | 0.01064 | 630.5  | 0.00495 | 637.3  | 0.00365 | 622.24  | 0.01534 | 615.96  | 0.00413 | 809.785  | 4.06E-05 |
| 612.1525 | 0.0107  | 630.65 | 0.00481 | 637.43 | 0.0037  | 622.404 | 0.01521 | 616.216 | 0.00427 | 810.1485 | 3.60E-05 |
| 612.28   | 0.01075 | 630.8  | 0.00468 | 637.56 | 0.00374 | 622.568 | 0.01508 | 616.472 | 0.00442 | 810.512  | 3.19E-05 |
| 612.4075 | 0.01081 | 630.95 | 0.00454 | 637.69 | 0.00378 | 622.732 | 0.01495 | 616.728 | 0.00457 | 810.8755 | 2.82E-05 |
| 612.535  | 0.01087 | 631.1  | 0.00441 | 637.82 | 0.00383 | 622.896 | 0.01482 | 616.984 | 0.00472 | 811.239  | 2.49E-05 |
| 612.6625 | 0.01092 | 631.25 | 0.00429 | 637.95 | 0.00387 | 623.06  | 0.0147  | 617.24  | 0.00488 | 811.6025 | 2.20E-05 |
| 612.79   | 0.01098 | 631.4  | 0.00417 | 638.08 | 0.00392 | 623.224 | 0.01458 | 617.496 | 0.00504 | 811.966  | 1.94E-05 |
| 612.9175 | 0.01103 | 631.55 | 0.00405 | 638.21 | 0.00396 | 623.388 | 0.01446 | 617.752 | 0.00521 | 812.3295 | 1.71E-05 |
| 613.045  | 0.01109 | 631.7  | 0.00393 | 638.34 | 0.00401 | 623.552 | 0.01434 | 618.008 | 0.00538 | 812.693  | 1.50E-05 |
| 613.1725 | 0.01114 | 631.85 | 0.00381 | 638.47 | 0.00406 | 623.716 | 0.01423 | 618.264 | 0.00555 | 813.0565 | 1.32E-05 |
| 613.3    | 0.0112  | 632    | 0.0037  | 638.6  | 0.0041  | 623.88  | 0.01412 | 618.52  | 0.00574 | 813.42   | 1.15E-05 |
| 613.4275 | 0.01125 | 632.15 | 0.0036  | 638.73 | 0.00415 | 624.044 | 0.01401 | 618.776 | 0.00592 | 813.7835 | 1.01E-05 |
| 613.555  | 0.0113  | 632.3  | 0.00349 | 638.86 | 0.0042  | 624.208 | 0.01391 | 619.032 | 0.00612 | 814.147  | 8.83E-06 |
| 613.6825 | 0.01136 | 632.45 | 0.00339 | 638.99 | 0.00424 | 624.372 | 0.01381 | 619.288 | 0.00632 | 814.5105 | 7.71E-06 |
| 613.81   | 0.01141 | 632.6  | 0.00329 | 639.12 | 0.00429 | 624.536 | 0.0137  | 619.544 | 0.00652 | 814.874  | 6.72E-06 |
| 613.9375 | 0.01146 | 632.75 | 0.00319 | 639.25 | 0.00434 | 624.7   | 0.01361 | 619.8   | 0.00673 | 815.2375 | 5.86E-06 |
| 614.065  | 0.01151 | 632.9  | 0.0031  | 639.38 | 0.00439 | 624.864 | 0.01351 | 620.056 | 0.00695 | 815.601  | 5.09E-06 |
| 614.1925 | 0.01156 | 633.05 | 0.003   | 639.51 | 0.00443 | 625.028 | 0.01341 | 620.312 | 0.00717 | 815.9645 | 4.42E-06 |
| 614.32   | 0.01161 | 633.2  | 0.00291 | 639.64 | 0.00448 | 625.192 | 0.01332 | 620.568 | 0.0074  | 816.328  | 3.84E-06 |
| 614.4475 | 0.01167 | 633.35 | 0.00283 | 639.77 | 0.00453 | 625.356 | 0.01323 | 620.824 | 0.00764 | 816.6915 | 3.32E-06 |
| 614.575  | 0.01172 | 633.5  | 0.00274 | 639.9  | 0.00458 | 625.52  | 0.01314 | 621.08  | 0.00789 | 817.055  | 2.87E-06 |
| 614.7025 | 0.01177 | 633.65 | 0.00266 | 640.03 | 0.00463 | 625.684 | 0.01305 | 621.336 | 0.00814 | 817.4185 | 2.48E-06 |
| 614.83   | 0.01182 | 633.8  | 0.00258 | 640.16 | 0.00468 | 625.848 | 0.01296 | 621.592 | 0.0084  | 817.782  | 2.14E-06 |
| 614.9575 | 0.01187 | 633.95 | 0.0025  | 640.29 | 0.00473 | 626.012 | 0.01288 | 621.848 | 0.00867 | 818.1455 | 1.85E-06 |
| 615.085  | 0.01192 | 634.1  | 0.00243 | 640.42 | 0.00477 | 626.176 | 0.01279 | 622.104 | 0.00894 | 818.509  | 1.59E-06 |
| 615.2125 | 0.01197 | 634.25 | 0.00235 | 640.55 | 0.00482 | 626.34  | 0.01271 | 622.36  | 0.00923 | 818.8725 | 1.37E-06 |
| 615.34   | 0.01201 | 634.4  | 0.00228 | 640.68 | 0.00487 | 626.504 | 0.01263 | 622.616 | 0.00952 | 819.236  | 1.17E-06 |
| 615.4675 | 0.01206 | 634.55 | 0.00221 | 640.81 | 0.00492 | 626.668 | 0.01254 | 622.872 | 0.00982 | 819.5995 | 1.00E-06 |
| 615.595  | 0.01211 | 634.7  | 0.00215 | 640.94 | 0.00497 | 626.832 | 0.01246 | 623.128 | 0.01013 | 819.963  | 8.60E-07 |
| 615.7225 | 0.01216 | 634.85 | 0.00208 | 641.07 | 0.00502 | 626.996 | 0.01239 | 623.384 | 0.01045 | 820.3265 | 7.35E-07 |
| 615.85   | 0.01221 | 635    | 0.00202 | 641.2  | 0.00507 | 627.16  | 0.01231 | 623.64  | 0.01078 | 820.69   | 6.27E-07 |
| 615.9775 | 0.01225 | 635.15 | 0.00196 | 641.33 | 0.00512 | 627.324 | 0.01223 | 623.896 | 0.01113 | 821.0535 | 5.35E-07 |
| 616.105  | 0.0123  | 635.3  | 0.0019  | 641.46 | 0.00517 | 627.488 | 0.01215 | 624.152 | 0.01148 | 821.417  | 4.55E-07 |
| 616.2325 | 0.01235 | 635.45 | 0.00184 | 641.59 | 0.00522 | 627.652 | 0.01208 | 624.408 | 0.01184 | 821.7805 | 3.87E-07 |
| 616.36   | 0.0124  | 635.6  | 0.00178 | 641.72 | 0.00527 | 627.816 | 0.012   | 624.664 | 0.01221 | 822.144  | 3.29E-07 |

|          |         |        |          |        |         |         |         |         |         |          |          |
|----------|---------|--------|----------|--------|---------|---------|---------|---------|---------|----------|----------|
| 616.4875 | 0.01244 | 635.75 | 0.00173  | 641.85 | 0.00532 | 627.98  | 0.01192 | 624.92  | 0.01259 | 822.5075 | 2.79E-07 |
| 616.615  | 0.01249 | 635.9  | 0.00168  | 641.98 | 0.00536 | 628.144 | 0.01185 | 625.176 | 0.01299 | 822.871  | 2.36E-07 |
| 616.7425 | 0.01254 | 636.05 | 0.00163  | 642.11 | 0.00541 | 628.308 | 0.01177 | 625.432 | 0.01339 | 823.2345 | 2.00E-07 |
| 616.87   | 0.01258 | 636.2  | 0.00158  | 642.24 | 0.00546 | 628.472 | 0.0117  | 625.688 | 0.01381 | 823.598  | 1.69E-07 |
| 616.9975 | 0.01263 | 636.35 | 0.00153  | 642.37 | 0.00551 | 628.636 | 0.01162 | 625.944 | 0.01424 | 823.9615 | 1.42E-07 |
| 617.125  | 0.01268 | 636.5  | 0.00148  | 642.5  | 0.00556 | 628.8   | 0.01155 | 626.2   | 0.01468 | 824.325  | 1.20E-07 |
| 617.2525 | 0.01272 | 636.65 | 0.00144  | 642.63 | 0.00561 | 628.964 | 0.01148 | 626.456 | 0.01514 | 824.6885 | 1.01E-07 |
| 617.38   | 0.01277 | 636.8  | 0.0014   | 642.76 | 0.00565 | 629.128 | 0.0114  | 626.712 | 0.0156  | 825.052  | 8.48E-08 |
| 617.5075 | 0.01281 | 636.95 | 0.00135  | 642.89 | 0.0057  | 629.292 | 0.01133 | 626.968 | 0.01609 | 825.4155 | 7.12E-08 |
| 617.635  | 0.01286 | 637.1  | 0.00131  | 643.02 | 0.00575 | 629.456 | 0.01125 | 627.224 | 0.01658 | 825.779  | 5.97E-08 |
| 617.7625 | 0.0129  | 637.25 | 0.00127  | 643.15 | 0.0058  | 629.62  | 0.01118 | 627.48  | 0.01709 | 826.1425 | 4.99E-08 |
| 617.89   | 0.01295 | 637.4  | 0.00124  | 643.28 | 0.00584 | 629.784 | 0.01111 | 627.736 | 0.01761 | 826.506  | 4.17E-08 |
| 618.0175 | 0.01299 | 637.55 | 0.0012   | 643.41 | 0.00589 | 629.948 | 0.01103 | 627.992 | 0.01815 | 826.8695 | 3.48E-08 |
| 618.145  | 0.01304 | 637.7  | 0.00116  | 643.54 | 0.00594 | 630.112 | 0.01096 | 628.248 | 0.0187  | 827.233  | 2.90E-08 |
| 618.2725 | 0.01308 | 637.85 | 0.00113  | 643.67 | 0.00598 | 630.276 | 0.01088 | 628.504 | 0.01927 | 827.5965 | 2.42E-08 |
| 618.4    | 0.01313 | 638    | 0.0011   | 643.8  | 0.00603 | 630.44  | 0.01081 | 628.76  | 0.01985 | 827.96   | 2.01E-08 |
| 618.5275 | 0.01317 | 638.15 | 0.00106  | 643.93 | 0.00607 | 630.604 | 0.01073 | 629.016 | 0.02044 | 828.3235 | 1.67E-08 |
| 618.655  | 0.01322 | 638.3  | 0.00103  | 644.06 | 0.00612 | 630.768 | 0.01066 | 629.272 | 0.02105 | 828.687  | 1.38E-08 |
| 618.7825 | 0.01326 | 638.45 | 0.001    | 644.19 | 0.00616 | 630.932 | 0.01058 | 629.528 | 0.02168 | 829.0505 | 1.15E-08 |
| 618.91   | 0.0133  | 638.6  | 9.73E-04 | 644.32 | 0.0062  | 631.096 | 0.0105  | 629.784 | 0.02232 | 829.414  | 9.48E-09 |
| 619.0375 | 0.01335 | 638.75 | 9.45E-04 | 644.45 | 0.00625 | 631.26  | 0.01043 | 630.04  | 0.02298 | 829.7775 | 7.83E-09 |
| 619.165  | 0.01339 | 638.9  | 9.18E-04 | 644.58 | 0.00629 | 631.424 | 0.01035 | 630.296 | 0.02365 | 830.141  | 6.46E-09 |
| 619.2925 | 0.01343 | 639.05 | 8.92E-04 | 644.71 | 0.00633 | 631.588 | 0.01027 | 630.552 | 0.02434 | 830.5045 | 5.33E-09 |
| 619.42   | 0.01348 | 639.2  | 8.66E-04 | 644.84 | 0.00637 | 631.752 | 0.01019 | 630.808 | 0.02505 | 830.868  | 4.38E-09 |
| 619.5475 | 0.01352 | 639.35 | 8.42E-04 | 644.97 | 0.00641 | 631.916 | 0.01011 | 631.064 | 0.02577 | 831.2315 | 3.60E-09 |
| 619.675  | 0.01356 | 639.5  | 8.18E-04 | 645.1  | 0.00645 | 632.08  | 0.01003 | 631.32  | 0.0265  | 831.595  | 2.96E-09 |
| 619.8025 | 0.01361 | 639.65 | 7.95E-04 | 645.23 | 0.00649 | 632.244 | 0.00995 | 631.576 | 0.02726 | 831.9585 | 2.43E-09 |
| 619.93   | 0.01365 | 639.8  | 7.73E-04 | 645.36 | 0.00653 | 632.408 | 0.00987 | 631.832 | 0.02802 | 832.322  | 1.99E-09 |
| 620.0575 | 0.01369 | 639.95 | 7.52E-04 | 645.49 | 0.00657 | 632.572 | 0.00979 | 632.088 | 0.02881 | 832.6855 | 1.63E-09 |
| 620.185  | 0.01374 | 640.1  | 7.31E-04 | 645.62 | 0.00661 | 632.736 | 0.00971 | 632.344 | 0.02961 | 833.049  | 1.34E-09 |
| 620.3125 | 0.01378 | 640.25 | 7.11E-04 | 645.75 | 0.00665 | 632.9   | 0.00962 | 632.6   | 0.03042 | 833.4125 | 1.10E-09 |
| 620.44   | 0.01382 | 640.4  | 6.92E-04 | 645.88 | 0.00668 | 633.064 | 0.00954 | 632.856 | 0.03125 | 833.776  | 9.01E-10 |
| 620.5675 | 0.01386 | 640.55 | 6.74E-04 | 646.01 | 0.00672 | 633.228 | 0.00946 | 633.112 | 0.0321  | 834.1395 | 7.43E-10 |
| 620.695  | 0.01391 | 640.7  | 6.56E-04 | 646.14 | 0.00676 | 633.392 | 0.00937 | 633.368 | 0.03296 | 834.503  | 6.17E-10 |
| 620.8225 | 0.01395 | 640.85 | 6.38E-04 | 646.27 | 0.00679 | 633.556 | 0.00929 | 633.624 | 0.03383 | 834.8665 | 5.18E-10 |
| 620.95   | 0.01399 | 641    | 6.22E-04 | 646.4  | 0.00682 | 633.72  | 0.0092  | 633.88  | 0.03472 | 835.23   | 4.42E-10 |
| 621.0775 | 0.01403 | 641.15 | 6.05E-04 | 646.53 | 0.00686 | 633.884 | 0.00912 | 634.136 | 0.03562 | 835.5935 | 3.85E-10 |
| 621.205  | 0.01407 | 641.3  | 5.90E-04 | 646.66 | 0.00689 | 634.048 | 0.00903 | 634.392 | 0.03654 | 835.957  | 3.46E-10 |
| 621.3325 | 0.01412 | 641.45 | 5.75E-04 | 646.79 | 0.00692 | 634.212 | 0.00894 | 634.648 | 0.03747 | 836.3205 | 3.23E-10 |
| 621.46   | 0.01416 | 641.6  | 5.60E-04 | 646.92 | 0.00695 | 634.376 | 0.00885 | 634.904 | 0.03841 | 836.684  | 3.16E-10 |
| 621.5875 | 0.0142  | 641.75 | 5.46E-04 | 647.05 | 0.00698 | 634.54  | 0.00877 | 635.16  | 0.03937 | 837.0475 | 3.23E-10 |
| 621.715  | 0.01424 | 641.9  | 5.32E-04 | 647.18 | 0.00701 | 634.704 | 0.00868 | 635.416 | 0.04033 | 837.411  | 3.46E-10 |
| 621.8425 | 0.01428 | 642.05 | 5.19E-04 | 647.31 | 0.00703 | 634.868 | 0.00859 | 635.672 | 0.04131 | 837.7745 | 3.86E-10 |
| 621.97   | 0.01432 | 642.2  | 5.06E-04 | 647.44 | 0.00706 | 635.032 | 0.0085  | 635.928 | 0.04229 | 838.138  | 4.45E-10 |
| 622.0975 | 0.01436 | 642.35 | 4.94E-04 | 647.57 | 0.00709 | 635.196 | 0.00841 | 636.184 | 0.04329 | 838.5015 | 5.25E-10 |
| 622.225  | 0.0144  | 642.5  | 4.82E-04 | 647.7  | 0.00711 | 635.36  | 0.00832 | 636.44  | 0.04429 | 838.865  | 6.30E-10 |
| 622.3525 | 0.01444 | 642.65 | 4.70E-04 | 647.83 | 0.00714 | 635.524 | 0.00823 | 636.696 | 0.0453  | 839.2285 | 7.64E-10 |
| 622.48   | 0.01448 | 642.8  | 4.59E-04 | 647.96 | 0.00716 | 635.688 | 0.00813 | 636.952 | 0.04632 | 839.592  | 9.33E-10 |
| 622.6075 | 0.01452 | 642.95 | 4.48E-04 | 648.09 | 0.00718 | 635.852 | 0.00804 | 637.208 | 0.04735 | 839.9555 | 1.15E-09 |
| 622.735  | 0.01456 | 643.1  | 4.38E-04 | 648.22 | 0.0072  | 636.016 | 0.00795 | 637.464 | 0.04838 | 840.319  | 1.41E-09 |
| 622.8625 | 0.0146  | 643.25 | 4.28E-04 | 648.35 | 0.00722 | 636.18  | 0.00786 | 637.72  | 0.04941 | 840.6825 | 1.74E-09 |

|          |         |        |          |        |         |         |         |         |         |          |          |
|----------|---------|--------|----------|--------|---------|---------|---------|---------|---------|----------|----------|
| 622.99   | 0.01463 | 643.4  | 4.18E-04 | 648.48 | 0.00724 | 636.344 | 0.00776 | 637.976 | 0.05045 | 841.046  | 2.14E-09 |
| 623.1175 | 0.01467 | 643.55 | 4.08E-04 | 648.61 | 0.00726 | 636.508 | 0.00767 | 638.232 | 0.05149 | 841.4095 | 2.63E-09 |
| 623.245  | 0.01471 | 643.7  | 3.99E-04 | 648.74 | 0.00728 | 636.672 | 0.00758 | 638.488 | 0.05253 | 841.773  | 3.24E-09 |
| 623.3725 | 0.01475 | 643.85 | 3.90E-04 | 648.87 | 0.00729 | 636.836 | 0.00748 | 638.744 | 0.05357 | 842.1365 | 3.98E-09 |
| 623.5    | 0.01478 | 644    | 3.82E-04 | 649    | 0.00731 | 637     | 0.00739 | 639     | 0.05461 | 842.5    | 4.89E-09 |
| 623.6275 | 0.01482 | 644.15 | 3.73E-04 | 649.13 | 0.00732 | 637.164 | 0.00729 | 639.256 | 0.05565 | 842.8635 | 6.00E-09 |
| 623.755  | 0.01486 | 644.3  | 3.65E-04 | 649.26 | 0.00733 | 637.328 | 0.0072  | 639.512 | 0.05669 | 843.227  | 7.35E-09 |
| 623.8825 | 0.01489 | 644.45 | 3.57E-04 | 649.39 | 0.00735 | 637.492 | 0.0071  | 639.768 | 0.05772 | 843.5905 | 9.00E-09 |
| 624.01   | 0.01493 | 644.6  | 3.49E-04 | 649.52 | 0.00736 | 637.656 | 0.00701 | 640.024 | 0.05874 | 843.954  | 1.10E-08 |
| 624.1375 | 0.01496 | 644.75 | 3.42E-04 | 649.65 | 0.00737 | 637.82  | 0.00691 | 640.28  | 0.05975 | 844.3175 | 1.34E-08 |
| 624.265  | 0.015   | 644.9  | 3.35E-04 | 649.78 | 0.00737 | 637.984 | 0.00682 | 640.536 | 0.06076 | 844.681  | 1.64E-08 |
| 624.3925 | 0.01503 | 645.05 | 3.27E-04 | 649.91 | 0.00738 | 638.148 | 0.00672 | 640.792 | 0.06176 | 845.0445 | 1.99E-08 |
| 624.52   | 0.01506 | 645.2  | 3.21E-04 | 650.04 | 0.00739 | 638.312 | 0.00663 | 641.048 | 0.06274 | 845.408  | 2.42E-08 |
| 624.6475 | 0.01509 | 645.35 | 3.14E-04 | 650.17 | 0.00739 | 638.476 | 0.00653 | 641.304 | 0.06371 | 845.7715 | 2.94E-08 |
| 624.775  | 0.01513 | 645.5  | 3.07E-04 | 650.3  | 0.0074  | 638.64  | 0.00644 | 641.56  | 0.06467 | 846.135  | 3.57E-08 |
| 624.9025 | 0.01516 | 645.65 | 3.01E-04 | 650.43 | 0.0074  | 638.804 | 0.00635 | 641.816 | 0.06561 | 846.4985 | 4.32E-08 |
| 625.03   | 0.01519 | 645.8  | 2.95E-04 | 650.56 | 0.0074  | 638.968 | 0.00625 | 642.072 | 0.06653 | 846.862  | 5.23E-08 |
| 625.1575 | 0.01522 | 645.95 | 2.89E-04 | 650.69 | 0.0074  | 639.132 | 0.00616 | 642.328 | 0.06744 | 847.2255 | 6.31E-08 |
| 625.285  | 0.01525 | 646.1  | 2.83E-04 | 650.82 | 0.0074  | 639.296 | 0.00606 | 642.584 | 0.06832 | 847.589  | 7.61E-08 |
| 625.4125 | 0.01528 | 646.25 | 2.77E-04 | 650.95 | 0.0074  | 639.46  | 0.00597 | 642.84  | 0.06919 | 847.9525 | 9.17E-08 |
| 625.54   | 0.01531 | 646.4  | 2.72E-04 | 651.08 | 0.0074  | 639.624 | 0.00588 | 643.096 | 0.07003 | 848.316  | 1.10E-07 |
| 625.6675 | 0.01533 | 646.55 | 2.66E-04 | 651.21 | 0.00739 | 639.788 | 0.00578 | 643.352 | 0.07084 | 848.6795 | 1.33E-07 |
| 625.795  | 0.01536 | 646.7  | 2.61E-04 | 651.34 | 0.00739 | 639.952 | 0.00569 | 643.608 | 0.07163 | 849.043  | 1.59E-07 |
| 625.9225 | 0.01539 | 646.85 | 2.56E-04 | 651.47 | 0.00738 | 640.116 | 0.0056  | 643.864 | 0.07239 | 849.4065 | 1.91E-07 |
| 626.05   | 0.01541 | 647    | 2.51E-04 | 651.6  | 0.00738 | 640.28  | 0.00551 | 644.12  | 0.07313 | 849.77   | 2.28E-07 |
| 626.1775 | 0.01544 | 647.15 | 2.46E-04 | 651.73 | 0.00737 | 640.444 | 0.00541 | 644.376 | 0.07383 | 850.1335 | 2.73E-07 |
| 626.305  | 0.01546 | 647.3  | 2.41E-04 | 651.86 | 0.00736 | 640.608 | 0.00532 | 644.632 | 0.0745  | 850.497  | 3.25E-07 |
| 626.4325 | 0.01548 | 647.45 | 2.36E-04 | 651.99 | 0.00735 | 640.772 | 0.00523 | 644.888 | 0.07514 | 850.8605 | 3.88E-07 |
| 626.56   | 0.0155  | 647.6  | 2.31E-04 | 652.12 | 0.00734 | 640.936 | 0.00514 | 645.144 | 0.07575 | 851.224  | 4.62E-07 |
| 626.6875 | 0.01552 | 647.75 | 2.27E-04 | 652.25 | 0.00732 | 641.1   | 0.00505 | 645.4   | 0.07632 | 851.5875 | 5.49E-07 |
| 626.815  | 0.01554 | 647.9  | 2.22E-04 | 652.38 | 0.00731 | 641.264 | 0.00496 | 645.656 | 0.07685 | 851.951  | 6.52E-07 |
| 626.9425 | 0.01556 | 648.05 | 2.18E-04 | 652.51 | 0.00729 | 641.428 | 0.00488 | 645.912 | 0.07735 | 852.3145 | 7.73E-07 |
| 627.07   | 0.01558 | 648.2  | 2.14E-04 | 652.64 | 0.00728 | 641.592 | 0.00479 | 646.168 | 0.07781 | 852.678  | 9.15E-07 |
| 627.1975 | 0.0156  | 648.35 | 2.09E-04 | 652.77 | 0.00726 | 641.756 | 0.0047  | 646.424 | 0.07823 | 853.0415 | 1.08E-06 |
| 627.325  | 0.01562 | 648.5  | 2.05E-04 | 652.9  | 0.00724 | 641.92  | 0.00461 | 646.68  | 0.07861 | 853.405  | 1.28E-06 |
| 627.4525 | 0.01563 | 648.65 | 2.01E-04 | 653.03 | 0.00722 | 642.084 | 0.00453 | 646.936 | 0.07894 | 853.7685 | 1.51E-06 |
| 627.58   | 0.01565 | 648.8  | 1.97E-04 | 653.16 | 0.0072  | 642.248 | 0.00444 | 647.192 | 0.07924 | 854.132  | 1.78E-06 |
| 627.7075 | 0.01566 | 648.95 | 1.93E-04 | 653.29 | 0.00718 | 642.412 | 0.00436 | 647.448 | 0.07949 | 854.4955 | 2.09E-06 |
| 627.835  | 0.01567 | 649.1  | 1.90E-04 | 653.42 | 0.00716 | 642.576 | 0.00428 | 647.704 | 0.07971 | 854.859  | 2.45E-06 |
| 627.9625 | 0.01568 | 649.25 | 1.86E-04 | 653.55 | 0.00714 | 642.74  | 0.00419 | 647.96  | 0.07987 | 855.2225 | 2.88E-06 |
| 628.09   | 0.01569 | 649.4  | 1.82E-04 | 653.68 | 0.00711 | 642.904 | 0.00411 | 648.216 | 0.07999 | 855.586  | 3.37E-06 |
| 628.2175 | 0.0157  | 649.55 | 1.78E-04 | 653.81 | 0.00709 | 643.068 | 0.00403 | 648.472 | 0.08007 | 855.9495 | 3.95E-06 |
| 628.345  | 0.01571 | 649.7  | 1.75E-04 | 653.94 | 0.00706 | 643.232 | 0.00395 | 648.728 | 0.0801  | 856.313  | 4.61E-06 |
| 628.4725 | 0.01572 | 649.85 | 1.71E-04 | 654.07 | 0.00704 | 643.396 | 0.00387 | 648.984 | 0.08009 | 856.6765 | 5.39E-06 |
| 628.6    | 0.01572 | 650    | 1.68E-04 | 654.2  | 0.00701 | 643.56  | 0.0038  | 649.24  | 0.08003 | 857.04   | 6.28E-06 |
| 628.7275 | 0.01573 | 650.15 | 1.65E-04 | 654.33 | 0.00698 | 643.724 | 0.00372 | 649.496 | 0.07993 | 857.4035 | 7.31E-06 |
| 628.855  | 0.01573 | 650.3  | 1.61E-04 | 654.46 | 0.00695 | 643.888 | 0.00364 | 649.752 | 0.07978 | 857.767  | 8.49E-06 |
| 628.9825 | 0.01573 | 650.45 | 1.58E-04 | 654.59 | 0.00692 | 644.052 | 0.00357 | 650.008 | 0.07958 | 858.1305 | 9.86E-06 |
| 629.11   | 0.01573 | 650.6  | 1.55E-04 | 654.72 | 0.00689 | 644.216 | 0.00349 | 650.264 | 0.07934 | 858.494  | 1.14E-05 |
| 629.2375 | 0.01573 | 650.75 | 1.52E-04 | 654.85 | 0.00685 | 644.38  | 0.00342 | 650.52  | 0.07906 | 858.8575 | 1.32E-05 |
| 629.365  | 0.01573 | 650.9  | 1.48E-04 | 654.98 | 0.00682 | 644.544 | 0.00335 | 650.776 | 0.07873 | 859.221  | 1.53E-05 |

|          |         |        |          |        |         |         |         |         |         |          |          |
|----------|---------|--------|----------|--------|---------|---------|---------|---------|---------|----------|----------|
| 629.4925 | 0.01572 | 651.05 | 1.45E-04 | 655.11 | 0.00679 | 644.708 | 0.00328 | 651.032 | 0.07835 | 859.5845 | 1.77E-05 |
| 629.62   | 0.01572 | 651.2  | 1.42E-04 | 655.24 | 0.00675 | 644.872 | 0.00321 | 651.288 | 0.07793 | 859.948  | 2.04E-05 |
| 629.7475 | 0.01571 | 651.35 | 1.39E-04 | 655.37 | 0.00672 | 645.036 | 0.00314 | 651.544 | 0.07747 | 860.3115 | 2.35E-05 |
| 629.875  | 0.01571 | 651.5  | 1.36E-04 | 655.5  | 0.00668 | 645.2   | 0.00307 | 651.8   | 0.07697 | 860.675  | 2.70E-05 |
| 630.0025 | 0.0157  | 651.65 | 1.34E-04 | 655.63 | 0.00664 | 645.364 | 0.003   | 652.056 | 0.07642 | 861.0385 | 3.10E-05 |
| 630.13   | 0.01569 | 651.8  | 1.31E-04 | 655.76 | 0.0066  | 645.528 | 0.00294 | 652.312 | 0.07583 | 861.402  | 3.56E-05 |
| 630.2575 | 0.01567 | 651.95 | 1.28E-04 | 655.89 | 0.00656 | 645.692 | 0.00287 | 652.568 | 0.0752  | 861.7655 | 4.08E-05 |
| 630.385  | 0.01566 | 652.1  | 1.25E-04 | 656.02 | 0.00652 | 645.856 | 0.00281 | 652.824 | 0.07453 | 862.129  | 4.67E-05 |
| 630.5125 | 0.01565 | 652.25 | 1.22E-04 | 656.15 | 0.00648 | 646.02  | 0.00275 | 653.08  | 0.07383 | 862.4925 | 5.33E-05 |
| 630.64   | 0.01563 | 652.4  | 1.20E-04 | 656.28 | 0.00644 | 646.184 | 0.00268 | 653.336 | 0.07308 | 862.856  | 6.08E-05 |
| 630.7675 | 0.01561 | 652.55 | 1.17E-04 | 656.41 | 0.0064  | 646.348 | 0.00262 | 653.592 | 0.0723  | 863.2195 | 6.93E-05 |
| 630.895  | 0.01559 | 652.7  | 1.15E-04 | 656.54 | 0.00636 | 646.512 | 0.00257 | 653.848 | 0.07149 | 863.583  | 7.89E-05 |
| 631.0225 | 0.01557 | 652.85 | 1.12E-04 | 656.67 | 0.00632 | 646.676 | 0.00251 | 654.104 | 0.07064 | 863.9465 | 8.97E-05 |
| 631.15   | 0.01555 | 653    | 1.10E-04 | 656.8  | 0.00627 | 646.84  | 0.00245 | 654.36  | 0.06976 | 864.31   | 1.02E-04 |
| 631.2775 | 0.01553 | 653.15 | 1.07E-04 | 656.93 | 0.00623 | 647.004 | 0.00239 | 654.616 | 0.06885 | 864.6735 | 1.15E-04 |
| 631.405  | 0.0155  | 653.3  | 1.05E-04 | 657.06 | 0.00619 | 647.168 | 0.00234 | 654.872 | 0.06791 | 865.037  | 1.31E-04 |
| 631.5325 | 0.01548 | 653.45 | 1.02E-04 | 657.19 | 0.00614 | 647.332 | 0.00229 | 655.128 | 0.06694 | 865.4005 | 1.48E-04 |
| 631.66   | 0.01545 | 653.6  | 1.00E-04 | 657.32 | 0.0061  | 647.496 | 0.00223 | 655.384 | 0.06594 | 865.764  | 1.67E-04 |
| 631.7875 | 0.01542 | 653.75 | 9.77E-05 | 657.45 | 0.00605 | 647.66  | 0.00218 | 655.64  | 0.06492 | 866.1275 | 1.88E-04 |
| 631.915  | 0.01539 | 653.9  | 9.54E-05 | 657.58 | 0.00601 | 647.824 | 0.00213 | 655.896 | 0.06388 | 866.491  | 2.12E-04 |
| 632.0425 | 0.01536 | 654.05 | 9.32E-05 | 657.71 | 0.00596 | 647.988 | 0.00208 | 656.152 | 0.06281 | 866.8545 | 2.38E-04 |
| 632.17   | 0.01532 | 654.2  | 9.10E-05 | 657.84 | 0.00591 | 648.152 | 0.00204 | 656.408 | 0.06173 | 867.218  | 2.68E-04 |
| 632.2975 | 0.01529 | 654.35 | 8.88E-05 | 657.97 | 0.00586 | 648.316 | 0.00199 | 656.664 | 0.06062 | 867.5815 | 3.00E-04 |
| 632.425  | 0.01525 | 654.5  | 8.67E-05 | 658.1  | 0.00582 | 648.48  | 0.00194 | 656.92  | 0.0595  | 867.945  | 3.36E-04 |
| 632.5525 | 0.01521 | 654.65 | 8.46E-05 | 658.23 | 0.00577 | 648.644 | 0.0019  | 657.176 | 0.05836 | 868.3085 | 3.76E-04 |
| 632.68   | 0.01517 | 654.8  | 8.26E-05 | 658.36 | 0.00572 | 648.808 | 0.00185 | 657.432 | 0.05721 | 868.672  | 4.20E-04 |
| 632.8075 | 0.01513 | 654.95 | 8.06E-05 | 658.49 | 0.00567 | 648.972 | 0.00181 | 657.688 | 0.05605 | 869.0355 | 4.69E-04 |
| 632.935  | 0.01509 | 655.1  | 7.86E-05 | 658.62 | 0.00562 | 649.136 | 0.00177 | 657.944 | 0.05487 | 869.399  | 5.23E-04 |
| 633.0625 | 0.01504 | 655.25 | 7.67E-05 | 658.75 | 0.00558 | 649.3   | 0.00173 | 658.2   | 0.05369 | 869.7625 | 5.82E-04 |
| 633.19   | 0.015   | 655.4  | 7.47E-05 | 658.88 | 0.00553 | 649.464 | 0.00169 | 658.456 | 0.0525  | 870.126  | 6.47E-04 |
| 633.3175 | 0.01495 | 655.55 | 7.29E-05 | 659.01 | 0.00548 | 649.628 | 0.00165 | 658.712 | 0.0513  | 870.4895 | 7.18E-04 |
| 633.445  | 0.0149  | 655.7  | 7.10E-05 | 659.14 | 0.00543 | 649.792 | 0.00162 | 658.968 | 0.0501  | 870.853  | 7.95E-04 |
| 633.5725 | 0.01485 | 655.85 | 6.92E-05 | 659.27 | 0.00538 | 649.956 | 0.00158 | 659.224 | 0.0489  | 871.2165 | 8.81E-04 |
| 633.7    | 0.0148  | 656    | 6.74E-05 | 659.4  | 0.00533 | 650.12  | 0.00154 | 659.48  | 0.04769 | 871.58   | 9.74E-04 |
| 633.8275 | 0.01474 | 656.15 | 6.57E-05 | 659.53 | 0.00528 | 650.284 | 0.00151 | 659.736 | 0.04649 | 871.9435 | 0.00107  |
| 633.955  | 0.01469 | 656.3  | 6.40E-05 | 659.66 | 0.00523 | 650.448 | 0.00148 | 659.992 | 0.04529 | 872.307  | 0.00119  |
| 634.0825 | 0.01463 | 656.45 | 6.23E-05 | 659.79 | 0.00518 | 650.612 | 0.00145 | 660.248 | 0.04409 | 872.6705 | 0.00131  |
| 634.21   | 0.01457 | 656.6  | 6.07E-05 | 659.92 | 0.00513 | 650.776 | 0.00141 | 660.504 | 0.0429  | 873.034  | 0.00144  |
| 634.3375 | 0.01451 | 656.75 | 5.91E-05 | 660.05 | 0.00508 | 650.94  | 0.00138 | 660.76  | 0.04171 | 873.3975 | 0.00158  |
| 634.465  | 0.01445 | 656.9  | 5.75E-05 | 660.18 | 0.00503 | 651.104 | 0.00135 | 661.016 | 0.04053 | 873.761  | 0.00173  |
| 634.5925 | 0.01439 | 657.05 | 5.59E-05 | 660.31 | 0.00498 | 651.268 | 0.00133 | 661.272 | 0.03936 | 874.1245 | 0.00189  |
| 634.72   | 0.01433 | 657.2  | 5.44E-05 | 660.44 | 0.00493 | 651.432 | 0.0013  | 661.528 | 0.03819 | 874.488  | 0.00207  |
| 634.8475 | 0.01426 | 657.35 | 5.29E-05 | 660.57 | 0.00488 | 651.596 | 0.00127 | 661.784 | 0.03704 | 874.8515 | 0.00226  |
| 634.975  | 0.01419 | 657.5  | 5.15E-05 | 660.7  | 0.00483 | 651.76  | 0.00125 | 662.04  | 0.0359  | 875.215  | 0.00247  |
| 635.1025 | 0.01413 | 657.65 | 5.01E-05 | 660.83 | 0.00478 | 651.924 | 0.00122 | 662.296 | 0.03477 | 875.5785 | 0.00269  |
| 635.23   | 0.01406 | 657.8  | 4.87E-05 | 660.96 | 0.00474 | 652.088 | 0.0012  | 662.552 | 0.03366 | 875.942  | 0.00293  |
| 635.3575 | 0.01398 | 657.95 | 4.73E-05 | 661.09 | 0.00469 | 652.252 | 0.00118 | 662.808 | 0.03256 | 876.3055 | 0.00318  |
| 635.485  | 0.01391 | 658.1  | 4.59E-05 | 661.22 | 0.00464 | 652.416 | 0.00115 | 663.064 | 0.03148 | 876.669  | 0.00345  |
| 635.6125 | 0.01384 | 658.25 | 4.46E-05 | 661.35 | 0.00459 | 652.58  | 0.00113 | 663.32  | 0.03042 | 877.0325 | 0.00374  |
| 635.74   | 0.01376 | 658.4  | 4.34E-05 | 661.48 | 0.00454 | 652.744 | 0.00111 | 663.576 | 0.02937 | 877.396  | 0.00405  |
| 635.8675 | 0.01369 | 658.55 | 4.21E-05 | 661.61 | 0.00449 | 652.908 | 0.00109 | 663.832 | 0.02834 | 877.7595 | 0.00438  |

|          |         |        |          |        |         |         |          |         |         |          |         |
|----------|---------|--------|----------|--------|---------|---------|----------|---------|---------|----------|---------|
| 635.995  | 0.01361 | 658.7  | 4.09E-05 | 661.74 | 0.00445 | 653.072 | 0.00107  | 664.088 | 0.02733 | 878.123  | 0.00473 |
| 636.1225 | 0.01353 | 658.85 | 3.97E-05 | 661.87 | 0.0044  | 653.236 | 0.00105  | 664.344 | 0.02633 | 878.4865 | 0.0051  |
| 636.25   | 0.01345 | 659    | 3.85E-05 | 662    | 0.00435 | 653.4   | 0.00104  | 664.6   | 0.02536 | 878.85   | 0.00549 |
| 636.3775 | 0.01337 | 659.15 | 3.74E-05 | 662.13 | 0.00431 | 653.564 | 0.00102  | 664.856 | 0.02441 | 879.2135 | 0.0059  |
| 636.505  | 0.01329 | 659.3  | 3.63E-05 | 662.26 | 0.00426 | 653.728 | 0.001    | 665.112 | 0.02348 | 879.577  | 0.00634 |
| 636.6325 | 0.0132  | 659.45 | 3.52E-05 | 662.39 | 0.00422 | 653.892 | 9.88E-04 | 665.368 | 0.02257 | 879.9405 | 0.0068  |
| 636.76   | 0.01312 | 659.6  | 3.41E-05 | 662.52 | 0.00417 | 654.056 | 9.74E-04 | 665.624 | 0.02168 | 880.304  | 0.00728 |
| 636.8875 | 0.01303 | 659.75 | 3.31E-05 | 662.65 | 0.00413 | 654.22  | 9.60E-04 | 665.88  | 0.02081 | 880.6675 | 0.00779 |
| 637.015  | 0.01294 | 659.9  | 3.20E-05 | 662.78 | 0.00408 | 654.384 | 9.46E-04 | 666.136 | 0.01996 | 881.031  | 0.00832 |
| 637.1425 | 0.01286 | 660.05 | 3.10E-05 | 662.91 | 0.00404 | 654.548 | 9.34E-04 | 666.392 | 0.01914 | 881.3945 | 0.00887 |
| 637.27   | 0.01277 | 660.2  | 3.01E-05 | 663.04 | 0.004   | 654.712 | 9.22E-04 | 666.648 | 0.01834 | 881.758  | 0.00945 |
| 637.3975 | 0.01268 | 660.35 | 2.91E-05 | 663.17 | 0.00395 | 654.876 | 9.10E-04 | 666.904 | 0.01756 | 882.1215 | 0.01006 |
| 637.525  | 0.01258 | 660.5  | 2.82E-05 | 663.3  | 0.00391 | 655.04  | 8.99E-04 | 667.16  | 0.0168  | 882.485  | 0.01069 |
| 637.6525 | 0.01249 | 660.65 | 2.73E-05 | 663.43 | 0.00387 | 655.204 | 8.89E-04 | 667.416 | 0.01607 | 882.8485 | 0.01134 |
| 637.78   | 0.0124  | 660.8  | 2.64E-05 | 663.56 | 0.00383 | 655.368 | 8.79E-04 | 667.672 | 0.01536 | 883.212  | 0.01202 |
| 637.9075 | 0.0123  | 660.95 | 2.56E-05 | 663.69 | 0.00379 | 655.532 | 8.70E-04 | 667.928 | 0.01467 | 883.5755 | 0.01272 |
| 638.035  | 0.01221 | 661.1  | 2.48E-05 | 663.82 | 0.00375 | 655.696 | 8.61E-04 | 668.184 | 0.014   | 883.939  | 0.01345 |
| 638.1625 | 0.01211 | 661.25 | 2.40E-05 | 663.95 | 0.00371 | 655.86  | 8.53E-04 | 668.44  | 0.01335 | 884.3025 | 0.01419 |
| 638.29   | 0.01202 | 661.4  | 2.32E-05 | 664.08 | 0.00367 | 656.024 | 8.45E-04 | 668.696 | 0.01273 | 884.666  | 0.01496 |
| 638.4175 | 0.01192 | 661.55 | 2.24E-05 | 664.21 | 0.00363 | 656.188 | 8.38E-04 | 668.952 | 0.01212 | 885.0295 | 0.01575 |
| 638.545  | 0.01182 | 661.7  | 2.17E-05 | 664.34 | 0.0036  | 656.352 | 8.31E-04 | 669.208 | 0.01154 | 885.393  | 0.01656 |
| 638.6725 | 0.01172 | 661.85 | 2.09E-05 | 664.47 | 0.00356 | 656.516 | 8.25E-04 | 669.464 | 0.01098 | 885.7565 | 0.01739 |
| 638.8    | 0.01162 | 662    | 2.02E-05 | 664.6  | 0.00353 | 656.68  | 8.19E-04 | 669.72  | 0.01044 | 886.12   | 0.01824 |
| 638.9275 | 0.01152 | 662.15 | 1.96E-05 | 664.73 | 0.00349 | 656.844 | 8.13E-04 | 669.976 | 0.00992 | 886.4835 | 0.0191  |
| 639.055  | 0.01142 | 662.3  | 1.89E-05 | 664.86 | 0.00346 | 657.008 | 8.08E-04 | 670.232 | 0.00942 | 886.847  | 0.01998 |
| 639.1825 | 0.01132 | 662.45 | 1.82E-05 | 664.99 | 0.00342 | 657.172 | 8.03E-04 | 670.488 | 0.00894 | 887.2105 | 0.02087 |
| 639.31   | 0.01121 | 662.6  | 1.76E-05 | 665.12 | 0.00339 | 657.336 | 7.99E-04 | 670.744 | 0.00847 | 887.574  | 0.02177 |
| 639.4375 | 0.01111 | 662.75 | 1.70E-05 | 665.25 | 0.00336 | 657.5   | 7.95E-04 | 671     | 0.00803 | 887.9375 | 0.02268 |
| 639.565  | 0.01101 | 662.9  | 1.64E-05 | 665.38 | 0.00333 | 657.664 | 7.91E-04 | 671.256 | 0.0076  | 888.301  | 0.02359 |
| 639.6925 | 0.0109  | 663.05 | 1.58E-05 | 665.51 | 0.00329 | 657.828 | 7.88E-04 | 671.512 | 0.0072  | 888.6645 | 0.02451 |
| 639.82   | 0.0108  | 663.2  | 1.53E-05 | 665.64 | 0.00326 | 657.992 | 7.85E-04 | 671.768 | 0.00681 | 889.028  | 0.02544 |
| 639.9475 | 0.01069 | 663.35 | 1.47E-05 | 665.77 | 0.00324 | 658.156 | 7.82E-04 | 672.024 | 0.00643 | 889.3915 | 0.02636 |
| 640.075  | 0.01059 | 663.5  | 1.42E-05 | 665.9  | 0.00321 | 658.32  | 7.80E-04 | 672.28  | 0.00608 | 889.755  | 0.02728 |
| 640.2025 | 0.01048 | 663.65 | 1.37E-05 | 666.03 | 0.00318 | 658.484 | 7.78E-04 | 672.536 | 0.00574 | 890.1185 | 0.0282  |
| 640.33   | 0.01037 | 663.8  | 1.32E-05 | 666.16 | 0.00315 | 658.648 | 7.76E-04 | 672.792 | 0.00541 | 890.482  | 0.02911 |
| 640.4575 | 0.01027 | 663.95 | 1.27E-05 | 666.29 | 0.00313 | 658.812 | 7.74E-04 | 673.048 | 0.0051  | 890.8455 | 0.03001 |
| 640.585  | 0.01016 | 664.1  | 1.23E-05 | 666.42 | 0.0031  | 658.976 | 7.73E-04 | 673.304 | 0.00481 | 891.209  | 0.03089 |
| 640.7125 | 0.01005 | 664.25 | 1.18E-05 | 666.55 | 0.00308 | 659.14  | 7.71E-04 | 673.56  | 0.00453 | 891.5725 | 0.03176 |
| 640.84   | 0.00994 | 664.4  | 1.14E-05 | 666.68 | 0.00305 | 659.304 | 7.70E-04 | 673.816 | 0.00426 | 891.936  | 0.03261 |
| 640.9675 | 0.00983 | 664.55 | 1.09E-05 | 666.81 | 0.00303 | 659.468 | 7.70E-04 | 674.072 | 0.00401 | 892.2995 | 0.03344 |
| 641.095  | 0.00973 | 664.7  | 1.05E-05 | 666.94 | 0.00301 | 659.632 | 7.69E-04 | 674.328 | 0.00376 | 892.663  | 0.03425 |
| 641.2225 | 0.00962 | 664.85 | 1.01E-05 | 667.07 | 0.00299 | 659.796 | 7.69E-04 | 674.584 | 0.00353 | 893.0265 | 0.03503 |
| 641.35   | 0.00951 | 665    | 9.76E-06 | 667.2  | 0.00297 | 659.96  | 7.68E-04 | 674.84  | 0.00332 | 893.39   | 0.03578 |
| 641.4775 | 0.0094  | 665.15 | 9.39E-06 | 667.33 | 0.00295 | 660.124 | 7.68E-04 | 675.096 | 0.00311 | 893.7535 | 0.0365  |
| 641.605  | 0.00929 | 665.3  | 9.03E-06 | 667.46 | 0.00293 | 660.288 | 7.68E-04 | 675.352 | 0.00292 | 894.117  | 0.03719 |
| 641.7325 | 0.00918 | 665.45 | 8.68E-06 | 667.59 | 0.00291 | 660.452 | 7.68E-04 | 675.608 | 0.00273 | 894.4805 | 0.03783 |
| 641.86   | 0.00907 | 665.6  | 8.34E-06 | 667.72 | 0.0029  | 660.616 | 7.68E-04 | 675.864 | 0.00256 | 894.844  | 0.03844 |
| 641.9875 | 0.00896 | 665.75 | 8.02E-06 | 667.85 | 0.00288 | 660.78  | 7.69E-04 | 676.12  | 0.00239 | 895.2075 | 0.03901 |
| 642.115  | 0.00886 | 665.9  | 7.70E-06 | 667.98 | 0.00286 | 660.944 | 7.69E-04 | 676.376 | 0.00224 | 895.571  | 0.03954 |
| 642.2425 | 0.00875 | 666.05 | 7.40E-06 | 668.11 | 0.00285 | 661.108 | 7.69E-04 | 676.632 | 0.00209 | 895.9345 | 0.04002 |
| 642.37   | 0.00864 | 666.2  | 7.11E-06 | 668.24 | 0.00284 | 661.272 | 7.70E-04 | 676.888 | 0.00195 | 896.298  | 0.04045 |

|          |         |        |          |        |         |         |          |         |          |          |         |
|----------|---------|--------|----------|--------|---------|---------|----------|---------|----------|----------|---------|
| 642.4975 | 0.00853 | 666.35 | 6.83E-06 | 668.37 | 0.00282 | 661.436 | 7.71E-04 | 677.144 | 0.00182  | 896.6615 | 0.04083 |
| 642.625  | 0.00842 | 666.5  | 6.55E-06 | 668.5  | 0.00281 | 661.6   | 7.71E-04 | 677.4   | 0.0017   | 897.025  | 0.04117 |
| 642.7525 | 0.00831 | 666.65 | 6.29E-06 | 668.63 | 0.0028  | 661.764 | 7.72E-04 | 677.656 | 0.00158  | 897.3885 | 0.04145 |
| 642.88   | 0.0082  | 666.8  | 6.04E-06 | 668.76 | 0.00279 | 661.928 | 7.73E-04 | 677.912 | 0.00147  | 897.752  | 0.04168 |
| 643.0075 | 0.0081  | 666.95 | 5.79E-06 | 668.89 | 0.00278 | 662.092 | 7.73E-04 | 678.168 | 0.00137  | 898.1155 | 0.04186 |
| 643.135  | 0.00799 | 667.1  | 5.56E-06 | 669.02 | 0.00278 | 662.256 | 7.74E-04 | 678.424 | 0.00127  | 898.479  | 0.04198 |
| 643.2625 | 0.00788 | 667.25 | 5.33E-06 | 669.15 | 0.00277 | 662.42  | 7.75E-04 | 678.68  | 0.00118  | 898.8425 | 0.04205 |
| 643.39   | 0.00777 | 667.4  | 5.11E-06 | 669.28 | 0.00276 | 662.584 | 7.76E-04 | 678.936 | 0.0011   | 899.206  | 0.04207 |
| 643.5175 | 0.00767 | 667.55 | 4.90E-06 | 669.41 | 0.00276 | 662.748 | 7.76E-04 | 679.192 | 0.00102  | 899.5695 | 0.04203 |
| 643.645  | 0.00756 | 667.7  | 4.69E-06 | 669.54 | 0.00275 | 662.912 | 7.77E-04 | 679.448 | 9.48E-04 | 899.933  | 0.04194 |
| 643.7725 | 0.00746 | 667.85 | 4.50E-06 | 669.67 | 0.00275 | 663.076 | 7.78E-04 | 679.704 | 8.79E-04 | 900.2965 | 0.0418  |
| 643.9    | 0.00735 | 668    | 4.31E-06 | 669.8  | 0.00274 | 663.24  | 7.78E-04 | 679.96  | 8.14E-04 | 900.66   | 0.0416  |
| 644.0275 | 0.00725 | 668.15 | 4.12E-06 | 669.93 | 0.00274 | 663.404 | 7.79E-04 | 680.216 | 7.54E-04 | 901.0235 | 0.04135 |
| 644.155  | 0.00714 | 668.3  | 3.95E-06 | 670.06 | 0.00274 | 663.568 | 7.79E-04 | 680.472 | 6.98E-04 | 901.387  | 0.04105 |
| 644.2825 | 0.00704 | 668.45 | 3.78E-06 | 670.19 | 0.00274 | 663.732 | 7.80E-04 | 680.728 | 6.45E-04 | 901.7505 | 0.0407  |
| 644.41   | 0.00693 | 668.6  | 3.62E-06 | 670.32 | 0.00274 | 663.896 | 7.80E-04 | 680.984 | 5.97E-04 | 902.114  | 0.0403  |
| 644.5375 | 0.00683 | 668.75 | 3.46E-06 | 670.45 | 0.00274 | 664.06  | 7.81E-04 | 681.24  | 5.51E-04 | 902.4775 | 0.03985 |
| 644.665  | 0.00673 | 668.9  | 3.31E-06 | 670.58 | 0.00274 | 664.224 | 7.81E-04 | 681.496 | 5.09E-04 | 902.841  | 0.03937 |
| 644.7925 | 0.00662 | 669.05 | 3.17E-06 | 670.71 | 0.00275 | 664.388 | 7.81E-04 | 681.752 | 4.70E-04 | 903.2045 | 0.03883 |
| 644.92   | 0.00652 | 669.2  | 3.03E-06 | 670.84 | 0.00275 | 664.552 | 7.82E-04 | 682.008 | 4.34E-04 | 903.568  | 0.03826 |
| 645.0475 | 0.00642 | 669.35 | 2.90E-06 | 670.97 | 0.00276 | 664.716 | 7.82E-04 | 682.264 | 4.00E-04 | 903.9315 | 0.03765 |
| 645.175  | 0.00632 | 669.5  | 2.77E-06 | 671.1  | 0.00276 | 664.88  | 7.82E-04 | 682.52  | 3.69E-04 | 904.295  | 0.037   |
| 645.3025 | 0.00622 | 669.65 | 2.64E-06 | 671.23 | 0.00277 | 665.044 | 7.81E-04 | 682.776 | 3.40E-04 | 904.6585 | 0.03632 |
| 645.43   | 0.00612 | 669.8  | 2.53E-06 | 671.36 | 0.00277 | 665.208 | 7.81E-04 | 683.032 | 3.14E-04 | 905.022  | 0.03561 |
| 645.5575 | 0.00603 | 669.95 | 2.41E-06 | 671.49 | 0.00278 | 665.372 | 7.81E-04 | 683.288 | 2.89E-04 | 905.3855 | 0.03487 |
| 645.685  | 0.00593 | 670.1  | 2.30E-06 | 671.62 | 0.00279 | 665.536 | 7.80E-04 | 683.544 | 2.66E-04 | 905.749  | 0.0341  |
| 645.8125 | 0.00583 | 670.25 | 2.20E-06 | 671.75 | 0.0028  | 665.7   | 7.80E-04 | 683.8   | 2.46E-04 | 906.1125 | 0.03331 |
| 645.94   | 0.00573 | 670.4  | 2.10E-06 | 671.88 | 0.00281 | 665.864 | 7.79E-04 | 684.056 | 2.27E-04 | 906.476  | 0.0325  |
| 646.0675 | 0.00564 | 670.55 | 2.00E-06 | 672.01 | 0.00282 | 666.028 | 7.78E-04 | 684.312 | 2.09E-04 | 906.8395 | 0.03167 |
| 646.195  | 0.00554 | 670.7  | 1.91E-06 | 672.14 | 0.00283 | 666.192 | 7.78E-04 | 684.568 | 1.93E-04 | 907.203  | 0.03082 |
| 646.3225 | 0.00545 | 670.85 | 1.82E-06 | 672.27 | 0.00284 | 666.356 | 7.76E-04 | 684.824 | 1.78E-04 | 907.5665 | 0.02997 |
| 646.45   | 0.00536 | 671    | 1.74E-06 | 672.4  | 0.00286 | 666.52  | 7.75E-04 | 685.08  | 1.65E-04 | 907.93   | 0.0291  |
| 646.5775 | 0.00527 | 671.15 | 1.66E-06 | 672.53 | 0.00287 | 666.684 | 7.74E-04 | 685.336 | 1.53E-04 | 908.2935 | 0.02823 |
| 646.705  | 0.00517 | 671.3  | 1.58E-06 | 672.66 | 0.00289 | 666.848 | 7.73E-04 | 685.592 | 1.42E-04 | 908.657  | 0.02735 |
| 646.8325 | 0.00508 | 671.45 | 1.51E-06 | 672.79 | 0.0029  | 667.012 | 7.71E-04 | 685.848 | 1.33E-04 | 909.0205 | 0.02646 |
| 646.96   | 0.00499 | 671.6  | 1.44E-06 | 672.92 | 0.00292 | 667.176 | 7.69E-04 | 686.104 | 1.24E-04 | 909.384  | 0.02558 |
| 647.0875 | 0.0049  | 671.75 | 1.37E-06 | 673.05 | 0.00293 | 667.34  | 7.67E-04 | 686.36  | 1.16E-04 | 909.7475 | 0.0247  |
| 647.215  | 0.00482 | 671.9  | 1.30E-06 | 673.18 | 0.00295 | 667.504 | 7.65E-04 | 686.616 | 1.10E-04 | 910.111  | 0.02382 |
| 647.3425 | 0.00473 | 672.05 | 1.24E-06 | 673.31 | 0.00297 | 667.668 | 7.63E-04 | 686.872 | 1.04E-04 | 910.4745 | 0.02296 |
| 647.47   | 0.00464 | 672.2  | 1.18E-06 | 673.44 | 0.00299 | 667.832 | 7.61E-04 | 687.128 | 9.89E-05 | 910.838  | 0.02209 |
| 647.5975 | 0.00456 | 672.35 | 1.12E-06 | 673.57 | 0.00301 | 667.996 | 7.59E-04 | 687.384 | 9.48E-05 | 911.2015 | 0.02124 |
| 647.725  | 0.00447 | 672.5  | 1.07E-06 | 673.7  | 0.00303 | 668.16  | 7.56E-04 | 687.64  | 9.14E-05 | 911.565  | 0.0204  |
| 647.8525 | 0.00439 | 672.65 | 1.02E-06 | 673.83 | 0.00305 | 668.324 | 7.53E-04 | 687.896 | 8.89E-05 | 911.9285 | 0.01958 |
| 647.98   | 0.00431 | 672.8  | 9.68E-07 | 673.96 | 0.00307 | 668.488 | 7.51E-04 | 688.152 | 8.71E-05 | 912.292  | 0.01877 |
| 648.1075 | 0.00422 | 672.95 | 9.20E-07 | 674.09 | 0.00309 | 668.652 | 7.48E-04 | 688.408 | 8.60E-05 | 912.6555 | 0.01797 |
| 648.235  | 0.00414 | 673.1  | 8.75E-07 | 674.22 | 0.00311 | 668.816 | 7.45E-04 | 688.664 | 8.56E-05 | 913.019  | 0.01719 |
| 648.3625 | 0.00406 | 673.25 | 8.32E-07 | 674.35 | 0.00314 | 668.98  | 7.41E-04 | 688.92  | 8.60E-05 | 913.3825 | 0.01643 |
| 648.49   | 0.00398 | 673.4  | 7.90E-07 | 674.48 | 0.00316 | 669.144 | 7.38E-04 | 689.176 | 8.71E-05 | 913.746  | 0.01569 |
| 648.6175 | 0.00391 | 673.55 | 7.51E-07 | 674.61 | 0.00319 | 669.308 | 7.34E-04 | 689.432 | 8.89E-05 | 914.1095 | 0.01497 |
| 648.745  | 0.00383 | 673.7  | 7.13E-07 | 674.74 | 0.00321 | 669.472 | 7.31E-04 | 689.688 | 9.14E-05 | 914.473  | 0.01427 |
| 648.8725 | 0.00375 | 673.85 | 6.77E-07 | 674.87 | 0.00324 | 669.636 | 7.27E-04 | 689.944 | 9.46E-05 | 914.8365 | 0.0136  |



|          |         |        |          |        |         |         |          |         |          |          |          |
|----------|---------|--------|----------|--------|---------|---------|----------|---------|----------|----------|----------|
| 649      | 0.00368 | 674    | 6.43E-07 | 675    | 0.00326 | 669.8   | 7.23E-04 | 690.2   | 9.85E-05 | 915.2    | 0.01294  |
| 649.1275 | 0.0036  | 674.15 | 6.11E-07 | 675.13 | 0.00329 | 669.964 | 7.19E-04 | 690.456 | 1.03E-04 | 915.5635 | 0.01231  |
| 649.255  | 0.00353 | 674.3  | 5.80E-07 | 675.26 | 0.00332 | 670.128 | 7.15E-04 | 690.712 | 1.09E-04 | 915.927  | 0.01169  |
| 649.3825 | 0.00346 | 674.45 | 5.50E-07 | 675.39 | 0.00335 | 670.292 | 7.10E-04 | 690.968 | 1.15E-04 | 916.2905 | 0.0111   |
| 649.51   | 0.00339 | 674.6  | 5.22E-07 | 675.52 | 0.00337 | 670.456 | 7.06E-04 | 691.224 | 1.22E-04 | 916.654  | 0.01054  |
| 649.6375 | 0.00332 | 674.75 | 4.95E-07 | 675.65 | 0.0034  | 670.62  | 7.01E-04 | 691.48  | 1.30E-04 | 917.0175 | 0.00999  |
| 649.765  | 0.00325 | 674.9  | 4.69E-07 | 675.78 | 0.00343 | 670.784 | 6.97E-04 | 691.736 | 1.39E-04 | 917.381  | 0.00947  |
| 649.8925 | 0.00318 | 675.05 | 4.45E-07 | 675.91 | 0.00346 | 670.948 | 6.92E-04 | 691.992 | 1.48E-04 | 917.7445 | 0.00897  |
| 650.02   | 0.00311 | 675.2  | 4.22E-07 | 676.04 | 0.00349 | 671.112 | 6.87E-04 | 692.248 | 1.59E-04 | 918.108  | 0.00849  |
| 650.1475 | 0.00304 | 675.35 | 4.00E-07 | 676.17 | 0.00353 | 671.276 | 6.82E-04 | 692.504 | 1.71E-04 | 918.4715 | 0.00803  |
| 650.275  | 0.00298 | 675.5  | 3.79E-07 | 676.3  | 0.00356 | 671.44  | 6.77E-04 | 692.76  | 1.83E-04 | 918.835  | 0.0076   |
| 650.4025 | 0.00291 | 675.65 | 3.59E-07 | 676.43 | 0.00359 | 671.604 | 6.72E-04 | 693.016 | 1.97E-04 | 919.1985 | 0.00718  |
| 650.53   | 0.00285 | 675.8  | 3.40E-07 | 676.56 | 0.00362 | 671.768 | 6.66E-04 | 693.272 | 2.12E-04 | 919.562  | 0.00678  |
| 650.6575 | 0.00279 | 675.95 | 3.22E-07 | 676.69 | 0.00366 | 671.932 | 6.61E-04 | 693.528 | 2.28E-04 | 919.9255 | 0.00641  |
| 650.785  | 0.00272 | 676.1  | 3.05E-07 | 676.82 | 0.00369 | 672.096 | 6.55E-04 | 693.784 | 2.46E-04 | 920.289  | 0.00605  |
| 650.9125 | 0.00266 | 676.25 | 2.89E-07 | 676.95 | 0.00372 | 672.26  | 6.50E-04 | 694.04  | 2.64E-04 | 920.6525 | 0.00571  |
| 651.04   | 0.0026  | 676.4  | 2.73E-07 | 677.08 | 0.00376 | 672.424 | 6.44E-04 | 694.296 | 2.85E-04 | 921.016  | 0.00538  |
| 651.1675 | 0.00255 | 676.55 | 2.59E-07 | 677.21 | 0.00379 | 672.588 | 6.38E-04 | 694.552 | 3.06E-04 | 921.3795 | 0.00508  |
| 651.295  | 0.00249 | 676.7  | 2.45E-07 | 677.34 | 0.00383 | 672.752 | 6.32E-04 | 694.808 | 3.30E-04 | 921.743  | 0.00479  |
| 651.4225 | 0.00243 | 676.85 | 2.32E-07 | 677.47 | 0.00386 | 672.916 | 6.26E-04 | 695.064 | 3.54E-04 | 922.1065 | 0.00451  |
| 651.55   | 0.00237 | 677    | 2.19E-07 | 677.6  | 0.0039  | 673.08  | 6.20E-04 | 695.32  | 3.81E-04 | 922.47   | 0.00425  |
| 651.6775 | 0.00232 | 677.15 | 2.08E-07 | 677.73 | 0.00394 | 673.244 | 6.14E-04 | 695.576 | 4.10E-04 | 922.8335 | 0.00401  |
| 651.805  | 0.00227 | 677.3  | 1.96E-07 | 677.86 | 0.00397 | 673.408 | 6.08E-04 | 695.832 | 4.40E-04 | 923.197  | 0.00377  |
| 651.9325 | 0.00221 | 677.45 | 1.86E-07 | 677.99 | 0.00401 | 673.572 | 6.02E-04 | 696.088 | 4.73E-04 | 923.5605 | 0.00355  |
| 652.06   | 0.00216 | 677.6  | 1.76E-07 | 678.12 | 0.00405 | 673.736 | 5.95E-04 | 696.344 | 5.07E-04 | 923.924  | 0.00335  |
| 652.1875 | 0.00211 | 677.75 | 1.66E-07 | 678.25 | 0.00409 | 673.9   | 5.89E-04 | 696.6   | 5.44E-04 | 924.2875 | 0.00315  |
| 652.315  | 0.00206 | 677.9  | 1.57E-07 | 678.38 | 0.00413 | 674.064 | 5.82E-04 | 696.856 | 5.84E-04 | 924.651  | 0.00297  |
| 652.4425 | 0.00201 | 678.05 | 1.49E-07 | 678.51 | 0.00417 | 674.228 | 5.76E-04 | 697.112 | 6.25E-04 | 925.0145 | 0.00279  |
| 652.57   | 0.00196 | 678.2  | 1.41E-07 | 678.64 | 0.0042  | 674.392 | 5.69E-04 | 697.368 | 6.70E-04 | 925.378  | 0.00263  |
| 652.6975 | 0.00191 | 678.35 | 1.34E-07 | 678.77 | 0.00424 | 674.556 | 5.63E-04 | 697.624 | 7.17E-04 | 925.7415 | 0.00247  |
| 652.825  | 0.00186 | 678.5  | 1.27E-07 | 678.9  | 0.00428 | 674.72  | 5.56E-04 | 697.88  | 7.67E-04 | 926.105  | 0.00233  |
| 652.9525 | 0.00182 | 678.65 | 1.20E-07 | 679.03 | 0.00432 | 674.884 | 5.50E-04 | 698.136 | 8.20E-04 | 926.4685 | 0.00219  |
| 653.08   | 0.00177 | 678.8  | 1.14E-07 | 679.16 | 0.00437 | 675.048 | 5.43E-04 | 698.392 | 8.76E-04 | 926.832  | 0.00206  |
| 653.2075 | 0.00173 | 678.95 | 1.08E-07 | 679.29 | 0.00441 | 675.212 | 5.36E-04 | 698.648 | 9.35E-04 | 927.1955 | 0.00194  |
| 653.335  | 0.00169 | 679.1  | 1.02E-07 | 679.42 | 0.00445 | 675.376 | 5.30E-04 | 698.904 | 9.98E-04 | 927.559  | 0.00182  |
| 653.4625 | 0.00164 | 679.25 | 9.72E-08 | 679.55 | 0.00449 | 675.54  | 5.23E-04 | 699.16  | 0.00106  | 927.9225 | 0.00171  |
| 653.59   | 0.0016  | 679.4  | 9.24E-08 | 679.68 | 0.00453 | 675.704 | 5.16E-04 | 699.416 | 0.00113  | 928.286  | 0.00161  |
| 653.7175 | 0.00156 | 679.55 | 8.79E-08 | 679.81 | 0.00457 | 675.868 | 5.10E-04 | 699.672 | 0.00121  | 928.6495 | 0.00151  |
| 653.845  | 0.00152 | 679.7  | 8.38E-08 | 679.94 | 0.00462 | 676.032 | 5.03E-04 | 699.928 | 0.00129  | 929.013  | 0.00142  |
| 653.9725 | 0.00148 | 679.85 | 7.99E-08 | 680.07 | 0.00466 | 676.196 | 4.96E-04 | 700.184 | 0.00137  | 929.3765 | 0.00134  |
| 654.1    | 0.00144 | 680    | 7.63E-08 | 680.2  | 0.0047  | 676.36  | 4.90E-04 | 700.44  | 0.00145  | 929.74   | 0.00125  |
| 654.2275 | 0.0014  | 680.15 | 7.30E-08 | 680.33 | 0.00474 | 676.524 | 4.83E-04 | 700.696 | 0.00154  | 930.1035 | 0.00118  |
| 654.355  | 0.00137 | 680.3  | 7.00E-08 | 680.46 | 0.00479 | 676.688 | 4.76E-04 | 700.952 | 0.00164  | 930.467  | 0.0011   |
| 654.4825 | 0.00133 | 680.45 | 6.72E-08 | 680.59 | 0.00483 | 676.852 | 4.70E-04 | 701.208 | 0.00174  | 930.8305 | 0.00104  |
| 654.61   | 0.00129 | 680.6  | 6.47E-08 | 680.72 | 0.00488 | 677.016 | 4.63E-04 | 701.464 | 0.00184  | 931.194  | 9.71E-04 |
| 654.7375 | 0.00126 | 680.75 | 6.25E-08 | 680.85 | 0.00492 | 677.18  | 4.56E-04 | 701.72  | 0.00195  | 931.5575 | 9.10E-04 |
| 654.865  | 0.00123 | 680.9  | 6.04E-08 | 680.98 | 0.00496 | 677.344 | 4.50E-04 | 701.976 | 0.00207  | 931.921  | 8.53E-04 |
| 654.9925 | 0.00119 | 681.05 | 5.87E-08 | 681.11 | 0.00501 | 677.508 | 4.43E-04 | 702.232 | 0.00219  | 932.2845 | 7.98E-04 |
| 655.12   | 0.00116 | 681.2  | 5.71E-08 | 681.24 | 0.00505 | 677.672 | 4.37E-04 | 702.488 | 0.00231  | 932.648  | 7.47E-04 |
| 655.2475 | 0.00113 | 681.35 | 5.58E-08 | 681.37 | 0.0051  | 677.836 | 4.30E-04 | 702.744 | 0.00245  | 933.0115 | 6.99E-04 |
| 655.375  | 0.0011  | 681.5  | 5.47E-08 | 681.5  | 0.00514 | 678     | 4.24E-04 | 703     | 0.00258  | 933.375  | 6.53E-04 |

|          |          |        |          |        |         |         |          |         |         |          |          |
|----------|----------|--------|----------|--------|---------|---------|----------|---------|---------|----------|----------|
| 655.5025 | 0.00107  | 681.65 | 5.38E-08 | 681.63 | 0.00519 | 678.164 | 4.17E-04 | 703.256 | 0.00273 | 933.7385 | 6.10E-04 |
| 655.63   | 0.00104  | 681.8  | 5.32E-08 | 681.76 | 0.00523 | 678.328 | 4.11E-04 | 703.512 | 0.00288 | 934.102  | 5.69E-04 |
| 655.7575 | 0.00101  | 681.95 | 5.27E-08 | 681.89 | 0.00528 | 678.492 | 4.05E-04 | 703.768 | 0.00303 | 934.4655 | 5.31E-04 |
| 655.885  | 9.79E-04 | 682.1  | 5.25E-08 | 682.02 | 0.00532 | 678.656 | 3.98E-04 | 704.024 | 0.0032  | 934.829  | 4.95E-04 |
| 656.0125 | 9.52E-04 | 682.25 | 5.25E-08 | 682.15 | 0.00537 | 678.82  | 3.92E-04 | 704.28  | 0.00336 | 935.1925 | 4.61E-04 |
| 656.14   | 9.24E-04 | 682.4  | 5.27E-08 | 682.28 | 0.00542 | 678.984 | 3.86E-04 | 704.536 | 0.00354 | 935.556  | 4.29E-04 |
| 656.2675 | 8.98E-04 | 682.55 | 5.32E-08 | 682.41 | 0.00546 | 679.148 | 3.80E-04 | 704.792 | 0.00372 | 935.9195 | 3.99E-04 |
| 656.395  | 8.72E-04 | 682.7  | 5.38E-08 | 682.54 | 0.00551 | 679.312 | 3.74E-04 | 705.048 | 0.00391 | 936.283  | 3.71E-04 |
| 656.5225 | 8.47E-04 | 682.85 | 5.47E-08 | 682.67 | 0.00555 | 679.476 | 3.68E-04 | 705.304 | 0.00411 | 936.6465 | 3.44E-04 |
| 656.65   | 8.22E-04 | 683    | 5.59E-08 | 682.8  | 0.0056  | 679.64  | 3.62E-04 | 705.56  | 0.00431 | 937.01   | 3.19E-04 |
| 656.7775 | 7.98E-04 | 683.15 | 5.72E-08 | 682.93 | 0.00565 | 679.804 | 3.56E-04 | 705.816 | 0.00452 | 937.3735 | 2.96E-04 |
| 656.905  | 7.75E-04 | 683.3  | 5.88E-08 | 683.06 | 0.00569 | 679.968 | 3.51E-04 | 706.072 | 0.00474 | 937.737  | 2.74E-04 |
| 657.0325 | 7.52E-04 | 683.45 | 6.07E-08 | 683.19 | 0.00574 | 680.132 | 3.45E-04 | 706.328 | 0.00497 | 938.1005 | 2.53E-04 |
| 657.16   | 7.29E-04 | 683.6  | 6.28E-08 | 683.32 | 0.00579 | 680.296 | 3.39E-04 | 706.584 | 0.0052  | 938.464  | 2.34E-04 |
| 657.2875 | 7.08E-04 | 683.75 | 6.52E-08 | 683.45 | 0.00583 | 680.46  | 3.34E-04 | 706.84  | 0.00544 | 938.8275 | 2.16E-04 |
| 657.415  | 6.86E-04 | 683.9  | 6.78E-08 | 683.58 | 0.00588 | 680.624 | 3.29E-04 | 707.096 | 0.00569 | 939.191  | 1.99E-04 |
| 657.5425 | 6.66E-04 | 684.05 | 7.08E-08 | 683.71 | 0.00593 | 680.788 | 3.23E-04 | 707.352 | 0.00595 | 939.5545 | 1.84E-04 |
| 657.67   | 6.45E-04 | 684.2  | 7.40E-08 | 683.84 | 0.00597 | 680.952 | 3.18E-04 | 707.608 | 0.00621 | 939.918  | 1.69E-04 |
| 657.7975 | 6.26E-04 | 684.35 | 7.75E-08 | 683.97 | 0.00602 | 681.116 | 3.13E-04 | 707.864 | 0.00648 | 940.2815 | 1.55E-04 |
| 657.925  | 6.07E-04 | 684.5  | 8.14E-08 | 684.1  | 0.00607 | 681.28  | 3.08E-04 | 708.12  | 0.00676 | 940.645  | 1.43E-04 |
| 658.0525 | 5.88E-04 | 684.65 | 8.55E-08 | 684.23 | 0.00611 | 681.444 | 3.03E-04 | 708.376 | 0.00705 | 941.0085 | 1.31E-04 |
| 658.18   | 5.70E-04 | 684.8  | 9.01E-08 | 684.36 | 0.00616 | 681.608 | 2.98E-04 | 708.632 | 0.00734 | 941.372  | 1.20E-04 |
| 658.3075 | 5.52E-04 | 684.95 | 9.49E-08 | 684.49 | 0.00621 | 681.772 | 2.93E-04 | 708.888 | 0.00764 | 941.7355 | 1.10E-04 |
| 658.435  | 5.35E-04 | 685.1  | 1.00E-07 | 684.62 | 0.00625 | 681.936 | 2.89E-04 | 709.144 | 0.00795 | 942.099  | 1.00E-04 |
| 658.5625 | 5.18E-04 | 685.25 | 1.06E-07 | 684.75 | 0.0063  | 682.1   | 2.84E-04 | 709.4   | 0.00827 | 942.4625 | 9.16E-05 |
| 658.69   | 5.02E-04 | 685.4  | 1.12E-07 | 684.88 | 0.00635 | 682.264 | 2.79E-04 | 709.656 | 0.00859 | 942.826  | 8.35E-05 |
| 658.8175 | 4.86E-04 | 685.55 | 1.18E-07 | 685.01 | 0.00639 | 682.428 | 2.75E-04 | 709.912 | 0.00892 | 943.1895 | 7.61E-05 |
| 658.945  | 4.70E-04 | 685.7  | 1.25E-07 | 685.14 | 0.00644 | 682.592 | 2.71E-04 | 710.168 | 0.00926 | 943.553  | 6.92E-05 |
| 659.0725 | 4.55E-04 | 685.85 | 1.33E-07 | 685.27 | 0.00649 | 682.756 | 2.66E-04 | 710.424 | 0.0096  | 943.9165 | 6.29E-05 |
| 659.2    | 4.40E-04 | 686    | 1.41E-07 | 685.4  | 0.00653 | 682.92  | 2.62E-04 | 710.68  | 0.00996 | 944.28   | 5.71E-05 |
| 659.3275 | 4.26E-04 | 686.15 | 1.49E-07 | 685.53 | 0.00658 | 683.084 | 2.58E-04 | 710.936 | 0.01031 | 944.6435 | 5.18E-05 |
| 659.455  | 4.12E-04 | 686.3  | 1.58E-07 | 685.66 | 0.00663 | 683.248 | 2.54E-04 | 711.192 | 0.01068 | 945.007  | 4.69E-05 |
| 659.5825 | 3.99E-04 | 686.45 | 1.68E-07 | 685.79 | 0.00667 | 683.412 | 2.50E-04 | 711.448 | 0.01105 | 945.3705 | 4.24E-05 |
| 659.71   | 3.86E-04 | 686.6  | 1.78E-07 | 685.92 | 0.00672 | 683.576 | 2.47E-04 | 711.704 | 0.01143 | 945.734  | 3.83E-05 |
| 659.8375 | 3.73E-04 | 686.75 | 1.89E-07 | 686.05 | 0.00676 | 683.74  | 2.43E-04 | 711.96  | 0.01181 | 946.0975 | 3.46E-05 |
| 659.965  | 3.61E-04 | 686.9  | 2.01E-07 | 686.18 | 0.00681 | 683.904 | 2.39E-04 | 712.216 | 0.0122  | 946.461  | 3.12E-05 |
| 660.0925 | 3.49E-04 | 687.05 | 2.13E-07 | 686.31 | 0.00686 | 684.068 | 2.36E-04 | 712.472 | 0.01259 | 946.8245 | 2.81E-05 |
| 660.22   | 3.37E-04 | 687.2  | 2.26E-07 | 686.44 | 0.0069  | 684.232 | 2.33E-04 | 712.728 | 0.01299 | 947.188  | 2.52E-05 |
| 660.3475 | 3.26E-04 | 687.35 | 2.40E-07 | 686.57 | 0.00695 | 684.396 | 2.29E-04 | 712.984 | 0.01339 | 947.5515 | 2.27E-05 |
| 660.475  | 3.15E-04 | 687.5  | 2.55E-07 | 686.7  | 0.00699 | 684.56  | 2.26E-04 | 713.24  | 0.0138  | 947.915  | 2.03E-05 |
| 660.6025 | 3.04E-04 | 687.65 | 2.70E-07 | 686.83 | 0.00704 | 684.724 | 2.23E-04 | 713.496 | 0.01421 | 948.2785 | 1.82E-05 |
| 660.73   | 2.94E-04 | 687.8  | 2.87E-07 | 686.96 | 0.00708 | 684.888 | 2.20E-04 | 713.752 | 0.01462 | 948.642  | 1.63E-05 |
| 660.8575 | 2.84E-04 | 687.95 | 3.04E-07 | 687.09 | 0.00712 | 685.052 | 2.17E-04 | 714.008 | 0.01504 | 949.0055 | 1.45E-05 |
| 660.985  | 2.74E-04 | 688.1  | 3.23E-07 | 687.22 | 0.00717 | 685.216 | 2.14E-04 | 714.264 | 0.01546 | 949.369  | 1.30E-05 |
| 661.1125 | 2.65E-04 | 688.25 | 3.43E-07 | 687.35 | 0.00721 | 685.38  | 2.12E-04 | 714.52  | 0.01588 | 949.7325 | 1.16E-05 |
| 661.24   | 2.56E-04 | 688.4  | 3.63E-07 | 687.48 | 0.00726 | 685.544 | 2.09E-04 | 714.776 | 0.0163  | 950.096  | 1.03E-05 |
| 661.3675 | 2.47E-04 | 688.55 | 3.85E-07 | 687.61 | 0.0073  | 685.708 | 2.07E-04 | 715.032 | 0.01673 | 950.4595 | 9.14E-06 |
| 661.495  | 2.38E-04 | 688.7  | 4.09E-07 | 687.74 | 0.00734 | 685.872 | 2.04E-04 | 715.288 | 0.01716 | 950.823  | 8.11E-06 |
| 661.6225 | 2.30E-04 | 688.85 | 4.33E-07 | 687.87 | 0.00739 | 686.036 | 2.02E-04 | 715.544 | 0.01758 | 951.1865 | 7.19E-06 |
| 661.75   | 2.22E-04 | 689    | 4.59E-07 | 688    | 0.00743 | 686.2   | 1.99E-04 | 715.8   | 0.01801 | 951.55   | 6.37E-06 |
| 661.8775 | 2.14E-04 | 689.15 | 4.87E-07 | 688.13 | 0.00747 | 686.364 | 1.97E-04 | 716.056 | 0.01844 | 951.9135 | 5.63E-06 |

|          |          |        |          |        |         |         |          |         |         |          |          |
|----------|----------|--------|----------|--------|---------|---------|----------|---------|---------|----------|----------|
| 662.005  | 2.06E-04 | 689.3  | 5.16E-07 | 688.26 | 0.00751 | 686.528 | 1.95E-04 | 716.312 | 0.01887 | 952.277  | 4.97E-06 |
| 662.1325 | 1.99E-04 | 689.45 | 5.46E-07 | 688.39 | 0.00755 | 686.692 | 1.93E-04 | 716.568 | 0.01929 | 952.6405 | 4.38E-06 |
| 662.26   | 1.92E-04 | 689.6  | 5.79E-07 | 688.52 | 0.00759 | 686.856 | 1.91E-04 | 716.824 | 0.01972 | 953.004  | 3.86E-06 |
| 662.3875 | 1.85E-04 | 689.75 | 6.13E-07 | 688.65 | 0.00764 | 687.02  | 1.89E-04 | 717.08  | 0.02014 | 953.3675 | 3.40E-06 |
| 662.515  | 1.78E-04 | 689.9  | 6.49E-07 | 688.78 | 0.00768 | 687.184 | 1.87E-04 | 717.336 | 0.02056 | 953.731  | 2.98E-06 |
| 662.6425 | 1.72E-04 | 690.05 | 6.87E-07 | 688.91 | 0.00772 | 687.348 | 1.86E-04 | 717.592 | 0.02097 | 954.0945 | 2.62E-06 |
| 662.77   | 1.65E-04 | 690.2  | 7.27E-07 | 689.04 | 0.00775 | 687.512 | 1.84E-04 | 717.848 | 0.02139 | 954.458  | 2.29E-06 |
| 662.8975 | 1.59E-04 | 690.35 | 7.69E-07 | 689.17 | 0.00779 | 687.676 | 1.83E-04 | 718.104 | 0.02179 | 954.8215 | 2.01E-06 |
| 663.025  | 1.53E-04 | 690.5  | 8.14E-07 | 689.3  | 0.00783 | 687.84  | 1.81E-04 | 718.36  | 0.0222  | 955.185  | 1.75E-06 |
| 663.1525 | 1.48E-04 | 690.65 | 8.61E-07 | 689.43 | 0.00787 | 688.004 | 1.80E-04 | 718.616 | 0.0226  | 955.5485 | 1.53E-06 |
| 663.28   | 1.42E-04 | 690.8  | 9.10E-07 | 689.56 | 0.00791 | 688.168 | 1.78E-04 | 718.872 | 0.02299 | 955.912  | 1.33E-06 |
| 663.4075 | 1.37E-04 | 690.95 | 9.62E-07 | 689.69 | 0.00795 | 688.332 | 1.77E-04 | 719.128 | 0.02338 | 956.2755 | 1.16E-06 |
| 663.535  | 1.32E-04 | 691.1  | 1.02E-06 | 689.82 | 0.00798 | 688.496 | 1.76E-04 | 719.384 | 0.02376 | 956.639  | 1.01E-06 |
| 663.6625 | 1.27E-04 | 691.25 | 1.07E-06 | 689.95 | 0.00802 | 688.66  | 1.75E-04 | 719.64  | 0.02413 | 957.0025 | 8.77E-07 |
| 663.79   | 1.22E-04 | 691.4  | 1.14E-06 | 690.08 | 0.00805 | 688.824 | 1.73E-04 | 719.896 | 0.0245  | 957.366  | 7.61E-07 |
| 663.9175 | 1.18E-04 | 691.55 | 1.20E-06 | 690.21 | 0.00809 | 688.988 | 1.72E-04 | 720.152 | 0.02485 | 957.7295 | 6.59E-07 |
| 664.045  | 1.13E-04 | 691.7  | 1.27E-06 | 690.34 | 0.00812 | 689.152 | 1.72E-04 | 720.408 | 0.0252  | 958.093  | 5.70E-07 |
| 664.1725 | 1.09E-04 | 691.85 | 1.34E-06 | 690.47 | 0.00816 | 689.316 | 1.71E-04 | 720.664 | 0.02554 | 958.4565 | 4.92E-07 |
| 664.3    | 1.05E-04 | 692    | 1.41E-06 | 690.6  | 0.00819 | 689.48  | 1.70E-04 | 720.92  | 0.02587 | 958.82   | 4.24E-07 |
| 664.4275 | 1.01E-04 | 692.15 | 1.49E-06 | 690.73 | 0.00823 | 689.644 | 1.69E-04 | 721.176 | 0.0262  | 959.1835 | 3.66E-07 |
| 664.555  | 9.67E-05 | 692.3  | 1.57E-06 | 690.86 | 0.00826 | 689.808 | 1.68E-04 | 721.432 | 0.02651 | 959.547  | 3.14E-07 |
| 664.6825 | 9.30E-05 | 692.45 | 1.66E-06 | 690.99 | 0.00829 | 689.972 | 1.68E-04 | 721.688 | 0.02681 | 959.9105 | 2.70E-07 |
| 664.81   | 8.94E-05 | 692.6  | 1.75E-06 | 691.12 | 0.00832 | 690.136 | 1.67E-04 | 721.944 | 0.0271  | 960.274  | 2.32E-07 |
| 664.9375 | 8.59E-05 | 692.75 | 1.84E-06 | 691.25 | 0.00835 | 690.3   | 1.66E-04 | 722.2   | 0.02738 | 960.6375 | 1.99E-07 |
| 665.065  | 8.25E-05 | 692.9  | 1.94E-06 | 691.38 | 0.00838 | 690.464 | 1.66E-04 | 722.456 | 0.02765 | 961.001  | 1.70E-07 |
| 665.1925 | 7.93E-05 | 693.05 | 2.05E-06 | 691.51 | 0.00841 | 690.628 | 1.65E-04 | 722.712 | 0.0279  | 961.3645 | 1.45E-07 |
| 665.32   | 7.62E-05 | 693.2  | 2.16E-06 | 691.64 | 0.00844 | 690.792 | 1.65E-04 | 722.968 | 0.02815 | 961.728  | 1.24E-07 |
| 665.4475 | 7.31E-05 | 693.35 | 2.27E-06 | 691.77 | 0.00847 | 690.956 | 1.65E-04 | 723.224 | 0.02838 | 962.0915 | 1.06E-07 |
| 665.575  | 7.02E-05 | 693.5  | 2.39E-06 | 691.9  | 0.00849 | 691.12  | 1.64E-04 | 723.48  | 0.0286  | 962.455  | 9.00E-08 |
| 665.7025 | 6.74E-05 | 693.65 | 2.52E-06 | 692.03 | 0.00852 | 691.284 | 1.64E-04 | 723.736 | 0.02881 | 962.8185 | 7.65E-08 |
| 665.83   | 6.47E-05 | 693.8  | 2.65E-06 | 692.16 | 0.00855 | 691.448 | 1.64E-04 | 723.992 | 0.029   | 963.182  | 6.50E-08 |
| 665.9575 | 6.21E-05 | 693.95 | 2.79E-06 | 692.29 | 0.00857 | 691.612 | 1.64E-04 | 724.248 | 0.02918 | 963.5455 | 5.51E-08 |
| 666.085  | 5.96E-05 | 694.1  | 2.94E-06 | 692.42 | 0.0086  | 691.776 | 1.64E-04 | 724.504 | 0.02935 | 963.909  | 4.67E-08 |
| 666.2125 | 5.72E-05 | 694.25 | 3.09E-06 | 692.55 | 0.00862 | 691.94  | 1.63E-04 | 724.76  | 0.0295  | 964.2725 | 3.95E-08 |
| 666.34   | 5.49E-05 | 694.4  | 3.25E-06 | 692.68 | 0.00864 | 692.104 | 1.63E-04 | 725.016 | 0.02964 | 964.636  | 3.33E-08 |
| 666.4675 | 5.26E-05 | 694.55 | 3.42E-06 | 692.81 | 0.00866 | 692.268 | 1.63E-04 | 725.272 | 0.02976 | 964.9995 | 2.81E-08 |
| 666.595  | 5.05E-05 | 694.7  | 3.60E-06 | 692.94 | 0.00869 | 692.432 | 1.63E-04 | 725.528 | 0.02988 | 965.363  | 2.37E-08 |
| 666.7225 | 4.84E-05 | 694.85 | 3.78E-06 | 693.07 | 0.00871 | 692.596 | 1.63E-04 | 725.784 | 0.02997 | 965.7265 | 1.99E-08 |
| 666.85   | 4.64E-05 | 695    | 3.97E-06 | 693.2  | 0.00873 | 692.76  | 1.64E-04 | 726.04  | 0.03006 | 966.09   | 1.67E-08 |
| 666.9775 | 4.45E-05 | 695.15 | 4.17E-06 | 693.33 | 0.00874 | 692.924 | 1.64E-04 | 726.296 | 0.03013 | 966.4535 | 1.40E-08 |
| 667.105  | 4.26E-05 | 695.3  | 4.38E-06 | 693.46 | 0.00876 | 693.088 | 1.64E-04 | 726.552 | 0.03018 | 966.817  | 1.18E-08 |
| 667.2325 | 4.09E-05 | 695.45 | 4.60E-06 | 693.59 | 0.00878 | 693.252 | 1.64E-04 | 726.808 | 0.03022 | 967.1805 | 9.85E-09 |
| 667.36   | 3.91E-05 | 695.6  | 4.83E-06 | 693.72 | 0.0088  | 693.416 | 1.64E-04 | 727.064 | 0.03025 | 967.544  | 8.23E-09 |
| 667.4875 | 3.75E-05 | 695.75 | 5.07E-06 | 693.85 | 0.00881 | 693.58  | 1.65E-04 | 727.32  | 0.03026 | 967.9075 | 6.87E-09 |
| 667.615  | 3.59E-05 | 695.9  | 5.32E-06 | 693.98 | 0.00883 | 693.744 | 1.65E-04 | 727.576 | 0.03026 | 968.271  | 5.72E-09 |
| 667.7425 | 3.44E-05 | 696.05 | 5.59E-06 | 694.11 | 0.00884 | 693.908 | 1.65E-04 | 727.832 | 0.03025 | 968.6345 | 4.76E-09 |
| 667.87   | 3.29E-05 | 696.2  | 5.86E-06 | 694.24 | 0.00885 | 694.072 | 1.66E-04 | 728.088 | 0.03022 | 968.998  | 3.96E-09 |
| 667.9975 | 3.15E-05 | 696.35 | 6.15E-06 | 694.37 | 0.00886 | 694.236 | 1.66E-04 | 728.344 | 0.03018 | 969.3615 | 3.29E-09 |
| 668.125  | 3.02E-05 | 696.5  | 6.44E-06 | 694.5  | 0.00888 | 694.4   | 1.67E-04 | 728.6   | 0.03012 | 969.725  | 2.73E-09 |
| 668.2525 | 2.89E-05 | 696.65 | 6.75E-06 | 694.63 | 0.00889 | 694.564 | 1.67E-04 | 728.856 | 0.03005 | 970.0885 | 2.26E-09 |
| 668.38   | 2.77E-05 | 696.8  | 7.08E-06 | 694.76 | 0.00889 | 694.728 | 1.68E-04 | 729.112 | 0.02997 | 970.452  | 1.87E-09 |

|          |          |        |          |        |         |         |          |         |         |          |          |
|----------|----------|--------|----------|--------|---------|---------|----------|---------|---------|----------|----------|
| 668.5075 | 2.65E-05 | 696.95 | 7.42E-06 | 694.89 | 0.0089  | 694.892 | 1.68E-04 | 729.368 | 0.02987 | 970.8155 | 1.54E-09 |
| 668.635  | 2.53E-05 | 697.1  | 7.77E-06 | 695.02 | 0.00891 | 695.056 | 1.69E-04 | 729.624 | 0.02976 | 971.179  | 1.27E-09 |
| 668.7625 | 2.42E-05 | 697.25 | 8.14E-06 | 695.15 | 0.00892 | 695.22  | 1.70E-04 | 729.88  | 0.02964 | 971.5425 | 1.05E-09 |
| 668.89   | 2.32E-05 | 697.4  | 8.52E-06 | 695.28 | 0.00892 | 695.384 | 1.70E-04 | 730.136 | 0.02951 | 971.906  | 8.62E-10 |
| 669.0175 | 2.21E-05 | 697.55 | 8.92E-06 | 695.41 | 0.00893 | 695.548 | 1.71E-04 | 730.392 | 0.02936 | 972.2695 | 7.08E-10 |
| 669.145  | 2.12E-05 | 697.7  | 9.34E-06 | 695.54 | 0.00893 | 695.712 | 1.72E-04 | 730.648 | 0.0292  | 972.633  | 5.81E-10 |
| 669.2725 | 2.02E-05 | 697.85 | 9.77E-06 | 695.67 | 0.00893 | 695.876 | 1.73E-04 | 730.904 | 0.02903 | 972.9965 | 4.76E-10 |
| 669.4    | 1.94E-05 | 698    | 1.02E-05 | 695.8  | 0.00893 | 696.04  | 1.74E-04 | 731.16  | 0.02885 | 973.36   | 3.89E-10 |
| 669.5275 | 1.85E-05 | 698.15 | 1.07E-05 | 695.93 | 0.00893 | 696.204 | 1.75E-04 | 731.416 | 0.02866 | 973.7235 | 3.18E-10 |
| 669.655  | 1.77E-05 | 698.3  | 1.12E-05 | 696.06 | 0.00893 | 696.368 | 1.76E-04 | 731.672 | 0.02846 | 974.087  | 2.60E-10 |
| 669.7825 | 1.69E-05 | 698.45 | 1.17E-05 | 696.19 | 0.00893 | 696.532 | 1.77E-04 | 731.928 | 0.02824 | 974.4505 | 2.12E-10 |
| 669.91   | 1.61E-05 | 698.6  | 1.22E-05 | 696.32 | 0.00893 | 696.696 | 1.78E-04 | 732.184 | 0.02802 | 974.814  | 1.72E-10 |
| 670.0375 | 1.54E-05 | 698.75 | 1.28E-05 | 696.45 | 0.00893 | 696.86  | 1.79E-04 | 732.44  | 0.02779 | 975.1775 | 1.40E-10 |
| 670.165  | 1.47E-05 | 698.9  | 1.33E-05 | 696.58 | 0.00892 | 697.024 | 1.80E-04 | 732.696 | 0.02754 | 975.541  | 1.14E-10 |
| 670.2925 | 1.41E-05 | 699.05 | 1.39E-05 | 696.71 | 0.00892 | 697.188 | 1.81E-04 | 732.952 | 0.02729 | 975.9045 | 9.22E-11 |
| 670.42   | 1.34E-05 | 699.2  | 1.45E-05 | 696.84 | 0.00891 | 697.352 | 1.82E-04 | 733.208 | 0.02703 | 976.268  | 7.46E-11 |
| 670.5475 | 1.28E-05 | 699.35 | 1.52E-05 | 696.97 | 0.0089  | 697.516 | 1.84E-04 | 733.464 | 0.02676 | 976.6315 | 6.03E-11 |
| 670.675  | 1.23E-05 | 699.5  | 1.58E-05 | 697.1  | 0.00889 | 697.68  | 1.85E-04 | 733.72  | 0.02648 | 976.995  | 4.87E-11 |
| 670.8025 | 1.17E-05 | 699.65 | 1.65E-05 | 697.23 | 0.00888 | 697.844 | 1.86E-04 | 733.976 | 0.02619 | 977.3585 | 3.93E-11 |
| 670.93   | 1.12E-05 | 699.8  | 1.73E-05 | 697.36 | 0.00887 | 698.008 | 1.88E-04 | 734.232 | 0.0259  | 977.722  | 3.16E-11 |
| 671.0575 | 1.07E-05 | 699.95 | 1.80E-05 | 697.49 | 0.00886 | 698.172 | 1.89E-04 | 734.488 | 0.0256  | 978.0855 | 2.55E-11 |
| 671.185  | 1.02E-05 | 700.1  | 1.88E-05 | 697.62 | 0.00885 | 698.336 | 1.91E-04 | 734.744 | 0.02529 | 978.449  | 2.04E-11 |
| 671.3125 | 9.71E-06 | 700.25 | 1.96E-05 | 697.75 | 0.00884 | 698.5   | 1.92E-04 | 735     | 0.02497 | 978.8125 | 1.64E-11 |
| 671.44   | 9.27E-06 | 700.4  | 2.04E-05 | 697.88 | 0.00882 | 698.664 | 1.94E-04 | 735.256 | 0.02465 | 979.176  | 1.31E-11 |
| 671.5675 | 8.85E-06 | 700.55 | 2.13E-05 | 698.01 | 0.00881 | 698.828 | 1.96E-04 | 735.512 | 0.02432 | 979.5395 | 1.05E-11 |
| 671.695  | 8.45E-06 | 700.7  | 2.22E-05 | 698.14 | 0.00879 | 698.992 | 1.98E-04 | 735.768 | 0.02399 | 979.903  | 8.40E-12 |
| 671.8225 | 8.07E-06 | 700.85 | 2.31E-05 | 698.27 | 0.00877 | 699.156 | 1.99E-04 | 736.024 | 0.02365 | 980.2665 | 6.70E-12 |
| 671.95   | 7.70E-06 | 701    | 2.40E-05 | 698.4  | 0.00875 | 699.32  | 2.01E-04 | 736.28  | 0.02331 | 980.63   | 5.34E-12 |
| 672.0775 | 7.35E-06 | 701.15 | 2.50E-05 | 698.53 | 0.00873 | 699.484 | 2.03E-04 | 736.536 | 0.02296 | 980.9935 | 4.25E-12 |
| 672.205  | 7.02E-06 | 701.3  | 2.60E-05 | 698.66 | 0.00871 | 699.648 | 2.05E-04 | 736.792 | 0.02261 | 981.357  | 3.38E-12 |
| 672.3325 | 6.70E-06 | 701.45 | 2.71E-05 | 698.79 | 0.00869 | 699.812 | 2.07E-04 | 737.048 | 0.02226 | 981.7205 | 2.68E-12 |
| 672.46   | 6.40E-06 | 701.6  | 2.82E-05 | 698.92 | 0.00867 | 699.976 | 2.10E-04 | 737.304 | 0.0219  | 982.084  | 2.13E-12 |
| 672.5875 | 6.11E-06 | 701.75 | 2.93E-05 | 699.05 | 0.00865 | 700.14  | 2.12E-04 | 737.56  | 0.02153 | 982.4475 | 1.68E-12 |
| 672.715  | 5.84E-06 | 701.9  | 3.05E-05 | 699.18 | 0.00862 | 700.304 | 2.14E-04 | 737.816 | 0.02117 | 982.811  | 1.33E-12 |
| 672.8425 | 5.58E-06 | 702.05 | 3.17E-05 | 699.31 | 0.0086  | 700.468 | 2.17E-04 | 738.072 | 0.0208  | 983.1745 | 1.05E-12 |
| 672.97   | 5.33E-06 | 702.2  | 3.30E-05 | 699.44 | 0.00857 | 700.632 | 2.19E-04 | 738.328 | 0.02043 | 983.538  | 8.29E-13 |
| 673.0975 | 5.09E-06 | 702.35 | 3.43E-05 | 699.57 | 0.00854 | 700.796 | 2.22E-04 | 738.584 | 0.02006 | 983.9015 | 6.52E-13 |
| 673.225  | 4.87E-06 | 702.5  | 3.56E-05 | 699.7  | 0.00852 | 700.96  | 2.25E-04 | 738.84  | 0.01969 | 984.265  | 5.13E-13 |
| 673.3525 | 4.66E-06 | 702.65 | 3.70E-05 | 699.83 | 0.00849 | 701.124 | 2.27E-04 | 739.096 | 0.01931 | 984.6285 | 4.03E-13 |
| 673.48   | 4.46E-06 | 702.8  | 3.84E-05 | 699.96 | 0.00846 | 701.288 | 2.30E-04 | 739.352 | 0.01894 | 984.992  | 3.16E-13 |
| 673.6075 | 4.27E-06 | 702.95 | 3.99E-05 | 700.09 | 0.00843 | 701.452 | 2.33E-04 | 739.608 | 0.01856 | 985.3555 | 2.48E-13 |
| 673.735  | 4.09E-06 | 703.1  | 4.14E-05 | 700.22 | 0.00839 | 701.616 | 2.36E-04 | 739.864 | 0.01819 | 985.719  | 1.94E-13 |
| 673.8625 | 3.92E-06 | 703.25 | 4.30E-05 | 700.35 | 0.00836 | 701.78  | 2.39E-04 | 740.12  | 0.01781 | 986.0825 | 1.51E-13 |
| 673.99   | 3.76E-06 | 703.4  | 4.46E-05 | 700.48 | 0.00833 | 701.944 | 2.42E-04 | 740.376 | 0.01744 | 986.446  | 1.18E-13 |
| 674.1175 | 3.61E-06 | 703.55 | 4.63E-05 | 700.61 | 0.00829 | 702.108 | 2.46E-04 | 740.632 | 0.01706 | 986.8095 | 9.20E-14 |
| 674.245  | 3.47E-06 | 703.7  | 4.80E-05 | 700.74 | 0.00826 | 702.272 | 2.49E-04 | 740.888 | 0.01669 | 987.173  | 7.16E-14 |
| 674.3725 | 3.34E-06 | 703.85 | 4.98E-05 | 700.87 | 0.00822 | 702.436 | 2.53E-04 | 741.144 | 0.01631 | 987.5365 | 5.57E-14 |
| 674.5    | 3.21E-06 | 704    | 5.16E-05 | 701    | 0.00819 | 702.6   | 2.56E-04 | 741.4   | 0.01594 | 987.9    | 4.32E-14 |
| 674.6275 | 3.09E-06 | 704.15 | 5.35E-05 | 701.13 | 0.00815 | 702.764 | 2.60E-04 | 741.656 | 0.01557 | 988.2635 | 3.35E-14 |
| 674.755  | 2.98E-06 | 704.3  | 5.55E-05 | 701.26 | 0.00811 | 702.928 | 2.64E-04 | 741.912 | 0.01521 | 988.627  | 2.59E-14 |
| 674.8825 | 2.88E-06 | 704.45 | 5.75E-05 | 701.39 | 0.00807 | 703.092 | 2.68E-04 | 742.168 | 0.01484 | 988.9905 | 2.00E-14 |

|          |          |        |          |        |         |         |          |         |         |           |          |
|----------|----------|--------|----------|--------|---------|---------|----------|---------|---------|-----------|----------|
| 675.01   | 2.78E-06 | 704.6  | 5.95E-05 | 701.52 | 0.00803 | 703.256 | 2.72E-04 | 742.424 | 0.01448 | 989.354   | 1.55E-14 |
| 675.1375 | 2.70E-06 | 704.75 | 6.17E-05 | 701.65 | 0.00799 | 703.42  | 2.76E-04 | 742.68  | 0.01412 | 989.7175  | 1.19E-14 |
| 675.265  | 2.62E-06 | 704.9  | 6.38E-05 | 701.78 | 0.00795 | 703.584 | 2.80E-04 | 742.936 | 0.01376 | 990.081   | 9.18E-15 |
| 675.3925 | 2.54E-06 | 705.05 | 6.61E-05 | 701.91 | 0.00791 | 703.748 | 2.85E-04 | 743.192 | 0.0134  | 990.4445  | 7.06E-15 |
| 675.52   | 2.47E-06 | 705.2  | 6.84E-05 | 702.04 | 0.00786 | 703.912 | 2.89E-04 | 743.448 | 0.01305 | 990.808   | 5.42E-15 |
| 675.6475 | 2.41E-06 | 705.35 | 7.08E-05 | 702.17 | 0.00782 | 704.076 | 2.94E-04 | 743.704 | 0.0127  | 991.1715  | 4.16E-15 |
| 675.775  | 2.35E-06 | 705.5  | 7.32E-05 | 702.3  | 0.00777 | 704.24  | 2.99E-04 | 743.96  | 0.01236 | 991.535   | 3.19E-15 |
| 675.9025 | 2.30E-06 | 705.65 | 7.57E-05 | 702.43 | 0.00773 | 704.404 | 3.04E-04 | 744.216 | 0.01202 | 991.8985  | 2.44E-15 |
| 676.03   | 2.26E-06 | 705.8  | 7.83E-05 | 702.56 | 0.00768 | 704.568 | 3.09E-04 | 744.472 | 0.01168 | 992.262   | 1.86E-15 |
| 676.1575 | 2.22E-06 | 705.95 | 8.09E-05 | 702.69 | 0.00764 | 704.732 | 3.14E-04 | 744.728 | 0.01135 | 992.6255  | 1.42E-15 |
| 676.285  | 2.18E-06 | 706.1  | 8.36E-05 | 702.82 | 0.00759 | 704.896 | 3.19E-04 | 744.984 | 0.01102 | 992.989   | 1.08E-15 |
| 676.4125 | 2.15E-06 | 706.25 | 8.64E-05 | 702.95 | 0.00754 | 705.06  | 3.25E-04 | 745.24  | 0.0107  | 993.3525  | 8.23E-16 |
| 676.54   | 2.13E-06 | 706.4  | 8.93E-05 | 703.08 | 0.00749 | 705.224 | 3.30E-04 | 745.496 | 0.01038 | 993.716   | 6.26E-16 |
| 676.6675 | 2.11E-06 | 706.55 | 9.22E-05 | 703.21 | 0.00744 | 705.388 | 3.36E-04 | 745.752 | 0.01007 | 994.0795  | 4.75E-16 |
| 676.795  | 2.10E-06 | 706.7  | 9.52E-05 | 703.34 | 0.0074  | 705.552 | 3.42E-04 | 746.008 | 0.00976 | 994.443   | 3.60E-16 |
| 676.9225 | 2.09E-06 | 706.85 | 9.83E-05 | 703.47 | 0.00735 | 705.716 | 3.48E-04 | 746.264 | 0.00945 | 994.8065  | 2.72E-16 |
| 677.05   | 2.09E-06 | 707    | 1.01E-04 | 703.6  | 0.00729 | 705.88  | 3.54E-04 | 746.52  | 0.00915 | 995.17    | 2.06E-16 |
| 677.1775 | 2.09E-06 | 707.15 | 1.05E-04 | 703.73 | 0.00724 | 706.044 | 3.60E-04 | 746.776 | 0.00886 | 995.5335  | 1.55E-16 |
| 677.305  | 2.09E-06 | 707.3  | 1.08E-04 | 703.86 | 0.00719 | 706.208 | 3.66E-04 | 747.032 | 0.00857 | 995.897   | 1.17E-16 |
| 677.4325 | 2.10E-06 | 707.45 | 1.11E-04 | 703.99 | 0.00714 | 706.372 | 3.73E-04 | 747.288 | 0.00829 | 996.2605  | 8.82E-17 |
| 677.56   | 2.12E-06 | 707.6  | 1.15E-04 | 704.12 | 0.00709 | 706.536 | 3.80E-04 | 747.544 | 0.00801 | 996.624   | 6.63E-17 |
| 677.6875 | 2.14E-06 | 707.75 | 1.18E-04 | 704.25 | 0.00703 | 706.7   | 3.86E-04 | 747.8   | 0.00774 | 996.9875  | 4.98E-17 |
| 677.815  | 2.16E-06 | 707.9  | 1.22E-04 | 704.38 | 0.00698 | 706.864 | 3.93E-04 | 748.056 | 0.00747 | 997.351   | 3.74E-17 |
| 677.9425 | 2.19E-06 | 708.05 | 1.26E-04 | 704.51 | 0.00693 | 707.028 | 4.00E-04 | 748.312 | 0.00721 | 997.7145  | 2.80E-17 |
| 678.07   | 2.22E-06 | 708.2  | 1.30E-04 | 704.64 | 0.00687 | 707.192 | 4.08E-04 | 748.568 | 0.00696 | 998.078   | 2.09E-17 |
| 678.1975 | 2.26E-06 | 708.35 | 1.33E-04 | 704.77 | 0.00682 | 707.356 | 4.15E-04 | 748.824 | 0.00671 | 998.4415  | 1.56E-17 |
| 678.325  | 2.31E-06 | 708.5  | 1.37E-04 | 704.9  | 0.00676 | 707.52  | 4.23E-04 | 749.08  | 0.00647 | 998.805   | 1.17E-17 |
| 678.4525 | 2.35E-06 | 708.65 | 1.41E-04 | 705.03 | 0.00671 | 707.684 | 4.30E-04 | 749.336 | 0.00623 | 999.1685  | 8.69E-18 |
| 678.58   | 2.41E-06 | 708.8  | 1.46E-04 | 705.16 | 0.00665 | 707.848 | 4.38E-04 | 749.592 | 0.006   | 999.532   | 6.46E-18 |
| 678.7075 | 2.46E-06 | 708.95 | 1.50E-04 | 705.29 | 0.0066  | 708.012 | 4.46E-04 | 749.848 | 0.00577 | 999.8955  | 4.80E-18 |
| 678.835  | 2.52E-06 | 709.1  | 1.54E-04 | 705.42 | 0.00654 | 708.176 | 4.54E-04 | 750.104 | 0.00555 | 1000.259  | 3.56E-18 |
| 678.9625 | 2.59E-06 | 709.25 | 1.59E-04 | 705.55 | 0.00649 | 708.34  | 4.63E-04 | 750.36  | 0.00533 | 1000.6225 | 2.64E-18 |
| 679.09   | 2.66E-06 | 709.4  | 1.63E-04 | 705.68 | 0.00643 | 708.504 | 4.71E-04 | 750.616 | 0.00513 | 1000.986  | 1.95E-18 |
| 679.2175 | 2.74E-06 | 709.55 | 1.68E-04 | 705.81 | 0.00637 | 708.668 | 4.80E-04 | 750.872 | 0.00492 | 1001.3495 | 1.44E-18 |
| 679.345  | 2.82E-06 | 709.7  | 1.72E-04 | 705.94 | 0.00632 | 708.832 | 4.88E-04 | 751.128 | 0.00472 | 1001.713  | 1.07E-18 |
| 679.4725 | 2.90E-06 | 709.85 | 1.77E-04 | 706.07 | 0.00626 | 708.996 | 4.97E-04 | 751.384 | 0.00453 | 1002.0765 | 7.86E-19 |
| 679.6    | 3.00E-06 | 710    | 1.82E-04 | 706.2  | 0.0062  | 709.16  | 5.06E-04 | 751.64  | 0.00435 | 1002.44   | 5.79E-19 |
| 679.7275 | 3.09E-06 | 710.15 | 1.87E-04 | 706.33 | 0.00614 | 709.324 | 5.15E-04 | 751.896 | 0.00417 | 1002.8035 | 4.25E-19 |
| 679.855  | 3.19E-06 | 710.3  | 1.92E-04 | 706.46 | 0.00609 | 709.488 | 5.25E-04 | 752.152 | 0.00399 | 1003.167  | 3.12E-19 |
| 679.9825 | 3.30E-06 | 710.45 | 1.97E-04 | 706.59 | 0.00603 | 709.652 | 5.34E-04 | 752.408 | 0.00382 | 1003.5305 | 2.29E-19 |
| 680.11   | 3.41E-06 | 710.6  | 2.02E-04 | 706.72 | 0.00597 | 709.816 | 5.44E-04 | 752.664 | 0.00366 | 1003.894  | 1.68E-19 |
| 680.2375 | 3.53E-06 | 710.75 | 2.08E-04 | 706.85 | 0.00591 | 709.98  | 5.54E-04 | 752.92  | 0.0035  | 1004.2575 | 1.23E-19 |
| 680.365  | 3.65E-06 | 710.9  | 2.13E-04 | 706.98 | 0.00586 | 710.144 | 5.64E-04 | 753.176 | 0.00334 | 1004.621  | 8.96E-20 |
| 680.4925 | 3.78E-06 | 711.05 | 2.19E-04 | 707.11 | 0.0058  | 710.308 | 5.74E-04 | 753.432 | 0.00319 | 1004.9845 | 6.54E-20 |
| 680.62   | 3.92E-06 | 711.2  | 2.24E-04 | 707.24 | 0.00574 | 710.472 | 5.84E-04 | 753.688 | 0.00305 | 1005.348  | 4.76E-20 |
| 680.7475 | 4.06E-06 | 711.35 | 2.30E-04 | 707.37 | 0.00568 | 710.636 | 5.94E-04 | 753.944 | 0.00291 | 1005.7115 | 3.46E-20 |
| 680.875  | 4.21E-06 | 711.5  | 2.36E-04 | 707.5  | 0.00563 | 710.8   | 6.05E-04 | 754.2   | 0.00278 | 1006.075  | 2.52E-20 |
| 681.0025 | 4.36E-06 | 711.65 | 2.42E-04 | 707.63 | 0.00557 | 710.964 | 6.15E-04 | 754.456 | 0.00265 | 1006.4385 | 1.83E-20 |
| 681.13   | 4.52E-06 | 711.8  | 2.48E-04 | 707.76 | 0.00551 | 711.128 | 6.26E-04 | 754.712 | 0.00253 | 1006.802  | 1.32E-20 |
| 681.2575 | 4.69E-06 | 711.95 | 2.54E-04 | 707.89 | 0.00545 | 711.292 | 6.37E-04 | 754.968 | 0.00241 | 1007.1655 | 9.57E-21 |
| 681.385  | 4.86E-06 | 712.1  | 2.60E-04 | 708.02 | 0.0054  | 711.456 | 6.48E-04 | 755.224 | 0.00229 | 1007.529  | 6.92E-21 |

|          |          |        |          |        |         |         |          |         |          |           |          |
|----------|----------|--------|----------|--------|---------|---------|----------|---------|----------|-----------|----------|
| 681.5125 | 5.04E-06 | 712.25 | 2.66E-04 | 708.15 | 0.00534 | 711.62  | 6.60E-04 | 755.48  | 0.00218  | 1007.8925 | 4.99E-21 |
| 681.64   | 5.23E-06 | 712.4  | 2.72E-04 | 708.28 | 0.00528 | 711.784 | 6.71E-04 | 755.736 | 0.00207  | 1008.256  | 3.60E-21 |
| 681.7675 | 5.43E-06 | 712.55 | 2.79E-04 | 708.41 | 0.00523 | 711.948 | 6.82E-04 | 755.992 | 0.00197  | 1008.6195 | 2.59E-21 |
| 681.895  | 5.63E-06 | 712.7  | 2.85E-04 | 708.54 | 0.00517 | 712.112 | 6.94E-04 | 756.248 | 0.00187  | 1008.983  | 1.86E-21 |
| 682.0225 | 5.84E-06 | 712.85 | 2.92E-04 | 708.67 | 0.00511 | 712.276 | 7.06E-04 | 756.504 | 0.00178  | 1009.3465 | 1.34E-21 |
| 682.15   | 6.06E-06 | 713    | 2.99E-04 | 708.8  | 0.00506 | 712.44  | 7.18E-04 | 756.76  | 0.00169  | 1009.71   | 9.59E-22 |
| 682.2775 | 6.28E-06 | 713.15 | 3.05E-04 | 708.93 | 0.005   | 712.604 | 7.30E-04 | 757.016 | 0.0016   | 1010.0735 | 6.86E-22 |
| 682.405  | 6.52E-06 | 713.3  | 3.12E-04 | 709.06 | 0.00495 | 712.768 | 7.42E-04 | 757.272 | 0.00152  | 1010.437  | 4.91E-22 |
| 682.5325 | 6.76E-06 | 713.45 | 3.19E-04 | 709.19 | 0.00489 | 712.932 | 7.54E-04 | 757.528 | 0.00144  | 1010.8005 | 3.51E-22 |
| 682.66   | 7.01E-06 | 713.6  | 3.26E-04 | 709.32 | 0.00484 | 713.096 | 7.67E-04 | 757.784 | 0.00137  | 1011.164  | 2.50E-22 |
| 682.7875 | 7.27E-06 | 713.75 | 3.33E-04 | 709.45 | 0.00478 | 713.26  | 7.79E-04 | 758.04  | 0.00129  | 1011.5275 | 1.78E-22 |
| 682.915  | 7.54E-06 | 713.9  | 3.40E-04 | 709.58 | 0.00473 | 713.424 | 7.92E-04 | 758.296 | 0.00123  | 1011.891  | 1.27E-22 |
| 683.0425 | 7.82E-06 | 714.05 | 3.48E-04 | 709.71 | 0.00467 | 713.588 | 8.04E-04 | 758.552 | 0.00116  | 1012.2545 | 9.00E-23 |
| 683.17   | 8.11E-06 | 714.2  | 3.55E-04 | 709.84 | 0.00462 | 713.752 | 8.17E-04 | 758.808 | 0.0011   | 1012.618  | 6.38E-23 |
| 683.2975 | 8.41E-06 | 714.35 | 3.62E-04 | 709.97 | 0.00457 | 713.916 | 8.30E-04 | 759.064 | 0.00104  | 1012.9815 | 4.52E-23 |
| 683.425  | 8.72E-06 | 714.5  | 3.70E-04 | 710.1  | 0.00451 | 714.08  | 8.43E-04 | 759.32  | 9.81E-04 | 1013.345  | 3.20E-23 |
| 683.5525 | 9.04E-06 | 714.65 | 3.77E-04 | 710.23 | 0.00446 | 714.244 | 8.56E-04 | 759.576 | 9.27E-04 | 1013.7085 | 2.26E-23 |
| 683.68   | 9.37E-06 | 714.8  | 3.85E-04 | 710.36 | 0.00441 | 714.408 | 8.70E-04 | 759.832 | 8.76E-04 | 1014.072  | 1.60E-23 |
| 683.8075 | 9.71E-06 | 714.95 | 3.93E-04 | 710.49 | 0.00436 | 714.572 | 8.83E-04 | 760.088 | 8.27E-04 | 1014.4355 | 1.12E-23 |
| 683.935  | 1.01E-05 | 715.1  | 4.00E-04 | 710.62 | 0.0043  | 714.736 | 8.96E-04 | 760.344 | 7.80E-04 | 1014.799  | 7.92E-24 |
| 684.0625 | 1.04E-05 | 715.25 | 4.08E-04 | 710.75 | 0.00425 | 714.9   | 9.10E-04 | 760.6   | 7.37E-04 | 1015.1625 | 5.56E-24 |
| 684.19   | 1.08E-05 | 715.4  | 4.16E-04 | 710.88 | 0.0042  | 715.064 | 9.23E-04 | 760.856 | 6.95E-04 | 1015.526  | 3.91E-24 |
| 684.3175 | 1.12E-05 | 715.55 | 4.24E-04 | 711.01 | 0.00415 | 715.228 | 9.37E-04 | 761.112 | 6.56E-04 | 1015.8895 | 2.74E-24 |
| 684.445  | 1.16E-05 | 715.7  | 4.32E-04 | 711.14 | 0.0041  | 715.392 | 9.51E-04 | 761.368 | 6.18E-04 | 1016.253  | 1.92E-24 |
| 684.5725 | 1.20E-05 | 715.85 | 4.40E-04 | 711.27 | 0.00405 | 715.556 | 9.65E-04 | 761.624 | 5.83E-04 | 1016.6165 | 1.34E-24 |
| 684.7    | 1.24E-05 | 716    | 4.48E-04 | 711.4  | 0.004   | 715.72  | 9.79E-04 | 761.88  | 5.50E-04 | 1016.98   | 9.36E-25 |
| 684.8275 | 1.29E-05 | 716.15 | 4.56E-04 | 711.53 | 0.00396 | 715.884 | 9.93E-04 | 762.136 | 5.18E-04 | 1017.3435 | 6.53E-25 |
| 684.955  | 1.33E-05 | 716.3  | 4.64E-04 | 711.66 | 0.00391 | 716.048 | 0.00101  | 762.392 | 4.88E-04 | 1017.707  | 4.55E-25 |
| 685.0825 | 1.38E-05 | 716.45 | 4.72E-04 | 711.79 | 0.00386 | 716.212 | 0.00102  | 762.648 | 4.60E-04 | 1018.0705 | 3.16E-25 |
| 685.21   | 1.43E-05 | 716.6  | 4.80E-04 | 711.92 | 0.00382 | 716.376 | 0.00103  | 762.904 | 4.34E-04 | 1018.434  | 2.20E-25 |
| 685.3375 | 1.48E-05 | 716.75 | 4.89E-04 | 712.05 | 0.00377 | 716.54  | 0.00105  | 763.16  | 4.09E-04 | 1018.7975 | 1.52E-25 |
| 685.465  | 1.53E-05 | 716.9  | 4.97E-04 | 712.18 | 0.00372 | 716.704 | 0.00106  | 763.416 | 3.86E-04 | 1019.161  | 1.06E-25 |
| 685.5925 | 1.58E-05 | 717.05 | 5.05E-04 | 712.31 | 0.00368 | 716.868 | 0.00108  | 763.672 | 3.64E-04 | 1019.5245 | 7.30E-26 |
| 685.72   | 1.64E-05 | 717.2  | 5.13E-04 | 712.44 | 0.00363 | 717.032 | 0.00109  | 763.928 | 3.43E-04 | 1019.888  | 5.04E-26 |
| 685.8475 | 1.69E-05 | 717.35 | 5.22E-04 | 712.57 | 0.00359 | 717.196 | 0.00111  | 764.184 | 3.24E-04 | 1020.2515 | 3.48E-26 |
| 685.975  | 1.75E-05 | 717.5  | 5.30E-04 | 712.7  | 0.00355 | 717.36  | 0.00112  | 764.44  | 3.05E-04 | 1020.615  | 2.40E-26 |
| 686.1025 | 1.81E-05 | 717.65 | 5.38E-04 | 712.83 | 0.00351 | 717.524 | 0.00113  | 764.696 | 2.88E-04 | 1020.9785 | 1.65E-26 |
| 686.23   | 1.87E-05 | 717.8  | 5.47E-04 | 712.96 | 0.00346 | 717.688 | 0.00115  | 764.952 | 2.72E-04 | 1021.342  | 1.13E-26 |
| 686.3575 | 1.93E-05 | 717.95 | 5.55E-04 | 713.09 | 0.00342 | 717.852 | 0.00116  | 765.208 | 2.58E-04 | 1021.7055 | 7.79E-27 |
| 686.485  | 2.00E-05 | 718.1  | 5.64E-04 | 713.22 | 0.00338 | 718.016 | 0.00118  | 765.464 | 2.44E-04 | 1022.069  | 5.34E-27 |
| 686.6125 | 2.06E-05 | 718.25 | 5.72E-04 | 713.35 | 0.00334 | 718.18  | 0.00119  | 765.72  | 2.31E-04 | 1022.4325 | 3.65E-27 |
| 686.74   | 2.13E-05 | 718.4  | 5.80E-04 | 713.48 | 0.0033  | 718.344 | 0.00121  | 765.976 | 2.19E-04 | 1022.796  | 2.50E-27 |
| 686.8675 | 2.20E-05 | 718.55 | 5.89E-04 | 713.61 | 0.00326 | 718.508 | 0.00122  | 766.232 | 2.08E-04 | 1023.1595 | 1.71E-27 |
| 686.995  | 2.27E-05 | 718.7  | 5.97E-04 | 713.74 | 0.00322 | 718.672 | 0.00123  | 766.488 | 1.97E-04 | 1023.523  | 1.16E-27 |
| 687.1225 | 2.35E-05 | 718.85 | 6.05E-04 | 713.87 | 0.00319 | 718.836 | 0.00125  | 766.744 | 1.87E-04 | 1023.8865 | 7.92E-28 |
| 687.25   | 2.42E-05 | 719    | 6.14E-04 | 714    | 0.00315 | 719     | 0.00126  | 767     | 1.78E-04 | 1024.25   | 5.39E-28 |
| 687.3775 | 2.50E-05 | 719.15 | 6.22E-04 | 714.13 | 0.00311 | 719.164 | 0.00128  | 767.256 | 1.70E-04 | 1024.6135 | 3.66E-28 |
| 687.505  | 2.58E-05 | 719.3  | 6.30E-04 | 714.26 | 0.00308 | 719.328 | 0.00129  | 767.512 | 1.63E-04 | 1024.977  | 2.48E-28 |
| 687.6325 | 2.67E-05 | 719.45 | 6.38E-04 | 714.39 | 0.00304 | 719.492 | 0.00131  | 767.768 | 1.55E-04 | 1025.3405 | 1.68E-28 |
| 687.76   | 2.75E-05 | 719.6  | 6.47E-04 | 714.52 | 0.00301 | 719.656 | 0.00132  | 768.024 | 1.49E-04 | 1025.704  | 1.14E-28 |
| 687.8875 | 2.84E-05 | 719.75 | 6.55E-04 | 714.65 | 0.00297 | 719.82  | 0.00133  | 768.28  | 1.43E-04 | 1026.0675 | 7.68E-29 |

|          |          |        |          |        |         |         |         |         |          |           |          |
|----------|----------|--------|----------|--------|---------|---------|---------|---------|----------|-----------|----------|
| 688.015  | 2.93E-05 | 719.9  | 6.63E-04 | 714.78 | 0.00294 | 719.984 | 0.00135 | 768.536 | 1.37E-04 | 1026.431  | 5.18E-29 |
| 688.1425 | 3.02E-05 | 720.05 | 6.71E-04 | 714.91 | 0.00291 | 720.148 | 0.00136 | 768.792 | 1.32E-04 | 1026.7945 | 3.49E-29 |
| 688.27   | 3.11E-05 | 720.2  | 6.79E-04 | 715.04 | 0.00288 | 720.312 | 0.00137 | 769.048 | 1.28E-04 | 1027.158  | 2.35E-29 |
| 688.3975 | 3.21E-05 | 720.35 | 6.87E-04 | 715.17 | 0.00284 | 720.476 | 0.00139 | 769.304 | 1.24E-04 | 1027.5215 | 1.58E-29 |
| 688.525  | 3.31E-05 | 720.5  | 6.94E-04 | 715.3  | 0.00281 | 720.64  | 0.0014  | 769.56  | 1.20E-04 | 1027.885  | 1.06E-29 |
| 688.6525 | 3.41E-05 | 720.65 | 7.02E-04 | 715.43 | 0.00278 | 720.804 | 0.00141 | 769.816 | 1.16E-04 | 1028.2485 | 7.11E-30 |
| 688.78   | 3.51E-05 | 720.8  | 7.10E-04 | 715.56 | 0.00275 | 720.968 | 0.00143 | 770.072 | 1.13E-04 | 1028.612  | 4.76E-30 |
| 688.9075 | 3.62E-05 | 720.95 | 7.18E-04 | 715.69 | 0.00273 | 721.132 | 0.00144 | 770.328 | 1.10E-04 | 1028.9755 | 3.18E-30 |
| 689.035  | 3.73E-05 | 721.1  | 7.25E-04 | 715.82 | 0.0027  | 721.296 | 0.00145 | 770.584 | 1.08E-04 | 1029.339  | 2.12E-30 |
| 689.1625 | 3.84E-05 | 721.25 | 7.33E-04 | 715.95 | 0.00267 | 721.46  | 0.00147 | 770.84  | 1.05E-04 | 1029.7025 | 1.42E-30 |
| 689.29   | 3.96E-05 | 721.4  | 7.40E-04 | 716.08 | 0.00264 | 721.624 | 0.00148 | 771.096 | 1.03E-04 | 1030.066  | 9.43E-31 |
| 689.4175 | 4.07E-05 | 721.55 | 7.47E-04 | 716.21 | 0.00262 | 721.788 | 0.00149 | 771.352 | 1.02E-04 | 1030.4295 | 6.27E-31 |
| 689.545  | 4.19E-05 | 721.7  | 7.54E-04 | 716.34 | 0.00259 | 721.952 | 0.0015  | 771.608 | 9.99E-05 | 1030.793  | 4.17E-31 |
| 689.6725 | 4.32E-05 | 721.85 | 7.61E-04 | 716.47 | 0.00257 | 722.116 | 0.00152 | 771.864 | 9.85E-05 | 1031.1565 | 2.77E-31 |
| 689.8    | 4.44E-05 | 722    | 7.68E-04 | 716.6  | 0.00254 | 722.28  | 0.00153 | 772.12  | 9.72E-05 | 1031.52   | 1.85E-31 |
| 689.9275 | 4.57E-05 | 722.15 | 7.75E-04 | 716.73 | 0.00252 | 722.444 | 0.00154 | 772.376 | 9.61E-05 | 1031.8835 | 1.24E-31 |
| 690.055  | 4.70E-05 | 722.3  | 7.82E-04 | 716.86 | 0.0025  | 722.608 | 0.00155 | 772.632 | 9.51E-05 | 1032.247  | 8.45E-32 |
| 690.1825 | 4.84E-05 | 722.45 | 7.89E-04 | 716.99 | 0.00248 | 722.772 | 0.00156 | 772.888 | 9.43E-05 | 1032.6105 | 5.98E-32 |
| 690.31   | 4.98E-05 | 722.6  | 7.95E-04 | 717.12 | 0.00245 | 722.936 | 0.00157 | 773.144 | 9.35E-05 | 1032.974  | 4.56E-32 |
| 690.4375 | 5.12E-05 | 722.75 | 8.02E-04 | 717.25 | 0.00243 | 723.1   | 0.00159 | 773.4   | 9.29E-05 | 1033.3375 | 3.95E-32 |
| 690.565  | 5.26E-05 | 722.9  | 8.08E-04 | 717.38 | 0.00241 | 723.264 | 0.0016  | 773.656 | 9.24E-05 | 1033.701  | 4.04E-32 |
| 690.6925 | 5.41E-05 | 723.05 | 8.14E-04 | 717.51 | 0.00239 | 723.428 | 0.00161 | 773.912 | 9.20E-05 | 1034.0645 | 4.86E-32 |
| 690.82   | 5.56E-05 | 723.2  | 8.20E-04 | 717.64 | 0.00237 | 723.592 | 0.00162 | 774.168 | 9.16E-05 | 1034.428  | 6.55E-32 |
| 690.9475 | 5.72E-05 | 723.35 | 8.26E-04 | 717.77 | 0.00236 | 723.756 | 0.00163 | 774.424 | 9.13E-05 | 1034.7915 | 9.40E-32 |
| 691.075  | 5.88E-05 | 723.5  | 8.31E-04 | 717.9  | 0.00234 | 723.92  | 0.00164 | 774.68  | 9.11E-05 | 1035.155  | 1.39E-31 |
| 691.2025 | 6.04E-05 | 723.65 | 8.37E-04 | 718.03 | 0.00232 | 724.084 | 0.00165 | 774.936 | 9.09E-05 | 1035.5185 | 2.09E-31 |
| 691.33   | 6.20E-05 | 723.8  | 8.42E-04 | 718.16 | 0.0023  | 724.248 | 0.00166 | 775.192 | 9.07E-05 | 1035.882  | 3.15E-31 |
| 691.4575 | 6.37E-05 | 723.95 | 8.48E-04 | 718.29 | 0.00229 | 724.412 | 0.00167 | 775.448 | 9.06E-05 | 1036.2455 | 4.75E-31 |
| 691.585  | 6.54E-05 | 724.1  | 8.53E-04 | 718.42 | 0.00227 | 724.576 | 0.00167 | 775.704 | 9.05E-05 | 1036.609  | 7.17E-31 |
| 691.7125 | 6.72E-05 | 724.25 | 8.58E-04 | 718.55 | 0.00226 | 724.74  | 0.00168 | 775.96  | 9.04E-05 | 1036.9725 | 1.08E-30 |
| 691.84   | 6.90E-05 | 724.4  | 8.62E-04 | 718.68 | 0.00224 | 724.904 | 0.00169 | 776.216 | 9.03E-05 | 1037.336  | 1.63E-30 |
| 691.9675 | 7.08E-05 | 724.55 | 8.67E-04 | 718.81 | 0.00223 | 725.068 | 0.0017  | 776.472 | 9.02E-05 | 1037.6995 | 2.45E-30 |
| 692.095  | 7.27E-05 | 724.7  | 8.71E-04 | 718.94 | 0.00222 | 725.232 | 0.00171 | 776.728 | 9.02E-05 | 1038.063  | 3.69E-30 |
| 692.2225 | 7.46E-05 | 724.85 | 8.76E-04 | 719.07 | 0.0022  | 725.396 | 0.00171 | 776.984 | 9.01E-05 | 1038.4265 | 5.54E-30 |
| 692.35   | 7.65E-05 | 725    | 8.80E-04 | 719.2  | 0.00219 | 725.56  | 0.00172 | 777.24  | 9.00E-05 | 1038.79   | 8.30E-30 |
| 692.4775 | 7.85E-05 | 725.15 | 8.83E-04 | 719.33 | 0.00218 | 725.724 | 0.00173 | 777.496 | 8.99E-05 | 1039.1535 | 1.24E-29 |
| 692.605  | 8.05E-05 | 725.3  | 8.87E-04 | 719.46 | 0.00217 | 725.888 | 0.00174 | 777.752 | 8.98E-05 | 1039.517  | 1.86E-29 |
| 692.7325 | 8.26E-05 | 725.45 | 8.91E-04 | 719.59 | 0.00216 | 726.052 | 0.00174 | 778.008 | 8.97E-05 | 1039.8805 | 2.77E-29 |
| 692.86   | 8.47E-05 | 725.6  | 8.94E-04 | 719.72 | 0.00215 | 726.216 | 0.00175 | 778.264 | 8.95E-05 | 1040.244  | 4.14E-29 |
| 692.9875 | 8.69E-05 | 725.75 | 8.97E-04 | 719.85 | 0.00214 | 726.38  | 0.00175 | 778.52  | 8.93E-05 | 1040.6075 | 6.16E-29 |
| 693.115  | 8.90E-05 | 725.9  | 9.00E-04 | 719.98 | 0.00213 | 726.544 | 0.00176 | 778.776 | 8.91E-05 | 1040.971  | 9.17E-29 |
| 693.2425 | 9.13E-05 | 726.05 | 9.03E-04 | 720.11 | 0.00212 | 726.708 | 0.00176 | 779.032 | 8.89E-05 | 1041.3345 | 1.36E-28 |
| 693.37   | 9.35E-05 | 726.2  | 9.05E-04 | 720.24 | 0.00212 | 726.872 | 0.00177 | 779.288 | 8.86E-05 | 1041.698  | 2.02E-28 |
| 693.4975 | 9.58E-05 | 726.35 | 9.08E-04 | 720.37 | 0.00211 | 727.036 | 0.00177 | 779.544 | 8.83E-05 | 1042.0615 | 2.99E-28 |
| 693.625  | 9.82E-05 | 726.5  | 9.10E-04 | 720.5  | 0.0021  | 727.2   | 0.00178 | 779.8   | 8.79E-05 | 1042.425  | 4.43E-28 |
| 693.7525 | 1.01E-04 | 726.65 | 9.12E-04 | 720.63 | 0.0021  | 727.364 | 0.00178 | 780.056 | 8.75E-05 | 1042.7885 | 6.54E-28 |
| 693.88   | 1.03E-04 | 726.8  | 9.14E-04 | 720.76 | 0.00209 | 727.528 | 0.00178 | 780.312 | 8.71E-05 | 1043.152  | 9.65E-28 |
| 694.0075 | 1.05E-04 | 726.95 | 9.15E-04 | 720.89 | 0.00209 | 727.692 | 0.00178 | 780.568 | 8.67E-05 | 1043.5155 | 1.42E-27 |
| 694.135  | 1.08E-04 | 727.1  | 9.16E-04 | 721.02 | 0.00208 | 727.856 | 0.00179 | 780.824 | 8.62E-05 | 1043.879  | 2.09E-27 |
| 694.2625 | 1.11E-04 | 727.25 | 9.18E-04 | 721.15 | 0.00208 | 728.02  | 0.00179 | 781.08  | 8.56E-05 | 1044.2425 | 3.08E-27 |
| 694.39   | 1.13E-04 | 727.4  | 9.19E-04 | 721.28 | 0.00207 | 728.184 | 0.00179 | 781.336 | 8.50E-05 | 1044.606  | 4.52E-27 |

|          |          |        |          |        |         |         |         |         |          |           |          |
|----------|----------|--------|----------|--------|---------|---------|---------|---------|----------|-----------|----------|
| 694.5175 | 1.16E-04 | 727.55 | 9.19E-04 | 721.41 | 0.00207 | 728.348 | 0.00179 | 781.592 | 8.44E-05 | 1044.9695 | 6.62E-27 |
| 694.645  | 1.19E-04 | 727.7  | 9.20E-04 | 721.54 | 0.00207 | 728.512 | 0.00179 | 781.848 | 8.38E-05 | 1045.333  | 9.69E-27 |
| 694.7725 | 1.21E-04 | 727.85 | 9.20E-04 | 721.67 | 0.00207 | 728.676 | 0.00179 | 782.104 | 8.31E-05 | 1045.6965 | 1.42E-26 |
| 694.9    | 1.24E-04 | 728    | 9.20E-04 | 721.8  | 0.00206 | 728.84  | 0.00179 | 782.36  | 8.23E-05 | 1046.06   | 2.07E-26 |
| 695.0275 | 1.27E-04 | 728.15 | 9.20E-04 | 721.93 | 0.00206 | 729.004 | 0.00179 | 782.616 | 8.16E-05 | 1046.4235 | 3.02E-26 |
| 695.155  | 1.30E-04 | 728.3  | 9.20E-04 | 722.06 | 0.00206 | 729.168 | 0.00179 | 782.872 | 8.08E-05 | 1046.787  | 4.39E-26 |
| 695.2825 | 1.33E-04 | 728.45 | 9.19E-04 | 722.19 | 0.00206 | 729.332 | 0.00179 | 783.128 | 7.99E-05 | 1047.1505 | 6.39E-26 |
| 695.41   | 1.36E-04 | 728.6  | 9.19E-04 | 722.32 | 0.00206 | 729.496 | 0.00179 | 783.384 | 7.91E-05 | 1047.514  | 9.28E-26 |
| 695.5375 | 1.39E-04 | 728.75 | 9.18E-04 | 722.45 | 0.00206 | 729.66  | 0.00179 | 783.64  | 7.82E-05 | 1047.8775 | 1.35E-25 |
| 695.665  | 1.42E-04 | 728.9  | 9.17E-04 | 722.58 | 0.00206 | 729.824 | 0.00179 | 783.896 | 7.72E-05 | 1048.241  | 1.95E-25 |
| 695.7925 | 1.45E-04 | 729.05 | 9.15E-04 | 722.71 | 0.00206 | 729.988 | 0.00178 | 784.152 | 7.63E-05 | 1048.6045 | 2.82E-25 |
| 695.92   | 1.48E-04 | 729.2  | 9.14E-04 | 722.84 | 0.00206 | 730.152 | 0.00178 | 784.408 | 7.53E-05 | 1048.968  | 4.07E-25 |
| 696.0475 | 1.51E-04 | 729.35 | 9.12E-04 | 722.97 | 0.00207 | 730.316 | 0.00178 | 784.664 | 7.43E-05 | 1049.3315 | 5.88E-25 |
| 696.175  | 1.54E-04 | 729.5  | 9.10E-04 | 723.1  | 0.00207 | 730.48  | 0.00177 | 784.92  | 7.33E-05 | 1049.695  | 8.47E-25 |
| 696.3025 | 1.58E-04 | 729.65 | 9.08E-04 | 723.23 | 0.00207 | 730.644 | 0.00177 | 785.176 | 7.23E-05 | 1050.0585 | 1.22E-24 |
| 696.43   | 1.61E-04 | 729.8  | 9.06E-04 | 723.36 | 0.00207 | 730.808 | 0.00177 | 785.432 | 7.12E-05 | 1050.422  | 1.75E-24 |
| 696.5575 | 1.64E-04 | 729.95 | 9.03E-04 | 723.49 | 0.00208 | 730.972 | 0.00176 | 785.688 | 7.01E-05 | 1050.7855 | 2.51E-24 |
| 696.685  | 1.68E-04 | 730.1  | 9.01E-04 | 723.62 | 0.00208 | 731.136 | 0.00176 | 785.944 | 6.91E-05 | 1051.149  | 3.60E-24 |
| 696.8125 | 1.71E-04 | 730.25 | 8.98E-04 | 723.75 | 0.00208 | 731.3   | 0.00175 | 786.2   | 6.80E-05 | 1051.5125 | 5.16E-24 |
| 696.94   | 1.75E-04 | 730.4  | 8.95E-04 | 723.88 | 0.00209 | 731.464 | 0.00175 | 786.456 | 6.69E-05 | 1051.876  | 7.37E-24 |
| 697.0675 | 1.78E-04 | 730.55 | 8.91E-04 | 724.01 | 0.00209 | 731.628 | 0.00174 | 786.712 | 6.58E-05 | 1052.2395 | 1.05E-23 |
| 697.195  | 1.82E-04 | 730.7  | 8.88E-04 | 724.14 | 0.0021  | 731.792 | 0.00173 | 786.968 | 6.48E-05 | 1052.603  | 1.50E-23 |
| 697.3225 | 1.86E-04 | 730.85 | 8.84E-04 | 724.27 | 0.0021  | 731.956 | 0.00173 | 787.224 | 6.37E-05 | 1052.9665 | 2.14E-23 |
| 697.45   | 1.89E-04 | 731    | 8.81E-04 | 724.4  | 0.00211 | 732.12  | 0.00172 | 787.48  | 6.26E-05 | 1053.33   | 3.04E-23 |
| 697.5775 | 1.93E-04 | 731.15 | 8.77E-04 | 724.53 | 0.00211 | 732.284 | 0.00171 | 787.736 | 6.16E-05 | 1053.6935 | 4.31E-23 |
| 697.705  | 1.97E-04 | 731.3  | 8.72E-04 | 724.66 | 0.00212 | 732.448 | 0.0017  | 787.992 | 6.06E-05 | 1054.057  | 6.12E-23 |
| 697.8325 | 2.01E-04 | 731.45 | 8.68E-04 | 724.79 | 0.00213 | 732.612 | 0.00169 | 788.248 | 5.96E-05 | 1054.4205 | 8.67E-23 |
| 697.96   | 2.05E-04 | 731.6  | 8.64E-04 | 724.92 | 0.00213 | 732.776 | 0.00169 | 788.504 | 5.87E-05 | 1054.784  | 1.23E-22 |
| 698.0875 | 2.09E-04 | 731.75 | 8.59E-04 | 725.05 | 0.00214 | 732.94  | 0.00168 | 788.76  | 5.78E-05 | 1055.1475 | 1.73E-22 |
| 698.215  | 2.13E-04 | 731.9  | 8.54E-04 | 725.18 | 0.00215 | 733.104 | 0.00167 | 789.016 | 5.69E-05 | 1055.511  | 2.44E-22 |
| 698.3425 | 2.17E-04 | 732.05 | 8.49E-04 | 725.31 | 0.00215 | 733.268 | 0.00166 | 789.272 | 5.61E-05 | 1055.8745 | 3.44E-22 |
| 698.47   | 2.21E-04 | 732.2  | 8.44E-04 | 725.44 | 0.00216 | 733.432 | 0.00165 | 789.528 | 5.53E-05 | 1056.238  | 4.84E-22 |
| 698.5975 | 2.25E-04 | 732.35 | 8.39E-04 | 725.57 | 0.00217 | 733.596 | 0.00164 | 789.784 | 5.46E-05 | 1056.6015 | 6.80E-22 |
| 698.725  | 2.29E-04 | 732.5  | 8.33E-04 | 725.7  | 0.00218 | 733.76  | 0.00163 | 790.04  | 5.40E-05 | 1056.965  | 9.55E-22 |
| 698.8525 | 2.33E-04 | 732.65 | 8.28E-04 | 725.83 | 0.00219 | 733.924 | 0.00161 | 790.296 | 5.35E-05 | 1057.3285 | 1.34E-21 |
| 698.98   | 2.37E-04 | 732.8  | 8.22E-04 | 725.96 | 0.00219 | 734.088 | 0.0016  | 790.552 | 5.30E-05 | 1057.692  | 1.87E-21 |
| 699.1075 | 2.42E-04 | 732.95 | 8.16E-04 | 726.09 | 0.0022  | 734.252 | 0.00159 | 790.808 | 5.26E-05 | 1058.0555 | 2.62E-21 |
| 699.235  | 2.46E-04 | 733.1  | 8.10E-04 | 726.22 | 0.00221 | 734.416 | 0.00158 | 791.064 | 5.24E-05 | 1058.419  | 3.65E-21 |
| 699.3625 | 2.50E-04 | 733.25 | 8.04E-04 | 726.35 | 0.00222 | 734.58  | 0.00157 | 791.32  | 5.22E-05 | 1058.7825 | 5.10E-21 |
| 699.49   | 2.55E-04 | 733.4  | 7.98E-04 | 726.48 | 0.00223 | 734.744 | 0.00156 | 791.576 | 5.22E-05 | 1059.146  | 7.09E-21 |
| 699.6175 | 2.59E-04 | 733.55 | 7.92E-04 | 726.61 | 0.00224 | 734.908 | 0.00154 | 791.832 | 5.23E-05 | 1059.5095 | 9.86E-21 |
| 699.745  | 2.64E-04 | 733.7  | 7.85E-04 | 726.74 | 0.00225 | 735.072 | 0.00153 | 792.088 | 5.26E-05 | 1059.873  | 1.37E-20 |
| 699.8725 | 2.68E-04 | 733.85 | 7.79E-04 | 726.87 | 0.00226 | 735.236 | 0.00152 | 792.344 | 5.30E-05 | 1060.2365 | 1.90E-20 |
| 700      | 2.73E-04 | 734    | 7.72E-04 | 727    | 0.00227 | 735.4   | 0.0015  | 792.6   | 5.35E-05 | 1060.6    | 2.63E-20 |
| 700.1275 | 2.77E-04 | 734.15 | 7.65E-04 | 727.13 | 0.00228 | 735.564 | 0.00149 | 792.856 | 5.43E-05 | 1060.9635 | 3.64E-20 |
| 700.255  | 2.82E-04 | 734.3  | 7.58E-04 | 727.26 | 0.00229 | 735.728 | 0.00148 | 793.112 | 5.53E-05 | 1061.327  | 5.02E-20 |
| 700.3825 | 2.87E-04 | 734.45 | 7.51E-04 | 727.39 | 0.0023  | 735.892 | 0.00146 | 793.368 | 5.65E-05 | 1061.6905 | 6.93E-20 |
| 700.51   | 2.91E-04 | 734.6  | 7.44E-04 | 727.52 | 0.00231 | 736.056 | 0.00145 | 793.624 | 5.79E-05 | 1062.054  | 9.55E-20 |
| 700.6375 | 2.96E-04 | 734.75 | 7.37E-04 | 727.65 | 0.00232 | 736.22  | 0.00143 | 793.88  | 5.95E-05 | 1062.4175 | 1.31E-19 |
| 700.765  | 3.01E-04 | 734.9  | 7.30E-04 | 727.78 | 0.00233 | 736.384 | 0.00142 | 794.136 | 6.15E-05 | 1062.781  | 1.80E-19 |
| 700.8925 | 3.06E-04 | 735.05 | 7.23E-04 | 727.91 | 0.00234 | 736.548 | 0.0014  | 794.392 | 6.37E-05 | 1063.1445 | 2.48E-19 |



|          |          |        |          |        |         |         |          |         |          |           |          |
|----------|----------|--------|----------|--------|---------|---------|----------|---------|----------|-----------|----------|
| 701.02   | 3.11E-04 | 735.2  | 7.15E-04 | 728.04 | 0.00235 | 736.712 | 0.00139  | 794.648 | 6.62E-05 | 1063.508  | 3.39E-19 |
| 701.1475 | 3.16E-04 | 735.35 | 7.08E-04 | 728.17 | 0.00236 | 736.876 | 0.00137  | 794.904 | 6.91E-05 | 1063.8715 | 4.64E-19 |
| 701.275  | 3.21E-04 | 735.5  | 7.01E-04 | 728.3  | 0.00237 | 737.04  | 0.00136  | 795.16  | 7.23E-05 | 1064.235  | 6.35E-19 |
| 701.4025 | 3.26E-04 | 735.65 | 6.93E-04 | 728.43 | 0.00238 | 737.204 | 0.00134  | 795.416 | 7.59E-05 | 1064.5985 | 8.66E-19 |
| 701.53   | 3.31E-04 | 735.8  | 6.86E-04 | 728.56 | 0.0024  | 737.368 | 0.00133  | 795.672 | 7.99E-05 | 1064.962  | 1.18E-18 |
| 701.6575 | 3.36E-04 | 735.95 | 6.78E-04 | 728.69 | 0.00241 | 737.532 | 0.00131  | 795.928 | 8.43E-05 | 1065.3255 | 1.61E-18 |
| 701.785  | 3.41E-04 | 736.1  | 6.70E-04 | 728.82 | 0.00242 | 737.696 | 0.0013   | 796.184 | 8.93E-05 | 1065.689  | 2.19E-18 |
| 701.9125 | 3.46E-04 | 736.25 | 6.63E-04 | 728.95 | 0.00243 | 737.86  | 0.00128  | 796.44  | 9.47E-05 | 1066.0525 | 2.97E-18 |
| 702.04   | 3.51E-04 | 736.4  | 6.55E-04 | 729.08 | 0.00244 | 738.024 | 0.00126  | 796.696 | 1.01E-04 | 1066.416  | 4.02E-18 |
| 702.1675 | 3.56E-04 | 736.55 | 6.48E-04 | 729.21 | 0.00245 | 738.188 | 0.00125  | 796.952 | 1.07E-04 | 1066.7795 | 5.45E-18 |
| 702.295  | 3.61E-04 | 736.7  | 6.40E-04 | 729.34 | 0.00246 | 738.352 | 0.00123  | 797.208 | 1.14E-04 | 1067.143  | 7.37E-18 |
| 702.4225 | 3.66E-04 | 736.85 | 6.32E-04 | 729.47 | 0.00248 | 738.516 | 0.00121  | 797.464 | 1.22E-04 | 1067.5065 | 9.95E-18 |
| 702.55   | 3.72E-04 | 737    | 6.24E-04 | 729.6  | 0.00249 | 738.68  | 0.0012   | 797.72  | 1.31E-04 | 1067.87   | 1.34E-17 |
| 702.6775 | 3.77E-04 | 737.15 | 6.17E-04 | 729.73 | 0.0025  | 738.844 | 0.00118  | 797.976 | 1.40E-04 | 1068.2335 | 1.81E-17 |
| 702.805  | 3.82E-04 | 737.3  | 6.09E-04 | 729.86 | 0.00251 | 739.008 | 0.00117  | 798.232 | 1.50E-04 | 1068.597  | 2.43E-17 |
| 702.9325 | 3.87E-04 | 737.45 | 6.01E-04 | 729.99 | 0.00252 | 739.172 | 0.00115  | 798.488 | 1.61E-04 | 1068.9605 | 3.27E-17 |
| 703.06   | 3.93E-04 | 737.6  | 5.94E-04 | 730.12 | 0.00253 | 739.336 | 0.00113  | 798.744 | 1.72E-04 | 1069.324  | 4.38E-17 |
| 703.1875 | 3.98E-04 | 737.75 | 5.86E-04 | 730.25 | 0.00254 | 739.5   | 0.00112  | 799     | 1.85E-04 | 1069.6875 | 5.87E-17 |
| 703.315  | 4.03E-04 | 737.9  | 5.79E-04 | 730.38 | 0.00256 | 739.664 | 0.00111  | 799.256 | 1.99E-04 | 1070.051  | 7.86E-17 |
| 703.4425 | 4.09E-04 | 738.05 | 5.71E-04 | 730.51 | 0.00257 | 739.828 | 0.00108  | 799.512 | 2.13E-04 | 1070.4145 | 1.05E-16 |
| 703.57   | 4.14E-04 | 738.2  | 5.64E-04 | 730.64 | 0.00258 | 739.992 | 0.00107  | 799.768 | 2.29E-04 | 1070.778  | 1.40E-16 |
| 703.6975 | 4.20E-04 | 738.35 | 5.56E-04 | 730.77 | 0.00259 | 740.156 | 0.00105  | 800.024 | 2.46E-04 | 1071.1415 | 1.87E-16 |
| 703.825  | 4.25E-04 | 738.5  | 5.49E-04 | 730.9  | 0.0026  | 740.32  | 0.00103  | 800.28  | 2.65E-04 | 1071.505  | 2.49E-16 |
| 703.9525 | 4.31E-04 | 738.65 | 5.42E-04 | 731.03 | 0.00261 | 740.484 | 0.00102  | 800.536 | 2.84E-04 | 1071.8685 | 3.31E-16 |
| 704.08   | 4.36E-04 | 738.8  | 5.34E-04 | 731.16 | 0.00262 | 740.648 | 9.99E-04 | 800.792 | 3.05E-04 | 1072.232  | 4.39E-16 |
| 704.2075 | 4.41E-04 | 738.95 | 5.27E-04 | 731.29 | 0.00264 | 740.812 | 9.83E-04 | 801.048 | 3.28E-04 | 1072.5955 | 5.82E-16 |
| 704.335  | 4.47E-04 | 739.1  | 5.20E-04 | 731.42 | 0.00265 | 740.976 | 9.66E-04 | 801.304 | 3.52E-04 | 1072.959  | 7.71E-16 |
| 704.4625 | 4.52E-04 | 739.25 | 5.13E-04 | 731.55 | 0.00266 | 741.14  | 9.50E-04 | 801.56  | 3.78E-04 | 1073.3225 | 1.02E-15 |
| 704.59   | 4.58E-04 | 739.4  | 5.06E-04 | 731.68 | 0.00267 | 741.304 | 9.33E-04 | 801.816 | 4.05E-04 | 1073.686  | 1.35E-15 |
| 704.7175 | 4.63E-04 | 739.55 | 4.99E-04 | 731.81 | 0.00268 | 741.468 | 9.17E-04 | 802.072 | 4.35E-04 | 1074.0495 | 1.77E-15 |
| 704.845  | 4.69E-04 | 739.7  | 4.92E-04 | 731.94 | 0.00269 | 741.632 | 9.01E-04 | 802.328 | 4.66E-04 | 1074.413  | 2.34E-15 |
| 704.9725 | 4.74E-04 | 739.85 | 4.86E-04 | 732.07 | 0.0027  | 741.796 | 8.85E-04 | 802.584 | 4.99E-04 | 1074.7765 | 3.07E-15 |
| 705.1    | 4.80E-04 | 740    | 4.79E-04 | 732.2  | 0.00271 | 741.96  | 8.69E-04 | 802.84  | 5.35E-04 | 1075.14   | 4.04E-15 |
| 705.2275 | 4.86E-04 | 740.15 | 4.73E-04 | 732.33 | 0.00272 | 742.124 | 8.53E-04 | 803.096 | 5.72E-04 | 1075.5035 | 5.30E-15 |
| 705.355  | 4.91E-04 | 740.3  | 4.67E-04 | 732.46 | 0.00273 | 742.288 | 8.37E-04 | 803.352 | 6.12E-04 | 1075.867  | 6.94E-15 |
| 705.4825 | 4.97E-04 | 740.45 | 4.61E-04 | 732.59 | 0.00274 | 742.452 | 8.22E-04 | 803.608 | 6.55E-04 | 1076.2305 | 9.08E-15 |
| 705.61   | 5.02E-04 | 740.6  | 4.55E-04 | 732.72 | 0.00275 | 742.616 | 8.06E-04 | 803.864 | 7.00E-04 | 1076.594  | 1.19E-14 |
| 705.7375 | 5.08E-04 | 740.75 | 4.49E-04 | 732.85 | 0.00276 | 742.78  | 7.91E-04 | 804.12  | 7.47E-04 | 1076.9575 | 1.55E-14 |
| 705.865  | 5.13E-04 | 740.9  | 4.43E-04 | 732.98 | 0.00277 | 742.944 | 7.76E-04 | 804.376 | 7.98E-04 | 1077.321  | 2.02E-14 |
| 705.9925 | 5.19E-04 | 741.05 | 4.37E-04 | 733.11 | 0.00278 | 743.108 | 7.61E-04 | 804.632 | 8.51E-04 | 1077.6845 | 2.63E-14 |
| 706.12   | 5.24E-04 | 741.2  | 4.32E-04 | 733.24 | 0.00279 | 743.272 | 7.46E-04 | 804.888 | 9.08E-04 | 1078.048  | 3.41E-14 |
| 706.2475 | 5.30E-04 | 741.35 | 4.27E-04 | 733.37 | 0.0028  | 743.436 | 7.31E-04 | 805.144 | 9.67E-04 | 1078.4115 | 4.43E-14 |
| 706.375  | 5.35E-04 | 741.5  | 4.22E-04 | 733.5  | 0.00281 | 743.6   | 7.17E-04 | 805.4   | 0.00103  | 1078.775  | 5.75E-14 |
| 706.5025 | 5.41E-04 | 741.65 | 4.17E-04 | 733.63 | 0.00281 | 743.764 | 7.02E-04 | 805.656 | 0.0011   | 1079.1385 | 7.44E-14 |
| 706.63   | 5.46E-04 | 741.8  | 4.12E-04 | 733.76 | 0.00282 | 743.928 | 6.88E-04 | 805.912 | 0.00117  | 1079.502  | 9.62E-14 |
| 706.7575 | 5.52E-04 | 741.95 | 4.08E-04 | 733.89 | 0.00283 | 744.092 | 6.74E-04 | 806.168 | 0.00124  | 1079.8655 | 1.24E-13 |
| 706.885  | 5.57E-04 | 742.1  | 4.03E-04 | 734.02 | 0.00284 | 744.256 | 6.60E-04 | 806.424 | 0.00132  | 1080.229  | 1.60E-13 |
| 707.0125 | 5.63E-04 | 742.25 | 3.99E-04 | 734.15 | 0.00285 | 744.42  | 6.47E-04 | 806.68  | 0.0014   | 1080.5925 | 2.06E-13 |
| 707.14   | 5.68E-04 | 742.4  | 3.95E-04 | 734.28 | 0.00285 | 744.584 | 6.33E-04 | 806.936 | 0.00148  | 1080.956  | 2.65E-13 |
| 707.2675 | 5.74E-04 | 742.55 | 3.92E-04 | 734.41 | 0.00286 | 744.748 | 6.20E-04 | 807.192 | 0.00157  | 1081.3195 | 3.41E-13 |
| 707.395  | 5.79E-04 | 742.7  | 3.88E-04 | 734.54 | 0.00287 | 744.912 | 6.07E-04 | 807.448 | 0.00167  | 1081.683  | 4.37E-13 |

|          |          |        |          |        |         |         |          |         |         |           |          |
|----------|----------|--------|----------|--------|---------|---------|----------|---------|---------|-----------|----------|
| 707.5225 | 5.84E-04 | 742.85 | 3.85E-04 | 734.67 | 0.00288 | 745.076 | 5.94E-04 | 807.704 | 0.00176 | 1082.0465 | 5.60E-13 |
| 707.65   | 5.90E-04 | 743    | 3.82E-04 | 734.8  | 0.00288 | 745.24  | 5.82E-04 | 807.96  | 0.00187 | 1082.41   | 7.16E-13 |
| 707.7775 | 5.95E-04 | 743.15 | 3.80E-04 | 734.93 | 0.00289 | 745.404 | 5.70E-04 | 808.216 | 0.00198 | 1082.7735 | 9.15E-13 |
| 707.905  | 6.01E-04 | 743.3  | 3.77E-04 | 735.06 | 0.0029  | 745.568 | 5.58E-04 | 808.472 | 0.00209 | 1083.137  | 1.17E-12 |
| 708.0325 | 6.06E-04 | 743.45 | 3.75E-04 | 735.19 | 0.0029  | 745.732 | 5.46E-04 | 808.728 | 0.0022  | 1083.5005 | 1.49E-12 |
| 708.16   | 6.11E-04 | 743.6  | 3.73E-04 | 735.32 | 0.00291 | 745.896 | 5.34E-04 | 808.984 | 0.00233 | 1083.864  | 1.89E-12 |
| 708.2875 | 6.16E-04 | 743.75 | 3.71E-04 | 735.45 | 0.00291 | 746.06  | 5.23E-04 | 809.24  | 0.00246 | 1084.2275 | 2.41E-12 |
| 708.415  | 6.22E-04 | 743.9  | 3.70E-04 | 735.58 | 0.00292 | 746.224 | 5.12E-04 | 809.496 | 0.00259 | 1084.591  | 3.05E-12 |
| 708.5425 | 6.27E-04 | 744.05 | 3.69E-04 | 735.71 | 0.00292 | 746.388 | 5.02E-04 | 809.752 | 0.00273 | 1084.9545 | 3.87E-12 |
| 708.67   | 6.32E-04 | 744.2  | 3.68E-04 | 735.84 | 0.00293 | 746.552 | 4.91E-04 | 810.008 | 0.00287 | 1085.318  | 4.90E-12 |
| 708.7975 | 6.37E-04 | 744.35 | 3.68E-04 | 735.97 | 0.00293 | 746.716 | 4.81E-04 | 810.264 | 0.00302 | 1085.6815 | 6.20E-12 |
| 708.925  | 6.42E-04 | 744.5  | 3.67E-04 | 736.1  | 0.00294 | 746.88  | 4.71E-04 | 810.52  | 0.00318 | 1086.045  | 7.82E-12 |
| 709.0525 | 6.47E-04 | 744.65 | 3.67E-04 | 736.23 | 0.00294 | 747.044 | 4.61E-04 | 810.776 | 0.00334 | 1086.4085 | 9.86E-12 |
| 709.18   | 6.53E-04 | 744.8  | 3.68E-04 | 736.36 | 0.00294 | 747.208 | 4.52E-04 | 811.032 | 0.0035  | 1086.772  | 1.24E-11 |
| 709.3075 | 6.58E-04 | 744.95 | 3.69E-04 | 736.49 | 0.00295 | 747.372 | 4.43E-04 | 811.288 | 0.00368 | 1087.1355 | 1.56E-11 |
| 709.435  | 6.63E-04 | 745.1  | 3.70E-04 | 736.62 | 0.00295 | 747.536 | 4.34E-04 | 811.544 | 0.00386 | 1087.499  | 1.96E-11 |
| 709.5625 | 6.68E-04 | 745.25 | 3.71E-04 | 736.75 | 0.00295 | 747.7   | 4.26E-04 | 811.8   | 0.00404 | 1087.8625 | 2.46E-11 |
| 709.69   | 6.72E-04 | 745.4  | 3.73E-04 | 736.88 | 0.00295 | 747.864 | 4.18E-04 | 812.056 | 0.00423 | 1088.226  | 3.08E-11 |
| 709.8175 | 6.77E-04 | 745.55 | 3.76E-04 | 737.01 | 0.00296 | 748.028 | 4.10E-04 | 812.312 | 0.00443 | 1088.5895 | 3.85E-11 |
| 709.945  | 6.82E-04 | 745.7  | 3.78E-04 | 737.14 | 0.00296 | 748.192 | 4.03E-04 | 812.568 | 0.00463 | 1088.953  | 4.82E-11 |
| 710.0725 | 6.87E-04 | 745.85 | 3.81E-04 | 737.27 | 0.00296 | 748.356 | 3.96E-04 | 812.824 | 0.00484 | 1089.3165 | 6.01E-11 |
| 710.2    | 6.92E-04 | 746    | 3.84E-04 | 737.4  | 0.00296 | 748.52  | 3.89E-04 | 813.08  | 0.00506 | 1089.68   | 7.49E-11 |
| 710.3275 | 6.97E-04 | 746.15 | 3.88E-04 | 737.53 | 0.00296 | 748.684 | 3.83E-04 | 813.336 | 0.00528 | 1090.0435 | 9.32E-11 |
| 710.455  | 7.01E-04 | 746.3  | 3.92E-04 | 737.66 | 0.00296 | 748.848 | 3.77E-04 | 813.592 | 0.00551 | 1090.407  | 1.16E-10 |
| 710.5825 | 7.06E-04 | 746.45 | 3.97E-04 | 737.79 | 0.00296 | 749.012 | 3.71E-04 | 813.848 | 0.00574 | 1090.7705 | 1.44E-10 |
| 710.71   | 7.10E-04 | 746.6  | 4.02E-04 | 737.92 | 0.00296 | 749.176 | 3.66E-04 | 814.104 | 0.00599 | 1091.134  | 1.78E-10 |
| 710.8375 | 7.15E-04 | 746.75 | 4.08E-04 | 738.05 | 0.00296 | 749.34  | 3.61E-04 | 814.36  | 0.00623 | 1091.4975 | 2.20E-10 |
| 710.965  | 7.20E-04 | 746.9  | 4.14E-04 | 738.18 | 0.00296 | 749.504 | 3.56E-04 | 814.616 | 0.00648 | 1091.861  | 2.72E-10 |
| 711.0925 | 7.24E-04 | 747.05 | 4.20E-04 | 738.31 | 0.00296 | 749.668 | 3.52E-04 | 814.872 | 0.00674 | 1092.2245 | 3.36E-10 |
| 711.22   | 7.28E-04 | 747.2  | 4.27E-04 | 738.44 | 0.00295 | 749.832 | 3.48E-04 | 815.128 | 0.00701 | 1092.588  | 4.15E-10 |
| 711.3475 | 7.33E-04 | 747.35 | 4.34E-04 | 738.57 | 0.00295 | 749.996 | 3.45E-04 | 815.384 | 0.00728 | 1092.9515 | 5.11E-10 |
| 711.475  | 7.37E-04 | 747.5  | 4.42E-04 | 738.7  | 0.00295 | 750.16  | 3.42E-04 | 815.64  | 0.00755 | 1093.315  | 6.28E-10 |
| 711.6025 | 7.41E-04 | 747.65 | 4.50E-04 | 738.83 | 0.00295 | 750.324 | 3.39E-04 | 815.896 | 0.00783 | 1093.6785 | 7.71E-10 |
| 711.73   | 7.46E-04 | 747.8  | 4.59E-04 | 738.96 | 0.00294 | 750.488 | 3.37E-04 | 816.152 | 0.00812 | 1094.042  | 9.45E-10 |
| 711.8575 | 7.50E-04 | 747.95 | 4.69E-04 | 739.09 | 0.00294 | 750.652 | 3.35E-04 | 816.408 | 0.00841 | 1094.4055 | 1.16E-09 |
| 711.985  | 7.54E-04 | 748.1  | 4.79E-04 | 739.22 | 0.00294 | 750.816 | 3.33E-04 | 816.664 | 0.0087  | 1094.769  | 1.42E-09 |
| 712.1125 | 7.58E-04 | 748.25 | 4.89E-04 | 739.35 | 0.00293 | 750.98  | 3.32E-04 | 816.92  | 0.009   | 1095.1325 | 1.73E-09 |
| 712.24   | 7.62E-04 | 748.4  | 5.00E-04 | 739.48 | 0.00293 | 751.144 | 3.32E-04 | 817.176 | 0.0093  | 1095.496  | 2.11E-09 |
| 712.3675 | 7.66E-04 | 748.55 | 5.12E-04 | 739.61 | 0.00292 | 751.308 | 3.32E-04 | 817.432 | 0.00961 | 1095.8595 | 2.57E-09 |
| 712.495  | 7.70E-04 | 748.7  | 5.24E-04 | 739.74 | 0.00292 | 751.472 | 3.32E-04 | 817.688 | 0.00992 | 1096.223  | 3.13E-09 |
| 712.6225 | 7.73E-04 | 748.85 | 5.36E-04 | 739.87 | 0.00291 | 751.636 | 3.33E-04 | 817.944 | 0.01024 | 1096.5865 | 3.80E-09 |
| 712.75   | 7.77E-04 | 749    | 5.50E-04 | 740    | 0.00291 | 751.8   | 3.35E-04 | 818.2   | 0.01055 | 1096.95   | 4.61E-09 |
| 712.8775 | 7.81E-04 | 749.15 | 5.64E-04 | 740.13 | 0.0029  | 751.964 | 3.36E-04 | 818.456 | 0.01087 | 1097.3135 | 5.59E-09 |
| 713.005  | 7.85E-04 | 749.3  | 5.78E-04 | 740.26 | 0.00289 | 752.128 | 3.39E-04 | 818.712 | 0.0112  | 1097.677  | 6.77E-09 |
| 713.1325 | 7.88E-04 | 749.45 | 5.93E-04 | 740.39 | 0.00289 | 752.292 | 3.41E-04 | 818.968 | 0.01152 | 1098.0405 | 8.18E-09 |
| 713.26   | 7.92E-04 | 749.6  | 6.09E-04 | 740.52 | 0.00288 | 752.456 | 3.45E-04 | 819.224 | 0.01185 | 1098.404  | 9.87E-09 |
| 713.3875 | 7.95E-04 | 749.75 | 6.26E-04 | 740.65 | 0.00287 | 752.62  | 3.49E-04 | 819.48  | 0.01217 | 1098.7675 | 1.19E-08 |
| 713.515  | 7.98E-04 | 749.9  | 6.43E-04 | 740.78 | 0.00286 | 752.784 | 3.53E-04 | 819.736 | 0.0125  | 1099.131  | 1.43E-08 |
| 713.6425 | 8.02E-04 | 750.05 | 6.61E-04 | 740.91 | 0.00286 | 752.948 | 3.58E-04 | 819.992 | 0.01283 | 1099.4945 | 1.72E-08 |
| 713.77   | 8.05E-04 | 750.2  | 6.79E-04 | 741.04 | 0.00285 | 753.112 | 3.63E-04 | 820.248 | 0.01316 | 1099.858  | 2.07E-08 |
| 713.8975 | 8.08E-04 | 750.35 | 6.98E-04 | 741.17 | 0.00284 | 753.276 | 3.69E-04 | 820.504 | 0.01349 | 1100.2215 | 2.48E-08 |

|          |          |        |          |        |         |         |          |         |         |           |          |
|----------|----------|--------|----------|--------|---------|---------|----------|---------|---------|-----------|----------|
| 714.025  | 8.11E-04 | 750.5  | 7.18E-04 | 741.3  | 0.00283 | 753.44  | 3.76E-04 | 820.76  | 0.01382 | 1100.585  | 2.97E-08 |
| 714.1525 | 8.14E-04 | 750.65 | 7.39E-04 | 741.43 | 0.00282 | 753.604 | 3.83E-04 | 821.016 | 0.01414 | 1100.9485 | 3.55E-08 |
| 714.28   | 8.17E-04 | 750.8  | 7.60E-04 | 741.56 | 0.00281 | 753.768 | 3.91E-04 | 821.272 | 0.01447 | 1101.312  | 4.24E-08 |
| 714.4075 | 8.20E-04 | 750.95 | 7.82E-04 | 741.69 | 0.0028  | 753.932 | 3.99E-04 | 821.528 | 0.01479 | 1101.6755 | 5.06E-08 |
| 714.535  | 8.23E-04 | 751.1  | 8.05E-04 | 741.82 | 0.00279 | 754.096 | 4.08E-04 | 821.784 | 0.01511 | 1102.039  | 6.03E-08 |
| 714.6625 | 8.26E-04 | 751.25 | 8.29E-04 | 741.95 | 0.00278 | 754.26  | 4.18E-04 | 822.04  | 0.01542 | 1102.4025 | 7.17E-08 |
| 714.79   | 8.29E-04 | 751.4  | 8.53E-04 | 742.08 | 0.00277 | 754.424 | 4.28E-04 | 822.296 | 0.01574 | 1102.766  | 8.52E-08 |
| 714.9175 | 8.31E-04 | 751.55 | 8.78E-04 | 742.21 | 0.00275 | 754.588 | 4.39E-04 | 822.552 | 0.01604 | 1103.1295 | 1.01E-07 |
| 715.045  | 8.34E-04 | 751.7  | 9.04E-04 | 742.34 | 0.00274 | 754.752 | 4.51E-04 | 822.808 | 0.01635 | 1103.493  | 1.20E-07 |
| 715.1725 | 8.36E-04 | 751.85 | 9.31E-04 | 742.47 | 0.00273 | 754.916 | 4.63E-04 | 823.064 | 0.01665 | 1103.8565 | 1.42E-07 |
| 715.3    | 8.39E-04 | 752    | 9.59E-04 | 742.6  | 0.00272 | 755.08  | 4.76E-04 | 823.32  | 0.01694 | 1104.22   | 1.68E-07 |
| 715.4275 | 8.41E-04 | 752.15 | 9.87E-04 | 742.73 | 0.0027  | 755.244 | 4.90E-04 | 823.576 | 0.01723 | 1104.5835 | 1.98E-07 |
| 715.555  | 8.43E-04 | 752.3  | 0.00102  | 742.86 | 0.00269 | 755.408 | 5.04E-04 | 823.832 | 0.01751 | 1104.947  | 2.33E-07 |
| 715.6825 | 8.46E-04 | 752.45 | 0.00105  | 742.99 | 0.00268 | 755.572 | 5.20E-04 | 824.088 | 0.01778 | 1105.3105 | 2.74E-07 |
| 715.81   | 8.48E-04 | 752.6  | 0.00108  | 743.12 | 0.00266 | 755.736 | 5.36E-04 | 824.344 | 0.01804 | 1105.674  | 3.23E-07 |
| 715.9375 | 8.50E-04 | 752.75 | 0.00111  | 743.25 | 0.00265 | 755.9   | 5.52E-04 | 824.6   | 0.0183  | 1106.0375 | 3.79E-07 |
| 716.065  | 8.52E-04 | 752.9  | 0.00114  | 743.38 | 0.00263 | 756.064 | 5.70E-04 | 824.856 | 0.01855 | 1106.401  | 4.44E-07 |
| 716.1925 | 8.54E-04 | 753.05 | 0.00118  | 743.51 | 0.00262 | 756.228 | 5.88E-04 | 825.112 | 0.01879 | 1106.7645 | 5.20E-07 |
| 716.32   | 8.56E-04 | 753.2  | 0.00121  | 743.64 | 0.0026  | 756.392 | 6.07E-04 | 825.368 | 0.01902 | 1107.128  | 6.08E-07 |
| 716.4475 | 8.57E-04 | 753.35 | 0.00125  | 743.77 | 0.00259 | 756.556 | 6.27E-04 | 825.624 | 0.01924 | 1107.4915 | 7.10E-07 |
| 716.575  | 8.59E-04 | 753.5  | 0.00128  | 743.9  | 0.00257 | 756.72  | 6.48E-04 | 825.88  | 0.01945 | 1107.855  | 8.28E-07 |
| 716.7025 | 8.61E-04 | 753.65 | 0.00132  | 744.03 | 0.00256 | 756.884 | 6.70E-04 | 826.136 | 0.01965 | 1108.2185 | 9.65E-07 |
| 716.83   | 8.62E-04 | 753.8  | 0.00136  | 744.16 | 0.00254 | 757.048 | 6.92E-04 | 826.392 | 0.01984 | 1108.582  | 1.12E-06 |
| 716.9575 | 8.64E-04 | 753.95 | 0.0014   | 744.29 | 0.00253 | 757.212 | 7.16E-04 | 826.648 | 0.02002 | 1108.9455 | 1.30E-06 |
| 717.085  | 8.65E-04 | 754.1  | 0.00144  | 744.42 | 0.00251 | 757.376 | 7.40E-04 | 826.904 | 0.02018 | 1109.309  | 1.51E-06 |
| 717.2125 | 8.66E-04 | 754.25 | 0.00148  | 744.55 | 0.00249 | 757.54  | 7.65E-04 | 827.16  | 0.02034 | 1109.6725 | 1.75E-06 |
| 717.34   | 8.67E-04 | 754.4  | 0.00152  | 744.68 | 0.00248 | 757.704 | 7.92E-04 | 827.416 | 0.02048 | 1110.036  | 2.03E-06 |
| 717.4675 | 8.69E-04 | 754.55 | 0.00157  | 744.81 | 0.00246 | 757.868 | 8.19E-04 | 827.672 | 0.02061 | 1110.3995 | 2.34E-06 |
| 717.595  | 8.70E-04 | 754.7  | 0.00161  | 744.94 | 0.00244 | 758.032 | 8.47E-04 | 827.928 | 0.02072 | 1110.763  | 2.70E-06 |
| 717.7225 | 8.71E-04 | 754.85 | 0.00166  | 745.07 | 0.00242 | 758.196 | 8.76E-04 | 828.184 | 0.02083 | 1111.1265 | 3.12E-06 |
| 717.85   | 8.71E-04 | 755    | 0.0017   | 745.2  | 0.00241 | 758.36  | 9.06E-04 | 828.44  | 0.02092 | 1111.49   | 3.59E-06 |
| 717.9775 | 8.72E-04 | 755.15 | 0.00175  | 745.33 | 0.00239 | 758.524 | 9.38E-04 | 828.696 | 0.02099 | 1111.8535 | 4.12E-06 |
| 718.105  | 8.73E-04 | 755.3  | 0.0018   | 745.46 | 0.00237 | 758.688 | 9.70E-04 | 828.952 | 0.02106 | 1112.217  | 4.73E-06 |
| 718.2325 | 8.74E-04 | 755.45 | 0.00185  | 745.59 | 0.00235 | 758.852 | 0.001    | 829.208 | 0.02111 | 1112.5805 | 5.43E-06 |
| 718.36   | 8.74E-04 | 755.6  | 0.0019   | 745.72 | 0.00233 | 759.016 | 0.00104  | 829.464 | 0.02114 | 1112.944  | 6.21E-06 |
| 718.4875 | 8.75E-04 | 755.75 | 0.00195  | 745.85 | 0.00231 | 759.18  | 0.00107  | 829.72  | 0.02116 | 1113.3075 | 7.11E-06 |
| 718.615  | 8.75E-04 | 755.9  | 0.002    | 745.98 | 0.0023  | 759.344 | 0.00111  | 829.976 | 0.02117 | 1113.671  | 8.11E-06 |
| 718.7425 | 8.75E-04 | 756.05 | 0.00206  | 746.11 | 0.00228 | 759.508 | 0.00115  | 830.232 | 0.02117 | 1114.0345 | 9.25E-06 |
| 718.87   | 8.76E-04 | 756.2  | 0.00211  | 746.24 | 0.00226 | 759.672 | 0.00119  | 830.488 | 0.02115 | 1114.398  | 1.05E-05 |
| 718.9975 | 8.76E-04 | 756.35 | 0.00217  | 746.37 | 0.00224 | 759.836 | 0.00123  | 830.744 | 0.02111 | 1114.7615 | 1.20E-05 |
| 719.125  | 8.76E-04 | 756.5  | 0.00222  | 746.5  | 0.00222 | 760     | 0.00127  | 831     | 0.02107 | 1115.125  | 1.36E-05 |
| 719.2525 | 8.76E-04 | 756.65 | 0.00228  | 746.63 | 0.0022  | 760.164 | 0.00131  | 831.256 | 0.02101 | 1115.4885 | 1.54E-05 |
| 719.38   | 8.76E-04 | 756.8  | 0.00234  | 746.76 | 0.00218 | 760.328 | 0.00135  | 831.512 | 0.02093 | 1115.852  | 1.75E-05 |
| 719.5075 | 8.76E-04 | 756.95 | 0.0024   | 746.89 | 0.00216 | 760.492 | 0.0014   | 831.768 | 0.02085 | 1116.2155 | 1.98E-05 |
| 719.635  | 8.75E-04 | 757.1  | 0.00246  | 747.02 | 0.00214 | 760.656 | 0.00144  | 832.024 | 0.02074 | 1116.579  | 2.24E-05 |
| 719.7625 | 8.75E-04 | 757.25 | 0.00252  | 747.15 | 0.00212 | 760.82  | 0.00149  | 832.28  | 0.02063 | 1116.9425 | 2.52E-05 |
| 719.89   | 8.75E-04 | 757.4  | 0.00258  | 747.28 | 0.0021  | 760.984 | 0.00154  | 832.536 | 0.0205  | 1117.306  | 2.85E-05 |
| 720.0175 | 8.74E-04 | 757.55 | 0.00265  | 747.41 | 0.00208 | 761.148 | 0.00159  | 832.792 | 0.02036 | 1117.6695 | 3.20E-05 |
| 720.145  | 8.74E-04 | 757.7  | 0.00271  | 747.54 | 0.00206 | 761.312 | 0.00164  | 833.048 | 0.02021 | 1118.033  | 3.60E-05 |
| 720.2725 | 8.73E-04 | 757.85 | 0.00278  | 747.67 | 0.00204 | 761.476 | 0.00169  | 833.304 | 0.02005 | 1118.3965 | 4.04E-05 |
| 720.4    | 8.72E-04 | 758    | 0.00285  | 747.8  | 0.00202 | 761.64  | 0.00175  | 833.56  | 0.01987 | 1118.76   | 4.53E-05 |

|          |          |        |         |        |         |         |         |         |         |           |          |
|----------|----------|--------|---------|--------|---------|---------|---------|---------|---------|-----------|----------|
| 720.5275 | 8.71E-04 | 758.15 | 0.00291 | 747.93 | 0.002   | 761.804 | 0.0018  | 833.816 | 0.01969 | 1119.1235 | 5.07E-05 |
| 720.655  | 8.71E-04 | 758.3  | 0.00298 | 748.06 | 0.00198 | 761.968 | 0.00186 | 834.072 | 0.01949 | 1119.487  | 5.67E-05 |
| 720.7825 | 8.70E-04 | 758.45 | 0.00305 | 748.19 | 0.00195 | 762.132 | 0.00192 | 834.328 | 0.01928 | 1119.8505 | 6.33E-05 |
| 720.91   | 8.69E-04 | 758.6  | 0.00313 | 748.32 | 0.00193 | 762.296 | 0.00198 | 834.584 | 0.01906 | 1120.214  | 7.06E-05 |
| 721.0375 | 8.67E-04 | 758.75 | 0.0032  | 748.45 | 0.00191 | 762.46  | 0.00204 | 834.84  | 0.01883 | 1120.5775 | 7.86E-05 |
| 721.165  | 8.66E-04 | 758.9  | 0.00327 | 748.58 | 0.00189 | 762.624 | 0.0021  | 835.096 | 0.0186  | 1120.941  | 8.74E-05 |
| 721.2925 | 8.65E-04 | 759.05 | 0.00334 | 748.71 | 0.00187 | 762.788 | 0.00216 | 835.352 | 0.01835 | 1121.3045 | 9.71E-05 |
| 721.42   | 8.63E-04 | 759.2  | 0.00342 | 748.84 | 0.00185 | 762.952 | 0.00222 | 835.608 | 0.01809 | 1121.668  | 1.08E-04 |
| 721.5475 | 8.62E-04 | 759.35 | 0.0035  | 748.97 | 0.00183 | 763.116 | 0.00229 | 835.864 | 0.01783 | 1122.0315 | 1.19E-04 |
| 721.675  | 8.60E-04 | 759.5  | 0.00357 | 749.1  | 0.00181 | 763.28  | 0.00236 | 836.12  | 0.01756 | 1122.395  | 1.32E-04 |
| 721.8025 | 8.59E-04 | 759.65 | 0.00365 | 749.23 | 0.00179 | 763.444 | 0.00243 | 836.376 | 0.01728 | 1122.7585 | 1.46E-04 |
| 721.93   | 8.57E-04 | 759.8  | 0.00373 | 749.36 | 0.00177 | 763.608 | 0.0025  | 836.632 | 0.017   | 1123.122  | 1.61E-04 |
| 722.0575 | 8.55E-04 | 759.95 | 0.00381 | 749.49 | 0.00174 | 763.772 | 0.00257 | 836.888 | 0.01671 | 1123.4855 | 1.77E-04 |
| 722.185  | 8.53E-04 | 760.1  | 0.00389 | 749.62 | 0.00172 | 763.936 | 0.00264 | 837.144 | 0.01641 | 1123.849  | 1.95E-04 |
| 722.3125 | 8.51E-04 | 760.25 | 0.00397 | 749.75 | 0.0017  | 764.1   | 0.00271 | 837.4   | 0.01611 | 1124.2125 | 2.14E-04 |
| 722.44   | 8.49E-04 | 760.4  | 0.00405 | 749.88 | 0.00168 | 764.264 | 0.00279 | 837.656 | 0.0158  | 1124.576  | 2.35E-04 |
| 722.5675 | 8.47E-04 | 760.55 | 0.00413 | 750.01 | 0.00166 | 764.428 | 0.00287 | 837.912 | 0.01549 | 1124.9395 | 2.58E-04 |
| 722.695  | 8.45E-04 | 760.7  | 0.00422 | 750.14 | 0.00164 | 764.592 | 0.00294 | 838.168 | 0.01517 | 1125.303  | 2.82E-04 |
| 722.8225 | 8.43E-04 | 760.85 | 0.0043  | 750.27 | 0.00162 | 764.756 | 0.00302 | 838.424 | 0.01486 | 1125.6665 | 3.09E-04 |
| 722.95   | 8.41E-04 | 761    | 0.00439 | 750.4  | 0.0016  | 764.92  | 0.0031  | 838.68  | 0.01454 | 1126.03   | 3.37E-04 |
| 723.0775 | 8.38E-04 | 761.15 | 0.00447 | 750.53 | 0.00158 | 765.084 | 0.00319 | 838.936 | 0.01421 | 1126.3935 | 3.67E-04 |
| 723.205  | 8.36E-04 | 761.3  | 0.00456 | 750.66 | 0.00156 | 765.248 | 0.00327 | 839.192 | 0.01389 | 1126.757  | 4.00E-04 |
| 723.3325 | 8.33E-04 | 761.45 | 0.00465 | 750.79 | 0.00154 | 765.412 | 0.00336 | 839.448 | 0.01356 | 1127.1205 | 4.35E-04 |
| 723.46   | 8.30E-04 | 761.6  | 0.00473 | 750.92 | 0.00152 | 765.576 | 0.00344 | 839.704 | 0.01323 | 1127.484  | 4.72E-04 |
| 723.5875 | 8.28E-04 | 761.75 | 0.00482 | 751.05 | 0.0015  | 765.74  | 0.00353 | 839.96  | 0.01291 | 1127.8475 | 5.12E-04 |
| 723.715  | 8.25E-04 | 761.9  | 0.00491 | 751.18 | 0.00148 | 765.904 | 0.00362 | 840.216 | 0.01258 | 1128.211  | 5.55E-04 |
| 723.8425 | 8.22E-04 | 762.05 | 0.005   | 751.31 | 0.00146 | 766.068 | 0.00371 | 840.472 | 0.01225 | 1128.5745 | 6.00E-04 |
| 723.97   | 8.19E-04 | 762.2  | 0.00509 | 751.44 | 0.00143 | 766.232 | 0.0038  | 840.728 | 0.01193 | 1128.938  | 6.48E-04 |
| 724.0975 | 8.16E-04 | 762.35 | 0.00518 | 751.57 | 0.00141 | 766.396 | 0.00389 | 840.984 | 0.0116  | 1129.3015 | 7.00E-04 |
| 724.225  | 8.13E-04 | 762.5  | 0.00527 | 751.7  | 0.00139 | 766.56  | 0.00398 | 841.24  | 0.01128 | 1129.665  | 7.54E-04 |
| 724.3525 | 8.10E-04 | 762.65 | 0.00536 | 751.83 | 0.00138 | 766.724 | 0.00408 | 841.496 | 0.01096 | 1130.0285 | 8.11E-04 |
| 724.48   | 8.07E-04 | 762.8  | 0.00545 | 751.96 | 0.00136 | 766.888 | 0.00417 | 841.752 | 0.01064 | 1130.392  | 8.72E-04 |
| 724.6075 | 8.03E-04 | 762.95 | 0.00554 | 752.09 | 0.00134 | 767.052 | 0.00427 | 842.008 | 0.01032 | 1130.7555 | 9.35E-04 |
| 724.735  | 8.00E-04 | 763.1  | 0.00563 | 752.22 | 0.00132 | 767.216 | 0.00437 | 842.264 | 0.01001 | 1131.119  | 0.001    |
| 724.8625 | 7.97E-04 | 763.25 | 0.00573 | 752.35 | 0.0013  | 767.38  | 0.00447 | 842.52  | 0.0097  | 1131.4825 | 0.00107  |
| 724.99   | 7.93E-04 | 763.4  | 0.00582 | 752.48 | 0.00128 | 767.544 | 0.00457 | 842.776 | 0.0094  | 1131.846  | 0.00115  |
| 725.1175 | 7.89E-04 | 763.55 | 0.00591 | 752.61 | 0.00126 | 767.708 | 0.00467 | 843.032 | 0.0091  | 1132.2095 | 0.00122  |
| 725.245  | 7.86E-04 | 763.7  | 0.006   | 752.74 | 0.00124 | 767.872 | 0.00477 | 843.288 | 0.0088  | 1132.573  | 0.00131  |
| 725.3725 | 7.82E-04 | 763.85 | 0.0061  | 752.87 | 0.00122 | 768.036 | 0.00488 | 843.544 | 0.00851 | 1132.9365 | 0.00139  |
| 725.5    | 7.78E-04 | 764    | 0.00619 | 753    | 0.0012  | 768.2   | 0.00498 | 843.8   | 0.00822 | 1133.3    | 0.00148  |
| 725.6275 | 7.75E-04 | 764.15 | 0.00628 | 753.13 | 0.00118 | 768.364 | 0.00508 | 844.056 | 0.00794 | 1133.6635 | 0.00157  |
| 725.755  | 7.71E-04 | 764.3  | 0.00637 | 753.26 | 0.00116 | 768.528 | 0.00519 | 844.312 | 0.00766 | 1134.027  | 0.00166  |
| 725.8825 | 7.67E-04 | 764.45 | 0.00647 | 753.39 | 0.00115 | 768.692 | 0.0053  | 844.568 | 0.00739 | 1134.3905 | 0.00176  |
| 726.01   | 7.63E-04 | 764.6  | 0.00656 | 753.52 | 0.00113 | 768.856 | 0.0054  | 844.824 | 0.00712 | 1134.754  | 0.00186  |
| 726.1375 | 7.59E-04 | 764.75 | 0.00665 | 753.65 | 0.00111 | 769.02  | 0.00551 | 845.08  | 0.00686 | 1135.1175 | 0.00197  |
| 726.265  | 7.54E-04 | 764.9  | 0.00674 | 753.78 | 0.00109 | 769.184 | 0.00562 | 845.336 | 0.00661 | 1135.481  | 0.00208  |
| 726.3925 | 7.50E-04 | 765.05 | 0.00684 | 753.91 | 0.00107 | 769.348 | 0.00573 | 845.592 | 0.00636 | 1135.8445 | 0.00219  |
| 726.52   | 7.46E-04 | 765.2  | 0.00693 | 754.04 | 0.00106 | 769.512 | 0.00584 | 845.848 | 0.00612 | 1136.208  | 0.0023   |
| 726.6475 | 7.42E-04 | 765.35 | 0.00702 | 754.17 | 0.00104 | 769.676 | 0.00595 | 846.104 | 0.00589 | 1136.5715 | 0.00242  |
| 726.775  | 7.37E-04 | 765.5  | 0.00711 | 754.3  | 0.00102 | 769.84  | 0.00606 | 846.36  | 0.00566 | 1136.935  | 0.00254  |
| 726.9025 | 7.33E-04 | 765.65 | 0.0072  | 754.43 | 0.00101 | 770.004 | 0.00617 | 846.616 | 0.00544 | 1137.2985 | 0.00266  |

|          |          |        |         |        |          |         |         |         |         |           |         |
|----------|----------|--------|---------|--------|----------|---------|---------|---------|---------|-----------|---------|
| 727.03   | 7.28E-04 | 765.8  | 0.00729 | 754.56 | 9.88E-04 | 770.168 | 0.00628 | 846.872 | 0.00522 | 1137.662  | 0.00278 |
| 727.1575 | 7.24E-04 | 765.95 | 0.00738 | 754.69 | 9.72E-04 | 770.332 | 0.00639 | 847.128 | 0.00502 | 1138.0255 | 0.00291 |
| 727.285  | 7.19E-04 | 766.1  | 0.00747 | 754.82 | 9.55E-04 | 770.496 | 0.00651 | 847.384 | 0.00481 | 1138.389  | 0.00304 |
| 727.4125 | 7.15E-04 | 766.25 | 0.00756 | 754.95 | 9.39E-04 | 770.66  | 0.00662 | 847.64  | 0.00462 | 1138.7525 | 0.00317 |
| 727.54   | 7.10E-04 | 766.4  | 0.00764 | 755.08 | 9.23E-04 | 770.824 | 0.00673 | 847.896 | 0.00443 | 1139.116  | 0.0033  |
| 727.6675 | 7.05E-04 | 766.55 | 0.00773 | 755.21 | 9.07E-04 | 770.988 | 0.00684 | 848.152 | 0.00425 | 1139.4795 | 0.00343 |
| 727.795  | 7.00E-04 | 766.7  | 0.00782 | 755.34 | 8.91E-04 | 771.152 | 0.00695 | 848.408 | 0.00408 | 1139.843  | 0.00356 |
| 727.9225 | 6.95E-04 | 766.85 | 0.0079  | 755.47 | 8.75E-04 | 771.316 | 0.00707 | 848.664 | 0.00391 | 1140.2065 | 0.00369 |
| 728.05   | 6.91E-04 | 767    | 0.00799 | 755.6  | 8.60E-04 | 771.48  | 0.00718 | 848.92  | 0.00375 | 1140.57   | 0.00382 |
| 728.1775 | 6.86E-04 | 767.15 | 0.00807 | 755.73 | 8.44E-04 | 771.644 | 0.00729 | 849.176 | 0.0036  | 1140.9335 | 0.00395 |
| 728.305  | 6.81E-04 | 767.3  | 0.00815 | 755.86 | 8.29E-04 | 771.808 | 0.0074  | 849.432 | 0.00345 | 1141.297  | 0.00408 |
| 728.4325 | 6.76E-04 | 767.45 | 0.00823 | 755.99 | 8.14E-04 | 771.972 | 0.00751 | 849.688 | 0.00331 | 1141.6605 | 0.00421 |
| 728.56   | 6.71E-04 | 767.6  | 0.00831 | 756.12 | 8.00E-04 | 772.136 | 0.00763 | 849.944 | 0.00318 | 1142.024  | 0.00434 |
| 728.6875 | 6.65E-04 | 767.75 | 0.00839 | 756.25 | 7.85E-04 | 772.3   | 0.00774 | 850.2   | 0.00305 | 1142.3875 | 0.00446 |
| 728.815  | 6.60E-04 | 767.9  | 0.00847 | 756.38 | 7.71E-04 | 772.464 | 0.00785 | 850.456 | 0.00293 | 1142.751  | 0.00458 |
| 728.9425 | 6.55E-04 | 768.05 | 0.00855 | 756.51 | 7.57E-04 | 772.628 | 0.00796 | 850.712 | 0.00282 | 1143.1145 | 0.0047  |
| 729.07   | 6.50E-04 | 768.2  | 0.00862 | 756.64 | 7.43E-04 | 772.792 | 0.00806 | 850.968 | 0.00271 | 1143.478  | 0.00482 |
| 729.1975 | 6.45E-04 | 768.35 | 0.0087  | 756.77 | 7.29E-04 | 772.956 | 0.00817 | 851.224 | 0.00261 | 1143.8415 | 0.00493 |
| 729.325  | 6.39E-04 | 768.5  | 0.00877 | 756.9  | 7.15E-04 | 773.12  | 0.00828 | 851.48  | 0.00251 | 1144.205  | 0.00504 |
| 729.4525 | 6.34E-04 | 768.65 | 0.00884 | 757.03 | 7.02E-04 | 773.284 | 0.00839 | 851.736 | 0.00242 | 1144.5685 | 0.00515 |
| 729.58   | 6.29E-04 | 768.8  | 0.00891 | 757.16 | 6.89E-04 | 773.448 | 0.00849 | 851.992 | 0.00234 | 1144.932  | 0.00525 |
| 729.7075 | 6.23E-04 | 768.95 | 0.00898 | 757.29 | 6.76E-04 | 773.612 | 0.0086  | 852.248 | 0.00227 | 1145.2955 | 0.00534 |
| 729.835  | 6.18E-04 | 769.1  | 0.00905 | 757.42 | 6.63E-04 | 773.776 | 0.0087  | 852.504 | 0.0022  | 1145.659  | 0.00543 |
| 729.9625 | 6.13E-04 | 769.25 | 0.00911 | 757.55 | 6.50E-04 | 773.94  | 0.0088  | 852.76  | 0.00213 | 1146.0225 | 0.00551 |
| 730.09   | 6.07E-04 | 769.4  | 0.00918 | 757.68 | 6.38E-04 | 774.104 | 0.0089  | 853.016 | 0.00207 | 1146.386  | 0.00559 |
| 730.2175 | 6.02E-04 | 769.55 | 0.00924 | 757.81 | 6.25E-04 | 774.268 | 0.009   | 853.272 | 0.00202 | 1146.7495 | 0.00566 |
| 730.345  | 5.96E-04 | 769.7  | 0.0093  | 757.94 | 6.13E-04 | 774.432 | 0.0091  | 853.528 | 0.00197 | 1147.113  | 0.00573 |
| 730.4725 | 5.91E-04 | 769.85 | 0.00936 | 758.07 | 6.01E-04 | 774.596 | 0.0092  | 853.784 | 0.00193 | 1147.4765 | 0.00579 |
| 730.6    | 5.85E-04 | 770    | 0.00942 | 758.2  | 5.90E-04 | 774.76  | 0.0093  | 854.04  | 0.00189 | 1147.84   | 0.00584 |
| 730.7275 | 5.80E-04 | 770.15 | 0.00947 | 758.33 | 5.78E-04 | 774.924 | 0.00939 | 854.296 | 0.00186 | 1148.2035 | 0.00588 |
| 730.855  | 5.74E-04 | 770.3  | 0.00953 | 758.46 | 5.67E-04 | 775.088 | 0.00948 | 854.552 | 0.00183 | 1148.567  | 0.00592 |
| 730.9825 | 5.68E-04 | 770.45 | 0.00958 | 758.59 | 5.56E-04 | 775.252 | 0.00957 | 854.808 | 0.00181 | 1148.9305 | 0.00595 |
| 731.11   | 5.63E-04 | 770.6  | 0.00963 | 758.72 | 5.45E-04 | 775.416 | 0.00966 | 855.064 | 0.0018  | 1149.294  | 0.00597 |
| 731.2375 | 5.57E-04 | 770.75 | 0.00968 | 758.85 | 5.34E-04 | 775.58  | 0.00975 | 855.32  | 0.00179 | 1149.6575 | 0.00599 |
| 731.365  | 5.51E-04 | 770.9  | 0.00972 | 758.98 | 5.23E-04 | 775.744 | 0.00984 | 855.576 | 0.00178 | 1150.021  | 0.006   |
| 731.4925 | 5.46E-04 | 771.05 | 0.00977 | 759.11 | 5.13E-04 | 775.908 | 0.00992 | 855.832 | 0.00178 | 1150.3845 | 0.006   |
| 731.62   | 5.40E-04 | 771.2  | 0.00981 | 759.24 | 5.02E-04 | 776.072 | 0.01    | 856.088 | 0.00178 | 1150.748  | 0.00599 |
| 731.7475 | 5.35E-04 | 771.35 | 0.00985 | 759.37 | 4.92E-04 | 776.236 | 0.01008 | 856.344 | 0.00179 | 1151.1115 | 0.00598 |
| 731.875  | 5.29E-04 | 771.5  | 0.00989 | 759.5  | 4.82E-04 | 776.4   | 0.01016 | 856.6   | 0.0018  | 1151.475  | 0.00596 |
| 732.0025 | 5.23E-04 | 771.65 | 0.00992 | 759.63 | 4.72E-04 | 776.564 | 0.01024 | 856.856 | 0.00182 | 1151.8385 | 0.00593 |
| 732.13   | 5.17E-04 | 771.8  | 0.00996 | 759.76 | 4.63E-04 | 776.728 | 0.01031 | 857.112 | 0.00184 | 1152.202  | 0.0059  |
| 732.2575 | 5.12E-04 | 771.95 | 0.00999 | 759.89 | 4.53E-04 | 776.892 | 0.01038 | 857.368 | 0.00186 | 1152.5655 | 0.00586 |
| 732.385  | 5.06E-04 | 772.1  | 0.01002 | 760.02 | 4.44E-04 | 777.056 | 0.01045 | 857.624 | 0.00189 | 1152.929  | 0.00582 |
| 732.5125 | 5.00E-04 | 772.25 | 0.01005 | 760.15 | 4.35E-04 | 777.22  | 0.01052 | 857.88  | 0.00192 | 1153.2925 | 0.00577 |
| 732.64   | 4.95E-04 | 772.4  | 0.01007 | 760.28 | 4.26E-04 | 777.384 | 0.01058 | 858.136 | 0.00196 | 1153.656  | 0.00571 |
| 732.7675 | 4.89E-04 | 772.55 | 0.0101  | 760.41 | 4.17E-04 | 777.548 | 0.01064 | 858.392 | 0.002   | 1154.0195 | 0.00565 |
| 732.895  | 4.83E-04 | 772.7  | 0.01012 | 760.54 | 4.08E-04 | 777.712 | 0.0107  | 858.648 | 0.00204 | 1154.383  | 0.00559 |
| 733.0225 | 4.78E-04 | 772.85 | 0.01013 | 760.67 | 4.00E-04 | 777.876 | 0.01076 | 858.904 | 0.00209 | 1154.7465 | 0.00552 |
| 733.15   | 4.72E-04 | 773    | 0.01015 | 760.8  | 3.92E-04 | 778.04  | 0.01081 | 859.16  | 0.00214 | 1155.11   | 0.00545 |
| 733.2775 | 4.66E-04 | 773.15 | 0.01017 | 760.93 | 3.83E-04 | 778.204 | 0.01086 | 859.416 | 0.00219 | 1155.4735 | 0.00537 |
| 733.405  | 4.61E-04 | 773.3  | 0.01018 | 761.06 | 3.75E-04 | 778.368 | 0.01091 | 859.672 | 0.00225 | 1155.837  | 0.0053  |

|          |          |        |         |        |          |         |         |         |         |           |         |
|----------|----------|--------|---------|--------|----------|---------|---------|---------|---------|-----------|---------|
| 733.5325 | 4.55E-04 | 773.45 | 0.01019 | 761.19 | 3.68E-04 | 778.532 | 0.01096 | 859.928 | 0.00231 | 1156.2005 | 0.00522 |
| 733.66   | 4.49E-04 | 773.6  | 0.01019 | 761.32 | 3.60E-04 | 778.696 | 0.011   | 860.184 | 0.00237 | 1156.564  | 0.00514 |
| 733.7875 | 4.44E-04 | 773.75 | 0.0102  | 761.45 | 3.52E-04 | 778.86  | 0.01104 | 860.44  | 0.00243 | 1156.9275 | 0.00507 |
| 733.915  | 4.38E-04 | 773.9  | 0.0102  | 761.58 | 3.45E-04 | 779.024 | 0.01108 | 860.696 | 0.0025  | 1157.291  | 0.00499 |
| 734.0425 | 4.32E-04 | 774.05 | 0.0102  | 761.71 | 3.37E-04 | 779.188 | 0.01111 | 860.952 | 0.00257 | 1157.6545 | 0.00491 |
| 734.17   | 4.27E-04 | 774.2  | 0.0102  | 761.84 | 3.30E-04 | 779.352 | 0.01114 | 861.208 | 0.00265 | 1158.018  | 0.00484 |
| 734.2975 | 4.21E-04 | 774.35 | 0.0102  | 761.97 | 3.23E-04 | 779.516 | 0.01117 | 861.464 | 0.00272 | 1158.3815 | 0.00476 |
| 734.425  | 4.16E-04 | 774.5  | 0.01019 | 762.1  | 3.16E-04 | 779.68  | 0.0112  | 861.72  | 0.0028  | 1158.745  | 0.0047  |
| 734.5525 | 4.10E-04 | 774.65 | 0.01018 | 762.23 | 3.10E-04 | 779.844 | 0.01122 | 861.976 | 0.00288 | 1159.1085 | 0.00463 |
| 734.68   | 4.05E-04 | 774.8  | 0.01017 | 762.36 | 3.03E-04 | 780.008 | 0.01124 | 862.232 | 0.00296 | 1159.472  | 0.00457 |
| 734.8075 | 3.99E-04 | 774.95 | 0.01016 | 762.49 | 2.96E-04 | 780.172 | 0.01126 | 862.488 | 0.00305 | 1159.8355 | 0.00452 |
| 734.935  | 3.94E-04 | 775.1  | 0.01014 | 762.62 | 2.90E-04 | 780.336 | 0.01127 | 862.744 | 0.00314 | 1160.199  | 0.00447 |
| 735.0625 | 3.88E-04 | 775.25 | 0.01012 | 762.75 | 2.84E-04 | 780.5   | 0.01128 | 863     | 0.00322 | 1160.5625 | 0.00443 |
| 735.19   | 3.83E-04 | 775.4  | 0.0101  | 762.88 | 2.78E-04 | 780.664 | 0.01129 | 863.256 | 0.00331 | 1160.926  | 0.0044  |
| 735.3175 | 3.77E-04 | 775.55 | 0.01008 | 763.01 | 2.72E-04 | 780.828 | 0.01129 | 863.512 | 0.0034  | 1161.2895 | 0.00437 |
| 735.445  | 3.72E-04 | 775.7  | 0.01006 | 763.14 | 2.66E-04 | 780.992 | 0.01129 | 863.768 | 0.00349 | 1161.653  | 0.00436 |
| 735.5725 | 3.67E-04 | 775.85 | 0.01003 | 763.27 | 2.60E-04 | 781.156 | 0.01129 | 864.024 | 0.00359 | 1162.0165 | 0.00435 |
| 735.7    | 3.61E-04 | 776    | 0.01    | 763.4  | 2.54E-04 | 781.32  | 0.01129 | 864.28  | 0.00368 | 1162.38   | 0.00436 |
| 735.8275 | 3.56E-04 | 776.15 | 0.00997 | 763.53 | 2.49E-04 | 781.484 | 0.01128 | 864.536 | 0.00378 | 1162.7435 | 0.00437 |
| 735.955  | 3.51E-04 | 776.3  | 0.00994 | 763.66 | 2.44E-04 | 781.648 | 0.01127 | 864.792 | 0.00387 | 1163.107  | 0.0044  |
| 736.0825 | 3.45E-04 | 776.45 | 0.0099  | 763.79 | 2.38E-04 | 781.812 | 0.01126 | 865.048 | 0.00397 | 1163.4705 | 0.00445 |
| 736.21   | 3.40E-04 | 776.6  | 0.00986 | 763.92 | 2.33E-04 | 781.976 | 0.01124 | 865.304 | 0.00406 | 1163.834  | 0.0045  |
| 736.3375 | 3.35E-04 | 776.75 | 0.00982 | 764.05 | 2.28E-04 | 782.14  | 0.01122 | 865.56  | 0.00416 | 1164.1975 | 0.00457 |
| 736.465  | 3.30E-04 | 776.9  | 0.00978 | 764.18 | 2.23E-04 | 782.304 | 0.0112  | 865.816 | 0.00425 | 1164.561  | 0.00466 |
| 736.5925 | 3.25E-04 | 777.05 | 0.00974 | 764.31 | 2.18E-04 | 782.468 | 0.01117 | 866.072 | 0.00435 | 1164.9245 | 0.00476 |
| 736.72   | 3.20E-04 | 777.2  | 0.00969 | 764.44 | 2.13E-04 | 782.632 | 0.01114 | 866.328 | 0.00445 | 1165.288  | 0.00488 |
| 736.8475 | 3.15E-04 | 777.35 | 0.00965 | 764.57 | 2.09E-04 | 782.796 | 0.01111 | 866.584 | 0.00454 | 1165.6515 | 0.00501 |
| 736.975  | 3.10E-04 | 777.5  | 0.0096  | 764.7  | 2.04E-04 | 782.96  | 0.01108 | 866.84  | 0.00464 | 1166.015  | 0.00516 |
| 737.1025 | 3.05E-04 | 777.65 | 0.00954 | 764.83 | 2.00E-04 | 783.124 | 0.01104 | 867.096 | 0.00473 | 1166.3785 | 0.00533 |
| 737.23   | 3.00E-04 | 777.8  | 0.00949 | 764.96 | 1.95E-04 | 783.288 | 0.011   | 867.352 | 0.00482 | 1166.742  | 0.00551 |
| 737.3575 | 2.95E-04 | 777.95 | 0.00944 | 765.09 | 1.91E-04 | 783.452 | 0.01096 | 867.608 | 0.00491 | 1167.1055 | 0.00572 |
| 737.485  | 2.90E-04 | 778.1  | 0.00938 | 765.22 | 1.87E-04 | 783.616 | 0.01091 | 867.864 | 0.005   | 1167.469  | 0.00594 |
| 737.6125 | 2.85E-04 | 778.25 | 0.00932 | 765.35 | 1.83E-04 | 783.78  | 0.01087 | 868.12  | 0.00509 | 1167.8325 | 0.00618 |
| 737.74   | 2.81E-04 | 778.4  | 0.00926 | 765.48 | 1.79E-04 | 783.944 | 0.01082 | 868.376 | 0.00518 | 1168.196  | 0.00643 |
| 737.8675 | 2.76E-04 | 778.55 | 0.0092  | 765.61 | 1.75E-04 | 784.108 | 0.01076 | 868.632 | 0.00526 | 1168.5595 | 0.00671 |
| 737.995  | 2.71E-04 | 778.7  | 0.00914 | 765.74 | 1.71E-04 | 784.272 | 0.01071 | 868.888 | 0.00535 | 1168.923  | 0.00701 |
| 738.1225 | 2.66E-04 | 778.85 | 0.00907 | 765.87 | 1.67E-04 | 784.436 | 0.01065 | 869.144 | 0.00543 | 1169.2865 | 0.00732 |
| 738.25   | 2.62E-04 | 779    | 0.009   | 766    | 1.63E-04 | 784.6   | 0.01059 | 869.4   | 0.00551 | 1169.65   | 0.00765 |
| 738.3775 | 2.57E-04 | 779.15 | 0.00893 | 766.13 | 1.60E-04 | 784.764 | 0.01052 | 869.656 | 0.00559 | 1170.0135 | 0.008   |
| 738.505  | 2.53E-04 | 779.3  | 0.00887 | 766.26 | 1.56E-04 | 784.928 | 0.01046 | 869.912 | 0.00566 | 1170.377  | 0.00837 |
| 738.6325 | 2.48E-04 | 779.45 | 0.00879 | 766.39 | 1.53E-04 | 785.092 | 0.01039 | 870.168 | 0.00573 | 1170.7405 | 0.00876 |
| 738.76   | 2.44E-04 | 779.6  | 0.00872 | 766.52 | 1.49E-04 | 785.256 | 0.01032 | 870.424 | 0.0058  | 1171.104  | 0.00916 |
| 738.8875 | 2.39E-04 | 779.75 | 0.00865 | 766.65 | 1.46E-04 | 785.42  | 0.01024 | 870.68  | 0.00587 | 1171.4675 | 0.00958 |
| 739.015  | 2.35E-04 | 779.9  | 0.00857 | 766.78 | 1.43E-04 | 785.584 | 0.01017 | 870.936 | 0.00593 | 1171.831  | 0.01002 |
| 739.1425 | 2.31E-04 | 780.05 | 0.0085  | 766.91 | 1.40E-04 | 785.748 | 0.01009 | 871.192 | 0.00599 | 1172.1945 | 0.01047 |
| 739.27   | 2.27E-04 | 780.2  | 0.00842 | 767.04 | 1.37E-04 | 785.912 | 0.01001 | 871.448 | 0.00604 | 1172.558  | 0.01094 |
| 739.3975 | 2.22E-04 | 780.35 | 0.00834 | 767.17 | 1.34E-04 | 786.076 | 0.00993 | 871.704 | 0.0061  | 1172.9215 | 0.01142 |
| 739.525  | 2.18E-04 | 780.5  | 0.00826 | 767.3  | 1.31E-04 | 786.24  | 0.00985 | 871.96  | 0.00615 | 1173.285  | 0.01191 |
| 739.6525 | 2.14E-04 | 780.65 | 0.00818 | 767.43 | 1.28E-04 | 786.404 | 0.00976 | 872.216 | 0.00619 | 1173.6485 | 0.01241 |
| 739.78   | 2.10E-04 | 780.8  | 0.0081  | 767.56 | 1.25E-04 | 786.568 | 0.00967 | 872.472 | 0.00623 | 1174.012  | 0.01293 |
| 739.9075 | 2.06E-04 | 780.95 | 0.00801 | 767.69 | 1.22E-04 | 786.732 | 0.00958 | 872.728 | 0.00627 | 1174.3755 | 0.01345 |

|          |          |        |         |        |          |         |         |         |         |           |         |
|----------|----------|--------|---------|--------|----------|---------|---------|---------|---------|-----------|---------|
| 740.035  | 2.02E-04 | 781.1  | 0.00793 | 767.82 | 1.19E-04 | 786.896 | 0.00949 | 872.984 | 0.00631 | 1174.739  | 0.01399 |
| 740.1625 | 1.98E-04 | 781.25 | 0.00784 | 767.95 | 1.17E-04 | 787.06  | 0.0094  | 873.24  | 0.00634 | 1175.1025 | 0.01452 |
| 740.29   | 1.94E-04 | 781.4  | 0.00776 | 768.08 | 1.14E-04 | 787.224 | 0.00931 | 873.496 | 0.00636 | 1175.466  | 0.01507 |
| 740.4175 | 1.90E-04 | 781.55 | 0.00767 | 768.21 | 1.11E-04 | 787.388 | 0.00921 | 873.752 | 0.00638 | 1175.8295 | 0.01562 |
| 740.545  | 1.87E-04 | 781.7  | 0.00758 | 768.34 | 1.09E-04 | 787.552 | 0.00911 | 874.008 | 0.0064  | 1176.193  | 0.01617 |
| 740.6725 | 1.83E-04 | 781.85 | 0.0075  | 768.47 | 1.07E-04 | 787.716 | 0.00901 | 874.264 | 0.00642 | 1176.5565 | 0.01672 |
| 740.8    | 1.79E-04 | 782    | 0.00741 | 768.6  | 1.04E-04 | 787.88  | 0.00891 | 874.52  | 0.00643 | 1176.92   | 0.01727 |
| 740.9275 | 1.76E-04 | 782.15 | 0.00732 | 768.73 | 1.02E-04 | 788.044 | 0.00881 | 874.776 | 0.00643 | 1177.2835 | 0.01782 |
| 741.055  | 1.72E-04 | 782.3  | 0.00723 | 768.86 | 9.95E-05 | 788.208 | 0.00871 | 875.032 | 0.00643 | 1177.647  | 0.01836 |
| 741.1825 | 1.69E-04 | 782.45 | 0.00714 | 768.99 | 9.73E-05 | 788.372 | 0.00861 | 875.288 | 0.00643 | 1178.0105 | 0.0189  |
| 741.31   | 1.65E-04 | 782.6  | 0.00705 | 769.12 | 9.51E-05 | 788.536 | 0.0085  | 875.544 | 0.00642 | 1178.374  | 0.01943 |
| 741.4375 | 1.62E-04 | 782.75 | 0.00696 | 769.25 | 9.30E-05 | 788.7   | 0.0084  | 875.8   | 0.00641 | 1178.7375 | 0.01995 |
| 741.565  | 1.58E-04 | 782.9  | 0.00687 | 769.38 | 9.09E-05 | 788.864 | 0.00829 | 876.056 | 0.0064  | 1179.101  | 0.02045 |
| 741.6925 | 1.55E-04 | 783.05 | 0.00677 | 769.51 | 8.88E-05 | 789.028 | 0.00818 | 876.312 | 0.00638 | 1179.4645 | 0.02095 |
| 741.82   | 1.52E-04 | 783.2  | 0.00668 | 769.64 | 8.68E-05 | 789.192 | 0.00807 | 876.568 | 0.00635 | 1179.828  | 0.02143 |
| 741.9475 | 1.48E-04 | 783.35 | 0.00659 | 769.77 | 8.48E-05 | 789.356 | 0.00797 | 876.824 | 0.00633 | 1180.1915 | 0.02189 |
| 742.075  | 1.45E-04 | 783.5  | 0.0065  | 769.9  | 8.29E-05 | 789.52  | 0.00786 | 877.08  | 0.0063  | 1180.555  | 0.02233 |
| 742.2025 | 1.42E-04 | 783.65 | 0.0064  | 770.03 | 8.10E-05 | 789.684 | 0.00775 | 877.336 | 0.00626 | 1180.9185 | 0.02276 |
| 742.33   | 1.39E-04 | 783.8  | 0.00631 | 770.16 | 7.92E-05 | 789.848 | 0.00764 | 877.592 | 0.00622 | 1181.282  | 0.02316 |
| 742.4575 | 1.36E-04 | 783.95 | 0.00622 | 770.29 | 7.74E-05 | 790.012 | 0.00752 | 877.848 | 0.00618 | 1181.6455 | 0.02354 |
| 742.585  | 1.33E-04 | 784.1  | 0.00613 | 770.42 | 7.56E-05 | 790.176 | 0.00741 | 878.104 | 0.00613 | 1182.009  | 0.0239  |
| 742.7125 | 1.30E-04 | 784.25 | 0.00603 | 770.55 | 7.39E-05 | 790.34  | 0.0073  | 878.36  | 0.00608 | 1182.3725 | 0.02423 |
| 742.84   | 1.27E-04 | 784.4  | 0.00594 | 770.68 | 7.22E-05 | 790.504 | 0.00719 | 878.616 | 0.00603 | 1182.736  | 0.02453 |
| 742.9675 | 1.24E-04 | 784.55 | 0.00585 | 770.81 | 7.06E-05 | 790.668 | 0.00708 | 878.872 | 0.00597 | 1183.0995 | 0.0248  |
| 743.095  | 1.21E-04 | 784.7  | 0.00576 | 770.94 | 6.90E-05 | 790.832 | 0.00697 | 879.128 | 0.00591 | 1183.463  | 0.02504 |
| 743.2225 | 1.19E-04 | 784.85 | 0.00566 | 771.07 | 6.74E-05 | 790.996 | 0.00685 | 879.384 | 0.00584 | 1183.8265 | 0.02526 |
| 743.35   | 1.16E-04 | 785    | 0.00557 | 771.2  | 6.58E-05 | 791.16  | 0.00674 | 879.64  | 0.00578 | 1184.19   | 0.02544 |
| 743.4775 | 1.13E-04 | 785.15 | 0.00548 | 771.33 | 6.43E-05 | 791.324 | 0.00663 | 879.896 | 0.00571 | 1184.5535 | 0.02559 |
| 743.605  | 1.11E-04 | 785.3  | 0.00539 | 771.46 | 6.28E-05 | 791.488 | 0.00652 | 880.152 | 0.00563 | 1184.917  | 0.0257  |
| 743.7325 | 1.08E-04 | 785.45 | 0.0053  | 771.59 | 6.14E-05 | 791.652 | 0.0064  | 880.408 | 0.00556 | 1185.2805 | 0.02578 |
| 743.86   | 1.05E-04 | 785.6  | 0.00521 | 771.72 | 6.00E-05 | 791.816 | 0.00629 | 880.664 | 0.00548 | 1185.644  | 0.02583 |
| 743.9875 | 1.03E-04 | 785.75 | 0.00512 | 771.85 | 5.86E-05 | 791.98  | 0.00618 | 880.92  | 0.0054  | 1186.0075 | 0.02585 |
| 744.115  | 1.00E-04 | 785.9  | 0.00503 | 771.98 | 5.72E-05 | 792.144 | 0.00607 | 881.176 | 0.00532 | 1186.371  | 0.02583 |
| 744.2425 | 9.80E-05 | 786.05 | 0.00494 | 772.11 | 5.59E-05 | 792.308 | 0.00596 | 881.432 | 0.00523 | 1186.7345 | 0.02578 |
| 744.37   | 9.57E-05 | 786.2  | 0.00485 | 772.24 | 5.46E-05 | 792.472 | 0.00585 | 881.688 | 0.00514 | 1187.098  | 0.02569 |
| 744.4975 | 9.34E-05 | 786.35 | 0.00476 | 772.37 | 5.33E-05 | 792.636 | 0.00574 | 881.944 | 0.00505 | 1187.4615 | 0.02557 |
| 744.625  | 9.11E-05 | 786.5  | 0.00467 | 772.5  | 5.20E-05 | 792.8   | 0.00563 | 882.2   | 0.00496 | 1187.825  | 0.02542 |
| 744.7525 | 8.88E-05 | 786.65 | 0.00458 | 772.63 | 5.08E-05 | 792.964 | 0.00552 | 882.456 | 0.00487 | 1188.1885 | 0.02523 |
| 744.88   | 8.66E-05 | 786.8  | 0.0045  | 772.76 | 4.96E-05 | 793.128 | 0.00541 | 882.712 | 0.00478 | 1188.552  | 0.02501 |
| 745.0075 | 8.45E-05 | 786.95 | 0.00441 | 772.89 | 4.84E-05 | 793.292 | 0.00531 | 882.968 | 0.00468 | 1188.9155 | 0.02477 |
| 745.135  | 8.24E-05 | 787.1  | 0.00433 | 773.02 | 4.73E-05 | 793.456 | 0.0052  | 883.224 | 0.00459 | 1189.279  | 0.02449 |
| 745.2625 | 8.03E-05 | 787.25 | 0.00424 | 773.15 | 4.62E-05 | 793.62  | 0.00509 | 883.48  | 0.00449 | 1189.6425 | 0.02418 |
| 745.39   | 7.83E-05 | 787.4  | 0.00416 | 773.28 | 4.51E-05 | 793.784 | 0.00499 | 883.736 | 0.00439 | 1190.006  | 0.02385 |
| 745.5175 | 7.63E-05 | 787.55 | 0.00407 | 773.41 | 4.40E-05 | 793.948 | 0.00488 | 883.992 | 0.00429 | 1190.3695 | 0.02349 |
| 745.645  | 7.43E-05 | 787.7  | 0.00399 | 773.54 | 4.30E-05 | 794.112 | 0.00478 | 884.248 | 0.00419 | 1190.733  | 0.0231  |
| 745.7725 | 7.24E-05 | 787.85 | 0.00391 | 773.67 | 4.19E-05 | 794.276 | 0.00468 | 884.504 | 0.0041  | 1191.0965 | 0.02269 |
| 745.9    | 7.05E-05 | 788    | 0.00383 | 773.8  | 4.09E-05 | 794.44  | 0.00458 | 884.76  | 0.004   | 1191.46   | 0.02226 |
| 746.0275 | 6.87E-05 | 788.15 | 0.00375 | 773.93 | 3.99E-05 | 794.604 | 0.00448 | 885.016 | 0.0039  | 1191.8235 | 0.02181 |
| 746.155  | 6.69E-05 | 788.3  | 0.00367 | 774.06 | 3.90E-05 | 794.768 | 0.00438 | 885.272 | 0.0038  | 1192.187  | 0.02134 |
| 746.2825 | 6.51E-05 | 788.45 | 0.00359 | 774.19 | 3.80E-05 | 794.932 | 0.00428 | 885.528 | 0.0037  | 1192.5505 | 0.02085 |
| 746.41   | 6.34E-05 | 788.6  | 0.00351 | 774.32 | 3.71E-05 | 795.096 | 0.00418 | 885.784 | 0.0036  | 1192.914  | 0.02035 |

|          |          |        |         |        |          |         |         |         |          |           |         |
|----------|----------|--------|---------|--------|----------|---------|---------|---------|----------|-----------|---------|
| 746.5375 | 6.17E-05 | 788.75 | 0.00344 | 774.45 | 3.62E-05 | 795.26  | 0.00409 | 886.04  | 0.0035   | 1193.2775 | 0.01983 |
| 746.665  | 6.01E-05 | 788.9  | 0.00336 | 774.58 | 3.53E-05 | 795.424 | 0.00399 | 886.296 | 0.0034   | 1193.641  | 0.0193  |
| 746.7925 | 5.85E-05 | 789.05 | 0.00329 | 774.71 | 3.44E-05 | 795.588 | 0.0039  | 886.552 | 0.0033   | 1194.0045 | 0.01876 |
| 746.92   | 5.69E-05 | 789.2  | 0.00321 | 774.84 | 3.36E-05 | 795.752 | 0.0038  | 886.808 | 0.0032   | 1194.368  | 0.01821 |
| 747.0475 | 5.53E-05 | 789.35 | 0.00314 | 774.97 | 3.28E-05 | 795.916 | 0.00371 | 887.064 | 0.00311  | 1194.7315 | 0.01765 |
| 747.175  | 5.38E-05 | 789.5  | 0.00307 | 775.1  | 3.20E-05 | 796.08  | 0.00362 | 887.32  | 0.00301  | 1195.095  | 0.01709 |
| 747.3025 | 5.23E-05 | 789.65 | 0.003   | 775.23 | 3.12E-05 | 796.244 | 0.00353 | 887.576 | 0.00292  | 1195.4585 | 0.01652 |
| 747.43   | 5.09E-05 | 789.8  | 0.00293 | 775.36 | 3.04E-05 | 796.408 | 0.00345 | 887.832 | 0.00282  | 1195.822  | 0.01595 |
| 747.5575 | 4.95E-05 | 789.95 | 0.00286 | 775.49 | 2.96E-05 | 796.572 | 0.00336 | 888.088 | 0.00273  | 1196.1855 | 0.01538 |
| 747.685  | 4.81E-05 | 790.1  | 0.00279 | 775.62 | 2.89E-05 | 796.736 | 0.00327 | 888.344 | 0.00264  | 1196.549  | 0.01481 |
| 747.8125 | 4.67E-05 | 790.25 | 0.00272 | 775.75 | 2.82E-05 | 796.9   | 0.00319 | 888.6   | 0.00255  | 1196.9125 | 0.01425 |
| 747.94   | 4.54E-05 | 790.4  | 0.00266 | 775.88 | 2.74E-05 | 797.064 | 0.00311 | 888.856 | 0.00246  | 1197.276  | 0.01368 |
| 748.0675 | 4.41E-05 | 790.55 | 0.00259 | 776.01 | 2.67E-05 | 797.228 | 0.00303 | 889.112 | 0.00238  | 1197.6395 | 0.01312 |
| 748.195  | 4.29E-05 | 790.7  | 0.00253 | 776.14 | 2.61E-05 | 797.392 | 0.00295 | 889.368 | 0.00229  | 1198.003  | 0.01257 |
| 748.3225 | 4.16E-05 | 790.85 | 0.00247 | 776.27 | 2.54E-05 | 797.556 | 0.00287 | 889.624 | 0.00221  | 1198.3665 | 0.01203 |
| 748.45   | 4.04E-05 | 791    | 0.00241 | 776.4  | 2.47E-05 | 797.72  | 0.00279 | 889.88  | 0.00213  | 1198.73   | 0.01149 |
| 748.5775 | 3.93E-05 | 791.15 | 0.00234 | 776.53 | 2.41E-05 | 797.884 | 0.00272 | 890.136 | 0.00205  | 1199.0935 | 0.01096 |
| 748.705  | 3.81E-05 | 791.3  | 0.00228 | 776.66 | 2.35E-05 | 798.048 | 0.00264 | 890.392 | 0.00197  | 1199.457  | 0.01045 |
| 748.8325 | 3.70E-05 | 791.45 | 0.00223 | 776.79 | 2.29E-05 | 798.212 | 0.00257 | 890.648 | 0.00189  | 1199.8205 | 0.00994 |
| 748.96   | 3.59E-05 | 791.6  | 0.00217 | 776.92 | 2.23E-05 | 798.376 | 0.0025  | 890.904 | 0.00182  | 1200.184  | 0.00945 |
| 749.0875 | 3.49E-05 | 791.75 | 0.00211 | 777.05 | 2.17E-05 | 798.54  | 0.00243 | 891.16  | 0.00174  | 1200.5475 | 0.00897 |
| 749.215  | 3.38E-05 | 791.9  | 0.00206 | 777.18 | 2.11E-05 | 798.704 | 0.00236 | 891.416 | 0.00167  | 1200.911  | 0.0085  |
| 749.3425 | 3.28E-05 | 792.05 | 0.002   | 777.31 | 2.06E-05 | 798.868 | 0.00229 | 891.672 | 0.0016   | 1201.2745 | 0.00805 |
| 749.47   | 3.18E-05 | 792.2  | 0.00195 | 777.44 | 2.00E-05 | 799.032 | 0.00222 | 891.928 | 0.00154  | 1201.638  | 0.00761 |
| 749.5975 | 3.09E-05 | 792.35 | 0.00189 | 777.57 | 1.95E-05 | 799.196 | 0.00216 | 892.184 | 0.00147  | 1202.0015 | 0.00718 |
| 749.725  | 2.99E-05 | 792.5  | 0.00184 | 777.7  | 1.90E-05 | 799.36  | 0.00209 | 892.44  | 0.00141  | 1202.365  | 0.00677 |
| 749.8525 | 2.90E-05 | 792.65 | 0.00179 | 777.83 | 1.85E-05 | 799.524 | 0.00203 | 892.696 | 0.00134  | 1202.7285 | 0.00638 |
| 749.98   | 2.81E-05 | 792.8  | 0.00174 | 777.96 | 1.80E-05 | 799.688 | 0.00197 | 892.952 | 0.00128  | 1203.092  | 0.006   |
| 750.1075 | 2.73E-05 | 792.95 | 0.00169 | 778.09 | 1.75E-05 | 799.852 | 0.00191 | 893.208 | 0.00123  | 1203.4555 | 0.00563 |
| 750.235  | 2.64E-05 | 793.1  | 0.00165 | 778.22 | 1.70E-05 | 800.016 | 0.00185 | 893.464 | 0.00117  | 1203.819  | 0.00528 |
| 750.3625 | 2.56E-05 | 793.25 | 0.0016  | 778.35 | 1.66E-05 | 800.18  | 0.00179 | 893.72  | 0.00112  | 1204.1825 | 0.00495 |
| 750.49   | 2.48E-05 | 793.4  | 0.00155 | 778.48 | 1.61E-05 | 800.344 | 0.00174 | 893.976 | 0.00106  | 1204.546  | 0.00463 |
| 750.6175 | 2.40E-05 | 793.55 | 0.00151 | 778.61 | 1.57E-05 | 800.508 | 0.00168 | 894.232 | 0.00101  | 1204.9095 | 0.00432 |
| 750.745  | 2.33E-05 | 793.7  | 0.00147 | 778.74 | 1.52E-05 | 800.672 | 0.00163 | 894.488 | 9.63E-04 | 1205.273  | 0.00403 |
| 750.8725 | 2.25E-05 | 793.85 | 0.00142 | 778.87 | 1.48E-05 | 800.836 | 0.00158 | 894.744 | 9.16E-04 | 1205.6365 | 0.00376 |
